# Supplementary material for: Whole-genome analysis of the methylome and hydroxymethylome in normal and malignant lung and liver
Source: HighWire-hosted journal article supplement (doi:10.1101/gr.211854.116), 2016-10-13
Supplement: Supplemental_Tables.xlsx [file Supplemental_Tables.xlsx]

## Sheet: Table S1
Supplemental Table S1. Summary of oxBS-Seq and BS-Seq libraires
Samples	libraries	Total_reads	covered_CpGs	average_depth	oxBS_conversion_rate	BS_conversion_rate	5mC_level	5hmC_level
liver_cancer1	BS	851655216	0.86528	14.2216	0.966776	0.996424	0.668986	0.0206614
	oxBS	866840092	0.850019	13.689		0.996065	0.648325
liver_normal1	BS	865991374	0.868321	14.5543	0.969501	0.996556	0.6618	0.0568159
liver_normal1_oxBS	oxBS	940598392	0.863566	14.9733		0.996596	0.604984
liver_cancer2	BS	1240214646	0.885575	21.5352	0.971227	0.996791	0.414177	0.00697802
liver_cancer2_oxBS	oxBS	1186382712	0.895896	19.2982		0.996685	0.407199
liver_normal2	BS	815256996	0.875431	14.0955	0.96759	0.996981	0.6629	0.0467616
liver_normal2_oxBS	oxBS	859453488	0.854657	13.0383		0.99642	0.616138
liver_cancer3	BS	930679778	0.871475	15.416	0.965644	0.996559	0.651244	0.00786248
liver_cancer3_oxBS	oxBS	882123486	0.862214	14.4428		0.996461	0.643382
liver_normal3	BS	912909126	0.87598	15.173	0.965123	0.996725	0.649125	0.0227039
liver_normal3_oxBS	oxBS	891754190	0.858674	14.5176		0.996521	0.626421
liver_cancer4	BS	659308360	0.866299	11.4974	0.972171	0.996778	0.465663	0.00864931
liver_cancer4_oxBS	oxBS	746368486	0.875621	12.8988		0.997304	0.457014
liver_normal4	BS	812097150	0.843662	11.8034	0.969893	0.995118	0.674386	0.0387141
liver_normal4_oxBS	oxBS	830323124	0.873945	13.7021		0.996998	0.635672
lung_cancer1	BS	1315257132	0.903707	22.0955	0.966678	0.997087	0.616628	0.010744
lung_cancer1	oxBS	1285514286	0.897431	21.6193		0.997225	0.605884
lung_normal1	BS	1266256300	0.900448	20.9122	0.966671	0.997123	0.674169	0.0193716
lung_normal2_oxBS	oxBS	1249143486	0.890229	19.892		0.996933	0.654798
lung_cancer2	BS	865024920	0.871604	14.4538	0.967144	0.996734	0.639428	0.00809037
lung_cancer2_oxBS	oxBS	952265058	0.874461	15.6802		0.996973	0.631337
lung_normal2	BS	897250308	0.870434	15.159	0.948685	0.996718	0.669489	0.0266993
lung_normal2_oxBS	oxBS	883748424	0.864316	14.9825		0.996877	0.64279
lung_cancer3	BS	806363714	0.882417	15.6061	0.963401	0.996966	0.581761	0.00649698
lung_cancer3_oxBS	oxBS	730098792	0.847354	10.8062		0.995444	0.575264
lung_normal3	BS	833689954	0.880077	14.7408	0.959346	0.996878	0.692451	0.0303851
lung_normal3_oxBS	oxBS	892899650	0.845862	11.3147		0.9948	0.662066

## Sheet: Table S2
Supplemental Table S2. Identification of 5hmC regions and sites
	5hmC level	5hmC regions	5hmC sites
Liver Normal	2.27%~5.68%	297724	3178223
Liver Tumor	0.70%~2.07%	37159	365443
Lung Normal	1.94~3.04%	89437	1013839
Lung Tumor	0.65%~1.07%	2255	15567

## Sheet: Table S3
Supplemental Table S3. List of identified 5hmC regions in normal liver
chr	start	end	width	5hmC level
chr1	839106	839752	647	0.0896499
chr1	842039	842652	614	0.106102
chr1	843065	843735	671	0.103203
chr1	846426	849284	2859	0.0813258
chr1	852956	855233	2278	0.0647052
chr1	855643	855996	354	0.0575788
chr1	861575	864035	2461	0.0875456
chr1	864819	865293	475	0.0597456
chr1	865922	867870	1949	0.0828219
chr1	868316	869374	1059	0.108783
chr1	870326	870716	391	0.0786215
chr1	873726	875184	1459	0.0861067
chr1	878356	878721	366	0.0619839
chr1	878987	879628	642	0.129615
chr1	880158	882968	2811	0.0768386
chr1	883699	885507	1809	0.0706038
chr1	886089	886357	269	0.0603532
chr1	887662	888239	578	0.0550761
chr1	891987	893397	1411	0.0626425
chr1	896686	899335	2650	0.091439
chr1	900479	901643	1165	0.088747
chr1	902895	903104	210	0.065599
chr1	909320	910298	979	0.0657569
chr1	913683	914382	700	0.0616804
chr1	915762	916115	354	0.0612654
chr1	918880	919368	489	0.0772918
chr1	932247	933600	1354	0.0883728
chr1	938311	941338	3028	0.10061
chr1	942354	942687	334	0.0763824
chr1	943431	943437	7	0.060538
chr1	944194	944246	53	0.0778895
chr1	949876	950928	1053	0.0830462
chr1	956557	961232	4676	0.104881
chr1	961622	963833	2212	0.0811523
chr1	966484	968127	1644	0.0930872
chr1	971024	973119	2096	0.0766752
chr1	973697	975798	2102	0.0752704
chr1	976544	977229	686	0.112413
chr1	977537	978804	1268	0.0709087
chr1	979677	980903	1227	0.0622702
chr1	981345	981996	652	0.0588678
chr1	982747	983690	944	0.0766225
chr1	984207	985003	797	0.059153
chr1	985212	985712	501	0.0530589
chr1	986179	987314	1136	0.0667472
chr1	988106	988633	528	0.0680863
chr1	989046	990096	1051	0.0655432
chr1	990815	991066	252	0.0636253
chr1	991432	991708	277	0.0692906
chr1	992410	993169	760	0.0649007
chr1	993522	993618	97	0.0587298
chr1	998722	999034	313	0.0659868
chr1	1003021	1003759	739	0.0994491
chr1	1005552	1006464	913	0.0842386
chr1	1008119	1009099	981	0.0578684
chr1	1010139	1010966	828	0.0619656
chr1	1017480	1017876	397	0.0551281
chr1	1018475	1020167	1693	0.0655193
chr1	1021144	1021978	835	0.064098
chr1	1026938	1027677	740	0.0628203
chr1	1033994	1034116	123	0.0576816
chr1	1038353	1040364	2012	0.0661836
chr1	1045472	1045971	500	0.0605552
chr1	1047018	1048203	1186	0.0579161
chr1	1049989	1050298	310	0.069605
chr1	1052655	1052965	311	0.0667834
chr1	1053575	1054151	577	0.0659392
chr1	1058122	1058919	798	0.0889923
chr1	1059423	1059911	489	0.0862755
chr1	1062145	1063616	1472	0.0862548
chr1	1064794	1065316	523	0.0667291
chr1	1067163	1067907	745	0.0629527
chr1	1068244	1069202	959	0.0852398
chr1	1071190	1072438	1249	0.093376
chr1	1077881	1078040	160	0.0584742
chr1	1079762	1081219	1458	0.0928288
chr1	1082863	1082979	117	0.059493
chr1	1091669	1092588	920	0.0940722
chr1	1095264	1096053	790	0.064074
chr1	1101753	1102023	271	0.0606701
chr1	1117778	1119085	1308	0.0691946
chr1	1131840	1132113	274	0.0692641
chr1	1134152	1136063	1912	0.0808462
chr1	1142656	1144241	1586	0.0634285
chr1	1145478	1145979	502	0.0653608
chr1	1147654	1152377	4724	0.0953115
chr1	1153072	1155058	1987	0.0755622
chr1	1156175	1156891	717	0.080443
chr1	1157451	1158697	1247	0.0626897
chr1	1159922	1161898	1977	0.0698029
chr1	1164263	1165605	1343	0.0692097
chr1	1168138	1168417	280	0.0584156
chr1	1168859	1172156	3298	0.0827144
chr1	1172458	1173205	748	0.0849372
chr1	1174262	1175003	742	0.0917864
chr1	1180735	1181121	387	0.0727485
chr1	1181370	1181803	434	0.0783779
chr1	1183178	1183528	351	0.0570576
chr1	1185999	1187028	1030	0.122238
chr1	1188545	1189222	678	0.0943691
chr1	1190376	1191430	1055	0.0546626
chr1	1193111	1194401	1291	0.0775385
chr1	1195323	1195592	270	0.0657467
chr1	1197260	1198756	1497	0.103856
chr1	1199508	1199893	386	0.0633916
chr1	1200306	1200858	553	0.0969736
chr1	1201264	1201769	506	0.0788859
chr1	1202298	1204472	2175	0.0758249
chr1	1204876	1207080	2205	0.13801
chr1	1207465	1207865	401	0.100673
chr1	1210089	1212223	2135	0.107006
chr1	1214119	1215448	1330	0.106364
chr1	1215822	1216715	894	0.0844679
chr1	1217836	1218836	1001	0.104727
chr1	1221023	1223181	2159	0.0671883
chr1	1225724	1226469	746	0.0843116
chr1	1228180	1229226	1047	0.0621497
chr1	1232120	1232482	363	0.0633772
chr1	1233204	1235314	2111	0.075862
chr1	1235529	1239591	4063	0.0849285
chr1	1240473	1242194	1722	0.100271
chr1	1244841	1248958	4118	0.0849965
chr1	1249991	1252032	2042	0.0940031
chr1	1252449	1252495	47	0.0725493
chr1	1252909	1253261	353	0.161003
chr1	1256301	1257814	1514	0.0714946
chr1	1258161	1259119	959	0.0690327
chr1	1263341	1264265	925	0.0823706
chr1	1264578	1265014	437	0.111541
chr1	1265511	1267235	1725	0.091001
chr1	1267559	1272507	4949	0.0827321
chr1	1272538	1273092	555	0.0707062
chr1	1273403	1276246	2844	0.086839
chr1	1276811	1278955	2145	0.0935858
chr1	1280141	1283210	3070	0.0982437
chr1	1286820	1288040	1221	0.130836
chr1	1290419	1290528	110	0.0523194
chr1	1304824	1305201	378	0.0761773
chr1	1306491	1307408	918	0.0950364
chr1	1311488	1312144	657	0.08263
chr1	1313083	1314040	958	0.0591164
chr1	1316033	1317573	1541	0.0907333
chr1	1318232	1320434	2203	0.11523
chr1	1321607	1323368	1762	0.0824163
chr1	1324735	1325077	343	0.0795733
chr1	1325448	1326856	1409	0.0707961
chr1	1330717	1331205	489	0.0955729
chr1	1332524	1333667	1144	0.0864431
chr1	1337826	1338236	411	0.0965221
chr1	1338917	1339564	648	0.168214
chr1	1340204	1340349	146	0.112345
chr1	1346975	1347671	697	0.113627
chr1	1359765	1360289	525	0.0582939
chr1	1360908	1361878	971	0.0924212
chr1	1364974	1365079	106	0.0919036
chr1	1367698	1368297	600	0.108126
chr1	1369133	1370871	1739	0.111852
chr1	1372627	1373745	1119	0.122626
chr1	1375371	1376236	866	0.0688449
chr1	1379499	1379898	400	0.071444
chr1	1388524	1388877	354	0.0953598
chr1	1408863	1409876	1014	0.089514
chr1	1412825	1413432	608	0.0590591
chr1	1418834	1420140	1307	0.0930806
chr1	1431442	1431853	412	0.0733817
chr1	1441612	1441872	261	0.0886319
chr1	1442456	1442462	7	0.0709561
chr1	1445684	1446251	568	0.0879133
chr1	1450746	1451207	462	0.0793333
chr1	1457070	1457398	329	0.126732
chr1	1464289	1465259	971	0.0728891
chr1	1470944	1474298	3355	0.0708473
chr1	1476388	1478170	1783	0.0819889
chr1	1482405	1483206	802	0.0732458
chr1	1487039	1488166	1128	0.0708329
chr1	1488517	1488886	370	0.123318
chr1	1490881	1492440	1560	0.0720393
chr1	1493647	1495810	2164	0.0732941
chr1	1496856	1497532	677	0.0594949
chr1	1499156	1499557	402	0.0670429
chr1	1499885	1500528	644	0.0832543
chr1	1500887	1503068	2182	0.135703
chr1	1503524	1504279	756	0.136106
chr1	1504791	1506229	1439	0.123975
chr1	1507014	1507545	532	0.0981634
chr1	1511093	1511693	601	0.112263
chr1	1517409	1517534	126	0.0674203
chr1	1536396	1536909	514	0.06237
chr1	1542062	1542647	586	0.0906948
chr1	1542998	1543146	149	0.063843
chr1	1545270	1546156	887	0.110783
chr1	1547234	1548216	983	0.0925171
chr1	1548838	1549359	522	0.123504
chr1	1552220	1554475	2256	0.0953121
chr1	1555784	1556530	747	0.0706032
chr1	1559197	1559872	676	0.0594133
chr1	1561141	1562552	1412	0.0699318
chr1	1562702	1562815	114	0.0536578
chr1	1563718	1564541	824	0.0639869
chr1	1585507	1585704	198	0.0531587
chr1	1596420	1597720	1301	0.0626707
chr1	1600982	1601025	44	0.0521027
chr1	1609215	1610994	1780	0.092343
chr1	1611561	1612366	806	0.126436
chr1	1613053	1613162	110	0.0685861
chr1	1613541	1615262	1722	0.0835625
chr1	1616681	1617301	621	0.133774
chr1	1625403	1625765	363	0.0732402
chr1	1657651	1657862	212	0.0725223
chr1	1673537	1673788	252	0.116863
chr1	1681567	1681614	48	0.106978
chr1	1683738	1684591	854	0.0802704
chr1	1685136	1686132	997	0.0970997
chr1	1687706	1689499	1794	0.0799369
chr1	1692988	1693920	933	0.0864781
chr1	1694240	1694705	466	0.131104
chr1	1699337	1699704	368	0.190462
chr1	1701023	1701037	15	0.0700288
chr1	1706065	1706284	220	0.0616705
chr1	1706884	1707697	814	0.178122
chr1	1710795	1713525	2731	0.169989
chr1	1714716	1715504	789	0.132294
chr1	1716147	1717029	883	0.081272
chr1	1718270	1720902	2633	0.0958763
chr1	1724668	1726932	2265	0.112225
chr1	1727335	1727796	462	0.0812645
chr1	1730900	1731415	516	0.0624422
chr1	1732389	1733113	725	0.12984
chr1	1737694	1738150	457	0.101104
chr1	1739060	1739443	384	0.186199
chr1	1739793	1740113	321	0.141622
chr1	1740723	1741229	507	0.10426
chr1	1741546	1741799	254	0.0955908
chr1	1745897	1746818	922	0.079822
chr1	1747188	1747750	563	0.0863552
chr1	1748391	1748692	302	0.0945964
chr1	1749173	1749679	507	0.0647063
chr1	1750372	1751521	1150	0.126555
chr1	1753080	1753587	508	0.114258
chr1	1754033	1754407	375	0.0831548
chr1	1756259	1756383	125	0.0973747
chr1	1757842	1758176	335	0.159726
chr1	1758654	1759477	824	0.069869
chr1	1760790	1761155	366	0.107306
chr1	1763767	1766030	2264	0.118776
chr1	1766386	1766685	300	0.0858316
chr1	1767339	1767652	314	0.0650601
chr1	1768972	1769379	408	0.0911508
chr1	1771977	1772952	976	0.111626
chr1	1773468	1773607	140	0.124175
chr1	1774314	1774504	191	0.129644
chr1	1774872	1775264	393	0.116149
chr1	1776698	1777727	1030	0.132146
chr1	1780242	1780624	383	0.154771
chr1	1783595	1784886	1292	0.0902765
chr1	1785211	1785622	412	0.14877
chr1	1786071	1786222	152	0.157521
chr1	1790760	1791032	273	0.105523
chr1	1792276	1792846	571	0.241142
chr1	1793361	1794548	1188	0.176798
chr1	1794858	1794957	100	0.205388
chr1	1801579	1802664	1086	0.134502
chr1	1802965	1804529	1565	0.150969
chr1	1804898	1805647	750	0.131147
chr1	1807809	1808465	657	0.139923
chr1	1810023	1810197	175	0.0830186
chr1	1813134	1813732	599	0.133082
chr1	1814087	1814587	501	0.136407
chr1	1817276	1817488	213	0.0812749
chr1	1819699	1820978	1280	0.114269
chr1	1823523	1827623	4101	0.0918314
chr1	1832268	1832456	189	0.066907
chr1	1832759	1833800	1042	0.0781821
chr1	1838255	1839174	920	0.115202
chr1	1846356	1847965	1610	0.0801299
chr1	1848398	1850099	1702	0.0886601
chr1	1851224	1854313	3090	0.11678
chr1	1854725	1855079	355	0.0662986
chr1	1855975	1860660	4686	0.0870217
chr1	1861040	1861293	254	0.0826397
chr1	1866968	1867326	359	0.0644713
chr1	1872538	1874514	1977	0.0631593
chr1	1878317	1879221	905	0.0754727
chr1	1889188	1889813	626	0.068439
chr1	1892516	1893070	555	0.0738093
chr1	1896364	1896695	332	0.0667404
chr1	1906079	1906400	322	0.056505
chr1	1915838	1916915	1078	0.0647404
chr1	1922303	1923028	726	0.142821
chr1	1941311	1941585	275	0.0933323
chr1	1954188	1955736	1549	0.0650797
chr1	1955941	1956993	1053	0.0639446
chr1	1957620	1958012	393	0.0574911
chr1	1958964	1959606	643	0.0632502
chr1	1960380	1960775	396	0.0587792
chr1	1962363	1962579	217	0.0672339
chr1	1970341	1971136	796	0.0599944
chr1	1972249	1975045	2797	0.081509
chr1	1979189	1980342	1154	0.0978103
chr1	1983033	1986275	3243	0.109471
chr1	1989721	1990100	380	0.076617
chr1	1991419	1993953	2535	0.0732559
chr1	2003971	2004621	651	0.0668574
chr1	2006365	2007374	1010	0.0718834
chr1	2016517	2017010	494	0.0786793
chr1	2017320	2017523	204	0.0857205
chr1	2018252	2018441	190	0.0583329
chr1	2018773	2019570	798	0.0930473
chr1	2020870	2021660	791	0.0679191
chr1	2023123	2023881	759	0.0653475
chr1	2024413	2024867	455	0.0591509
chr1	2031921	2032568	648	0.0557731
chr1	2034060	2035357	1298	0.0700178
chr1	2035976	2037702	1727	0.117566
chr1	2038319	2038628	310	0.0580251
chr1	2042611	2043607	997	0.0682528
chr1	2045607	2045647	41	0.0555465
chr1	2056109	2056908	800	0.0662328
chr1	2058668	2059922	1255	0.0834347
chr1	2062249	2063289	1041	0.0629415
chr1	2063685	2064676	992	0.0822742
chr1	2064848	2067250	2403	0.0828435
chr1	2067953	2070766	2814	0.0797848
chr1	2071147	2072090	944	0.0945492
chr1	2076054	2076877	824	0.0825277
chr1	2078316	2078592	277	0.0567084
chr1	2080954	2081315	362	0.0629227
chr1	2081665	2083478	1814	0.0802411
chr1	2085648	2086188	541	0.0585396
chr1	2088737	2090035	1299	0.0864951
chr1	2093921	2095504	1584	0.0717948
chr1	2097389	2098374	986	0.0844655
chr1	2099558	2100492	935	0.0945875
chr1	2103812	2106732	2921	0.0736912
chr1	2107086	2107475	390	0.0613901
chr1	2107829	2108897	1069	0.0626362
chr1	2111262	2111699	438	0.0615472
chr1	2112040	2112293	254	0.0736099
chr1	2117391	2118323	933	0.0624914
chr1	2119022	2120566	1545	0.069432
chr1	2121867	2124733	2867	0.0983038
chr1	2129291	2130469	1179	0.0803127
chr1	2132495	2133184	690	0.06437
chr1	2134098	2135918	1821	0.10654
chr1	2140119	2140893	775	0.101642
chr1	2141152	2142698	1547	0.0805019
chr1	2145837	2148488	2652	0.126823
chr1	2150857	2151333	477	0.114882
chr1	2152038	2152690	653	0.0923022
chr1	2153890	2154860	971	0.0787493
chr1	2155233	2156858	1626	0.105834
chr1	2157591	2158233	643	0.1164
chr1	2161278	2161886	609	0.0689099
chr1	2163219	2163568	350	0.0579119
chr1	2164380	2165505	1126	0.0799786
chr1	2166802	2167707	906	0.125095
chr1	2168095	2170111	2017	0.133517
chr1	2170272	2171451	1180	0.122675
chr1	2173730	2174493	764	0.0985909
chr1	2177514	2179434	1921	0.113928
chr1	2179933	2182034	2102	0.0866651
chr1	2183666	2184269	604	0.174358
chr1	2184586	2187457	2872	0.0943001
chr1	2187762	2189056	1295	0.175559
chr1	2189577	2191725	2149	0.156126
chr1	2194015	2194300	286	0.15057
chr1	2194955	2195412	458	0.139856
chr1	2196003	2197071	1069	0.132687
chr1	2197455	2201159	3705	0.107604
chr1	2202333	2207239	4907	0.125175
chr1	2209037	2211116	2080	0.112954
chr1	2211574	2211928	355	0.120524
chr1	2214051	2216677	2627	0.103376
chr1	2217602	2217662	61	0.149361
chr1	2218132	2218646	515	0.0880976
chr1	2218965	2219352	388	0.10967
chr1	2219888	2224324	4437	0.117627
chr1	2224791	2229291	4501	0.11157
chr1	2229836	2230747	912	0.100733
chr1	2231175	2238677	7503	0.0911673
chr1	2238810	2239031	222	0.0541313
chr1	2239480	2240350	871	0.0799519
chr1	2241613	2245895	4283	0.109348
chr1	2246953	2249406	2454	0.0875169
chr1	2252456	2252535	80	0.0532179
chr1	2256285	2256453	169	0.0696283
chr1	2256804	2256862	59	0.0698143
chr1	2259971	2260370	400	0.0563186
chr1	2261304	2262288	985	0.0981584
chr1	2266127	2266626	500	0.0526062
chr1	2270339	2270946	608	0.0638199
chr1	2273213	2273298	86	0.055444
chr1	2274504	2274837	334	0.0543132
chr1	2276932	2277378	447	0.0630812
chr1	2277684	2277801	118	0.0817105
chr1	2278114	2278753	640	0.0612837
chr1	2312772	2314052	1281	0.0593763
chr1	2314310	2315599	1290	0.074049
chr1	2316730	2316988	259	0.0547173
chr1	2320949	2321421	473	0.057695
chr1	2324866	2328194	3329	0.0891063
chr1	2328592	2328988	397	0.0673522
chr1	2330157	2332027	1871	0.070296
chr1	2332327	2332602	276	0.0662005
chr1	2332948	2333340	393	0.0859779
chr1	2333762	2338832	5071	0.0895836
chr1	2339294	2340464	1171	0.0765139
chr1	2340735	2341915	1181	0.0786185
chr1	2348669	2349402	734	0.0710936
chr1	2351725	2352334	610	0.0691047
chr1	2352663	2353129	467	0.0682392
chr1	2370985	2371300	316	0.0679177
chr1	2381519	2381930	412	0.0550543
chr1	2387085	2388024	940	0.0672559
chr1	2392868	2393562	695	0.0634458
chr1	2404241	2406342	2102	0.0816725
chr1	2407979	2409487	1509	0.0685427
chr1	2411980	2414302	2323	0.0659666
chr1	2416507	2418563	2057	0.0801252
chr1	2421841	2423032	1192	0.0647474
chr1	2423158	2425499	2342	0.0707052
chr1	2425853	2429266	3414	0.0702619
chr1	2430479	2433587	3109	0.0770164
chr1	2434585	2435215	631	0.0647303
chr1	2435958	2436175	218	0.0531936
chr1	2436455	2440765	4311	0.0749444
chr1	2442686	2443650	965	0.0573954
chr1	2443803	2445097	1295	0.0662075
chr1	2446256	2447204	949	0.0636658
chr1	2454638	2456885	2248	0.0972822
chr1	2458506	2459018	513	0.070983
chr1	2464115	2466785	2671	0.0876273
chr1	2467445	2468115	671	0.0690389
chr1	2471108	2471846	739	0.0711304
chr1	2473186	2477281	4096	0.100281
chr1	2478970	2479199	230	0.0604196
chr1	2482071	2482156	86	0.0865327
chr1	2482832	2482892	61	0.123134
chr1	2486018	2487010	993	0.114516
chr1	2488900	2489534	635	0.0843108
chr1	2489926	2490549	624	0.0719433
chr1	2490892	2496714	5823	0.0766192
chr1	2502607	2503079	473	0.0646405
chr1	2510042	2510754	713	0.107823
chr1	2513753	2515278	1526	0.0784199
chr1	2516206	2516686	481	0.0826684
chr1	2518949	2520973	2025	0.108689
chr1	2524153	2525386	1234	0.0696807
chr1	2531735	2532024	290	0.0598727
chr1	2532526	2534177	1652	0.0588633
chr1	2535491	2536201	711	0.0581559
chr1	2538837	2539813	977	0.0644797
chr1	2540540	2542317	1778	0.0705818
chr1	2553260	2553439	180	0.0769343
chr1	2553758	2554051	294	0.0757817
chr1	2572775	2573785	1011	0.100323
chr1	2575210	2576702	1493	0.0729145
chr1	2579907	2580511	605	0.054063
chr1	2614830	2615123	294	0.0845542
chr1	2628046	2628174	129	0.0683538
chr1	2695149	2695520	372	0.0612076
chr1	2695897	2696643	747	0.0708361
chr1	2724181	2724484	304	0.0559491
chr1	2725868	2726598	731	0.0606528
chr1	2742073	2742980	908	0.0675671
chr1	2747032	2748456	1425	0.0605832
chr1	2763393	2764256	864	0.0621089
chr1	2765201	2765391	191	0.0716356
chr1	2777612	2778179	568	0.0661631
chr1	2791783	2792173	391	0.0648152
chr1	2793169	2793928	760	0.0631932
chr1	2797796	2798095	300	0.0554077
chr1	2804413	2805692	1280	0.0982916
chr1	2812692	2813082	391	0.0556539
chr1	2826680	2827139	460	0.057561
chr1	2828763	2829587	825	0.0682953
chr1	2832917	2833055	139	0.0522503
chr1	2835105	2835851	747	0.0627483
chr1	2851044	2851466	423	0.0612765
chr1	2869567	2870125	559	0.056703
chr1	2885699	2886361	663	0.0684672
chr1	2887618	2887939	322	0.0533813
chr1	2916166	2916775	610	0.0581538
chr1	2930060	2931183	1124	0.0734252
chr1	2971314	2972061	748	0.0596438
chr1	2982216	2983747	1532	0.0913084
chr1	2987598	2988204	607	0.0857654
chr1	2989949	2990064	116	0.0559715
chr1	3002501	3003289	789	0.0598226
chr1	3009458	3009655	198	0.0566877
chr1	3011125	3012083	959	0.0669535
chr1	3017070	3017818	749	0.0698664
chr1	3027189	3027386	198	0.0550762
chr1	3032587	3033941	1355	0.0764173
chr1	3036821	3037655	835	0.0593314
chr1	3038789	3040059	1271	0.0662893
chr1	3040531	3041734	1204	0.0644286
chr1	3041895	3044672	2778	0.0897523
chr1	3048691	3049712	1022	0.059355
chr1	3050958	3051662	705	0.0630755
chr1	3053584	3053904	321	0.0571701
chr1	3058603	3059866	1264	0.0712893
chr1	3060287	3060893	607	0.0844399
chr1	3063082	3063404	323	0.0525226
chr1	3066100	3066141	42	0.0533137
chr1	3072767	3073378	612	0.0711964
chr1	3074497	3074821	325	0.063428
chr1	3079886	3080696	811	0.0684828
chr1	3081373	3081717	345	0.0636891
chr1	3082539	3083720	1182	0.0668198
chr1	3085103	3085851	749	0.0712262
chr1	3086009	3087005	997	0.107668
chr1	3088361	3089762	1402	0.101326
chr1	3090263	3091321	1059	0.0798492
chr1	3091574	3092424	851	0.0719027
chr1	3096665	3096815	151	0.0535363
chr1	3098765	3099971	1207	0.0722803
chr1	3100792	3101018	227	0.0532458
chr1	3103552	3103696	145	0.0593378
chr1	3108516	3109516	1001	0.0675963
chr1	3114367	3114820	454	0.0701974
chr1	3119043	3119501	459	0.0543656
chr1	3129963	3131359	1397	0.0846569
chr1	3134122	3135443	1322	0.0699718
chr1	3139227	3140362	1136	0.092388
chr1	3145888	3146829	942	0.0655783
chr1	3152571	3152651	81	0.0527709
chr1	3156189	3156446	258	0.0638963
chr1	3174272	3174370	99	0.060745
chr1	3182785	3183261	477	0.0758344
chr1	3187494	3188470	977	0.0678877
chr1	3196740	3197198	459	0.06115
chr1	3206227	3207016	790	0.0612051
chr1	3209519	3209910	392	0.0610384
chr1	3214302	3215095	794	0.0682752
chr1	3227787	3227998	212	0.0523453
chr1	3230179	3231626	1448	0.0718559
chr1	3244163	3245521	1359	0.0622815
chr1	3256742	3257221	480	0.0598595
chr1	3258627	3259148	522	0.0573304
chr1	3264975	3265536	562	0.0673187
chr1	3269935	3270754	820	0.0610536
chr1	3278562	3278691	130	0.0558324
chr1	3285059	3285756	698	0.0593918
chr1	3292316	3292580	265	0.0543985
chr1	3297522	3298143	622	0.0589074
chr1	3300952	3302150	1199	0.0553704
chr1	3307210	3307350	141	0.0545941
chr1	3307679	3307693	15	0.0572816
chr1	3319748	3320161	414	0.0711371
chr1	3326612	3327322	711	0.0787044
chr1	3349875	3350066	192	0.0562245
chr1	3368945	3370690	1746	0.0800018
chr1	3371874	3375351	3478	0.101798
chr1	3375707	3376895	1189	0.0990609
chr1	3378410	3379288	879	0.0649639
chr1	3388196	3389106	911	0.0766368
chr1	3390358	3391021	664	0.0655185
chr1	3394013	3396849	2837	0.109859
chr1	3398428	3399434	1007	0.0758351
chr1	3399841	3400857	1017	0.0692167
chr1	3408514	3409607	1094	0.0680899
chr1	3410098	3410709	612	0.0566192
chr1	3411562	3412391	830	0.0576499
chr1	3415207	3415774	568	0.0664934
chr1	3417578	3418117	540	0.0572418
chr1	3418256	3418617	362	0.0539728
chr1	3418778	3422136	3359	0.0863399
chr1	3423011	3424387	1377	0.0674201
chr1	3426156	3426560	405	0.0566093
chr1	3429360	3429597	238	0.0531509
chr1	3436928	3438298	1371	0.072862
chr1	3440499	3440918	420	0.0603966
chr1	3442241	3443664	1424	0.0813756
chr1	3444028	3445796	1769	0.0987145
chr1	3446389	3447093	705	0.122529
chr1	3448424	3451354	2931	0.0894781
chr1	3455199	3455550	352	0.063413
chr1	3456509	3457497	989	0.0914898
chr1	3459265	3459322	58	0.0623766
chr1	3467126	3469535	2410	0.0697421
chr1	3470120	3470598	479	0.0608594
chr1	3471390	3471535	146	0.0583696
chr1	3476608	3476861	254	0.0544074
chr1	3478262	3479515	1254	0.0590708
chr1	3481042	3482184	1143	0.0696863
chr1	3484901	3486007	1107	0.0806021
chr1	3487516	3488329	814	0.0754583
chr1	3489762	3491115	1354	0.0877785
chr1	3496659	3497802	1144	0.078757
chr1	3501674	3501927	254	0.0570549
chr1	3502465	3503081	617	0.0647621
chr1	3508173	3508571	399	0.0724017
chr1	3510095	3511431	1337	0.0622152
chr1	3512697	3513006	310	0.0834146
chr1	3514227	3514772	546	0.0677314
chr1	3526267	3526979	713	0.0798974
chr1	3528680	3529436	757	0.0786565
chr1	3529896	3530913	1018	0.0587953
chr1	3531505	3532230	726	0.0596237
chr1	3535171	3535736	566	0.0679261
chr1	3538758	3540478	1721	0.0996023
chr1	3544856	3548710	3855	0.0703421
chr1	3560965	3561185	221	0.0665175
chr1	3563521	3563616	96	0.0544988
chr1	3563954	3564373	420	0.0546609
chr1	3581570	3582126	557	0.0592001
chr1	3583022	3584052	1031	0.0729484
chr1	3584813	3585323	511	0.141572
chr1	3587790	3587817	28	0.0569477
chr1	3589879	3590751	873	0.0750431
chr1	3593087	3594121	1035	0.0733711
chr1	3604684	3605255	572	0.0573768
chr1	3609696	3610008	313	0.0561487
chr1	3611786	3612887	1102	0.0732668
chr1	3619820	3620218	399	0.0577639
chr1	3621741	3622455	715	0.0723633
chr1	3627780	3628403	624	0.0622806
chr1	3629790	3631202	1413	0.0731669
chr1	3632467	3633982	1516	0.0801612
chr1	3637168	3638238	1071	0.0614246
chr1	3639585	3641577	1993	0.0626986
chr1	3645828	3646012	185	0.0798545
chr1	3646319	3646399	81	0.0579319
chr1	3647495	3648749	1255	0.0612894
chr1	3649427	3650838	1412	0.0870487
chr1	3651882	3652526	645	0.0557993
chr1	3655806	3655824	19	0.0618469
chr1	3657228	3657783	556	0.0796298
chr1	3660553	3661665	1113	0.104424
chr1	3678171	3678520	350	0.0550204
chr1	3683682	3685835	2154	0.0869729
chr1	3686753	3688564	1812	0.093859
chr1	3689934	3691767	1834	0.0971825
chr1	3692616	3694570	1955	0.0756329
chr1	3695942	3697831	1890	0.0838481
chr1	3698626	3699721	1096	0.0614613
chr1	3700310	3700629	320	0.0580801
chr1	3703648	3705916	2269	0.0787513
chr1	3706470	3708315	1846	0.0654435
chr1	3709302	3710488	1187	0.135666
chr1	3710867	3711346	480	0.093992
chr1	3727069	3728238	1170	0.125283
chr1	3731977	3733038	1062	0.0590564
chr1	3739128	3739832	705	0.0547078
chr1	3745923	3746293	371	0.0591025
chr1	3751384	3751488	105	0.0661485
chr1	3752214	3752448	235	0.0751558
chr1	3752863	3752959	97	0.0552224
chr1	3759631	3759874	244	0.0543447
chr1	3771806	3772069	264	0.0852377
chr1	3775962	3776252	291	0.0728702
chr1	3792137	3792310	174	0.0588579
chr1	3794400	3794677	278	0.0638198
chr1	3795910	3798909	3000	0.0865038
chr1	3799220	3799563	344	0.0681107
chr1	3802275	3802615	341	0.0598272
chr1	3803721	3804489	769	0.0567103
chr1	3807847	3808427	581	0.0995569
chr1	3809348	3809704	357	0.06981
chr1	3810238	3810802	565	0.0650522
chr1	3811331	3813417	2087	0.0773983
chr1	3818739	3819498	760	0.0854978
chr1	3823497	3824257	761	0.0806684
chr1	3825350	3826091	742	0.0632313
chr1	3828589	3829447	859	0.0604403
chr1	3829873	3830346	474	0.065983
chr1	3830649	3830743	95	0.0571907
chr1	3834057	3834483	427	0.055791
chr1	3837253	3839109	1857	0.0757888
chr1	3844197	3845187	991	0.0619375
chr1	4014993	4015548	556	0.0661003
chr1	4016658	4017360	703	0.063183
chr1	4037663	4037901	239	0.0562322
chr1	4104687	4105264	578	0.084181
chr1	4111789	4112074	286	0.0600707
chr1	4131360	4132250	891	0.0606024
chr1	4136615	4136869	255	0.0568971
chr1	4144439	4145773	1335	0.0809385
chr1	4146700	4147672	973	0.0681417
chr1	4148023	4148803	781	0.0725633
chr1	4168865	4169140	276	0.0568117
chr1	4178851	4180338	1488	0.0779952
chr1	4326162	4326416	255	0.0741527
chr1	4360130	4360287	158	0.0526265
chr1	4368757	4369228	472	0.0582186
chr1	4384081	4384707	627	0.0675975
chr1	4431305	4432173	869	0.0652837
chr1	4432851	4433155	305	0.0820332
chr1	4433563	4434189	627	0.0727182
chr1	4449067	4450657	1591	0.0645936
chr1	4489468	4489733	266	0.0562244
chr1	4490290	4491804	1515	0.0701207
chr1	4529877	4531052	1176	0.0581863
chr1	4554420	4555438	1019	0.066693
chr1	4557264	4557642	379	0.0674121
chr1	4557958	4558168	211	0.0586892
chr1	4564193	4565060	868	0.0655534
chr1	4571159	4572365	1207	0.0748851
chr1	4572746	4573103	358	0.0819058
chr1	4586155	4588841	2687	0.0818679
chr1	4611219	4611470	252	0.0713179
chr1	4611776	4612210	435	0.0624827
chr1	4627071	4628105	1035	0.0791104
chr1	4667629	4668156	528	0.0544195
chr1	4674631	4675403	773	0.0565929
chr1	4680982	4681378	397	0.056895
chr1	4694193	4695636	1444	0.058748
chr1	4697674	4697985	312	0.0577184
chr1	4703646	4704137	492	0.0715985
chr1	4704535	4705011	477	0.0673576
chr1	4719265	4720320	1056	0.076732
chr1	4731754	4732399	646	0.0574426
chr1	4733592	4733949	358	0.0678795
chr1	4752109	4753873	1765	0.0741842
chr1	4759200	4759489	290	0.0545765
chr1	4770492	4770890	399	0.0693684
chr1	4793637	4794148	512	0.0565138
chr1	4823379	4824918	1540	0.0686089
chr1	4829849	4830044	196	0.0553173
chr1	4836011	4836674	664	0.0597157
chr1	4844385	4845465	1081	0.0648803
chr1	4959701	4959991	291	0.0699837
chr1	4960324	4960952	629	0.0880497
chr1	4971694	4971754	61	0.0529576
chr1	4981069	4981424	356	0.0975707
chr1	4983053	4983816	764	0.0826989
chr1	5026546	5027676	1131	0.0665141
chr1	5032776	5033233	458	0.055635
chr1	5035613	5036225	613	0.0635899
chr1	5073516	5074510	995	0.053635
chr1	5076630	5077122	493	0.0582614
chr1	5077664	5077806	143	0.0582988
chr1	5092506	5093042	537	0.0587931
chr1	5142323	5143161	839	0.0663659
chr1	5170634	5172104	1471	0.0644841
chr1	5172734	5173508	775	0.0740721
chr1	5315266	5316361	1096	0.0619974
chr1	5324424	5324894	471	0.0620076
chr1	5337341	5338761	1421	0.0622081
chr1	5388938	5389768	831	0.05953
chr1	5418730	5419171	442	0.0779687
chr1	5419478	5419949	472	0.0688863
chr1	5424565	5425392	828	0.0612995
chr1	5425877	5426050	174	0.0561463
chr1	5429950	5432209	2260	0.0796579
chr1	5434220	5434800	581	0.0564413
chr1	5442120	5442913	794	0.0601017
chr1	5447942	5448872	931	0.0726351
chr1	5452199	5452956	758	0.061897
chr1	5478611	5478719	109	0.05527
chr1	5483364	5484372	1009	0.07466
chr1	5493902	5494517	616	0.055115
chr1	5509250	5509758	509	0.0598615
chr1	5544839	5545815	977	0.0595253
chr1	5553525	5555215	1691	0.077087
chr1	5561737	5562169	433	0.0633907
chr1	5615931	5616612	682	0.0648119
chr1	5745251	5746178	928	0.0715587
chr1	5749788	5749881	94	0.0544288
chr1	5767082	5768541	1460	0.0559258
chr1	5777812	5778355	544	0.0723405
chr1	5810239	5810736	498	0.0536344
chr1	5836002	5836123	122	0.0538164
chr1	5874571	5874960	390	0.0625134
chr1	5915303	5915780	478	0.0584972
chr1	5922180	5922801	622	0.0522239
chr1	5925303	5926071	769	0.0636194
chr1	5930557	5932273	1717	0.0710251
chr1	5938591	5938645	55	0.0522956
chr1	5941247	5942588	1342	0.0608399
chr1	5944005	5944406	402	0.0597334
chr1	5946617	5946965	349	0.063946
chr1	5961027	5961410	384	0.0632327
chr1	5961732	5962618	887	0.0665492
chr1	5979485	5980286	802	0.0898702
chr1	6005092	6005668	577	0.0547069
chr1	6007675	6008759	1085	0.0906708
chr1	6010190	6011198	1009	0.0861671
chr1	6013745	6014069	325	0.0603453
chr1	6015188	6016787	1600	0.0720237
chr1	6019205	6020930	1726	0.0698996
chr1	6024027	6024809	783	0.0648412
chr1	6026596	6027945	1350	0.0754883
chr1	6030511	6031238	728	0.0642398
chr1	6031689	6032210	522	0.0670171
chr1	6041171	6041454	284	0.0644863
chr1	6050299	6051332	1034	0.107344
chr1	6059249	6059568	320	0.058711
chr1	6066837	6067504	668	0.0984807
chr1	6074502	6074864	363	0.075303
chr1	6075341	6075858	518	0.0830347
chr1	6082417	6083611	1195	0.0783432
chr1	6105939	6107455	1517	0.0569828
chr1	6116755	6117857	1103	0.0757817
chr1	6118378	6119686	1309	0.0691973
chr1	6128472	6129110	639	0.0597649
chr1	6131199	6131399	201	0.0559281
chr1	6135215	6138122	2908	0.060764
chr1	6159377	6159924	548	0.0595935
chr1	6169524	6170163	640	0.0668927
chr1	6170391	6171027	637	0.061296
chr1	6185477	6186090	614	0.0657376
chr1	6189304	6190383	1080	0.0705527
chr1	6208160	6208369	210	0.0851723
chr1	6214076	6214829	754	0.0565759
chr1	6224797	6225214	418	0.0520698
chr1	6241901	6242016	116	0.0782669
chr1	6242407	6243366	960	0.090804
chr1	6243703	6244835	1133	0.0943325
chr1	6247052	6247120	69	0.0831559
chr1	6247822	6248021	200	0.0877384
chr1	6248351	6249497	1147	0.0915388
chr1	6256742	6257929	1188	0.132273
chr1	6266903	6268340	1438	0.117322
chr1	6271841	6272392	552	0.0636983
chr1	6277805	6279583	1779	0.0652408
chr1	6280100	6282218	2119	0.0710216
chr1	6282618	6283139	522	0.138524
chr1	6283499	6283982	484	0.0925091
chr1	6284355	6286182	1828	0.068435
chr1	6290458	6290503	46	0.128753
chr1	6291079	6291526	448	0.083145
chr1	6294631	6295024	394	0.093779
chr1	6296700	6296872	173	0.110192
chr1	6299579	6299694	116	0.0560112
chr1	6300044	6301275	1232	0.0679867
chr1	6307676	6307856	181	0.0661373
chr1	6308312	6309013	702	0.0739429
chr1	6310369	6312268	1900	0.0752613
chr1	6316552	6319674	3123	0.120838
chr1	6322456	6323419	964	0.0714879
chr1	6324191	6325084	894	0.0582096
chr1	6327902	6328733	832	0.0591755
chr1	6330608	6331359	752	0.0674379
chr1	6333156	6334384	1229	0.0874812
chr1	6338594	6338964	371	0.0526859
chr1	6340584	6342724	2141	0.0818616
chr1	6355242	6355905	664	0.0685842
chr1	6358596	6359257	662	0.0684932
chr1	6359617	6359789	173	0.0585116
chr1	6360464	6360559	96	0.0513471
chr1	6361588	6364497	2910	0.0794513
chr1	6390715	6391694	980	0.0608126
chr1	6396666	6398001	1336	0.0611279
chr1	6399174	6399645	472	0.0559073
chr1	6401845	6404563	2719	0.0944023
chr1	6404904	6405333	430	0.0719301
chr1	6408722	6412113	3392	0.0918619
chr1	6414978	6415947	970	0.113865
chr1	6417002	6419231	2230	0.114705
chr1	6420535	6422485	1951	0.0851831
chr1	6425149	6425551	403	0.123954
chr1	6426232	6426422	191	0.0968535
chr1	6428094	6429332	1239	0.0885359
chr1	6433562	6433662	101	0.111402
chr1	6434210	6434621	412	0.0868662
chr1	6436872	6437028	157	0.0882029
chr1	6438123	6439773	1651	0.108194
chr1	6445217	6446339	1123	0.0726516
chr1	6449637	6449990	354	0.0695407
chr1	6457567	6458560	994	0.0985207
chr1	6463257	6463594	338	0.0607227
chr1	6475317	6476339	1023	0.0777327
chr1	6477160	6477581	422	0.0582212
chr1	6477923	6477939	17	0.0564383
chr1	6482954	6483438	485	0.105281
chr1	6486104	6486496	393	0.058159
chr1	6520241	6521394	1154	0.108908
chr1	6521619	6523198	1580	0.0728122
chr1	6523508	6523514	7	0.10338
chr1	6524055	6525809	1755	0.0811095
chr1	6528905	6530205	1301	0.0684548
chr1	6532561	6533485	925	0.0825604
chr1	6534711	6535135	425	0.0901559
chr1	6539703	6540074	372	0.0631887
chr1	6547879	6548580	702	0.0580708
chr1	6551367	6554080	2714	0.122646
chr1	6554482	6555934	1453	0.116476
chr1	6560690	6561199	510	0.0562909
chr1	6561702	6562476	775	0.0671559
chr1	6566898	6568717	1820	0.0847433
chr1	6572876	6574120	1245	0.0582434
chr1	6576218	6576443	226	0.058363
chr1	6577078	6577182	105	0.0571698
chr1	6577501	6578386	886	0.0677356
chr1	6584484	6584539	56	0.0651333
chr1	6594226	6595607	1382	0.0737738
chr1	6600481	6600579	99	0.0655699
chr1	6633209	6633246	38	0.0690022
chr1	6638127	6639570	1444	0.117174
chr1	6641290	6641580	291	0.0818273
chr1	6643384	6643650	267	0.136192
chr1	6644121	6650956	6836	0.108584
chr1	6651323	6654249	2927	0.0948523
chr1	6654752	6655195	444	0.141535
chr1	6655530	6655654	125	0.147166
chr1	6656197	6658315	2119	0.130943
chr1	6658617	6660060	1444	0.130638
chr1	6660398	6660640	243	0.129296
chr1	6664716	6665620	905	0.0949903
chr1	6666391	6666662	272	0.100169
chr1	6669842	6670477	636	0.118259
chr1	6676494	6679038	2545	0.107583
chr1	6682385	6684360	1976	0.0888185
chr1	6684663	6684765	103	0.101604
chr1	6692262	6692899	638	0.0920685
chr1	6693290	6693694	405	0.0696826
chr1	6694119	6695112	994	0.0746771
chr1	6696343	6696844	502	0.0828069
chr1	6697199	6697844	646	0.085519
chr1	6699949	6701183	1235	0.062329
chr1	6709725	6709985	261	0.0747042
chr1	6710498	6710671	174	0.113437
chr1	6711103	6711607	505	0.0698816
chr1	6711984	6712377	394	0.0638032
chr1	6712688	6713439	752	0.0800222
chr1	6724146	6725241	1096	0.07821
chr1	6725781	6726068	288	0.0732748
chr1	6728879	6728984	106	0.0554439
chr1	6729671	6730036	366	0.0654316
chr1	6731859	6731878	20	0.0753805
chr1	6733809	6734020	212	0.100526
chr1	6734348	6734649	302	0.0758276
chr1	6748824	6750167	1344	0.0901556
chr1	6753767	6754800	1034	0.0865482
chr1	6758138	6758449	312	0.0578366
chr1	6762215	6762627	413	0.0798181
chr1	6771918	6772149	232	0.0547447
chr1	6801395	6801718	324	0.0907783
chr1	6803243	6804006	764	0.109756
chr1	6815071	6815083	13	0.0621797
chr1	6819253	6819350	98	0.0777023
chr1	6820200	6820516	317	0.0762695
chr1	6824047	6824640	594	0.0705669
chr1	6828228	6828781	554	0.0612958
chr1	6843368	6843394	27	0.15395
chr1	6846714	6847481	768	0.11154
chr1	6847783	6848921	1139	0.0736957
chr1	6852844	6853246	403	0.113466
chr1	6856827	6857416	590	0.086303
chr1	6859896	6860339	444	0.110134
chr1	6862961	6863377	417	0.0789018
chr1	6866967	6867152	186	0.124792
chr1	6868045	6868889	845	0.1416
chr1	6869376	6869440	65	0.123007
chr1	6869820	6871175	1356	0.0916309
chr1	6871632	6872429	798	0.0988532
chr1	6876457	6876884	428	0.108845
chr1	6877627	6878124	498	0.119183
chr1	6887059	6887300	242	0.138441
chr1	6887648	6888169	522	0.112717
chr1	6893955	6894097	143	0.118547
chr1	6894612	6895508	897	0.112501
chr1	6896381	6897665	1285	0.0617225
chr1	6901272	6902711	1440	0.0710088
chr1	6903651	6903921	271	0.063506
chr1	6911159	6911249	91	0.0692575
chr1	6912775	6913044	270	0.0827335
chr1	6915405	6916473	1069	0.0615315
chr1	6916923	6918100	1178	0.0814723
chr1	6919408	6919741	334	0.126365
chr1	6921307	6921943	637	0.0686806
chr1	6922312	6922442	131	0.0609233
chr1	6922805	6923307	503	0.0603873
chr1	6923614	6923659	46	0.060838
chr1	6924379	6925154	776	0.0538898
chr1	6928144	6928300	157	0.114493
chr1	6929820	6929898	79	0.155788
chr1	6934269	6934981	713	0.0530692
chr1	6938543	6939350	808	0.0676519
chr1	6939813	6940397	585	0.0868773
chr1	6940745	6940949	205	0.0825167
chr1	6941387	6941765	379	0.0685715
chr1	6943243	6943779	537	0.06823
chr1	6945897	6946178	282	0.0604907
chr1	6947911	6948554	644	0.0596289
chr1	6955017	6955215	199	0.0733567
chr1	6955580	6956797	1218	0.0829448
chr1	6970221	6972901	2681	0.0704198
chr1	6975954	6976354	401	0.0528367
chr1	6982618	6984885	2268	0.0726318
chr1	6985605	6986261	657	0.0574844
chr1	6993338	6994822	1485	0.0779419
chr1	7014036	7015170	1135	0.058043
chr1	7016075	7017855	1781	0.0714886
chr1	7021241	7021935	695	0.114938
chr1	7023625	7023732	108	0.0597306
chr1	7031632	7034182	2551	0.0636599
chr1	7034601	7034844	244	0.0570044
chr1	7038079	7038431	353	0.0629883
chr1	7038807	7039323	517	0.0605543
chr1	7044006	7045155	1150	0.0700708
chr1	7080131	7080897	767	0.0569284
chr1	7086983	7089299	2317	0.0778593
chr1	7102326	7102885	560	0.0723939
chr1	7122267	7122726	460	0.0721305
chr1	7158564	7159099	536	0.106373
chr1	7159402	7160521	1120	0.106489
chr1	7162238	7164030	1793	0.0818562
chr1	7168984	7171049	2066	0.0787091
chr1	7172561	7174591	2031	0.079687
chr1	7177682	7178162	481	0.0743
chr1	7180361	7184026	3666	0.0612267
chr1	7187191	7187209	19	0.0818648
chr1	7187516	7188421	906	0.0810016
chr1	7196929	7197954	1026	0.0596008
chr1	7199569	7199884	316	0.0707048
chr1	7200853	7202089	1237	0.0602763
chr1	7205162	7206775	1614	0.0770795
chr1	7207218	7207609	392	0.0680721
chr1	7208112	7208694	583	0.0916522
chr1	7209044	7209578	535	0.0953172
chr1	7210186	7212365	2180	0.111305
chr1	7213552	7216637	3086	0.0663305
chr1	7217941	7217947	7	0.0539264
chr1	7266996	7267385	390	0.0746752
chr1	7278273	7279330	1058	0.106301
chr1	7296546	7297693	1148	0.0696011
chr1	7349568	7349937	370	0.054002
chr1	7350251	7350893	643	0.0568812
chr1	7387023	7387242	220	0.0692659
chr1	7393601	7394064	464	0.0539693
chr1	7400208	7402409	2202	0.089852
chr1	7402983	7403095	113	0.052303
chr1	7404655	7405100	446	0.0651272
chr1	7405510	7405924	415	0.105887
chr1	7406440	7408018	1579	0.0875588
chr1	7422595	7424290	1696	0.0688486
chr1	7424669	7424750	82	0.0533055
chr1	7426605	7427763	1159	0.0686549
chr1	7428652	7430685	2034	0.0639953
chr1	7438071	7439064	994	0.0734426
chr1	7443222	7443762	541	0.0560626
chr1	7444896	7445180	285	0.0531113
chr1	7450006	7451733	1728	0.0594809
chr1	7468687	7470082	1396	0.0698284
chr1	7479984	7480623	640	0.056782
chr1	7483100	7483296	197	0.058736
chr1	7483601	7484204	604	0.0599763
chr1	7487012	7487823	812	0.0597841
chr1	7505378	7505490	113	0.0571291
chr1	7508146	7509501	1356	0.0629567
chr1	7513018	7513570	553	0.0664898
chr1	7513872	7516143	2272	0.0855811
chr1	7516456	7516974	519	0.0955656
chr1	7518080	7519003	924	0.0640181
chr1	7531931	7534159	2229	0.0643663
chr1	7539260	7540933	1674	0.0616252
chr1	7546600	7547269	670	0.0633814
chr1	7548299	7548562	264	0.0566432
chr1	7553810	7554057	248	0.0560899
chr1	7560779	7561531	753	0.0812052
chr1	7561839	7562489	651	0.084026
chr1	7564324	7565394	1071	0.0589214
chr1	7570583	7571308	726	0.0611951
chr1	7584529	7584852	324	0.0579636
chr1	7588292	7588732	441	0.0570459
chr1	7595124	7596432	1309	0.0816093
chr1	7598031	7601379	3349	0.106862
chr1	7601794	7601925	132	0.0622679
chr1	7610372	7611749	1378	0.122595
chr1	7612135	7613077	943	0.0829183
chr1	7613922	7615016	1095	0.0723371
chr1	7618547	7620225	1679	0.060953
chr1	7621606	7622629	1024	0.0701496
chr1	7625069	7626930	1862	0.0646623
chr1	7628942	7629232	291	0.0635816
chr1	7629862	7630534	673	0.145828
chr1	7630836	7631225	390	0.179404
chr1	7632747	7633864	1118	0.0909494
chr1	7634207	7635449	1243	0.123183
chr1	7635895	7638330	2436	0.08804
chr1	7640652	7642460	1809	0.0591466
chr1	7646235	7649190	2956	0.0616633
chr1	7650502	7651198	697	0.0720925
chr1	7651700	7652434	735	0.0818584
chr1	7666327	7667122	796	0.0592439
chr1	7668853	7669438	586	0.0691461
chr1	7673024	7673723	700	0.0571814
chr1	7680647	7682788	2142	0.0876614
chr1	7684197	7684980	784	0.0605347
chr1	7688219	7689128	910	0.058986
chr1	7692490	7693556	1067	0.0681587
chr1	7695663	7696498	836	0.0745853
chr1	7705228	7706510	1283	0.101551
chr1	7707035	7707290	256	0.0973359
chr1	7709608	7710083	476	0.0612515
chr1	7717109	7718582	1474	0.0628122
chr1	7720892	7722721	1830	0.0658796
chr1	7731233	7731576	344	0.0637624
chr1	7735156	7735380	225	0.0618081
chr1	7738278	7740022	1745	0.0847144
chr1	7741286	7742879	1594	0.0777387
chr1	7744181	7745032	852	0.0583778
chr1	7746188	7748595	2408	0.0604714
chr1	7749693	7750441	749	0.0578374
chr1	7751988	7753153	1166	0.0610537
chr1	7753605	7753919	315	0.0576483
chr1	7756853	7758906	2054	0.0619192
chr1	7767223	7768108	886	0.0801584
chr1	7786038	7786408	371	0.0600713
chr1	7787461	7788090	630	0.067746
chr1	7796479	7796948	470	0.0563127
chr1	7805917	7806172	256	0.0543921
chr1	7820987	7821353	367	0.0600548
chr1	7840968	7843260	2293	0.122012
chr1	7845446	7846301	856	0.112807
chr1	7846984	7847480	497	0.136588
chr1	7850039	7850250	212	0.0853617
chr1	7852270	7852910	641	0.0842632
chr1	7856654	7857432	779	0.0676216
chr1	7864743	7864873	131	0.0750566
chr1	7870598	7870723	126	0.0871286
chr1	7871560	7871928	369	0.123424
chr1	7876913	7877775	863	0.0809978
chr1	7884824	7885704	881	0.095614
chr1	7886044	7886146	103	0.0850237
chr1	7886603	7886774	172	0.0679004
chr1	7887205	7887334	130	0.0602337
chr1	7887598	7888280	683	0.0651812
chr1	7889941	7890627	687	0.152676
chr1	7900947	7901667	721	0.0919451
chr1	7901977	7902290	314	0.108428
chr1	7962026	7962613	588	0.0551107
chr1	7963477	7964641	1165	0.107113
chr1	7965087	7965588	502	0.0725231
chr1	7966976	7967594	619	0.0612465
chr1	7972393	7972958	566	0.0623933
chr1	7981988	7982597	610	0.0726838
chr1	7998823	7999117	295	0.0805621
chr1	7999600	7999876	277	0.108193
chr1	8023404	8023850	447	0.0890928
chr1	8024168	8025395	1228	0.133003
chr1	8032175	8032537	363	0.0842926
chr1	8039858	8039954	97	0.109084
chr1	8040390	8041692	1303	0.0831055
chr1	8043198	8045218	2021	0.0866161
chr1	8045835	8046949	1115	0.124331
chr1	8069134	8070448	1315	0.138465
chr1	8071437	8071537	101	0.160609
chr1	8072453	8072927	475	0.149655
chr1	8073301	8075609	2309	0.118362
chr1	8093353	8093769	417	0.103866
chr1	8108336	8108753	418	0.078586
chr1	8116109	8116428	320	0.087606
chr1	8117607	8117673	67	0.0759102
chr1	8122771	8123147	377	0.0801272
chr1	8123932	8124000	69	0.0958857
chr1	8132277	8132573	297	0.0987728
chr1	8134218	8134474	257	0.0787252
chr1	8135843	8136022	180	0.0752208
chr1	8137399	8139248	1850	0.124227
chr1	8139551	8139699	149	0.0673703
chr1	8141699	8142190	492	0.0778322
chr1	8143526	8144388	863	0.107151
chr1	8144995	8145250	256	0.0788746
chr1	8146740	8147043	304	0.0737859
chr1	8151232	8151711	480	0.0807537
chr1	8152465	8153156	692	0.103283
chr1	8153607	8154706	1100	0.121765
chr1	8157389	8157464	76	0.0773742
chr1	8160743	8161099	357	0.097873
chr1	8161523	8161623	101	0.103977
chr1	8164224	8164756	533	0.0612331
chr1	8168940	8170007	1068	0.0681653
chr1	8172970	8173451	482	0.0628687
chr1	8173838	8174981	1144	0.0832507
chr1	8175289	8176636	1348	0.10103
chr1	8178116	8178788	673	0.102263
chr1	8179877	8181839	1963	0.0940755
chr1	8185663	8187293	1631	0.0771626
chr1	8194499	8196599	2101	0.129069
chr1	8196982	8198118	1137	0.0932044
chr1	8202344	8202460	117	0.133894
chr1	8203347	8204252	906	0.104181
chr1	8205373	8206629	1257	0.0707394
chr1	8207824	8208588	765	0.0596848
chr1	8211736	8212177	442	0.071992
chr1	8216045	8216405	361	0.0799141
chr1	8216744	8217396	653	0.0728916
chr1	8219251	8220133	883	0.0600518
chr1	8221568	8223582	2015	0.101201
chr1	8225598	8226880	1283	0.104297
chr1	8227917	8228566	650	0.0980661
chr1	8232022	8232637	616	0.0873745
chr1	8236962	8237201	240	0.075943
chr1	8245133	8245384	252	0.0700596
chr1	8245686	8246212	527	0.088318
chr1	8251462	8251838	377	0.0786834
chr1	8252188	8252324	137	0.0687441
chr1	8252786	8253013	228	0.100738
chr1	8254076	8254885	810	0.0815859
chr1	8257660	8258435	776	0.0969739
chr1	8258894	8258948	55	0.0801592
chr1	8259317	8259710	394	0.0775235
chr1	8260137	8262126	1990	0.123116
chr1	8263331	8265140	1810	0.101959
chr1	8265679	8267592	1914	0.0918075
chr1	8267942	8270256	2315	0.0726862
chr1	8271483	8275030	3548	0.138145
chr1	8275469	8275974	506	0.119881
chr1	8277895	8278064	170	0.111279
chr1	8278473	8279335	863	0.103936
chr1	8285091	8286299	1209	0.116323
chr1	8286601	8287633	1033	0.109788
chr1	8290216	8293120	2905	0.0906844
chr1	8293435	8293555	121	0.0699749
chr1	8298924	8299960	1037	0.107402
chr1	8301170	8302190	1021	0.163445
chr1	8316446	8318194	1749	0.128508
chr1	8318502	8318619	118	0.0879199
chr1	8322058	8322378	321	0.166733
chr1	8324717	8325869	1153	0.12745
chr1	8330626	8331646	1021	0.0797161
chr1	8332231	8332475	245	0.10794
chr1	8333173	8333417	245	0.140854
chr1	8334527	8335242	716	0.104606
chr1	8336206	8336812	607	0.0695004
chr1	8337133	8338601	1469	0.0968344
chr1	8338933	8339225	293	0.148647
chr1	8341071	8344416	3346	0.111118
chr1	8349964	8350023	60	0.112901
chr1	8362397	8362868	472	0.0622385
chr1	8367554	8368465	912	0.087542
chr1	8374631	8375293	663	0.0715553
chr1	8378647	8378922	276	0.0732588
chr1	8384350	8384785	436	0.0649186
chr1	8401911	8402851	941	0.12349
chr1	8406852	8408070	1219	0.0981325
chr1	8410650	8412107	1458	0.105681
chr1	8413490	8414393	904	0.091978
chr1	8414749	8414795	47	0.0953228
chr1	8415129	8418104	2976	0.0933506
chr1	8418834	8420324	1491	0.071178
chr1	8421762	8424295	2534	0.12322
chr1	8424623	8425334	712	0.119509
chr1	8425992	8426920	929	0.072669
chr1	8427379	8429247	1869	0.119216
chr1	8430139	8430682	544	0.109846
chr1	8431105	8431290	186	0.130848
chr1	8431607	8432289	683	0.194979
chr1	8434605	8435310	706	0.148778
chr1	8436181	8436918	738	0.165152
chr1	8437779	8437916	138	0.131241
chr1	8438380	8440421	2042	0.147018
chr1	8442032	8443648	1617	0.0903411
chr1	8444223	8445793	1571	0.175437
chr1	8449393	8450525	1133	0.151374
chr1	8450904	8451370	467	0.200963
chr1	8452692	8453021	330	0.222377
chr1	8457037	8457417	381	0.158098
chr1	8458513	8458927	415	0.152232
chr1	8460801	8460946	146	0.130267
chr1	8461295	8461617	323	0.130693
chr1	8462213	8462966	754	0.125878
chr1	8464175	8464227	53	0.136122
chr1	8464599	8465139	541	0.145598
chr1	8465642	8466331	690	0.130221
chr1	8467264	8467742	479	0.137204
chr1	8470272	8470931	660	0.0861435
chr1	8472381	8472781	401	0.139845
chr1	8474324	8474610	287	0.135663
chr1	8475606	8476373	768	0.131556
chr1	8477723	8478577	855	0.173453
chr1	8478999	8479938	940	0.0982468
chr1	8484644	8484708	65	0.0838096
chr1	8485011	8486242	1232	0.181364
chr1	8489029	8489559	531	0.108897
chr1	8490628	8491313	686	0.142813
chr1	8491951	8492226	276	0.139489
chr1	8497240	8497713	474	0.0796357
chr1	8510149	8511218	1070	0.0587239
chr1	8512945	8513596	652	0.0868958
chr1	8514340	8514604	265	0.080551
chr1	8515161	8515552	392	0.0623644
chr1	8517913	8518751	839	0.077886
chr1	8522398	8522802	405	0.0961381
chr1	8523537	8524546	1010	0.113075
chr1	8529406	8530253	848	0.0957685
chr1	8530604	8531687	1084	0.0805254
chr1	8534565	8534797	233	0.156976
chr1	8535984	8536467	484	0.158504
chr1	8554402	8554512	111	0.0823894
chr1	8555029	8555213	185	0.0819211
chr1	8555651	8556816	1166	0.0988353
chr1	8559382	8559505	124	0.132638
chr1	8567024	8567497	474	0.10537
chr1	8568166	8569508	1343	0.0844062
chr1	8574471	8574526	56	0.064151
chr1	8575155	8575477	323	0.103973
chr1	8575972	8576265	294	0.123523
chr1	8577901	8578712	812	0.108439
chr1	8580398	8580686	289	0.162662
chr1	8593108	8593495	388	0.103837
chr1	8596355	8596585	231	0.100214
chr1	8596992	8597219	228	0.114608
chr1	8599402	8600311	910	0.120961
chr1	8602166	8602649	484	0.115718
chr1	8605176	8605379	204	0.0979933
chr1	8612910	8613500	591	0.0650049
chr1	8613962	8614473	512	0.113999
chr1	8616394	8616733	340	0.120768
chr1	8617214	8617670	457	0.104004
chr1	8619110	8619195	86	0.131878
chr1	8619816	8620813	998	0.127885
chr1	8621431	8621975	545	0.132716
chr1	8622659	8623358	700	0.143729
chr1	8626872	8627143	272	0.0695685
chr1	8628315	8628446	132	0.0787008
chr1	8629233	8629636	404	0.0899949
chr1	8634734	8634828	95	0.112771
chr1	8639192	8639800	609	0.0838263
chr1	8640759	8640840	82	0.0922342
chr1	8642837	8643672	836	0.126437
chr1	8644401	8644567	167	0.13523
chr1	8650891	8651282	392	0.124513
chr1	8652350	8652796	447	0.102355
chr1	8653137	8653266	130	0.0807422
chr1	8653771	8654392	622	0.0668554
chr1	8656919	8657199	281	0.133975
chr1	8657622	8657761	140	0.152287
chr1	8658084	8659420	1337	0.156941
chr1	8661934	8662177	244	0.118871
chr1	8663443	8663931	489	0.149381
chr1	8664247	8664559	313	0.164087
chr1	8665212	8665529	318	0.110618
chr1	8667137	8667303	167	0.0782355
chr1	8668049	8668276	228	0.119023
chr1	8669373	8670358	986	0.138793
chr1	8699121	8699445	325	0.126832
chr1	8704413	8704452	40	0.121456
chr1	8705392	8705913	522	0.148896
chr1	8706248	8706459	212	0.170204
chr1	8706814	8707314	501	0.181794
chr1	8712167	8713188	1022	0.139101
chr1	8720316	8720809	494	0.120948
chr1	8721480	8721858	379	0.10921
chr1	8722464	8722872	409	0.10409
chr1	8724999	8725643	645	0.133259
chr1	8729615	8729751	137	0.178522
chr1	8730672	8731316	645	0.142927
chr1	8732054	8732379	326	0.126048
chr1	8737463	8737809	347	0.113576
chr1	8738581	8738651	71	0.129051
chr1	8739416	8740812	1397	0.117683
chr1	8746384	8747293	910	0.118042
chr1	8748227	8748741	515	0.193344
chr1	8750065	8750572	508	0.112318
chr1	8759795	8760091	297	0.108752
chr1	8767172	8768798	1627	0.1278
chr1	8769454	8769511	58	0.099064
chr1	8780615	8782427	1813	0.12192
chr1	8782866	8783097	232	0.135491
chr1	8796555	8796561	7	0.145749
chr1	8798218	8798717	500	0.173669
chr1	8799464	8799703	240	0.172191
chr1	8802449	8802787	339	0.120949
chr1	8803171	8803609	439	0.145142
chr1	8804400	8804783	384	0.170583
chr1	8805180	8806019	840	0.137134
chr1	8810306	8810479	174	0.102708
chr1	8822314	8822759	446	0.0838934
chr1	8823993	8824632	640	0.0809826
chr1	8829485	8829878	394	0.0786569
chr1	8836160	8836846	687	0.0867557
chr1	8839197	8839312	116	0.0813698
chr1	8841006	8841134	129	0.0871407
chr1	8842327	8842692	366	0.0904675
chr1	8843629	8844259	631	0.100181
chr1	8848701	8848947	247	0.0895247
chr1	8849501	8850234	734	0.110771
chr1	8852592	8852990	399	0.0930171
chr1	8854222	8854411	190	0.0629488
chr1	8854753	8855423	671	0.0640739
chr1	8859648	8859901	254	0.0643037
chr1	8860507	8860720	214	0.0895106
chr1	8861055	8861619	565	0.0668834
chr1	8863190	8863938	749	0.109189
chr1	8866206	8866801	596	0.0778002
chr1	8867222	8867446	225	0.059633
chr1	8870212	8870350	139	0.121504
chr1	8871653	8872704	1052	0.142078
chr1	8879655	8880201	547	0.122097
chr1	8894556	8894638	83	0.0736812
chr1	8916198	8917141	944	0.0769649
chr1	8919275	8919955	681	0.12872
chr1	8920368	8921735	1368	0.117622
chr1	8922347	8925473	3127	0.0675584
chr1	8925892	8927327	1436	0.0809095
chr1	8928616	8929580	965	0.132357
chr1	8929919	8931337	1419	0.0948352
chr1	8934685	8936178	1494	0.151464
chr1	8936661	8937579	919	0.116835
chr1	8940866	8941182	317	0.13265
chr1	8943443	8945472	2030	0.0710062
chr1	8948335	8948497	163	0.0618285
chr1	8952186	8952456	271	0.12623
chr1	8963950	8964933	984	0.0664773
chr1	8971254	8972236	983	0.0816629
chr1	8982161	8982664	504	0.0583069
chr1	8983077	8983536	460	0.0649794
chr1	8991611	8991873	263	0.0875964
chr1	8992548	8992797	250	0.0634436
chr1	9002213	9002528	316	0.0565729
chr1	9007142	9007885	744	0.0975831
chr1	9023964	9024289	326	0.0599022
chr1	9030806	9031271	466	0.0854894
chr1	9036478	9037283	806	0.0655929
chr1	9049987	9050505	519	0.0629309
chr1	9051283	9052072	790	0.0648741
chr1	9055107	9055493	387	0.0693681
chr1	9057088	9057270	183	0.0612952
chr1	9057745	9057752	8	0.0776101
chr1	9064179	9064867	689	0.0679559
chr1	9067954	9068317	364	0.0561878
chr1	9096530	9096674	145	0.0532766
chr1	9103238	9104070	833	0.0599818
chr1	9121415	9122528	1114	0.166875
chr1	9122972	9123462	491	0.118418
chr1	9124043	9124838	796	0.0813065
chr1	9125390	9125893	504	0.080956
chr1	9127184	9127976	793	0.0625009
chr1	9129487	9131028	1542	0.0943187
chr1	9135330	9135741	412	0.0964527
chr1	9138322	9139499	1178	0.0754282
chr1	9140144	9140563	420	0.0776512
chr1	9144420	9145274	855	0.0797359
chr1	9158320	9159375	1056	0.0903967
chr1	9162823	9163245	423	0.0614687
chr1	9165209	9165478	270	0.0523988
chr1	9167403	9168600	1198	0.081711
chr1	9170630	9172831	2202	0.0714243
chr1	9173656	9173730	75	0.0716877
chr1	9174293	9174840	548	0.102256
chr1	9179387	9180076	690	0.109937
chr1	9181873	9182462	590	0.0843378
chr1	9185659	9185846	188	0.0802258
chr1	9188171	9188333	163	0.0666123
chr1	9190027	9190884	858	0.100733
chr1	9196528	9197554	1027	0.0656926
chr1	9201691	9202008	318	0.0757762
chr1	9202585	9203615	1031	0.0749269
chr1	9206901	9207339	439	0.0711377
chr1	9207854	9207944	91	0.132482
chr1	9209944	9212435	2492	0.0975891
chr1	9213884	9214460	577	0.117329
chr1	9216127	9216448	322	0.0977477
chr1	9216911	9218128	1218	0.0861469
chr1	9219251	9219401	151	0.0971687
chr1	9220325	9221747	1423	0.104427
chr1	9224683	9225830	1148	0.107271
chr1	9226351	9227097	747	0.105781
chr1	9228591	9230317	1727	0.10263
chr1	9233069	9233589	521	0.0909323
chr1	9233980	9235903	1924	0.104574
chr1	9236263	9236410	148	0.0676258
chr1	9238006	9240739	2734	0.120296
chr1	9243300	9245078	1779	0.122147
chr1	9245488	9245757	270	0.0990523
chr1	9246693	9247046	354	0.079522
chr1	9247581	9248002	422	0.0897751
chr1	9248442	9249182	741	0.0710062
chr1	9252607	9253654	1048	0.0898675
chr1	9254699	9255032	334	0.0610879
chr1	9255394	9256255	862	0.0934071
chr1	9259128	9260305	1178	0.0817608
chr1	9264346	9265008	663	0.0690829
chr1	9267115	9267920	806	0.0826176
chr1	9275364	9276508	1145	0.0603984
chr1	9277278	9278095	818	0.0759676
chr1	9285554	9286437	884	0.0940677
chr1	9286768	9287485	718	0.106388
chr1	9290936	9292572	1637	0.0937128
chr1	9295776	9295973	198	0.240703
chr1	9296338	9297208	871	0.116004
chr1	9297571	9298623	1053	0.10454
chr1	9303989	9305916	1928	0.0788143
chr1	9307001	9307873	873	0.0910249
chr1	9311640	9312182	543	0.0805336
chr1	9312662	9314142	1481	0.120151
chr1	9314588	9315015	428	0.147784
chr1	9315727	9316055	329	0.113394
chr1	9316444	9317009	566	0.0986409
chr1	9317487	9318556	1070	0.113842
chr1	9320893	9323957	3065	0.0745169
chr1	9324337	9325097	761	0.0626285
chr1	9325790	9330906	5117	0.101643
chr1	9331272	9333841	2570	0.107354
chr1	9335069	9336446	1378	0.137796
chr1	9336944	9337405	462	0.0966168
chr1	9338265	9340519	2255	0.0868108
chr1	9350198	9351039	842	0.0950158
chr1	9351595	9352219	625	0.11264
chr1	9354516	9356560	2045	0.122542
chr1	9356992	9358160	1169	0.0743791
chr1	9359936	9363073	3138	0.105484
chr1	9363411	9365564	2154	0.0794801
chr1	9366049	9369639	3591	0.0693427
chr1	9370056	9370473	418	0.0996743
chr1	9371088	9372868	1781	0.102646
chr1	9373177	9378974	5798	0.11065
chr1	9379352	9390297	10946	0.0937513
chr1	9390638	9391347	710	0.136073
chr1	9391669	9393203	1535	0.0958596
chr1	9393669	9393985	317	0.0885572
chr1	9394559	9394940	382	0.07169
chr1	9395589	9395625	37	0.084788
chr1	9396536	9399114	2579	0.067693
chr1	9399769	9402920	3152	0.100753
chr1	9404136	9407125	2990	0.10779
chr1	9408255	9411934	3680	0.0780601
chr1	9412278	9416003	3726	0.0833065
chr1	9417530	9419388	1859	0.0778242
chr1	9419979	9423691	3713	0.0964549
chr1	9425822	9427639	1818	0.0687118
chr1	9429394	9430284	891	0.0816502
chr1	9430596	9432866	2271	0.0881087
chr1	9433204	9434096	893	0.0672167
chr1	9435531	9436894	1364	0.0870614
chr1	9444093	9445257	1165	0.0834279
chr1	9445600	9446136	537	0.0816829
chr1	9447382	9447875	494	0.0650994
chr1	9455381	9456455	1075	0.0789464
chr1	9458957	9461407	2451	0.102827
chr1	9463873	9464735	863	0.061596
chr1	9466251	9466899	649	0.0654759
chr1	9481670	9481974	305	0.121521
chr1	9482279	9482572	294	0.0646444
chr1	9488060	9488706	647	0.12421
chr1	9492569	9495481	2913	0.117156
chr1	9500336	9501929	1594	0.0848227
chr1	9504029	9504335	307	0.140895
chr1	9504662	9504993	332	0.079594
chr1	9506268	9507057	790	0.100859
chr1	9507372	9507892	521	0.111488
chr1	9508293	9510193	1901	0.103491
chr1	9511311	9513466	2156	0.0828938
chr1	9513856	9514932	1077	0.102951
chr1	9515401	9518684	3284	0.111513
chr1	9521512	9522259	748	0.0719313
chr1	9524159	9524626	468	0.0968755
chr1	9525989	9527532	1544	0.0837661
chr1	9532382	9534409	2028	0.0635068
chr1	9534831	9534888	58	0.0554154
chr1	9535203	9536091	889	0.0870553
chr1	9536397	9537309	913	0.120961
chr1	9537624	9537762	139	0.082594
chr1	9538115	9538880	766	0.0608462
chr1	9539198	9539750	553	0.111415
chr1	9540073	9540465	393	0.109316
chr1	9541173	9542253	1081	0.0760848
chr1	9542676	9543763	1088	0.0870564
chr1	9547238	9547299	62	0.0600329
chr1	9547612	9547839	228	0.0940729
chr1	9548163	9548869	707	0.0955152
chr1	9549207	9549478	272	0.0640053
chr1	9550049	9550373	325	0.0851745
chr1	9550674	9551033	360	0.126474
chr1	9564385	9564928	544	0.0855684
chr1	9565292	9565943	652	0.0840959
chr1	9566331	9566738	408	0.0823821
chr1	9570277	9570505	229	0.0757906
chr1	9581682	9581813	132	0.0663271
chr1	9586646	9588851	2206	0.086433
chr1	9592541	9593407	867	0.109308
chr1	9597336	9597450	115	0.149678
chr1	9600546	9600885	340	0.0903194
chr1	9601509	9601645	137	0.140014
chr1	9602106	9603444	1339	0.158355
chr1	9606531	9607237	707	0.15528
chr1	9608012	9608367	356	0.155363
chr1	9608828	9609258	431	0.140468
chr1	9613570	9614113	544	0.0999758
chr1	9615455	9615685	231	0.0936328
chr1	9616170	9616255	86	0.121598
chr1	9618127	9619387	1261	0.126375
chr1	9625084	9626037	954	0.144239
chr1	9628631	9629029	399	0.0792678
chr1	9633581	9633800	220	0.0996411
chr1	9638265	9638923	659	0.0660994
chr1	9640337	9640520	184	0.0583541
chr1	9642017	9642377	361	0.117578
chr1	9644757	9645101	345	0.0652343
chr1	9645445	9645785	341	0.0666251
chr1	9648038	9648398	361	0.103948
chr1	9649757	9654685	4929	0.104142
chr1	9655630	9656675	1046	0.0587847
chr1	9660871	9661456	586	0.0604757
chr1	9666693	9667486	794	0.0686588
chr1	9670134	9670847	714	0.0662687
chr1	9671004	9674172	3169	0.0713588
chr1	9680978	9681043	66	0.0680769
chr1	9684497	9684582	86	0.0788103
chr1	9688613	9689376	764	0.0661272
chr1	9693198	9694648	1451	0.081671
chr1	9703942	9704309	368	0.144907
chr1	9705002	9705106	105	0.0905364
chr1	9717182	9717746	565	0.0796777
chr1	9727723	9727733	11	0.0607352
chr1	9740837	9741057	221	0.0854933
chr1	9741495	9742587	1093	0.0675506
chr1	9743538	9744126	589	0.0552797
chr1	9750145	9750991	847	0.0711657
chr1	9751353	9752269	917	0.0981179
chr1	9753668	9754836	1169	0.0642145
chr1	9760298	9760354	57	0.0535089
chr1	9760424	9761457	1034	0.0592875
chr1	9765993	9766465	473	0.0629327
chr1	9770058	9770508	451	0.056326
chr1	9779057	9779444	388	0.0769899
chr1	9781296	9782591	1296	0.0882823
chr1	9784512	9785930	1419	0.0883267
chr1	9795769	9796011	243	0.0547089
chr1	9803910	9804054	145	0.0537692
chr1	9807825	9807831	7	0.0574196
chr1	9812554	9812906	353	0.0626219
chr1	9826704	9827366	663	0.0717289
chr1	9828009	9828263	255	0.100227
chr1	9834727	9836696	1970	0.0806476
chr1	9837881	9838602	722	0.074896
chr1	9844090	9844683	594	0.143723
chr1	9845345	9848394	3050	0.0696021
chr1	9848920	9849669	750	0.0802156
chr1	9851887	9854722	2836	0.0800975
chr1	9855513	9855739	227	0.0982029
chr1	9857559	9859421	1863	0.0652805
chr1	9866262	9866665	404	0.0717452
chr1	9868671	9869667	997	0.0601781
chr1	9884940	9885630	691	0.0683069
chr1	9887620	9888619	1000	0.093208
chr1	9890152	9890158	7	0.0642322
chr1	9890511	9891465	955	0.0716151
chr1	9895306	9896792	1487	0.0835753
chr1	9902048	9905223	3176	0.0737707
chr1	9906597	9907505	909	0.083116
chr1	9909812	9910710	899	0.0552398
chr1	9917264	9917853	590	0.0714306
chr1	9918169	9918762	594	0.0635922
chr1	9919299	9919845	547	0.0701921
chr1	9920243	9920419	177	0.0801442
chr1	9920833	9922117	1285	0.0810377
chr1	9922430	9923993	1564	0.079682
chr1	9925345	9927641	2297	0.0774737
chr1	9928071	9928402	332	0.055002
chr1	9929966	9930752	787	0.0576437
chr1	9932825	9933950	1126	0.0689305
chr1	9942300	9942555	256	0.0854452
chr1	9942884	9943299	416	0.0608417
chr1	9944121	9945729	1609	0.0652703
chr1	9947918	9951704	3787	0.0852021
chr1	9952153	9952218	66	0.0860556
chr1	9952758	9953082	325	0.0615645
chr1	9953301	9953550	250	0.0611218
chr1	9954157	9954444	288	0.0869172
chr1	9960353	9961127	775	0.0602329
chr1	9961570	9963153	1584	0.131284
chr1	9963711	9965462	1752	0.0639312
chr1	9965767	9965911	145	0.0733126
chr1	9966343	9966381	39	0.090223
chr1	9966870	9968081	1212	0.106756
chr1	9968699	9969414	716	0.0831355
chr1	9974217	9974355	139	0.109139
chr1	9988026	9988091	66	0.0624338
chr1	9996906	9996917	12	0.0627269
chr1	9999765	10000072	308	0.0625715
chr1	10004298	10004728	431	0.133967
chr1	10006488	10006802	315	0.0934489
chr1	10015070	10015188	119	0.0686065
chr1	10017376	10017503	128	0.0637559
chr1	10020164	10021434	1271	0.0874255
chr1	10027284	10027940	657	0.0782166
chr1	10028409	10028421	13	0.0848856
chr1	10028984	10029207	224	0.0639971
chr1	10035584	10036564	981	0.0795211
chr1	10037232	10037341	110	0.0814588
chr1	10037646	10038180	535	0.0728053
chr1	10045585	10046896	1312	0.100539
chr1	10047295	10047692	398	0.0739864
chr1	10061071	10061771	701	0.0678803
chr1	10074734	10076014	1281	0.0737125
chr1	10077788	10079083	1296	0.0830502
chr1	10081165	10081349	185	0.0979728
chr1	10086617	10086987	371	0.098142
chr1	10087924	10088085	162	0.0812858
chr1	10097938	10098060	123	0.0651755
chr1	10098593	10098946	354	0.0593518
chr1	10100193	10100967	775	0.0758496
chr1	10101672	10101786	115	0.107464
chr1	10102095	10102909	815	0.131936
chr1	10104354	10104784	431	0.0710419
chr1	10105753	10107275	1523	0.130059
chr1	10108202	10108862	661	0.144662
chr1	10109302	10109528	227	0.142791
chr1	10111338	10111770	433	0.130303
chr1	10112490	10113941	1452	0.0907612
chr1	10117577	10118183	607	0.156247
chr1	10118719	10120545	1827	0.102928
chr1	10121557	10121792	236	0.106041
chr1	10123353	10123737	385	0.0784816
chr1	10124049	10124680	632	0.0949957
chr1	10125112	10125723	612	0.113396
chr1	10126237	10126320	84	0.166492
chr1	10128704	10130098	1395	0.0915638
chr1	10131825	10132189	365	0.0841545
chr1	10133481	10134710	1230	0.0820045
chr1	10140131	10140245	115	0.101141
chr1	10141551	10142429	879	0.117162
chr1	10144002	10145454	1453	0.0937747
chr1	10147019	10147191	173	0.0695484
chr1	10148720	10149529	810	0.0775571
chr1	10153775	10154042	268	0.096549
chr1	10162760	10163334	575	0.122431
chr1	10169180	10169453	274	0.118244
chr1	10169999	10170252	254	0.0802421
chr1	10170827	10171742	916	0.061241
chr1	10174908	10175717	810	0.0724171
chr1	10176226	10176596	371	0.089281
chr1	10188401	10188899	499	0.0896252
chr1	10189989	10190072	84	0.0682441
chr1	10190418	10191256	839	0.0889935
chr1	10191645	10192056	412	0.0668591
chr1	10212180	10212311	132	0.120408
chr1	10212850	10213745	896	0.108909
chr1	10214337	10214633	297	0.0793462
chr1	10219737	10220653	917	0.080785
chr1	10229032	10229800	769	0.116679
chr1	10241454	10242597	1144	0.0691779
chr1	10243356	10243892	537	0.0620332
chr1	10268390	10268834	445	0.0759753
chr1	10273916	10274229	314	0.166133
chr1	10275529	10275752	224	0.146613
chr1	10276442	10276969	528	0.138522
chr1	10279911	10280257	347	0.0969355
chr1	10281976	10282264	289	0.170706
chr1	10283897	10285435	1539	0.136249
chr1	10287370	10287758	389	0.126205
chr1	10289500	10289642	143	0.127243
chr1	10289976	10290381	406	0.129768
chr1	10290773	10291327	555	0.132191
chr1	10291784	10292025	242	0.11347
chr1	10293395	10293666	272	0.0913537
chr1	10293979	10294195	217	0.103892
chr1	10294712	10294815	104	0.124981
chr1	10295227	10295294	68	0.134245
chr1	10297703	10298176	474	0.0745901
chr1	10299062	10299258	197	0.100677
chr1	10300239	10300605	367	0.0998492
chr1	10302037	10303539	1503	0.076576
chr1	10307973	10308284	312	0.0987247
chr1	10308631	10308801	171	0.122694
chr1	10309645	10309831	187	0.128062
chr1	10310367	10310553	187	0.103203
chr1	10310870	10310960	91	0.0901921
chr1	10311518	10311787	270	0.0954165
chr1	10315296	10315420	125	0.0938528
chr1	10331599	10332091	493	0.113661
chr1	10344329	10344812	484	0.103867
chr1	10345530	10345824	295	0.127808
chr1	10351494	10351506	13	0.0638669
chr1	10356367	10357150	784	0.0664396
chr1	10359924	10360032	109	0.0693273
chr1	10369244	10369635	392	0.0960519
chr1	10370161	10370657	497	0.0912859
chr1	10371249	10371560	312	0.0982407
chr1	10372046	10372115	70	0.0980037
chr1	10382913	10383879	967	0.0703608
chr1	10384511	10384925	415	0.0725249
chr1	10386378	10387554	1177	0.0679076
chr1	10388306	10388741	436	0.128912
chr1	10400651	10400820	170	0.0616155
chr1	10404079	10404396	318	0.0688842
chr1	10404773	10404987	215	0.0682876
chr1	10405531	10405579	49	0.0695
chr1	10416142	10416422	281	0.0806797
chr1	10416992	10417148	157	0.0642913
chr1	10430042	10430422	381	0.0661402
chr1	10430825	10431223	399	0.0665421
chr1	10431749	10432052	304	0.0663563
chr1	10432466	10432907	442	0.0668605
chr1	10436140	10436850	711	0.0958722
chr1	10440434	10440501	68	0.0565277
chr1	10443591	10445514	1924	0.0738894
chr1	10446429	10447210	782	0.0868047
chr1	10447621	10447997	377	0.0864055
chr1	10467903	10469581	1679	0.0872865
chr1	10472648	10472791	144	0.0550987
chr1	10477028	10478189	1162	0.0653425
chr1	10478559	10480232	1674	0.0808204
chr1	10480649	10483227	2579	0.0696476
chr1	10489770	10490124	355	0.0784638
chr1	10492437	10493140	704	0.0977691
chr1	10500122	10500202	81	0.0567617
chr1	10506853	10507371	519	0.0582705
chr1	10508083	10508343	261	0.0547161
chr1	10510967	10511853	887	0.0729592
chr1	10512710	10512939	230	0.0643786
chr1	10516158	10516412	255	0.0696136
chr1	10516806	10517879	1074	0.0596239
chr1	10521218	10522780	1563	0.0650707
chr1	10523562	10524180	619	0.0582152
chr1	10533419	10533440	22	0.12201
chr1	10533889	10534809	921	0.0977556
chr1	10541474	10541683	210	0.147503
chr1	10542778	10542919	142	0.199264
chr1	10548806	10548971	166	0.126546
chr1	10555665	10557702	2038	0.110971
chr1	10558108	10559108	1001	0.122581
chr1	10561187	10562515	1329	0.137041
chr1	10564086	10564674	589	0.0691389
chr1	10565189	10566625	1437	0.156002
chr1	10568527	10569024	498	0.109046
chr1	10569393	10569721	329	0.107874
chr1	10570180	10570269	90	0.0874333
chr1	10570640	10571125	486	0.132005
chr1	10572266	10572610	345	0.0922659
chr1	10573033	10574675	1643	0.125426
chr1	10575046	10575132	87	0.14774
chr1	10576622	10577865	1244	0.147288
chr1	10578191	10578490	300	0.0789964
chr1	10582019	10582395	377	0.118669
chr1	10583324	10583529	206	0.102425
chr1	10587974	10589471	1498	0.120784
chr1	10592464	10593119	656	0.0785995
chr1	10596022	10596766	745	0.0703157
chr1	10597203	10598671	1469	0.0721089
chr1	10600396	10601902	1507	0.0737473
chr1	10603214	10604092	879	0.0611133
chr1	10604912	10604979	68	0.0791998
chr1	10605828	10605970	143	0.0861619
chr1	10606942	10607542	601	0.0908348
chr1	10611449	10611600	152	0.0654057
chr1	10612829	10613540	712	0.12438
chr1	10613920	10615234	1315	0.114943
chr1	10617785	10618020	236	0.179943
chr1	10619513	10620014	502	0.0817207
chr1	10620409	10620624	216	0.0773956
chr1	10633272	10633632	361	0.0706433
chr1	10640561	10640601	41	0.140114
chr1	10643570	10643969	400	0.119205
chr1	10645651	10645846	196	0.0972757
chr1	10646989	10647251	263	0.124915
chr1	10648263	10648814	552	0.0964774
chr1	10651801	10653427	1627	0.0891586
chr1	10654361	10658652	4292	0.115631
chr1	10661899	10662016	118	0.107385
chr1	10662877	10663224	348	0.128468
chr1	10664159	10664600	442	0.0722286
chr1	10668117	10668401	285	0.0937186
chr1	10672451	10674260	1810	0.102371
chr1	10675161	10679209	4049	0.060471
chr1	10680235	10680570	336	0.0940579
chr1	10680905	10681115	211	0.0593116
chr1	10682394	10682588	195	0.0534652
chr1	10682899	10684001	1103	0.0582278
chr1	10684569	10687905	3337	0.099063
chr1	10688348	10689022	675	0.110441
chr1	10689282	10689653	372	0.0654179
chr1	10690026	10692868	2843	0.0655879
chr1	10692980	10694658	1679	0.0777979
chr1	10694874	10696630	1757	0.112227
chr1	10697282	10698524	1243	0.0934159
chr1	10699224	10702960	3737	0.075216
chr1	10703171	10704340	1170	0.0674056
chr1	10705573	10708045	2473	0.0805767
chr1	10708796	10709885	1090	0.0589219
chr1	10711641	10712864	1224	0.0686911
chr1	10713351	10717049	3699	0.0633182
chr1	10718017	10718660	644	0.060311
chr1	10720027	10721387	1361	0.0607128
chr1	10722680	10723968	1289	0.0818711
chr1	10725505	10726334	830	0.083325
chr1	10727189	10727660	472	0.0673072
chr1	10728696	10729776	1081	0.094418
chr1	10730684	10732932	2249	0.0848842
chr1	10733442	10734293	852	0.0623994
chr1	10736306	10737265	960	0.0794204
chr1	10739523	10740290	768	0.117457
chr1	10740609	10743568	2960	0.0882525
chr1	10743776	10745765	1990	0.0848593
chr1	10746855	10750929	4075	0.121022
chr1	10751306	10751808	503	0.0855568
chr1	10752186	10753467	1282	0.100655
chr1	10760459	10760779	321	0.0695836
chr1	10768554	10771488	2935	0.0628031
chr1	10771863	10772079	217	0.0818533
chr1	10772470	10772620	151	0.061087
chr1	10780999	10783229	2231	0.0775798
chr1	10783547	10784206	660	0.0990945
chr1	10788367	10789785	1419	0.0663381
chr1	10794824	10797578	2755	0.0690977
chr1	10798078	10798759	682	0.0589109
chr1	10799253	10800421	1169	0.0649698
chr1	10802304	10802762	459	0.0560681
chr1	10804745	10807452	2708	0.090045
chr1	10809595	10810395	801	0.0639127
chr1	10815433	10816901	1469	0.0782236
chr1	10817907	10818321	415	0.0907342
chr1	10819689	10821867	2179	0.092494
chr1	10822353	10823280	928	0.0789265
chr1	10824161	10825676	1516	0.0852611
chr1	10831971	10833142	1172	0.0558818
chr1	10834748	10836110	1363	0.0640187
chr1	10838580	10840207	1628	0.0757017
chr1	10841632	10842586	955	0.0611298
chr1	10845487	10845971	485	0.0569831
chr1	10847569	10848418	850	0.0834636
chr1	10850606	10850908	303	0.074733
chr1	10851560	10851933	374	0.126793
chr1	10869018	10869575	558	0.0661225
chr1	10874451	10876692	2242	0.0613436
chr1	10878334	10879718	1385	0.102514
chr1	10882786	10883402	617	0.0652486
chr1	10888403	10891907	3505	0.0784516
chr1	10892408	10892513	106	0.0796883
chr1	10892845	10892898	54	0.0863871
chr1	10893219	10893449	231	0.0739174
chr1	10896900	10897994	1095	0.0712134
chr1	10907940	10910958	3019	0.0790911
chr1	10912916	10913619	704	0.0654633
chr1	10917998	10918539	542	0.0702511
chr1	10918859	10919199	341	0.0817232
chr1	10920893	10922579	1687	0.0709515
chr1	10926121	10926512	392	0.0951848
chr1	10927957	10929814	1858	0.0718728
chr1	10931913	10932203	291	0.0661505
chr1	10932505	10932682	178	0.0563966
chr1	10936691	10936933	243	0.0576947
chr1	10937333	10940002	2670	0.0591902
chr1	10949903	10951154	1252	0.0800874
chr1	10954914	10954956	43	0.0515364
chr1	10964058	10965136	1079	0.0760561
chr1	10969846	10971677	1832	0.0647083
chr1	10976086	10977432	1347	0.073615
chr1	10986387	10986939	553	0.0736046
chr1	10992348	10992539	192	0.0586126
chr1	10996739	10997255	517	0.0587519
chr1	10999822	11001062	1241	0.0695926
chr1	11006198	11007838	1641	0.0711473
chr1	11008127	11008960	834	0.0561226
chr1	11009786	11009976	191	0.0582076
chr1	11010383	11011603	1221	0.0729483
chr1	11018616	11018846	231	0.0516309
chr1	11024967	11025874	908	0.0765246
chr1	11041772	11042602	831	0.0836759
chr1	11044363	11044877	515	0.101971
chr1	11045190	11046507	1318	0.0713267
chr1	11050171	11051084	914	0.057717
chr1	11051461	11051900	440	0.0737284
chr1	11052552	11053039	488	0.0887816
chr1	11053370	11053559	190	0.0688671
chr1	11065880	11066285	406	0.0643057
chr1	11071467	11072047	581	0.111425
chr1	11074723	11075619	897	0.153902
chr1	11077547	11077553	7	0.0899535
chr1	11080218	11080691	474	0.0894357
chr1	11086731	11087775	1045	0.100865
chr1	11090900	11091308	409	0.118151
chr1	11091688	11092390	703	0.138955
chr1	11096099	11096289	191	0.0852502
chr1	11098466	11098846	381	0.0934275
chr1	11102243	11105642	3400	0.0978634
chr1	11106321	11106782	462	0.0804376
chr1	11110738	11111162	425	0.110557
chr1	11112078	11115981	3904	0.112808
chr1	11117142	11117719	578	0.0729754
chr1	11118082	11119079	998	0.0985324
chr1	11121511	11122000	490	0.130041
chr1	11122477	11122568	92	0.168077
chr1	11123118	11123286	169	0.143786
chr1	11124204	11124468	265	0.100379
chr1	11126938	11127030	93	0.0638496
chr1	11127804	11128109	306	0.0644698
chr1	11129649	11130493	845	0.060841
chr1	11130795	11131927	1133	0.0632017
chr1	11134014	11134500	487	0.0728711
chr1	11136802	11136980	179	0.0576961
chr1	11137339	11137778	440	0.0690575
chr1	11138254	11138345	92	0.0870507
chr1	11138686	11139125	440	0.0722404
chr1	11150344	11150707	364	0.0678568
chr1	11157509	11157521	13	0.0537788
chr1	11158105	11158439	335	0.0827674
chr1	11161876	11162394	519	0.0842531
chr1	11162771	11163871	1101	0.0677548
chr1	11167733	11167910	178	0.056021
chr1	11168276	11168508	233	0.0568999
chr1	11172606	11173069	464	0.057598
chr1	11173700	11173886	187	0.0621385
chr1	11174193	11174619	427	0.0610689
chr1	11174931	11175790	860	0.0602654
chr1	11178610	11178980	371	0.0603663
chr1	11181183	11181638	456	0.0664851
chr1	11181978	11182216	239	0.0591759
chr1	11182843	11183105	263	0.0729735
chr1	11184134	11184489	356	0.0639762
chr1	11191110	11191885	776	0.0841946
chr1	11193049	11193408	360	0.0989698
[truncated: 295,727+ more rows]

## Sheet: Table S4
Supplemental Table S4. List of identified 5hmC regions in liver tumor
chr	start	end	width	5hmC level
chr1	839106	839177	72	0.0449542
chr1	851520	851915	396	0.0832707
chr1	862521	862703	183	0.050378
chr1	893209	893364	156	0.0456103
chr1	896676	897397	722	0.0703647
chr1	971024	972567	1544	0.0619742
chr1	973376	975134	1759	0.0821058
chr1	976544	976804	261	0.0969384
chr1	995500	995967	468	0.0814902
chr1	1005519	1005818	300	0.0547344
chr1	1045871	1045971	101	0.0545553
chr1	1062145	1062749	605	0.0573462
chr1	1103401	1103681	281	0.0480826
chr1	1147125	1147466	342	0.0526044
chr1	1150147	1150322	176	0.0672235
chr1	1168027	1168354	328	0.0691044
chr1	1172485	1172640	156	0.0552108
chr1	1174168	1174411	244	0.0519426
chr1	1185055	1185128	74	0.0546856
chr1	1185999	1186228	230	0.0732081
chr1	1193779	1194250	472	0.0640215
chr1	1195489	1195592	104	0.0479349
chr1	1197183	1197671	489	0.0544116
chr1	1214152	1214313	162	0.0594128
chr1	1233604	1233799	196	0.0493594
chr1	1246744	1246922	179	0.0471403
chr1	1250541	1250827	287	0.0628264
chr1	1265550	1265828	279	0.0542992
chr1	1273421	1273621	201	0.0466414
chr1	1279983	1281230	1248	0.104478
chr1	1326152	1326869	718	0.0597165
chr1	1327312	1327582	271	0.0550305
chr1	1330614	1331205	592	0.0599892
chr1	1338538	1339564	1027	0.0722627
chr1	1362491	1362709	219	0.102583
chr1	1372447	1373372	926	0.0718389
chr1	1380559	1380672	114	0.0620393
chr1	1384930	1385312	383	0.0666409
chr1	1483795	1484509	715	0.0614594
chr1	1490438	1490974	537	0.0635564
chr1	1503401	1503626	226	0.0687408
chr1	1529588	1530286	699	0.0530435
chr1	1534170	1534751	582	0.047386
chr1	1553348	1553968	621	0.0574706
chr1	1555052	1556036	985	0.0782301
chr1	1688716	1688733	18	0.0449049
chr1	1711530	1713469	1940	0.0903493
chr1	1764060	1765440	1381	0.0791589
chr1	1774314	1774504	191	0.0667495
chr1	1774872	1775239	368	0.070242
chr1	1784077	1784886	810	0.0704594
chr1	1793361	1794548	1188	0.125585
chr1	1802965	1804529	1565	0.0829427
chr1	1804898	1805647	750	0.0941567
chr1	1814573	1814625	53	0.0792874
chr1	1815663	1816144	482	0.105121
chr1	1817276	1817488	213	0.167822
chr1	1817946	1818676	731	0.078213
chr1	1827562	1827867	306	0.0970166
chr1	1851158	1851483	326	0.102507
chr1	1858663	1858824	162	0.0907191
chr1	1878976	1879248	273	0.05139
chr1	1898029	1898298	270	0.0637027
chr1	1900156	1900501	346	0.0650824
chr1	1913797	1913877	81	0.0506032
chr1	1915103	1915166	64	0.0532017
chr1	1919571	1919931	361	0.0655815
chr1	1954188	1954920	733	0.0482633
chr1	1980591	1980720	130	0.0624759
chr1	2036143	2036508	366	0.0749431
chr1	2056874	2057170	297	0.0578794
chr1	2066665	2067250	586	0.0661607
chr1	2124708	2125124	417	0.0584727
chr1	2129671	2130415	745	0.066619
chr1	2140073	2140423	351	0.087468
chr1	2164934	2165543	610	0.0688893
chr1	2168095	2169247	1153	0.0784071
chr1	2171024	2172127	1104	0.106097
chr1	2173811	2174156	346	0.0614059
chr1	2179933	2180788	856	0.0691301
chr1	2185438	2187457	2020	0.0645892
chr1	2187762	2188306	545	0.0661539
chr1	2195999	2197071	1073	0.0804405
chr1	2219888	2221889	2002	0.0696487
chr1	2224486	2225030	545	0.0753066
chr1	2231463	2231862	400	0.063345
chr1	2233403	2234412	1010	0.072992
chr1	2244339	2244983	645	0.0873812
chr1	2245648	2245988	341	0.0725883
chr1	2252172	2252467	296	0.0586978
chr1	2252860	2252937	78	0.0467936
chr1	2324866	2326488	1623	0.0695777
chr1	2332075	2332537	463	0.0571963
chr1	2346702	2347037	336	0.0799297
chr1	2359702	2359742	41	0.0496833
chr1	2379131	2380069	939	0.0644197
chr1	2400527	2400991	465	0.0483331
chr1	2407309	2407563	255	0.0531591
chr1	2424622	2424677	56	0.0463561
chr1	2437846	2438037	192	0.0581558
chr1	2438642	2439827	1186	0.059192
chr1	2455204	2456334	1131	0.0678091
chr1	2465902	2466275	374	0.0741996
chr1	2488841	2489292	452	0.0521347
chr1	2493264	2494078	815	0.0471046
chr1	2509892	2510470	579	0.0953429
chr1	2524733	2524984	252	0.068053
chr1	2534859	2535240	382	0.0570985
chr1	2541640	2541936	297	0.0549397
chr1	2765201	2765391	191	0.0544492
chr1	2795583	2795772	190	0.0458366
chr1	2821337	2821404	68	0.045003
chr1	2990788	2991375	588	0.067834
chr1	3032345	3033055	711	0.0555011
chr1	3061011	3061825	815	0.0529905
chr1	3220901	3221519	619	0.0692221
chr1	3378816	3379107	292	0.050746
chr1	3388678	3389537	860	0.0509551
chr1	3419155	3419382	228	0.0545397
chr1	3436246	3436328	83	0.0436485
chr1	3444890	3445237	348	0.0553754
chr1	3449047	3449643	597	0.0526916
chr1	3454636	3455036	401	0.0551511
chr1	3540028	3540403	376	0.0720371
chr1	3570005	3570066	62	0.0622736
chr1	3600149	3600502	354	0.063625
chr1	3605234	3606061	828	0.0558651
chr1	3689898	3691413	1516	0.0828553
chr1	3754684	3755044	361	0.0452178
chr1	3776179	3776252	74	0.0485098
chr1	3795910	3796789	880	0.0597584
chr1	3804880	3805294	415	0.0522224
chr1	3828589	3828644	56	0.0508084
chr1	4418431	4419876	1446	0.0537755
chr1	4566154	4566606	453	0.0505126
chr1	4684491	4685066	576	0.0459261
chr1	4784388	4784850	463	0.0507482
chr1	4912257	4913460	1204	0.0579759
chr1	5036658	5037673	1016	0.0612685
chr1	5138932	5139041	110	0.0615547
chr1	5139857	5140963	1107	0.0725925
chr1	6007810	6008386	577	0.0581228
chr1	6038674	6039628	955	0.0692058
chr1	6065523	6065593	71	0.0502658
chr1	6095848	6096284	437	0.0598222
chr1	6096644	6096917	274	0.0582345
chr1	6103923	6104498	576	0.0588695
chr1	6108371	6109482	1112	0.0536159
chr1	6186622	6186857	236	0.048826
chr1	6243221	6244835	1615	0.0759831
chr1	6261495	6261946	452	0.0534097
chr1	6267177	6267733	557	0.101317
chr1	6275751	6275999	249	0.0502304
chr1	6308698	6309013	316	0.101096
chr1	6318686	6319774	1089	0.0544531
chr1	6322128	6322344	217	0.0535977
chr1	6348202	6349054	853	0.0616402
chr1	6401918	6403279	1362	0.0521602
chr1	6403730	6404563	834	0.0754532
chr1	6454520	6454987	468	0.0914256
chr1	6470754	6471019	266	0.0744995
chr1	6496044	6496164	121	0.129579
chr1	6522291	6522424	134	0.0522558
chr1	6551574	6552735	1162	0.0809128
chr1	6555313	6556026	714	0.059686
chr1	6579762	6580541	780	0.0888543
chr1	6605420	6605846	427	0.0862986
chr1	6613381	6613491	111	0.0558782
chr1	6639249	6639632	384	0.0958138
chr1	6641519	6642156	638	0.0595565
chr1	6647166	6648569	1404	0.0806456
chr1	6651323	6652262	940	0.0904075
chr1	6676366	6676985	620	0.105146
chr1	6678472	6679038	567	0.0559893
chr1	6687314	6687493	180	0.0517319
chr1	6719339	6719454	116	0.0460564
chr1	6762215	6762443	229	0.122968
chr1	6841622	6841690	69	0.0504898
chr1	6842014	6842687	674	0.0763492
chr1	6846773	6847481	709	0.0608303
chr1	6847783	6848135	353	0.0545221
chr1	6869366	6869440	75	0.103183
chr1	6915405	6916265	861	0.0476267
chr1	6916923	6918100	1178	0.05573
chr1	7023448	7024335	888	0.0722753
chr1	7073958	7074894	937	0.0580002
chr1	7181877	7182193	317	0.0561223
chr1	7322669	7323867	1199	0.0886293
chr1	7324188	7324480	293	0.0915268
chr1	7325108	7325226	119	0.0796508
chr1	7405510	7405924	415	0.0624604
chr1	7406440	7406480	41	0.0553692
chr1	7445180	7445350	171	0.0474226
chr1	7467761	7467874	114	0.0454268
chr1	7528548	7529034	487	0.0524861
chr1	7537728	7538162	435	0.0509511
chr1	7612293	7613172	880	0.0533811
chr1	7632689	7633864	1176	0.0853335
chr1	7673559	7674529	971	0.0611019
chr1	7704784	7705932	1149	0.0699965
chr1	7741484	7741518	35	0.0465865
chr1	7842439	7843260	822	0.0810644
chr1	7845237	7845798	562	0.0758327
chr1	7972674	7972934	261	0.0525361
chr1	8029917	8031083	1167	0.0576311
chr1	8041089	8041781	693	0.0768483
chr1	8072453	8072927	475	0.0776692
chr1	8073301	8075423	2123	0.0686348
chr1	8105836	8106210	375	0.0662324
chr1	8137482	8138824	1343	0.0587354
chr1	8143526	8144682	1157	0.092772
chr1	8153607	8155332	1726	0.0905208
chr1	8194750	8196599	1850	0.0659774
chr1	8226261	8226880	620	0.0717535
chr1	8227917	8228383	467	0.0600919
chr1	8265512	8265945	434	0.0550103
chr1	8273607	8275030	1424	0.0793571
chr1	8278064	8279199	1136	0.0859158
chr1	8317042	8318550	1509	0.0789269
chr1	8362397	8362569	173	0.0522145
chr1	8408059	8408652	594	0.0738398
chr1	8423975	8424295	321	0.0755671
chr1	8432664	8434259	1596	0.0760722
chr1	8434605	8435167	563	0.0713288
chr1	8438595	8440421	1827	0.0625215
chr1	8442032	8442529	498	0.0709486
chr1	8445545	8445793	249	0.0918589
chr1	8474324	8474332	9	0.0772966
chr1	8477723	8478577	855	0.124218
chr1	8478999	8480259	1261	0.0820284
chr1	8525150	8525400	251	0.0709482
chr1	8529745	8530253	509	0.0517513
chr1	8530604	8531964	1361	0.0653997
chr1	8567024	8567497	474	0.0881315
chr1	8577901	8578574	674	0.0699399
chr1	8580672	8581078	407	0.0618524
chr1	8625757	8626295	539	0.0547576
chr1	8653771	8654392	622	0.063317
chr1	8654829	8655211	383	0.0836787
chr1	8656919	8658084	1166	0.0663701
chr1	8720316	8720809	494	0.0630012
chr1	8746384	8747198	815	0.0592978
chr1	8760608	8760873	266	0.140306
chr1	8765247	8765637	391	0.0821664
chr1	8791200	8791443	244	0.0670303
chr1	8848701	8848947	247	0.0528449
chr1	8849501	8850234	734	0.0658549
chr1	8919275	8919955	681	0.0866676
chr1	8983077	8983684	608	0.0609883
chr1	9099861	9099999	139	0.0457161
chr1	9116099	9116274	176	0.0548788
chr1	9129648	9129942	295	0.0709275
chr1	9142159	9142632	474	0.0623423
chr1	9159983	9160289	307	0.0581914
chr1	9172106	9172542	437	0.0919528
chr1	9185578	9185846	269	0.0544861
chr1	9213390	9214460	1071	0.0657144
chr1	9219251	9219721	471	0.0736322
chr1	9230910	9231901	992	0.0552451
chr1	9238480	9239597	1118	0.0737063
chr1	9244279	9244565	287	0.0522738
chr1	9259055	9259303	249	0.0715747
chr1	9263771	9264573	803	0.0621426
chr1	9276835	9276882	48	0.0685017
chr1	9297571	9298013	443	0.0777966
chr1	9300249	9301104	856	0.0678968
chr1	9308013	9310411	2399	0.0524059
chr1	9324954	9325411	458	0.0520529
chr1	9326074	9327961	1888	0.0642379
chr1	9329055	9330484	1430	0.0700451
chr1	9349195	9349419	225	0.0530471
chr1	9361347	9362712	1366	0.0542961
chr1	9363411	9364215	805	0.0530259
chr1	9373725	9374560	836	0.0483517
chr1	9381817	9384092	2276	0.0645407
chr1	9385549	9386549	1001	0.0587933
chr1	9387513	9387994	482	0.0453956
chr1	9397243	9398597	1355	0.0592616
chr1	9400171	9402920	2750	0.0614701
chr1	9408283	9408544	262	0.0543833
chr1	9411674	9412040	367	0.0448543
chr1	9413405	9413704	300	0.0527261
chr1	9426550	9427165	616	0.0503084
chr1	9429394	9429525	132	0.0485731
chr1	9432123	9434096	1974	0.0764346
chr1	9436291	9437754	1464	0.0696825
chr1	9484406	9484490	85	0.0701613
chr1	9504029	9504670	642	0.0759979
chr1	9539422	9540465	1044	0.060938
chr1	9570927	9571434	508	0.0976312
chr1	9598550	9598983	434	0.0598824
chr1	9608012	9608089	78	0.16795
chr1	9608828	9609258	431	0.106415
chr1	9619879	9620393	515	0.10072
chr1	9643696	9644220	525	0.0702307
chr1	9651128	9652296	1169	0.0718542
chr1	9670134	9670534	401	0.0520657
chr1	9713284	9713556	273	0.053766
chr1	9715648	9716738	1091	0.060376
chr1	9742137	9742630	494	0.0499085
chr1	9762868	9762963	96	0.0563648
chr1	9774199	9774783	585	0.0557223
chr1	9786011	9786643	633	0.0875404
chr1	9787806	9787839	34	0.069344
chr1	9792325	9792986	662	0.0665952
chr1	9806902	9807003	102	0.080311
chr1	9820344	9820546	203	0.0531676
chr1	9894486	9895819	1334	0.0637207
chr1	9940666	9941345	680	0.0512658
chr1	9967475	9967869	395	0.0582191
chr1	10002254	10002338	85	0.101832
chr1	10020211	10020963	753	0.0550881
chr1	10059229	10059342	114	0.0938011
chr1	10099283	10099467	185	0.0496064
chr1	10104258	10104932	675	0.0547237
chr1	10106064	10107275	1212	0.0622562
chr1	10144002	10144404	403	0.0673373
chr1	10231208	10231463	256	0.0543308
chr1	10231996	10232497	502	0.0494936
chr1	10273916	10274229	314	0.112674
chr1	10287370	10287663	294	0.0745911
chr1	10345530	10345804	275	0.0888248
chr1	10396810	10397633	824	0.0558326
chr1	10458262	10458358	97	0.0715747
chr1	10531254	10531459	206	0.0650775
chr1	10548493	10548971	479	0.0943903
chr1	10568537	10569032	496	0.0970084
chr1	10570921	10571125	205	0.0651549
chr1	10578828	10579642	815	0.0598976
chr1	10650068	10650394	327	0.0698378
chr1	10651151	10651344	194	0.06531
chr1	10655329	10657347	2019	0.0710851
chr1	10726030	10726224	195	0.0555454
chr1	10764389	10764980	592	0.0773204
chr1	10800194	10800883	690	0.0512647
chr1	10840914	10841324	411	0.061754
chr1	10898520	10899557	1038	0.0558254
chr1	10921057	10921606	550	0.0630891
chr1	10960536	10961542	1007	0.0536769
chr1	11006070	11007441	1372	0.0639875
chr1	11087753	11088002	250	0.0588592
chr1	11124100	11124435	336	0.0660606
chr1	11158654	11158916	263	0.0935157
chr1	11192782	11193408	627	0.0972936
chr1	11196928	11197492	565	0.0523389
chr1	11259396	11260088	693	0.0556264
chr1	11329574	11329907	334	0.0967706
chr1	11352398	11353327	930	0.0971401
chr1	11376617	11377271	655	0.0466099
chr1	11515313	11516205	893	0.070704
chr1	11547401	11547603	203	0.0454367
chr1	11641072	11641680	609	0.0705569
chr1	11642989	11643450	462	0.0684013
chr1	11688756	11689468	713	0.054309
chr1	11695270	11695531	262	0.0773222
chr1	11713052	11713643	592	0.0713831
chr1	11726728	11726755	28	0.0576589
chr1	11740295	11740472	178	0.077959
chr1	11780265	11780818	554	0.08891
chr1	11797359	11799333	1975	0.0812554
chr1	11843546	11843879	334	0.053197
chr1	11860967	11861720	754	0.0792524
chr1	11862830	11864043	1214	0.0506474
chr1	11882485	11882783	299	0.0526881
chr1	11901670	11902098	429	0.0618491
chr1	11906950	11907269	320	0.0583798
chr1	11910938	11911099	162	0.0547619
chr1	11915804	11916114	311	0.0578357
chr1	11952078	11952848	771	0.0649353
chr1	11971235	11972185	951	0.0811395
chr1	11998040	12000226	2187	0.0693358
chr1	12016981	12017559	579	0.0537622
chr1	12020440	12021427	988	0.075217
chr1	12065042	12067419	2378	0.0803059
chr1	12206463	12208424	1962	0.084931
chr1	12208815	12209148	334	0.0608719
chr1	12209485	12210263	779	0.0579232
chr1	12210744	12213353	2610	0.0573349
chr1	12217657	12217878	222	0.0601519
chr1	12230509	12231822	1314	0.0960145
chr1	12238887	12239529	643	0.0793172
chr1	12240266	12241688	1423	0.0778998
chr1	12247673	12248171	499	0.0738238
chr1	12248947	12249830	884	0.0725917
chr1	12268883	12269624	742	0.0691103
chr1	12308235	12308546	312	0.0820774
chr1	12331750	12332046	297	0.0677542
chr1	12333024	12333181	158	0.0702852
chr1	12359277	12359470	194	0.046108
chr1	12360560	12361623	1064	0.0451468
chr1	12416033	12416529	497	0.0817967
chr1	12466042	12466871	830	0.100956
chr1	12473253	12473851	599	0.0517895
chr1	12498521	12499365	845	0.0741162
chr1	12501542	12501827	286	0.0568072
chr1	12517748	12519371	1624	0.0820406
chr1	12545189	12545563	375	0.0875403
chr1	12550573	12551662	1090	0.0613894
chr1	12572278	12572342	65	0.0495921
chr1	12573012	12573236	225	0.0492037
chr1	12601852	12602511	660	0.102072
chr1	12616103	12617199	1097	0.0751414
chr1	12618547	12619760	1214	0.070942
chr1	12625772	12626803	1032	0.072622
chr1	12627277	12628244	968	0.0563009
chr1	12630244	12630952	709	0.0495213
chr1	12632477	12633402	926	0.0564963
chr1	12634745	12635080	336	0.0475254
chr1	12638918	12641906	2989	0.073851
chr1	12650082	12651924	1843	0.0877393
chr1	12654250	12655664	1415	0.135122
chr1	12657790	12664806	7017	0.0807169
chr1	12668101	12670012	1912	0.102488
chr1	12670339	12671712	1374	0.094462
chr1	12681498	12681892	395	0.0615301
chr1	14048373	14048821	449	0.050313
chr1	14126347	14126681	335	0.0597641
chr1	14135879	14136924	1046	0.0681469
chr1	14137231	14137405	175	0.0531747
chr1	14140176	14140732	557	0.0529917
chr1	14142562	14142678	117	0.0435748
chr1	14427509	14427768	260	0.04774
chr1	14918496	14918927	432	0.0451784
chr1	15126924	15127283	360	0.0494039
chr1	15173401	15174558	1158	0.0515619
chr1	15183475	15184533	1059	0.053733
chr1	15203641	15204429	789	0.0610958
chr1	15245518	15245973	456	0.0688874
chr1	15272958	15274127	1170	0.0576574
chr1	15325325	15327370	2046	0.0522982
chr1	15343071	15345500	2430	0.0621205
chr1	15351906	15352720	815	0.0749198
chr1	15406695	15407013	319	0.0461076
chr1	15481708	15481840	133	0.0585124
chr1	15500460	15502068	1609	0.0920922
chr1	15503452	15504108	657	0.0693654
chr1	15510926	15511641	716	0.0534235
chr1	15512342	15513470	1129	0.0507832
chr1	15523680	15524881	1202	0.0620129
chr1	15525193	15526955	1763	0.0660513
chr1	15572829	15573525	697	0.0810693
chr1	15623871	15624270	400	0.0509505
chr1	15651228	15651647	420	0.0526568
chr1	15659022	15659804	783	0.0615751
chr1	15678503	15679812	1310	0.0823852
chr1	15681426	15682290	865	0.0840851
chr1	15703915	15704155	241	0.0534552
chr1	15735243	15735736	494	0.0667523
chr1	15738708	15740291	1584	0.0701374
chr1	15742275	15743922	1648	0.065813
chr1	15748851	15749638	788	0.0567913
chr1	15752716	15753696	981	0.065828
chr1	15758659	15758927	269	0.057475
chr1	15759358	15760377	1020	0.0779319
chr1	15770031	15770497	467	0.0537593
chr1	15811645	15811692	48	0.0483016
chr1	15812135	15812741	607	0.0710484
chr1	15923003	15924138	1136	0.062653
chr1	15948033	15948176	144	0.118066
chr1	15953963	15954382	420	0.0971023
chr1	15989926	15990106	181	0.0579927
chr1	16003442	16003495	54	0.0869507
chr1	16004115	16004412	298	0.0691014
chr1	16015866	16016281	416	0.0643797
chr1	16023097	16023964	868	0.0558714
chr1	16026923	16027336	414	0.050288
chr1	16050014	16051123	1110	0.0541799
chr1	16070550	16071034	485	0.0523112
chr1	16098444	16099251	808	0.0689346
chr1	16099579	16099646	68	0.0699692
chr1	16124142	16124796	655	0.0977762
chr1	16127213	16127746	534	0.0772659
chr1	16146742	16147322	581	0.0626536
chr1	16184131	16184240	110	0.110954
chr1	16189545	16189731	187	0.119482
chr1	16199081	16199525	445	0.0587556
chr1	16217238	16217633	396	0.0698802
chr1	16218170	16218271	102	0.0640737
chr1	16227619	16228012	394	0.0659353
chr1	16250458	16250815	358	0.0910914
chr1	16251747	16251850	104	0.0620004
chr1	16276601	16276948	348	0.0556557
chr1	16279011	16280361	1351	0.056158
chr1	16294209	16295579	1371	0.051459
chr1	16295935	16296176	242	0.047613
chr1	16335439	16335578	140	0.0581008
chr1	16340169	16341595	1427	0.0741098
chr1	16342875	16344987	2113	0.0760196
chr1	16345368	16345735	368	0.0476994
chr1	16409516	16410014	499	0.0584095
chr1	16414209	16414366	158	0.0484635
chr1	16419927	16420461	535	0.0845749
chr1	16421445	16421536	92	0.0602123
chr1	16437437	16439276	1840	0.0681177
chr1	16446447	16446702	256	0.0540545
chr1	16449572	16450404	833	0.0533646
chr1	16475637	16477188	1552	0.0562208
chr1	16491367	16492417	1051	0.0819395
chr1	16510517	16511825	1309	0.0817318
chr1	16522777	16523343	567	0.0631228
chr1	16554480	16554517	38	0.0496253
chr1	16562643	16562923	281	0.0779472
chr1	16564289	16564689	401	0.0656796
chr1	16569889	16572554	2666	0.0629611
chr1	16580654	16581248	595	0.0525362
chr1	16605168	16605786	619	0.0864482
chr1	16616301	16616796	496	0.0660757
chr1	16617684	16618156	473	0.0746298
chr1	16633225	16633802	578	0.0646901
chr1	16634755	16634910	156	0.0561285
chr1	16648389	16649057	669	0.0860788
chr1	16659327	16659720	394	0.0723961
chr1	16664439	16664482	44	0.0657973
chr1	16664945	16665772	828	0.0851024
chr1	16673529	16673650	122	0.0832208
chr1	16679780	16679980	201	0.110254
chr1	16685872	16686286	415	0.0563881
chr1	16697337	16697797	461	0.0747535
chr1	16698235	16698922	688	0.075948
chr1	16702943	16703650	708	0.0680567
chr1	16713447	16714460	1014	0.102146
chr1	16717970	16718854	885	0.0688551
chr1	16783297	16784108	812	0.0737331
chr1	16967619	16967919	301	0.059135
chr1	17028583	17028694	112	0.0986523
chr1	17233122	17233250	129	0.0539848
chr1	17293320	17293971	652	0.102767
chr1	17344644	17345195	552	0.0667915
chr1	17407791	17408203	413	0.0591525
chr1	17408958	17409357	400	0.061607
chr1	17447741	17449432	1692	0.0750183
chr1	17499899	17500173	275	0.0573429
chr1	17500642	17501555	914	0.0633875
chr1	17557876	17558079	204	0.0579222
chr1	17572280	17573656	1377	0.0588715
chr1	17631023	17633139	2117	0.0598792
chr1	17741407	17741936	530	0.0544383
chr1	17766709	17766995	287	0.0806196
chr1	17813840	17814085	246	0.0544888
chr1	17833845	17834553	709	0.0570705
chr1	17852749	17853165	417	0.0859755
chr1	17864666	17865388	723	0.0715436
chr1	17867441	17867992	552	0.0736317
chr1	17887065	17888492	1428	0.071795
chr1	17889141	17889644	504	0.0517189
chr1	17890856	17892741	1886	0.0643962
chr1	17902036	17902566	531	0.0959274
chr1	17910488	17911225	738	0.0727943
chr1	17911676	17914058	2383	0.0882873
chr1	17916207	17917627	1421	0.0735619
chr1	17941459	17942177	719	0.0576009
chr1	17943486	17945069	1584	0.0561427
chr1	17946411	17947627	1217	0.0582116
chr1	17955810	17959717	3908	0.0632524
chr1	17961889	17962830	942	0.0836275
chr1	17990158	17990725	568	0.0595482
chr1	17994766	17995686	921	0.0571921
chr1	18003005	18003127	123	0.0470146
chr1	18004342	18004684	343	0.0491597
chr1	18007023	18007208	186	0.0499566
chr1	18061222	18062201	980	0.122429
chr1	18305180	18305534	355	0.048273
chr1	18453817	18454599	783	0.0606416
chr1	18492924	18493843	920	0.0681474
chr1	18611258	18613215	1958	0.0734233
chr1	18616244	18616710	467	0.0509971
chr1	18644726	18645505	780	0.0659909
chr1	18769015	18769215	201	0.05095
chr1	18823799	18823923	125	0.0536682
chr1	19120868	19121851	984	0.0566429
chr1	19143434	19144108	675	0.0550704
chr1	19195436	19196943	1508	0.058542
chr1	19214905	19215844	940	0.0603398
chr1	19218587	19219193	607	0.0759285
chr1	19224900	19225701	802	0.0769707
chr1	19232072	19233497	1426	0.0685257
chr1	19252685	19253487	803	0.0678819
chr1	19254910	19256501	1592	0.0552316
chr1	19258096	19259914	1819	0.0741894
chr1	19264245	19266829	2585	0.0669323
chr1	19273200	19275238	2039	0.0805346
chr1	19280669	19281076	408	0.0685918
chr1	19301639	19301761	123	0.0502681
chr1	19324767	19325054	288	0.0564936
chr1	19325487	19325499	13	0.0638536
chr1	19361452	19363122	1671	0.0680709
chr1	19377325	19377930	606	0.0694262
chr1	19391523	19393754	2232	0.0750301
chr1	19401069	19401806	738	0.0977382
chr1	19407403	19409950	2548	0.0749395
chr1	19418665	19418896	232	0.0528208
chr1	19437458	19437639	182	0.0438373
chr1	19583789	19584246	458	0.0492984
chr1	19588825	19589300	476	0.0470896
chr1	19659977	19660700	724	0.0518086
chr1	19670654	19671311	658	0.0661811
chr1	19692904	19693169	266	0.0628002
chr1	19713566	19714524	959	0.059976
chr1	19730310	19730516	207	0.0491436
chr1	19735816	19736077	262	0.0625253
chr1	19747710	19748062	353	0.0526569
chr1	19755934	19756370	437	0.079339
chr1	19774008	19774836	829	0.0759233
chr1	19789100	19789886	787	0.0833647
chr1	19792327	19794469	2143	0.0746656
chr1	19802492	19803602	1111	0.05747
chr1	19815052	19815349	298	0.0639475
chr1	19832487	19832720	234	0.0577781
chr1	19834707	19834973	267	0.0652918
chr1	19932020	19932476	457	0.127545
chr1	19947266	19947755	490	0.0594375
chr1	19965466	19966279	814	0.0731362
chr1	20100682	20100794	113	0.0487117
chr1	20101216	20102180	965	0.0666373
chr1	20111908	20112191	284	0.0466035
chr1	20128596	20128941	346	0.0667612
chr1	20199589	20200381	793	0.0573222
chr1	20219136	20219838	703	0.0864158
chr1	20263074	20263978	905	0.0544626
chr1	20275486	20276089	604	0.0545599
chr1	20404125	20405495	1371	0.0548667
chr1	20406102	20406407	306	0.052744
chr1	20470579	20471477	899	0.0601483
chr1	20476987	20477266	280	0.0517997
chr1	20511615	20512143	529	0.0632329
chr1	20518904	20519570	667	0.0631239
chr1	20519980	20520457	478	0.133511
chr1	20646540	20646962	423	0.0492124
chr1	20706625	20707513	889	0.0552868
chr1	20775279	20775996	718	0.0455162
chr1	20807673	20808776	1104	0.0750032
chr1	20814067	20815191	1125	0.0780209
chr1	20815920	20816546	627	0.0530249
chr1	20823116	20824234	1119	0.0533338
chr1	20841436	20841619	184	0.0678241
chr1	20902648	20902942	295	0.0699669
chr1	20903440	20903517	78	0.0656865
chr1	20924580	20926104	1525	0.0622363
chr1	20963130	20963967	838	0.0555897
chr1	21022467	21022685	219	0.0468068
chr1	21034713	21035201	489	0.053788
chr1	21042187	21042465	279	0.0528456
chr1	21102328	21102376	49	0.064819
chr1	21124927	21125078	152	0.0702378
chr1	21276433	21276935	503	0.0834134
chr1	21290307	21290377	71	0.0514829
chr1	21397633	21398213	581	0.0571869
chr1	21485691	21485957	267	0.0547448
chr1	21487123	21487352	230	0.0576122
chr1	21490853	21491103	251	0.0819536
chr1	21491877	21492097	221	0.0562725
chr1	21559451	21559467	17	0.0555724
chr1	21568275	21568858	584	0.0519308
chr1	21573844	21574189	346	0.0586193
chr1	21592933	21594662	1730	0.0582437
chr1	21606767	21607412	646	0.0866461
chr1	21617442	21618056	615	0.0877783
chr1	21618438	21618790	353	0.0835982
chr1	21645513	21645965	453	0.0483686
chr1	21662909	21664617	1709	0.0904448
chr1	21666441	21668961	2521	0.0605787
chr1	21673660	21674619	960	0.0620106
chr1	21678636	21678970	335	0.0567161
chr1	21689090	21690211	1122	0.070703
chr1	21690518	21690549	32	0.0576975
chr1	21870454	21870961	508	0.0673054
chr1	21874053	21874843	791	0.0506088
chr1	21891326	21891566	241	0.0515279
chr1	21914542	21914932	391	0.0694409
chr1	21919589	21920318	730	0.0724495
chr1	21932606	21932736	131	0.0516584
chr1	21952333	21952883	551	0.0587199
chr1	21957536	21957906	371	0.0497805
chr1	21984620	21984831	212	0.0629802
chr1	21996707	21997464	758	0.070353
chr1	21997732	21998734	1003	0.0642736
chr1	22027255	22027385	131	0.0510517
chr1	22029314	22029571	258	0.0974811
chr1	22063413	22063459	47	0.0546082
chr1	22092602	22093278	677	0.0921362
chr1	22110517	22110949	433	0.0815815
chr1	22190441	22190868	428	0.0552808
chr1	22198371	22199083	713	0.0721577
chr1	22212557	22213194	638	0.0557232
chr1	22215254	22216336	1083	0.0624796
chr1	22298221	22298674	454	0.106028
chr1	22350476	22350788	313	0.163206
chr1	22385271	22386823	1553	0.0956294
chr1	22388901	22389398	498	0.096992
chr1	22395495	22395552	58	0.0742836
chr1	22440827	22442256	1430	0.0816958
chr1	22450474	22452901	2428	0.0559503
chr1	22459169	22459535	367	0.0534167
chr1	22613895	22614260	366	0.0735799
chr1	22666455	22668223	1769	0.106108
chr1	22730407	22731393	987	0.0687676
chr1	22773900	22774520	621	0.0572573
chr1	22800101	22800222	122	0.0523791
chr1	22800690	22800874	185	0.0686738
chr1	22801905	22802013	109	0.0791676
chr1	22824374	22824502	129	0.0469376
chr1	22824891	22825264	374	0.0692654
chr1	22860066	22860746	681	0.0586122
chr1	22964970	22965966	997	0.0582388
chr1	23006442	23008170	1729	0.0710296
chr1	23020267	23020586	320	0.0531998
chr1	23038669	23038925	257	0.0484891
chr1	23076182	23076402	221	0.0619688
chr1	23133217	23133985	769	0.0565588
chr1	23165658	23166769	1112	0.0544264
chr1	23186547	23187706	1160	0.05215
chr1	23196173	23196940	768	0.0608525
chr1	23291105	23291868	764	0.060067
chr1	23428568	23429222	655	0.0908638
chr1	23451149	23451785	637	0.0554386
chr1	23501927	23502056	130	0.0539583
chr1	23552267	23553020	754	0.0652163
chr1	23681825	23682178	354	0.0517662
chr1	23702157	23702996	840	0.0612787
chr1	23703401	23703928	528	0.0904552
chr1	23705505	23705823	319	0.0623602
chr1	23717160	23718153	994	0.059133
chr1	23720008	23722056	2049	0.0625891
chr1	23731177	23733170	1994	0.0971978
chr1	23783345	23784936	1592	0.078249
chr1	23796954	23797462	509	0.0570963
chr1	23797766	23798250	485	0.0626039
chr1	23803937	23804723	787	0.0901677
chr1	23853095	23853719	625	0.0524357
chr1	23954298	23954442	145	0.0471165
chr1	23982218	23982977	760	0.0945495
chr1	23983425	23983754	330	0.0697982
chr1	24045607	24046799	1193	0.0619938
chr1	24067915	24068714	800	0.0692017
chr1	24103747	24103995	249	0.0611776
chr1	24124627	24125601	975	0.0686656
chr1	24128432	24128799	368	0.0705365
chr1	24134587	24135168	582	0.0690268
chr1	24232212	24232762	551	0.0622771
chr1	24298622	24298859	238	0.0503674
chr1	24347818	24348512	695	0.0935391
chr1	24348820	24349093	274	0.088734
chr1	24368651	24369727	1077	0.0712338
chr1	24402733	24403571	839	0.0606019
chr1	24434396	24435184	789	0.0643841
chr1	24445993	24447507	1515	0.0609576
chr1	24510462	24511230	769	0.059994
chr1	24516281	24516572	292	0.0549057
chr1	24518116	24518744	629	0.076213
chr1	24523568	24523805	238	0.0657077
chr1	24611557	24611953	397	0.0482128
chr1	24662576	24663602	1027	0.0565427
chr1	24704853	24706310	1458	0.0785161
chr1	24764658	24765449	792	0.0538712
chr1	24809710	24810192	483	0.0643046
chr1	24827076	24827437	362	0.0695853
chr1	24878007	24878710	704	0.0617012
chr1	24912593	24913421	829	0.0738351
chr1	25011915	25012287	373	0.0551312
chr1	25016549	25017658	1110	0.0736931
chr1	25032916	25033718	803	0.149598
chr1	25061680	25061756	77	0.06512
chr1	25081059	25081557	499	0.0974041
chr1	25086177	25086444	268	0.130814
chr1	25086982	25087374	393	0.143939
chr1	25089197	25089534	338	0.109893
chr1	25101176	25101283	108	0.0914773
chr1	25118755	25119518	764	0.0930851
chr1	25123734	25123935	202	0.0558552
chr1	25124758	25125177	420	0.0634502
chr1	25129225	25129501	277	0.152607
chr1	25233874	25234131	258	0.0586176
chr1	25317400	25317619	220	0.0577867
chr1	25362808	25363534	727	0.0554851
chr1	25413499	25414149	651	0.06153
chr1	25428974	25430224	1251	0.055005
chr1	25562875	25563018	144	0.0765296
chr1	25578330	25579810	1481	0.0773753
chr1	25672558	25673149	592	0.0655361
chr1	25788495	25788996	502	0.0661302
chr1	25799821	25800003	183	0.0650307
chr1	25825599	25825780	182	0.0549814
chr1	25853636	25854238	603	0.0526588
chr1	25859432	25860086	655	0.0720274
chr1	25881046	25882125	1080	0.0491688
chr1	25895705	25896337	633	0.0508713
chr1	25946912	25947323	412	0.0549115
chr1	25967367	25968036	670	0.0836308
chr1	26069682	26071510	1829	0.0683524
chr1	26077330	26077695	366	0.0527232
chr1	26078045	26078276	232	0.0472488
chr1	26092120	26092910	791	0.0583038
chr1	26100471	26100930	460	0.0860383
chr1	26144611	26144869	259	0.0608958
chr1	26147688	26148487	800	0.0947578
chr1	26162598	26162850	253	0.108731
chr1	26194358	26194927	570	0.113059
chr1	26195295	26195357	63	0.139044
chr1	26196379	26196874	496	0.0878427
chr1	26279166	26279585	420	0.0463149
chr1	26303769	26303916	148	0.0517958
chr1	26304283	26304899	617	0.0754578
chr1	26325177	26325509	333	0.106082
chr1	26356121	26358252	2132	0.0579285
chr1	26392572	26392834	263	0.0498052
chr1	26408693	26408943	251	0.0573939
chr1	26409777	26409963	187	0.0594935
chr1	26468509	26469100	592	0.0861958
chr1	26474898	26475293	396	0.0526588
chr1	26475786	26475953	168	0.0641044
chr1	26476268	26476706	439	0.0685884
chr1	26500535	26500816	282	0.0901043
chr1	26551242	26551574	333	0.0928234
chr1	26601363	26601607	245	0.0602283
chr1	26602012	26602310	299	0.071065
chr1	26663502	26664597	1096	0.0797652
chr1	26698987	26699645	659	0.0518213
chr1	26745274	26745690	417	0.063833
chr1	26824143	26824392	250	0.0575083
chr1	26854261	26854333	73	0.090281
chr1	26854882	26855130	249	0.0829962
chr1	26856881	26857284	404	0.112265
chr1	26857642	26858197	556	0.0982124
chr1	27015652	27016547	896	0.0640453
chr1	27030897	27031076	180	0.0578455
chr1	27040927	27041539	613	0.0881808
chr1	27045091	27046169	1079	0.0706214
chr1	27046726	27047391	666	0.120677
chr1	27055824	27056270	447	0.050623
chr1	27059700	27060022	323	0.08046
chr1	27071278	27072270	993	0.0803321
chr1	27078365	27078698	334	0.0885486
chr1	27080961	27081725	765	0.0827042
chr1	27105304	27107438	2135	0.0715534
chr1	27117328	27118222	895	0.0760841
chr1	27125831	27126454	624	0.0804599
chr1	27147160	27147585	426	0.090144
chr1	27158375	27159327	953	0.0907738
chr1	27166119	27166528	410	0.070877
chr1	27187500	27188852	1353	0.0811364
chr1	27242561	27243730	1170	0.11508
chr1	27247289	27247775	487	0.103486
chr1	27261753	27262003	251	0.0644845
chr1	27274391	27274559	169	0.0682841
chr1	27327885	27330112	2228	0.062842
chr1	27336893	27337216	324	0.0839622
chr1	27341876	27342171	296	0.0616914
chr1	27397005	27397636	632	0.0546026
chr1	27437614	27438076	463	0.0588297
chr1	27439513	27439903	391	0.0588267
chr1	27445727	27446347	621	0.0661913
chr1	27446896	27446966	71	0.0884239
chr1	27447607	27447891	285	0.0613326
chr1	27451074	27451106	33	0.0526677
chr1	27467751	27468687	937	0.0713967
chr1	27740083	27740300	218	0.0737932
chr1	27744698	27745367	670	0.0676039
chr1	27775008	27775268	261	0.0784303
chr1	27775579	27775847	269	0.0737907
chr1	27778978	27779063	86	0.0817581
chr1	27780846	27781367	522	0.117976
chr1	27783533	27783680	148	0.0604028
chr1	27792190	27792384	195	0.117658
chr1	27795153	27795390	238	0.059089
chr1	27800353	27801269	917	0.0622806
chr1	27801678	27801970	293	0.0736632
chr1	27802387	27802882	496	0.0682068
chr1	27852511	27853016	506	0.0615931
chr1	27886707	27887632	926	0.0700233
chr1	27890793	27892093	1301	0.0683516
chr1	27892695	27894010	1316	0.0774412
chr1	27897917	27899541	1625	0.0820469
chr1	27951634	27952217	584	0.0581347
chr1	27961200	27962114	915	0.0795998
chr1	27975163	27975919	757	0.0578717
chr1	27977641	27978162	522	0.0600792
chr1	27986951	27987420	470	0.129096
chr1	28000662	28000742	81	0.0718082
chr1	28195153	28195487	335	0.0618811
chr1	28201829	28202857	1029	0.0805405
chr1	28429556	28429705	150	0.0785783
chr1	28461613	28463048	1436	0.0927569
chr1	28463364	28463556	193	0.0938009
chr1	28482113	28482498	386	0.0849343
chr1	28490443	28491400	958	0.10892
chr1	28492020	28492280	261	0.107646
chr1	28500054	28500513	460	0.0565151
chr1	28509950	28510257	308	0.0562232
chr1	28523850	28524669	820	0.0578952
chr1	28525063	28526364	1302	0.0733847
chr1	28537217	28537418	202	0.0600407
chr1	28590117	28591301	1185	0.0995119
chr1	28656303	28657116	814	0.0993312
chr1	28698085	28698259	175	0.0817688
chr1	28698685	28698850	166	0.0768015
chr1	28709093	28709109	17	0.0665183
chr1	28718409	28718821	413	0.0706489
chr1	28728256	28728379	124	0.0819066
chr1	28756564	28757171	608	0.0544178
chr1	28764523	28764921	399	0.0719314
chr1	28928689	28929156	468	0.0490178
chr1	28981450	28981490	41	0.0736615
chr1	28984211	28984656	446	0.0614601
chr1	28987804	28988328	525	0.0568512
chr1	28998878	28999831	954	0.076308
chr1	29078604	29079230	627	0.0737467
chr1	29106502	29106693	192	0.0625481
chr1	29171578	29171906	329	0.0573875
chr1	29172435	29172965	531	0.0662756
chr1	29173582	29173624	43	0.0528383
chr1	29177659	29178154	496	0.0581546
chr1	29215014	29215438	425	0.0547246
chr1	29224304	29224616	313	0.0593764
chr1	29225000	29226118	1119	0.0689398
chr1	29226468	29226603	136	0.0705126
chr1	29252183	29252491	309	0.0920878
chr1	29252980	29253011	32	0.128614
chr1	29284817	29285760	944	0.0722852
chr1	29362728	29363072	345	0.0544126
chr1	29410569	29410999	431	0.0679211
chr1	29437894	29438228	335	0.0656256
chr1	29441965	29442448	484	0.0506779
chr1	29476663	29476699	37	0.0578177
chr1	29586844	29587679	836	0.0646304
chr1	29721394	29722240	847	0.04789
chr1	30123503	30124051	549	0.0756807
chr1	30356793	30357102	310	0.0474084
chr1	30407224	30408002	779	0.0463411
chr1	30439886	30440656	771	0.0719816
chr1	30510731	30511431	701	0.0461682
chr1	30607895	30609126	1232	0.0615806
chr1	30663146	30663928	783	0.0525493
chr1	30664690	30665328	639	0.0588765
chr1	30774963	30775786	824	0.056542
chr1	30789873	30790155	283	0.054127
chr1	31120972	31120999	28	0.0479369
chr1	31177845	31179914	2070	0.0744711
chr1	31219025	31220242	1218	0.0990068
chr1	31227711	31228006	296	0.0577913
chr1	31266991	31267165	175	0.0562051
chr1	31313862	31314867	1006	0.0573034
chr1	31340652	31340965	314	0.0522325
chr1	31355767	31356622	856	0.0600971
chr1	31373723	31376830	3108	0.0675574
chr1	31379007	31380209	1203	0.0779791
chr1	31402412	31404063	1652	0.0690509
chr1	31429399	31429406	8	0.0556094
chr1	31470574	31470860	287	0.0521558
chr1	31471209	31471363	155	0.0515221
chr1	31502560	31503690	1131	0.101559
chr1	31522090	31522401	312	0.079742
chr1	31523819	31524180	362	0.0807209
chr1	31532276	31532529	254	0.0648536
chr1	31572173	31573587	1415	0.0988737
chr1	31583246	31583875	630	0.0810782
chr1	31585422	31585963	542	0.0626106
chr1	31671353	31672039	687	0.0572703
chr1	31689754	31690388	635	0.0573357
chr1	31762083	31762382	300	0.060966
chr1	31767467	31768309	843	0.0836229
chr1	31780395	31780826	432	0.0803718
chr1	31792176	31792450	275	0.0610487
chr1	31907964	31909067	1104	0.0491606
chr1	31909581	31910497	917	0.0476609
chr1	31914201	31915097	897	0.0650369
chr1	31973181	31974774	1594	0.0740707
chr1	31975579	31977514	1936	0.078733
chr1	32041605	32043427	1823	0.064439
chr1	32048901	32051009	2109	0.0705368
chr1	32101082	32101945	864	0.0483869
chr1	32104830	32105393	564	0.0523082
chr1	32141364	32141673	310	0.052749
chr1	32218872	32219327	456	0.0602078
chr1	32260256	32260582	327	0.047474
chr1	32261273	32262582	1310	0.0515181
chr1	32299916	32300888	973	0.0554252
chr1	32358702	32359595	894	0.0520313
chr1	32385224	32385449	226	0.0682011
chr1	32396602	32396829	228	0.108206
chr1	32400435	32401046	612	0.113502
chr1	32451684	32451725	42	0.0636882
chr1	32484352	32484564	213	0.0775453
chr1	32491193	32491967	775	0.08066
chr1	32511340	32511536	197	0.0584084
chr1	32531922	32532742	821	0.0850955
chr1	32539392	32539709	318	0.0624869
chr1	32646559	32647142	584	0.0568635
chr1	32653399	32654426	1028	0.0492977
chr1	32678786	32678959	174	0.0726421
chr1	32689637	32690055	419	0.0617596
chr1	32698128	32698755	628	0.0570356
chr1	32701076	32701211	136	0.0557022
chr1	32715320	32715850	531	0.0809169
chr1	32756514	32756884	371	0.110621
chr1	32775824	32776188	365	0.110448
chr1	32781233	32781293	61	0.0779146
chr1	32782181	32782357	177	0.0551975
chr1	32806152	32806453	302	0.0485549
chr1	32816181	32816725	545	0.0871684
chr1	32838215	32839422	1208	0.0578351
chr1	32864688	32864959	272	0.113662
chr1	32947701	32947995	295	0.0702737
chr1	33001555	33001815	261	0.0725075
chr1	33006981	33007453	473	0.0500143
chr1	33142460	33143027	568	0.0536263
chr1	33155087	33155535	449	0.0627242
chr1	33182943	33183539	597	0.0638892
chr1	33195278	33196119	842	0.0658769
chr1	33208348	33209666	1319	0.119532
chr1	33216701	33217355	655	0.0580791
chr1	33228864	33228974	111	0.0565348
chr1	33229464	33229617	154	0.0605812
chr1	33247211	33248307	1097	0.0864335
chr1	33248746	33248867	122	0.0496693
chr1	33265551	33266469	919	0.0641011
chr1	33309872	33310342	471	0.0785688
chr1	33364732	33364976	245	0.0475935
chr1	33418854	33418983	130	0.0743023
chr1	33419301	33420105	805	0.0633792
chr1	33446706	33447317	612	0.117391
chr1	33458476	33459385	910	0.0759168
chr1	33493822	33494097	276	0.061224
chr1	33643390	33643728	339	0.0898992
chr1	33723836	33725124	1289	0.0967055
chr1	33781905	33781940	36	0.0554291
chr1	33792614	33793901	1288	0.0952738
chr1	33797289	33799006	1718	0.0588962
chr1	33800782	33801268	487	0.116422
chr1	33801847	33801881	35	0.12126
chr1	33862127	33862579	453	0.0546613
chr1	33862890	33863535	646	0.0578135
chr1	33864306	33864522	217	0.0562972
chr1	33927658	33927731	74	0.0570949
chr1	33928164	33928890	727	0.0569316
chr1	34784914	34785275	362	0.093024
chr1	34989280	34989977	698	0.0527704
chr1	35028762	35029138	377	0.058466
chr1	35218455	35218806	352	0.0643997
chr1	35248524	35249384	861	0.0726277
chr1	35255139	35255241	103	0.0557759
chr1	35299860	35300119	260	0.0535537
chr1	35303228	35303581	354	0.0791889
chr1	35303928	35304446	519	0.0859948
chr1	35305062	35306287	1226	0.0542615
chr1	35311828	35312437	610	0.0538207
chr1	35448775	35449720	946	0.0881668
chr1	35545948	35546150	203	0.0649602
chr1	35588734	35588904	171	0.0584557
chr1	35642188	35642542	355	0.0629725
chr1	35652398	35652851	454	0.0896556
chr1	35689001	35689357	357	0.0897096
chr1	35919432	35920411	980	0.0879995
chr1	35921459	35921502	44	0.0523547
chr1	35971832	35972529	698	0.063656
chr1	36007240	36007761	522	0.0629955
chr1	36045022	36045325	304	0.0516678
chr1	36104222	36104335	114	0.163854
chr1	36111011	36111164	154	0.0971051
chr1	36225722	36226216	495	0.0575101
chr1	36236444	36236516	73	0.101075
chr1	36474338	36475100	763	0.081582
chr1	36576215	36576910	696	0.0786239
chr1	36591424	36592600	1177	0.0516479
chr1	36635809	36636238	430	0.06215
chr1	36719691	36719877	187	0.130055
chr1	36720951	36721097	147	0.0728029
chr1	36724099	36724483	385	0.072916
chr1	36741387	36741529	143	0.0720896
chr1	36742997	36744033	1037	0.0902825
chr1	36786010	36786294	285	0.0581364
chr1	36804294	36804315	22	0.0861177
chr1	36804664	36805554	891	0.0642103
chr1	36835127	36835418	292	0.0633877
chr1	36838474	36839128	655	0.103863
chr1	36843958	36844595	638	0.0917425
chr1	36848432	36849532	1101	0.103464
chr1	36858878	36858958	81	0.0484554
chr1	36897769	36898463	695	0.0599939
chr1	36918613	36918674	62	0.0468708
chr1	36940635	36940903	269	0.0524031
chr1	36982113	36982711	599	0.0662475
chr1	37115025	37116740	1716	0.0612388
chr1	37804258	37804608	351	0.0611239
chr1	37940953	37941428	476	0.0776325
chr1	37945632	37946297	666	0.0878066
chr1	37949614	37951682	2069	0.0731785
chr1	37953124	37953159	36	0.0497229
chr1	37953502	37953609	108	0.0578167
chr1	38030006	38030277	272	0.0864341
chr1	38049018	38049373	356	0.0570699
chr1	38277385	38277724	340	0.0558809
chr1	38285349	38285398	50	0.0527703
chr1	38285758	38286044	287	0.0667805
chr1	38309710	38310056	347	0.0608702
chr1	38310722	38310810	89	0.0776082
chr1	38311116	38311531	416	0.0729813
chr1	38312675	38312769	95	0.0488554
chr1	38342665	38342874	210	0.0542269
chr1	38599368	38599947	580	0.0668935
chr1	38638068	38638278	211	0.063544
chr1	38684106	38684609	504	0.0459739
chr1	39441509	39441794	286	0.0771657
chr1	39442619	39442772	154	0.0955478
chr1	39491278	39491459	182	0.0829362
chr1	39514769	39515627	859	0.0620464
chr1	39556956	39558018	1063	0.0714692
chr1	39569887	39570479	593	0.118804
chr1	39591682	39592187	506	0.0686294
chr1	39592715	39593006	292	0.0724766
chr1	39643073	39644586	1514	0.100194
chr1	39650701	39651055	355	0.0698907
chr1	39663237	39663557	321	0.0902886
chr1	39664688	39665051	364	0.115433
chr1	39677629	39678106	478	0.0905315
chr1	39693969	39694114	146	0.0736821
chr1	39701035	39701288	254	0.0495793
chr1	39811462	39811477	16	0.0590793
chr1	39825278	39825469	192	0.0572579
chr1	39835992	39836390	399	0.0560454
chr1	39838626	39839091	466	0.0751368
chr1	39855799	39856185	387	0.0790048
chr1	39859903	39860719	817	0.129994
chr1	39864170	39864378	209	0.0600216
chr1	39918417	39918428	12	0.0550912
chr1	39927601	39927700	100	0.0483222
chr1	39941968	39942024	57	0.0558414
chr1	39942501	39942671	171	0.0593844
chr1	39943128	39943312	185	0.0649516
chr1	40036461	40037037	577	0.0601631
chr1	40037340	40037881	542	0.0796236
chr1	40039030	40039261	232	0.0571737
chr1	40118734	40120156	1423	0.0652681
chr1	40283380	40284043	664	0.0687296
chr1	40292489	40293276	788	0.0691991
chr1	40308146	40308220	75	0.113648
chr1	40308552	40308968	417	0.129631
chr1	40414745	40415107	363	0.0527516
chr1	40418159	40418653	495	0.0685692
chr1	40419022	40419793	772	0.0597787
chr1	40421823	40422169	347	0.0880866
chr1	40480307	40480502	196	0.0653985
chr1	40513222	40513979	758	0.0755614
chr1	40519408	40520866	1459	0.0992755
chr1	40632789	40633663	875	0.0669459
chr1	40700755	40701199	445	0.0522847
chr1	40783264	40783809	546	0.0648667
chr1	40805521	40805939	419	0.11131
chr1	40806571	40806794	224	0.116448
chr1	40807398	40807466	69	0.079602
chr1	40808460	40808963	504	0.0766267
chr1	40843819	40843968	150	0.0907504
chr1	40846919	40847230	312	0.109623
chr1	40858493	40858537	45	0.0990986
chr1	40861748	40862240	493	0.126861
chr1	40889740	40890907	1168	0.0561656
chr1	40945066	40945345	280	0.0484121
chr1	41054985	41055029	45	0.0467952
chr1	41060816	41061706	891	0.0578647
chr1	41070267	41070811	545	0.0627646
chr1	41160677	41161003	327	0.0841471
chr1	41161372	41161609	238	0.0859643
chr1	41162111	41162330	220	0.0963793
chr1	41171457	41171709	253	0.0791015
chr1	41195370	41196379	1010	0.129004
chr1	41224386	41225340	955	0.0638318
chr1	41228038	41228531	494	0.0531642
chr1	41229310	41229583	274	0.0635087
chr1	41229900	41230183	284	0.0520313
chr1	41312288	41313092	805	0.0646648
chr1	41328935	41329886	952	0.0631106
chr1	41418523	41419083	561	0.147921
chr1	41431935	41433868	1934	0.0798948
chr1	41484815	41485740	926	0.0703281
chr1	41498872	41499432	561	0.0509993
chr1	41509619	41510278	660	0.064516
chr1	41568906	41569442	537	0.0616813
chr1	41704364	41705509	1146	0.0982079
chr1	41826028	41826521	494	0.0698217
chr1	41881573	41881821	249	0.0526464
chr1	41883496	41885657	2162	0.0664064
chr1	41896896	41897803	908	0.0776217
chr1	41942576	41944065	1490	0.0958145
chr1	41964007	41964419	413	0.0665407
chr1	41967410	41968000	591	0.047937
chr1	41980170	41980996	827	0.0830842
chr1	42124967	42126152	1186	0.0573707
chr1	42146916	42148610	1695	0.0596642
chr1	42160754	42160889	136	0.0509839
chr1	42187119	42187977	859	0.0627693
chr1	42194074	42194900	827	0.0726302
chr1	42253727	42254238	512	0.0614343
chr1	42254633	42254835	203	0.071335
chr1	42267288	42267710	423	0.0691393
chr1	42288276	42288604	329	0.0579012
chr1	42289221	42289493	273	0.0687316
chr1	42289926	42290197	272	0.0662281
chr1	42369819	42370241	423	0.0528426
chr1	42424219	42424962	744	0.0504999
chr1	42599994	42601304	1311	0.0652137
chr1	42616577	42617590	1014	0.0636703
chr1	42617893	42618536	644	0.0577561
chr1	42657023	42657233	211	0.058832
chr1	42657757	42657859	103	0.0509644
chr1	42675767	42677327	1561	0.0677032
chr1	42792832	42792982	151	0.067259
chr1	42793504	42793881	378	0.0547064
chr1	43153289	43153861	573	0.0663521
chr1	43202674	43203358	685	0.0875924
chr1	43210640	43211624	985	0.089238
chr1	43250498	43250820	323	0.0665092
chr1	43313869	43313964	96	0.0525143
chr1	43399864	43400423	560	0.0523404
chr1	43401524	43401973	450	0.0584731
chr1	43402340	43405531	3192	0.0603681
chr1	43408559	43411175	2617	0.0634729
chr1	43427192	43428442	1251	0.0772387
chr1	43430445	43431180	736	0.133436
chr1	43538741	43539887	1147	0.0603227
chr1	43628699	43629025	327	0.0558039
chr1	43641923	43642555	633	0.0573254
chr1	43680733	43681270	538	0.0571955
chr1	43681729	43682657	929	0.051903
chr1	43689706	43691581	1876	0.0995617
chr1	43692270	43692660	391	0.0910561
chr1	43703110	43703764	655	0.0641822
chr1	43741454	43741905	452	0.0811583
chr1	43743215	43745203	1989	0.0864319
chr1	43754460	43755588	1129	0.055246
chr1	43768332	43768553	222	0.0755733
chr1	43768867	43769895	1029	0.0805124
chr1	43800261	43801592	1332	0.0735856
chr1	43813510	43813967	458	0.0724812
chr1	43825614	43826960	1347	0.0814272
chr1	43828595	43829648	1054	0.0840887
chr1	43850018	43850329	312	0.0564609
chr1	43870806	43871666	861	0.0451651
chr1	43894427	43894648	222	0.0449415
chr1	43900871	43901596	726	0.0556757
chr1	43916952	43917339	388	0.0555029
chr1	43930578	43931948	1371	0.0662537
chr1	43932348	43932603	256	0.0674359
chr1	43963764	43964131	368	0.0722639
chr1	43971928	43972326	399	0.0482655
chr1	44005591	44007699	2109	0.0871533
chr1	44008462	44008915	454	0.0571025
chr1	44038091	44039697	1607	0.0615371
chr1	44050976	44052278	1303	0.0688839
chr1	44069609	44070435	827	0.0497623
chr1	44087703	44088069	367	0.0470078
chr1	44105104	44105209	106	0.0653922
chr1	44105548	44105789	242	0.0669425
chr1	44117093	44117319	227	0.0898694
chr1	44134085	44134473	389	0.0500257
chr1	44134784	44134940	157	0.0468676
chr1	44152823	44153339	517	0.0905841
chr1	44153833	44154321	489	0.11197
chr1	44154668	44155475	808	0.0847961
chr1	44170118	44171807	1690	0.0784259
chr1	44395252	44396666	1415	0.0600901
chr1	44411328	44411569	242	0.0465666
chr1	44529621	44529678	58	0.0499322
chr1	44535115	44535676	562	0.0852059
chr1	44592451	44592713	263	0.0561713
chr1	44688756	44690170	1415	0.0604833
chr1	44737547	44737764	218	0.0491982
chr1	44738568	44738978	411	0.0540898
chr1	44739923	44740115	193	0.0479096
chr1	44748450	44748912	463	0.0902899
chr1	44749596	44749902	307	0.0648534
chr1	44822961	44823314	354	0.0668663
chr1	44887895	44888866	972	0.0758037
chr1	44889376	44889741	366	0.0843261
chr1	44890167	44891298	1132	0.0755335
chr1	44896821	44896893	73	0.0932675
chr1	44987949	44988973	1025	0.0535604
chr1	45028722	45029462	741	0.0485428
chr1	45062328	45062494	167	0.0712203
chr1	45118480	45118912	433	0.0801263
chr1	45130290	45131034	745	0.0931737
chr1	45149268	45149824	557	0.0625483
chr1	45197686	45198007	322	0.102884
chr1	45199868	45199991	124	0.0614646
chr1	45250717	45251015	299	0.0862869
chr1	45267159	45269108	1950	0.0844962
chr1	45276930	45277159	230	0.079645
chr1	45300773	45301555	783	0.0645847
chr1	45501369	45501825	457	0.0627294
chr1	45661672	45662084	413	0.0589897
chr1	45727513	45728281	769	0.0642733
chr1	45806797	45807214	418	0.06383
chr1	45814632	45815064	433	0.0717324
chr1	45899885	45900266	382	0.0508079
chr1	45909228	45909592	365	0.0615078
chr1	45910725	45911176	452	0.119832
chr1	45927613	45927848	236	0.0699045
chr1	45963190	45963244	55	0.0566204
chr1	45972131	45973211	1081	0.102646
chr1	46015404	46016132	729	0.135985
chr1	46082406	46083754	1349	0.0755191
chr1	46113067	46114437	1371	0.0630252
chr1	46142580	46143005	426	0.0804231
chr1	46144754	46145067	314	0.133234
chr1	46390863	46390976	114	0.0970812
chr1	46392314	46392645	332	0.117262
chr1	46425062	46426095	1034	0.0518713
chr1	46467171	46467421	251	0.0790153
chr1	46467777	46468082	306	0.081752
chr1	46468487	46468747	261	0.0598127
chr1	46501619	46502036	418	0.0581482
chr1	46578365	46578901	537	0.0559241
chr1	46632871	46633088	218	0.0487765
chr1	46639271	46639632	362	0.0567567
chr1	46644857	46646141	1285	0.0798642
chr1	46648313	46649464	1152	0.0760457
chr1	46671189	46672195	1007	0.0783508
chr1	46807095	46807772	678	0.060484
chr1	46841494	46841516	23	0.0578604
chr1	46867049	46868214	1166	0.123892
chr1	46878209	46879549	1341	0.0562167
chr1	46887191	46887513	323	0.0634385
chr1	46935513	46936085	573	0.0536338
chr1	46960006	46960567	562	0.0778714
chr1	46992265	46992853	589	0.0506692
chr1	47038169	47039006	838	0.0554866
chr1	47066868	47067223	356	0.0528406
chr1	47081524	47081751	228	0.0766156
chr1	47090938	47091071	134	0.0712829
chr1	47233820	47234373	554	0.0464927
chr1	47485891	47486513	623	0.0610795
chr1	47494783	47494836	54	0.0976173
chr1	47654723	47655356	634	0.0714508
chr1	47657021	47657970	950	0.083356
chr1	47658399	47658778	380	0.0675036
chr1	47705984	47706141	158	0.0515711
chr1	47706826	47708198	1373	0.0637509
chr1	47813592	47813797	206	0.0720663
chr1	47854359	47854852	494	0.10441
chr1	47857739	47858084	346	0.0585256
chr1	47886754	47886968	215	0.0655771
chr1	47893357	47894074	718	0.0634327
chr1	47909338	47910181	844	0.0803816
chr1	47934141	47934581	441	0.0537369
chr1	47935570	47936728	1159	0.0619238
chr1	47944001	47945189	1189	0.0719751
chr1	47956929	47958232	1304	0.0534528
chr1	47980878	47981133	256	0.0483992
chr1	47986301	47987667	1367	0.0607436
chr1	47989026	47990377	1352	0.0685757
chr1	48011673	48012182	510	0.0559999
chr1	48059114	48059362	249	0.0543026
chr1	48059728	48059934	207	0.0960836
chr1	48083580	48084727	1148	0.060578
chr1	48085407	48085596	190	0.054299
chr1	48220069	48221650	1582	0.075491
chr1	48278469	48279873	1405	0.0529226
chr1	48286376	48286793	418	0.0514544
chr1	48320092	48320326	235	0.0539566
chr1	48359144	48361230	2087	0.0585144
chr1	48420295	48420596	302	0.0509526
chr1	48463807	48465076	1270	0.0629777
chr1	48472586	48472619	34	0.0521115
chr1	48686075	48687022	948	0.0895017
chr1	48721319	48721864	546	0.0736595
chr1	48725186	48725307	122	0.073543
chr1	48965502	48965885	384	0.095471
chr1	49119734	49120710	977	0.0646714
chr1	49266586	49267056	471	0.0648583
chr1	49267512	49267796	285	0.0673441
chr1	49517081	49517474	394	0.0747124
chr1	49690007	49690603	597	0.054548
chr1	50637736	50637903	168	0.0630323
chr1	50681263	50682197	935	0.0705776
chr1	50682773	50683442	670	0.0915835
chr1	50819673	50819840	168	0.05322
chr1	51288697	51288979	283	0.0768754
chr1	51431994	51432010	17	0.0468639
chr1	51552565	51553609	1045	0.057475
chr1	51676097	51676202	106	0.0645557
chr1	51705841	51706591	751	0.168422
chr1	51707102	51707424	323	0.145115
chr1	51708354	51708471	118	0.0923842
chr1	51722167	51723290	1124	0.0595735
chr1	51746417	51747275	859	0.0827271
chr1	51780282	51782987	2706	0.0712186
chr1	51797193	51797890	698	0.0603401
chr1	51811317	51811427	111	0.0634683
chr1	52023255	52023419	165	0.0833205
chr1	52104910	52105258	349	0.0938814
chr1	52132416	52132643	228	0.0589576
chr1	52151258	52151868	611	0.0777699
chr1	52250688	52251297	610	0.0609419
chr1	52257736	52258575	840	0.0613911
chr1	52258943	52259776	834	0.078886
chr1	52309806	52310170	365	0.0851441
chr1	52422353	52422674	322	0.0780458
chr1	52424093	52424161	69	0.0668212
chr1	52424685	52424813	129	0.0520332
chr1	52497119	52497446	328	0.0871611
chr1	52517340	52517465	126	0.0593658
chr1	52730129	52730643	515	0.058377
chr1	52779039	52779137	99	0.0458081
chr1	52795069	52795601	533	0.0584353
chr1	52803374	52803741	368	0.0574254
chr1	52811772	52812039	268	0.07067
chr1	52812445	52813736	1292	0.0627418
chr1	52906363	52906467	105	0.0608942
chr1	52906875	52907611	737	0.0511268
chr1	53005118	53005451	334	0.0533526
chr1	53016235	53016446	212	0.163274
chr1	53114545	53115222	678	0.0572231
chr1	53127087	53127264	178	0.0490529
chr1	53141538	53142559	1022	0.0575161
chr1	53145221	53145415	195	0.0599099
chr1	53172628	53172770	143	0.0753707
chr1	53204577	53204892	316	0.075905
chr1	53242874	53243271	398	0.0577439
chr1	53243708	53243743	36	0.0508418
chr1	53260645	53260966	322	0.058637
chr1	53261345	53261446	102	0.0634739
chr1	53299276	53299627	352	0.0758889
chr1	53366569	53366900	332	0.123789
chr1	53383452	53384208	757	0.108282
chr1	53385926	53386088	163	0.0892613
chr1	53390547	53390878	332	0.0972131
chr1	53405593	53405946	354	0.123887
chr1	53454656	53454954	299	0.0848943
chr1	53486558	53486885	328	0.073839
chr1	53499701	53500110	410	0.0538596
chr1	53535599	53536111	513	0.0522148
chr1	53559749	53560094	346	0.0542757
chr1	53573840	53574533	694	0.0765712
chr1	53582365	53583771	1407	0.0541334
chr1	53610005	53610215	211	0.102246
chr1	53639364	53639442	79	0.0567457
chr1	53640818	53642611	1794	0.0657767
chr1	53655939	53656516	578	0.0755248
chr1	53657041	53657415	375	0.0812489
chr1	53666564	53666831	268	0.0551641
chr1	53782426	53783332	907	0.0586543
chr1	53790440	53790543	104	0.0489339
chr1	53794542	53795917	1376	0.0718086
chr1	53857106	53857596	491	0.0574338
chr1	53991004	53991596	593	0.0752882
chr1	54007864	54008193	330	0.0521491
chr1	54048110	54048835	726	0.0538164
chr1	54114944	54115173	230	0.0703668
chr1	54115858	54115988	131	0.0682102
chr1	54116404	54116483	80	0.0482641
chr1	54129266	54130015	750	0.0511831
chr1	54133407	54133734	328	0.0539715
chr1	54134183	54134521	339	0.0484007
chr1	54301889	54302422	534	0.0660374
chr1	54309163	54309516	354	0.0522796
chr1	54343607	54344008	402	0.060972
chr1	54351037	54352439	1403	0.0955469
chr1	54362877	54363730	854	0.0760864
chr1	54368825	54369186	362	0.051459
chr1	54375455	54376034	580	0.122413
chr1	54424218	54424580	363	0.0568858
chr1	54493748	54494325	578	0.0571651
chr1	54589516	54589982	467	0.0604611
chr1	54594956	54596077	1122	0.0572978
chr1	54613329	54613407	79	0.0708508
chr1	54618399	54619445	1047	0.0905422
chr1	54684363	54686254	1892	0.0715112
chr1	54688814	54689218	405	0.0485465
chr1	54692883	54693089	207	0.0553377
chr1	54732539	54734151	1613	0.0486888
chr1	54736945	54737721	777	0.0854996
chr1	54763866	54765821	1956	0.0595284
chr1	54789040	54790084	1045	0.0646122
chr1	54798852	54799496	645	0.0602752
chr1	54800408	54801355	948	0.0890656
chr1	54819663	54820496	834	0.0833729
chr1	54824363	54826150	1788	0.0707323
chr1	54830400	54831959	1560	0.064808
chr1	54836620	54837105	486	0.0635778
chr1	54841298	54842464	1167	0.0861531
chr1	54849037	54849507	471	0.0881961
chr1	54850469	54850873	405	0.0898509
chr1	54851306	54853658	2353	0.0687955
chr1	54853994	54854560	567	0.0603285
chr1	54859814	54860237	424	0.0576707
chr1	54869007	54870306	1300	0.0674045
chr1	54874998	54875282	285	0.0792295
chr1	54938716	54938943	228	0.0528789
chr1	54963950	54964484	535	0.167808
chr1	55012824	55012989	166	0.0692992
chr1	55053609	55054531	923	0.100747
chr1	55062955	55063014	60	0.0495559
chr1	55063398	55063608	211	0.058283
chr1	55064202	55064384	183	0.0540688
chr1	55081068	55081819	752	0.064175
chr1	55106106	55107533	1428	0.0610009
chr1	55116389	55117812	1424	0.073758
chr1	55118566	55119011	446	0.0565334
chr1	55194700	55194871	172	0.0513095
chr1	55195673	55196098	426	0.0526065
chr1	55240609	55241005	397	0.0570949
chr1	55273159	55274404	1246	0.0660419
chr1	55308576	55309051	476	0.0591757
chr1	55310485	55311819	1335	0.0673192
chr1	55315786	55315958	173	0.0563636
chr1	55316417	55316530	114	0.0469885
chr1	55320320	55322040	1721	0.0669362
chr1	55322822	55323192	371	0.0790523
chr1	55323503	55323837	335	0.101321
chr1	55435309	55435379	71	0.0567743
chr1	55466577	55467226	650	0.0732196
chr1	55509909	55510826	918	0.065323
chr1	55514366	55515040	675	0.0792628
chr1	55520142	55521477	1336	0.0963062
chr1	55588026	55588426	401	0.0457668
chr1	55677707	55678810	1104	0.108129
chr1	55742383	55743343	961	0.0722443
chr1	55750815	55751163	349	0.0538234
chr1	55813210	55814244	1035	0.0670943
chr1	55958055	55958207	153	0.0460196
chr1	56192240	56192883	644	0.0535882
chr1	56200443	56200593	151	0.0793127
chr1	56802293	56802752	460	0.069474
chr1	56867131	56867382	252	0.0645078
chr1	56867907	56868171	265	0.0586524
chr1	56871204	56871630	427	0.0579072
chr1	56880586	56881597	1012	0.0618971
chr1	56883644	56884252	609	0.054219
chr1	56897797	56899323	1527	0.108019
chr1	56899685	56901000	1316	0.0983405
chr1	56914194	56915104	911	0.0906371
chr1	56916938	56917452	515	0.107944
chr1	56926991	56927033	43	0.061135
chr1	56927555	56928117	563	0.0654033
chr1	56928474	56928904	431	0.0628673
chr1	56956047	56956444	398	0.109823
chr1	56966234	56966902	669	0.10378
chr1	56967415	56967679	265	0.151399
chr1	56972439	56973338	900	0.0605184
chr1	56976853	56978041	1189	0.0761212
chr1	56983924	56984227	304	0.0539639
chr1	56991493	56991905	413	0.0834277
chr1	56992372	56992657	286	0.0863892
chr1	57000038	57000505	468	0.0567308
chr1	57001008	57001816	809	0.0535492
chr1	57024838	57024866	29	0.087298
chr1	57036709	57037201	493	0.104984
chr1	57046407	57046577	171	0.0548139
chr1	57049317	57049493	177	0.0961651
chr1	57242351	57242519	169	0.0891425
chr1	57363050	57363518	469	0.0948384
chr1	57367532	57367893	362	0.117375
chr1	57369837	57370160	324	0.10623
chr1	57370548	57372010	1463	0.0926752
chr1	57379599	57379697	99	0.0635764
chr1	57392158	57392395	238	0.0668381
chr1	57408001	57408140	140	0.0800095
chr1	57408455	57409718	1264	0.0875906
chr1	57410064	57410478	415	0.0826943
chr1	57425055	57426569	1515	0.086554
chr1	57427032	57427872	841	0.0689009
chr1	57499361	57499672	312	0.0505031
chr1	57557586	57557945	360	0.0457363
chr1	57816813	57817166	354	0.0506787
chr1	58221474	58221806	333	0.0713846
chr1	58555498	58556197	700	0.0555929
chr1	58921702	58922251	550	0.0832743
chr1	58922581	58923275	695	0.0694898
chr1	59033548	59033918	371	0.0522928
chr1	59034277	59034351	75	0.0477789
chr1	59114374	59114768	395	0.0976031
chr1	59244378	59244712	335	0.116126
chr1	59311680	59312492	813	0.0906406
chr1	59347756	59348560	805	0.0750806
chr1	59349057	59349384	328	0.0629223
chr1	59349691	59349804	114	0.069472
chr1	59350351	59351445	1095	0.079193
chr1	59352304	59352716	413	0.112278
chr1	59353599	59353783	185	0.0614412
chr1	59361426	59362552	1127	0.114385
chr1	59362893	59363346	454	0.150991
chr1	59364179	59364917	739	0.0670551
chr1	59365258	59365912	655	0.0845521
chr1	59366223	59366249	27	0.0874005
chr1	59370604	59371374	771	0.101245
chr1	59406901	59407352	452	0.0672576
chr1	59407689	59407753	65	0.0719885
chr1	59408439	59408714	276	0.0511416
chr1	59444497	59444977	481	0.096741
chr1	59453712	59454085	374	0.0557269
chr1	59472614	59473023	410	0.0460018
chr1	59475732	59476009	278	0.0469837
chr1	59492032	59492654	623	0.0484203
chr1	59493064	59493592	529	0.0481124
chr1	59505958	59506613	656	0.088844
chr1	59507861	59507915	55	0.0883179
chr1	59536771	59537759	989	0.0865837
chr1	59538145	59538544	400	0.0741315
chr1	59663991	59664430	440	0.0494536
chr1	59665393	59665861	469	0.0618579
chr1	59666579	59666755	177	0.0745517
chr1	59679946	59680037	92	0.0544288
chr1	59680352	59680756	405	0.0469498
chr1	59758824	59759312	489	0.0808601
chr1	59810335	59810358	24	0.0917204
chr1	59811493	59812161	669	0.0838011
chr1	59847654	59848046	393	0.0482292
chr1	59856673	59857377	705	0.0690183
chr1	59858019	59858079	61	0.0464734
chr1	59869877	59871403	1527	0.0582801
chr1	59877663	59878225	563	0.0579636
chr1	59900143	59900381	239	0.0857542
chr1	59900688	59902022	1335	0.0653849
chr1	59941381	59942168	788	0.0763435
chr1	59944987	59946178	1192	0.0698401
chr1	59947108	59947598	491	0.0585983
chr1	59970545	59970800	256	0.0722916
chr1	59971357	59971726	370	0.0592357
chr1	60025675	60025755	81	0.0731779
chr1	60026940	60027289	350	0.0956125
chr1	60036324	60036867	544	0.0640519
chr1	60065630	60066413	784	0.0818499
chr1	60066734	60067054	321	0.071781
chr1	60089005	60089468	464	0.0602749
chr1	60089974	60090220	247	0.0593334
chr1	60120464	60120980	517	0.0495082
chr1	60131634	60131676	43	0.0993557
chr1	60134931	60135054	124	0.045727
chr1	60135508	60135608	101	0.0608873
chr1	60135962	60136469	508	0.0788327
chr1	60138676	60140007	1332	0.101829
chr1	60140450	60140835	386	0.108258
chr1	60142453	60142787	335	0.116299
chr1	60166538	60167357	820	0.102428
chr1	60167794	60167898	105	0.0933099
chr1	60172904	60173734	831	0.0803217
chr1	60175083	60175307	225	0.0621814
chr1	60198409	60199004	596	0.062667
chr1	60211399	60211700	302	0.0485368
chr1	60213062	60213133	72	0.0623444
chr1	60214323	60214979	657	0.0545408
chr1	60402042	60402430	389	0.0779298
chr1	60404891	60405748	858	0.0667233
chr1	60418583	60419407	825	0.0553675
chr1	60439777	60440183	407	0.0592782
chr1	60542972	60543166	195	0.065655
chr1	60681873	60682093	221	0.0576278
chr1	60725495	60726064	570	0.0569714
chr1	61388771	61389285	515	0.0941537
chr1	61389594	61389894	301	0.0829039
chr1	61390214	61390591	378	0.0591559
chr1	61428005	61429625	1621	0.0588256
chr1	61459434	61460162	729	0.0750739
chr1	61519954	61520440	487	0.0931886
chr1	61554458	61554646	189	0.0542908
chr1	61562010	61562127	118	0.117032
chr1	61589860	61590354	495	0.121542
chr1	61604971	61605691	721	0.0803956
chr1	61606418	61607055	638	0.0920094
chr1	61612315	61612848	534	0.0793454
chr1	61615802	61617382	1581	0.0964453
chr1	61627894	61628400	507	0.0768562
chr1	61638517	61638894	378	0.079993
chr1	61639313	61640020	708	0.0802434
chr1	61642764	61643095	332	0.0831943
chr1	61645162	61646190	1029	0.0615155
chr1	61653104	61653437	334	0.0648917
chr1	61655076	61656175	1100	0.0816243
chr1	61691210	61691324	115	0.0962044
chr1	61726023	61726547	525	0.0581743
chr1	61772995	61773244	250	0.0495083
chr1	61807282	61807709	428	0.108738
chr1	61821101	61821609	509	0.061958
chr1	61867259	61867496	238	0.0497444
chr1	61868099	61868578	480	0.0548524
chr1	61902906	61903582	677	0.0540989
chr1	61914798	61916280	1483	0.0615281
chr1	61929142	61929951	810	0.0645528
chr1	61936855	61937914	1060	0.0641193
chr1	61970730	61971260	531	0.0528315
chr1	61971684	61972011	328	0.0603504
chr1	62130323	62130579	257	0.0523104
chr1	62315732	62315871	140	0.0587405
chr1	62317086	62317711	626	0.0864292
chr1	62320188	62321283	1096	0.0549479
chr1	62510457	62510639	183	0.0891279
chr1	62595338	62595387	50	0.06781
chr1	62813558	62815060	1503	0.0983438
chr1	62817433	62817713	281	0.0722566
chr1	62867774	62867925	152	0.0464877
chr1	62889367	62890590	1224	0.0686262
chr1	63148948	63149804	857	0.0707325
chr1	63267038	63267277	240	0.0587792
chr1	63353364	63354144	781	0.0612626
chr1	63355327	63356272	946	0.0757304
chr1	63419236	63419560	325	0.0553128
chr1	63480239	63480435	197	0.0562069
chr1	63668735	63668804	70	0.0576124
chr1	63749593	63749776	184	0.0626179
chr1	63834983	63835037	55	0.0699403
chr1	64077297	64078623	1327	0.0870291
chr1	64111587	64111802	216	0.0691635
chr1	64133362	64135304	1943	0.0527539
chr1	64139950	64141236	1287	0.080099
chr1	64338769	64339067	299	0.0499685
chr1	64356951	64357584	634	0.0542998
chr1	64364698	64365008	311	0.0560975
chr1	64383255	64384535	1281	0.0605433
chr1	64399297	64399956	660	0.0511806
chr1	64400265	64400435	171	0.057588
chr1	64651038	64651177	140	0.101831
chr1	64696059	64696419	361	0.0544581
chr1	64902614	64902973	360	0.0548597
chr1	64964549	64965005	457	0.0702691
chr1	65001398	65001672	275	0.135636
chr1	65002150	65003218	1069	0.0859
chr1	65041384	65041818	435	0.0470805
chr1	65061262	65061490	229	0.0514497
chr1	65065886	65066150	265	0.105279
chr1	65067086	65067332	247	0.0921551
chr1	65080243	65080831	589	0.0656075
chr1	65313289	65314738	1450	0.0559909
chr1	65332599	65332758	160	0.0561438
chr1	65339121	65339649	529	0.0727912
chr1	65340569	65341060	492	0.049033
chr1	65344714	65344790	77	0.0539608
chr1	65345117	65345967	851	0.0661361
chr1	65358393	65358637	245	0.110476
chr1	65359820	65360889	1070	0.0975312
chr1	65361558	65361930	373	0.139122
chr1	65362344	65362732	389	0.139454
chr1	65378824	65378904	81	0.0755752
chr1	65385886	65386175	290	0.0658067
chr1	65391899	65393430	1532	0.0737987
chr1	65399040	65399610	571	0.117308
chr1	65411163	65412185	1023	0.106321
chr1	65423613	65424067	455	0.150842
chr1	65509684	65509847	164	0.0533787
chr1	65510158	65510416	259	0.0608531
chr1	65513461	65513734	274	0.069964
chr1	65514298	65515461	1164	0.0677815
chr1	65593557	65593926	370	0.0558266
chr1	65677578	65677769	192	0.055101
chr1	65678316	65678435	120	0.0600219
chr1	65719087	65719344	258	0.0616956
chr1	65744567	65745174	608	0.0790807
chr1	65806133	65806926	794	0.0491167
chr1	65888366	65889183	818	0.06965
chr1	66062936	66063039	104	0.0966245
chr1	66220776	66220794	19	0.095209
chr1	66266468	66266792	325	0.0564459
chr1	66417868	66418684	817	0.0508367
chr1	66718225	66718659	435	0.108045
chr1	66727547	66727677	131	0.0834582
chr1	66727989	66728262	274	0.0813427
chr1	66730349	66731586	1238	0.0731755
chr1	66741026	66741658	633	0.0705491
chr1	66767049	66768035	987	0.0861246
chr1	66779526	66779756	231	0.0735196
chr1	66780385	66780713	329	0.0676812
chr1	66848818	66849385	568	0.0542608
chr1	66860278	66861513	1236	0.0531988
chr1	67067948	67068144	197	0.0765537
chr1	67097928	67098281	354	0.0601903
chr1	67194953	67195388	436	0.109381
chr1	67204792	67204918	127	0.0569775
chr1	67278885	67279038	154	0.076173
chr1	67410597	67411474	878	0.102043
chr1	67470533	67472164	1632	0.079132
chr1	67526014	67526325	312	0.0756375
chr1	67527118	67527372	255	0.0624277
chr1	67603006	67603441	436	0.0600791
chr1	67906072	67906429	358	0.0925697
chr1	67948493	67948959	467	0.059962
chr1	67969495	67969876	382	0.0870041
chr1	67990360	67990457	98	0.062311
chr1	67998225	67998696	472	0.0986665
chr1	68027510	68028506	997	0.100031
chr1	68040601	68041593	993	0.077121
chr1	68078712	68079292	581	0.0525026
chr1	68158569	68159557	989	0.0543117
chr1	68165308	68166019	712	0.0530412
chr1	68187821	68188118	298	0.0542981
chr1	68268307	68268728	422	0.0583249
chr1	68278045	68279009	965	0.0738723
chr1	68389717	68389962	246	0.0798425
chr1	68393023	68393496	474	0.0521777
chr1	68450169	68450507	339	0.0482725
chr1	68679542	68679762	221	0.11591
chr1	68714806	68714900	95	0.0509053
chr1	68850486	68850713	228	0.0580897
chr1	68912239	68912686	448	0.0488244
chr1	68913266	68913519	254	0.0756507
chr1	68914113	68914717	605	0.0786822
chr1	69138832	69138904	73	0.0766881
chr1	69400614	69401292	679	0.0529352
chr1	69439365	69439721	357	0.0714641
chr1	69440209	69440380	172	0.0581038
chr1	70730619	70730849	231	0.0573742
chr1	70812463	70812502	40	0.0689756
chr1	70821623	70822141	519	0.0881783
chr1	70826136	70826327	192	0.0680805
chr1	70860483	70860546	64	0.0692464
chr1	70879613	70880627	1015	0.091202
chr1	70928703	70929030	328	0.062513
chr1	70929756	70929764	9	0.0761033
chr1	70951300	70951530	231	0.0535741
chr1	71139554	71139852	299	0.0515088
chr1	71450683	71450950	268	0.0612297
chr1	71748512	71748965	454	0.0624104
chr1	71960899	71961332	434	0.071364
chr1	74987781	74988194	414	0.0600604
chr1	75413423	75414184	762	0.0696437
chr1	75994644	75994856	213	0.0826901
chr1	76232757	76232908	152	0.0665955
chr1	76445726	76446022	297	0.0550313
chr1	76549058	76549134	77	0.0463797
chr1	76766474	76766544	71	0.0558543
chr1	76767763	76768341	579	0.0518087
chr1	77065682	77066605	924	0.0680859
chr1	77123536	77124092	557	0.0557638
chr1	77512726	77512899	174	0.0556978
chr1	77955514	77955698	185	0.0787639
chr1	77977858	77978204	347	0.0570644
chr1	78110624	78110706	83	0.0538796
chr1	78210286	78210563	278	0.0650347
chr1	78685740	78686357	618	0.057697
chr1	78941567	78942568	1002	0.0608095
chr1	79057835	79058097	263	0.0655217
chr1	79834939	79835249	311	0.0584607
chr1	81834110	81834492	383	0.0597909
chr1	81843232	81843577	346	0.073608
chr1	81843961	81844106	146	0.072387
chr1	82104603	82104652	50	0.0495393
chr1	82301667	82302176	510	0.079855
chr1	82356175	82356417	243	0.0732349
chr1	83040001	83040463	463	0.0817682
chr1	83273510	83273540	31	0.0556738
chr1	84018281	84018395	115	0.0758634
chr1	84195922	84196622	701	0.068444
chr1	84232252	84232620	369	0.0645383
chr1	84276495	84276684	190	0.047265
chr1	84721970	84722270	301	0.052107
chr1	84732644	84733020	377	0.078575
chr1	84738593	84739081	489	0.0929986
chr1	84741346	84741993	648	0.131068
chr1	84817149	84817574	426	0.0880476
chr1	84818316	84819066	751	0.0781262
chr1	84982235	84982706	472	0.0469092
chr1	85085589	85085686	98	0.113904
chr1	85303855	85304062	208	0.0736968
chr1	85304376	85304597	222	0.0692322
chr1	85360972	85361260	289	0.0846439
chr1	85817871	85818152	282	0.0529726
chr1	85871209	85871880	672	0.0686803
chr1	85875856	85876044	189	0.0842409
chr1	85876667	85877013	347	0.077582
chr1	85877412	85877671	260	0.0739809
chr1	85888460	85888560	101	0.0530785
chr1	85906151	85906963	813	0.089267
chr1	85911149	85911188	40	0.0707939
chr1	85911779	85912274	496	0.0630864
chr1	87236201	87236608	408	0.0843416
chr1	87246545	87246884	340	0.124268
chr1	87382873	87382939	67	0.0478418
chr1	87597041	87597369	329	0.0953988
chr1	87777206	87778014	809	0.0503816
chr1	87803387	87803650	264	0.0577493
chr1	88419449	88419677	229	0.0651549
chr1	88451641	88452381	741	0.111597
chr1	88664326	88664676	351	0.0795113
chr1	88752629	88753071	443	0.0509335
chr1	89112974	89113231	258	0.110641
chr1	89156936	89157424	489	0.0609503
chr1	89203012	89203645	634	0.0546109
chr1	89204846	89205091	246	0.0772385
chr1	89230265	89230287	23	0.0574087
chr1	89230708	89231434	727	0.0574151
chr1	89287031	89287250	220	0.053531
chr1	89357880	89357988	109	0.0963517
chr1	89429506	89429623	118	0.0641421
chr1	89455169	89455218	50	0.0630927
chr1	89573964	89574487	524	0.0579182
chr1	89580443	89580940	498	0.057382
chr1	89770936	89771360	425	0.0718881
chr1	89981715	89981834	120	0.0770659
chr1	89984598	89985277	680	0.0633971
chr1	90137019	90137275	257	0.0723676
chr1	90137953	90138264	312	0.0561311
chr1	90174828	90175141	314	0.0617397
chr1	90184627	90185349	723	0.062874
chr1	90223037	90223951	915	0.0651119
chr1	90245863	90245875	13	0.0580208
chr1	90289055	90289757	703	0.0802328
chr1	90306670	90307509	840	0.0885029
chr1	90344262	90344970	709	0.0608909
chr1	90356258	90356685	428	0.0519274
chr1	90402207	90402664	458	0.0945838
chr1	90445024	90445044	21	0.0705977
chr1	90447221	90447654	434	0.0857356
chr1	90506977	90507518	542	0.0756986
chr1	91415500	91415556	57	0.0688351
chr1	91424083	91424322	240	0.0573242
chr1	91439599	91439942	344	0.090513
chr1	91595661	91596462	802	0.0688558
chr1	91614393	91614501	109	0.0985864
chr1	91625246	91626164	919	0.0517081
chr1	91912815	91912835	21	0.0933062
chr1	91943322	91943694	373	0.071637
chr1	91965349	91965862	514	0.0843377
chr1	92035041	92036036	996	0.0605234
chr1	92101219	92102106	888	0.0606228
chr1	92139156	92139365	210	0.0596142
chr1	92149976	92150549	574	0.0870927
chr1	92150902	92151174	273	0.110262
chr1	92151772	92151927	156	0.122232
chr1	92184267	92184522	256	0.0526208
chr1	92213889	92215792	1904	0.0917113
chr1	92230710	92231038	329	0.0556868
chr1	92246410	92246752	343	0.0559071
chr1	92322722	92323358	637	0.0545376
chr1	92406986	92407007	22	0.0570576
chr1	92420450	92420765	316	0.0703511
chr1	92422719	92423036	318	0.0648953
chr1	92590791	92591155	365	0.0703443
chr1	92591563	92592092	530	0.0889927
chr1	92730968	92731231	264	0.060784
chr1	92959626	92960593	968	0.0715174
chr1	92969206	92970007	802	0.0569947
chr1	93155072	93155347	276	0.0656288
chr1	93193976	93194538	563	0.100293
chr1	93195663	93196061	399	0.0853767
chr1	93213650	93214103	454	0.104031
chr1	93282064	93282390	327	0.0749254
chr1	93304637	93304950	314	0.0990979
chr1	93379923	93380066	144	0.0581102
chr1	93428604	93429656	1053	0.0586865
chr1	93430345	93431480	1136	0.0753528
chr1	93556499	93556716	218	0.0609803
chr1	93597044	93597647	604	0.0573442
chr1	93647900	93648012	113	0.0583251
chr1	93795977	93796377	401	0.0618235
chr1	94044088	94045537	1450	0.048428
chr1	94059574	94060744	1171	0.0650497
chr1	94061155	94062402	1248	0.0691182
chr1	94072100	94072752	653	0.0765066
chr1	94074463	94076559	2097	0.0627682
chr1	94080251	94081628	1378	0.0675237
chr1	94089864	94090495	632	0.0629245
chr1	94093792	94094284	493	0.121527
chr1	94094803	94094932	130	0.115053
chr1	94137729	94138684	956	0.0515655
chr1	94144214	94144679	466	0.0575251
chr1	94156926	94157085	160	0.0649414
chr1	94157436	94158327	892	0.0661198
chr1	94177485	94178237	753	0.0811977
chr1	94233618	94234819	1202	0.0588643
chr1	94283507	94284050	544	0.0559166
chr1	94436263	94436610	348	0.0740542
chr1	94458659	94459036	378	0.065883
chr1	94459427	94459731	305	0.0972555
chr1	94486035	94486992	958	0.092581
chr1	94487404	94488040	637	0.10402
chr1	94505567	94505861	295	0.0618316
chr1	94528097	94529263	1167	0.0915795
chr1	94544050	94545240	1191	0.0575663
chr1	94558271	94559317	1047	0.0605109
chr1	94564267	94564866	600	0.0733146
chr1	94571121	94572616	1496	0.053144
chr1	94576056	94576941	886	0.0589227
chr1	94725090	94725224	135	0.0693316
chr1	94725549	94726258	710	0.0730777
chr1	94774134	94775300	1167	0.0653264
chr1	94789188	94789634	447	0.0560505
chr1	94854166	94854301	136	0.0694701
chr1	94897326	94897703	378	0.0727407
chr1	94899001	94899010	10	0.0648063
chr1	94899393	94899564	172	0.0630999
chr1	94905978	94906325	348	0.128131
chr1	94968335	94968946	612	0.054879
chr1	95094870	95095718	849	0.0545856
chr1	95212646	95212849	204	0.0848403
chr1	95219407	95220838	1432	0.065795
chr1	95306675	95307263	589	0.0477725
chr1	95309526	95310330	805	0.0657502
chr1	95341655	95342043	389	0.0507082
chr1	95351188	95353146	1959	0.0607758
chr1	95360280	95360379	100	0.0647084
chr1	95417101	95417466	366	0.100272
chr1	95452318	95452739	422	0.117873
chr1	95453312	95453727	416	0.141357
chr1	95455567	95455823	257	0.0739367
chr1	95465245	95465817	573	0.0572153
chr1	95492147	95492794	648	0.067022
chr1	95493951	95494122	172	0.0874766
chr1	95507923	95507937	15	0.114204
chr1	95531558	95532403	846	0.0712063
chr1	95533253	95533576	324	0.0942249
chr1	95585610	95586944	1335	0.0781039
chr1	96608219	96608340	122	0.0762319
[truncated: 35,161 more rows]

## Sheet: Table S5
Supplemental Table S5. List of identified 5hmC regions in normal lung
chr	start	end	width	5hmC level
chr1	839106	839668	563	0.0611803
chr1	847457	848523	1067	0.057139
chr1	853769	855298	1530	0.0816716
chr1	856975	858615	1641	0.113594
chr1	871388	872196	809	0.0733379
chr1	873726	874762	1037	0.0726315
chr1	878877	879608	732	0.0907022
chr1	880158	881446	1289	0.0670833
chr1	896749	897308	560	0.0814148
chr1	897767	898544	778	0.0552042
chr1	900929	901643	715	0.0971998
chr1	913599	913814	216	0.079715
chr1	916477	916751	275	0.0559472
chr1	932532	932971	440	0.0683437
chr1	938043	940438	2396	0.0770552
chr1	961927	963845	1919	0.071322
chr1	971290	972021	732	0.0661215
chr1	972751	975315	2565	0.0644281
chr1	989460	990213	754	0.0563923
chr1	996197	996318	122	0.0620114
chr1	1005211	1005991	781	0.0715341
chr1	1032774	1033082	309	0.0514303
chr1	1055754	1056005	252	0.0573485
chr1	1059358	1060069	712	0.0650448
chr1	1064794	1065251	458	0.0649774
chr1	1065667	1065914	248	0.0613305
chr1	1090548	1092646	2099	0.0690787
chr1	1094024	1094941	918	0.089232
chr1	1098558	1099073	516	0.0654608
chr1	1101302	1101807	506	0.0695476
chr1	1134818	1136179	1362	0.101644
chr1	1140494	1141491	998	0.0682056
chr1	1151541	1152483	943	0.0692506
chr1	1164064	1164564	501	0.0562665
chr1	1186012	1187107	1096	0.0811449
chr1	1195448	1195965	518	0.100827
chr1	1200306	1200858	553	0.0877052
chr1	1205095	1206921	1827	0.0594711
chr1	1234015	1234273	259	0.057876
chr1	1235452	1236181	730	0.0553921
chr1	1237136	1238875	1740	0.0721938
chr1	1241535	1242447	913	0.119509
chr1	1244928	1246318	1391	0.0801147
chr1	1253786	1253939	154	0.0944248
chr1	1264578	1264925	348	0.0615399
chr1	1268194	1271172	2979	0.0741472
chr1	1274204	1274948	745	0.0569081
chr1	1275468	1275968	501	0.0507792
chr1	1278156	1278592	437	0.0562506
chr1	1288471	1289599	1129	0.073682
chr1	1311479	1312144	666	0.0977569
chr1	1330361	1331322	962	0.0764568
chr1	1335806	1336719	914	0.0886586
chr1	1361145	1362508	1364	0.0678731
chr1	1366990	1368051	1062	0.0841089
chr1	1373313	1374139	827	0.071087
chr1	1384930	1385123	194	0.0700025
chr1	1393911	1394094	184	0.0577927
chr1	1476551	1477698	1148	0.0639158
chr1	1502407	1503041	635	0.0943042
chr1	1505000	1505201	202	0.118525
chr1	1505536	1506273	738	0.0715573
chr1	1507014	1507545	532	0.112245
chr1	1584223	1584496	274	0.0625114
chr1	1613022	1613162	141	0.0592042
chr1	1613541	1614085	545	0.0598914
chr1	1616542	1617309	768	0.0703039
chr1	1618489	1618626	138	0.0586786
chr1	1625403	1626018	616	0.0903682
chr1	1630954	1631118	165	0.162412
chr1	1660717	1660800	84	0.115342
chr1	1673537	1673652	116	0.0616806
chr1	1690792	1691555	764	0.0706364
chr1	1705818	1706284	467	0.0579588
chr1	1712528	1713676	1149	0.113668
chr1	1718270	1719196	927	0.059682
chr1	1722633	1723679	1047	0.059988
chr1	1724668	1726932	2265	0.0735649
chr1	1727663	1728224	562	0.0554808
chr1	1739060	1740113	1054	0.0982031
chr1	1747346	1747874	529	0.0602126
chr1	1749173	1749888	716	0.0597379
chr1	1763767	1765624	1858	0.102478
chr1	1766386	1766685	300	0.0820602
chr1	1767271	1768285	1015	0.0950027
chr1	1771977	1773597	1621	0.179962
chr1	1774002	1774504	503	0.120486
chr1	1776698	1777006	309	0.108903
chr1	1777397	1777727	331	0.129388
chr1	1778765	1779832	1068	0.111234
chr1	1780948	1781037	90	0.108567
chr1	1783583	1784886	1304	0.0822538
chr1	1786071	1786213	143	0.0840227
chr1	1793361	1794548	1188	0.160221
chr1	1801924	1802550	627	0.125301
chr1	1802965	1804529	1565	0.133595
chr1	1806268	1807445	1178	0.0848498
chr1	1809509	1809690	182	0.132107
chr1	1810023	1810501	479	0.112866
chr1	1813505	1813995	491	0.080608
chr1	1814354	1814625	272	0.184742
chr1	1815795	1816144	350	0.139858
chr1	1848855	1850162	1308	0.0783312
chr1	1851372	1853030	1659	0.0979759
chr1	1853588	1854203	616	0.0553668
chr1	1856073	1856666	594	0.0752332
chr1	1900969	1901277	309	0.0672181
chr1	1930310	1930852	543	0.0677574
chr1	1962486	1962843	358	0.0549696
chr1	1986847	1987530	684	0.0746655
chr1	1990842	1990886	45	0.0490821
chr1	2017364	2017976	613	0.0603266
chr1	2025796	2025836	41	0.0496408
chr1	2048351	2049269	919	0.0585561
chr1	2080906	2081315	410	0.0670134
chr1	2086840	2088082	1243	0.0699494
chr1	2117245	2118576	1332	0.0590637
chr1	2122423	2123581	1159	0.0822706
chr1	2129671	2130694	1024	0.0895083
chr1	2134474	2135447	974	0.0640234
chr1	2137180	2139064	1885	0.0872917
chr1	2139544	2140212	669	0.058872
chr1	2140884	2142698	1815	0.0676872
chr1	2157683	2158295	613	0.110101
chr1	2164006	2165459	1454	0.085424
chr1	2166802	2167707	906	0.124027
chr1	2168095	2169612	1518	0.0832297
chr1	2169942	2172759	2818	0.101405
chr1	2173123	2175329	2207	0.0925149
chr1	2177555	2177915	361	0.0929402
chr1	2179243	2187457	8215	0.0934661
chr1	2187762	2188550	789	0.098908
chr1	2190265	2191829	1565	0.117303
chr1	2193116	2193242	127	0.171353
chr1	2194053	2194363	311	0.0709001
chr1	2194955	2195469	515	0.0755579
chr1	2197455	2198432	978	0.0887172
chr1	2199281	2201060	1780	0.0711841
chr1	2204215	2206201	1987	0.0910122
chr1	2206609	2208721	2113	0.100448
chr1	2209037	2210270	1234	0.108659
chr1	2214240	2216677	2438	0.0878988
chr1	2217602	2219449	1848	0.0861936
chr1	2222764	2226558	3795	0.0795077
chr1	2226973	2230347	3375	0.0916848
chr1	2232958	2234314	1357	0.0850378
chr1	2239389	2239905	517	0.078244
chr1	2241435	2242436	1002	0.0722851
chr1	2242867	2245127	2261	0.0866297
chr1	2246927	2247881	955	0.117324
chr1	2251642	2252422	781	0.0689948
chr1	2254477	2255333	857	0.0626384
chr1	2265405	2265643	239	0.0549238
chr1	2290910	2292737	1828	0.0719574
chr1	2311446	2311673	228	0.0508763
chr1	2321920	2322150	231	0.0661235
chr1	2324987	2327730	2744	0.068462
chr1	2334249	2335339	1091	0.0684695
chr1	2336305	2337277	973	0.0737196
chr1	2342951	2342995	45	0.128623
chr1	2349235	2350123	889	0.0651925
chr1	2356838	2357253	416	0.0542761
chr1	2397179	2397380	202	0.0524374
chr1	2405542	2407154	1613	0.0575533
chr1	2430643	2431422	780	0.0859492
chr1	2437916	2439051	1136	0.083764
chr1	2455927	2456609	683	0.0711434
chr1	2458347	2458649	303	0.0671104
chr1	2467269	2467953	685	0.0643954
chr1	2472715	2474539	1825	0.0749506
chr1	2485897	2486868	972	0.0744623
chr1	2488841	2489787	947	0.100534
chr1	2492755	2494021	1267	0.0555815
chr1	2507061	2508098	1038	0.0883899
chr1	2512866	2513388	523	0.0611131
chr1	2515352	2515774	423	0.0623693
chr1	2520172	2521283	1112	0.0697399
chr1	2524517	2526336	1820	0.070899
chr1	2548241	2548550	310	0.0582425
chr1	2571875	2572242	368	0.0565072
chr1	2716235	2716393	159	0.0594356
chr1	2720696	2721493	798	0.0607734
chr1	2731370	2731769	400	0.0662873
chr1	2767081	2767974	894	0.0697103
chr1	2777889	2778595	707	0.0613412
chr1	2803590	2804204	615	0.0513547
chr1	2851239	2851540	302	0.0547647
chr1	2876259	2876807	549	0.0620851
chr1	2881289	2881616	328	0.062325
chr1	2974298	2974431	134	0.0709994
chr1	2974822	2974964	143	0.0576073
chr1	2977453	2978383	931	0.0888753
chr1	3006627	3006865	239	0.0520355
chr1	3009968	3010155	188	0.0514713
chr1	3010264	3011342	1079	0.0812323
chr1	3012515	3013051	537	0.0567805
chr1	3013802	3014707	906	0.067851
chr1	3016331	3017484	1154	0.0668354
chr1	3018508	3019660	1153	0.0700984
chr1	3048506	3050043	1538	0.0730995
chr1	3063792	3066518	2727	0.0699531
chr1	3071723	3072484	762	0.0792315
chr1	3076548	3077633	1086	0.0585861
chr1	3130752	3130988	237	0.0628141
chr1	3153293	3154900	1608	0.0632586
chr1	3191392	3191908	517	0.0667788
chr1	3211944	3213488	1545	0.0818954
chr1	3233081	3233775	695	0.0749135
chr1	3264451	3265013	563	0.056145
chr1	3286559	3286898	340	0.0542048
chr1	3291849	3293410	1562	0.0722562
chr1	3301694	3302199	506	0.0609475
chr1	3304959	3306349	1391	0.0825014
chr1	3309391	3309890	500	0.0705063
chr1	3326612	3327032	421	0.0947688
chr1	3336345	3337426	1082	0.062695
chr1	3383630	3383871	242	0.0563327
chr1	3394801	3396162	1362	0.0635035
chr1	3408505	3409607	1103	0.0809355
chr1	3411157	3413340	2184	0.0623669
chr1	3418778	3421061	2284	0.0652099
chr1	3426433	3426841	409	0.0575352
chr1	3434914	3436035	1122	0.0623301
chr1	3439039	3439497	459	0.0517164
chr1	3448489	3451187	2699	0.092585
chr1	3451621	3453344	1724	0.0582791
chr1	3465548	3466969	1422	0.0646678
chr1	3481938	3482588	651	0.0680723
chr1	3487602	3488329	728	0.0641198
chr1	3502632	3503081	450	0.0731228
chr1	3505172	3506029	858	0.0755588
chr1	3508724	3511415	2692	0.0801868
chr1	3512697	3513006	310	0.067367
chr1	3515607	3517760	2154	0.088426
chr1	3520989	3521431	443	0.0546934
chr1	3521792	3522540	749	0.0546434
chr1	3528802	3530111	1310	0.104827
chr1	3534936	3535549	614	0.0821825
chr1	3546069	3547232	1164	0.0676883
chr1	3592183	3592760	578	0.072511
chr1	3593087	3594414	1328	0.120044
chr1	3601809	3602022	214	0.0510013
chr1	3634581	3635016	436	0.0751696
chr1	3641022	3641167	146	0.0551063
chr1	3650226	3650954	729	0.064716
chr1	3660553	3660755	203	0.0561829
chr1	3697579	3698045	467	0.0547132
chr1	3711662	3711862	201	0.0934963
chr1	3719762	3720034	273	0.0672982
chr1	3736307	3736483	177	0.0520563
chr1	3755939	3756636	698	0.0617998
chr1	3762002	3762645	644	0.0680932
chr1	3767716	3768978	1263	0.057481
chr1	3775236	3776252	1017	0.0689175
chr1	3779831	3780339	509	0.0711309
chr1	3810575	3811472	898	0.0908914
chr1	3815987	3816032	46	0.12797
chr1	3839442	3840488	1047	0.0725014
chr1	4120085	4120775	691	0.0663591
chr1	4131044	4132250	1207	0.0753182
chr1	4132600	4133024	425	0.0640635
chr1	4177193	4177769	577	0.0569093
chr1	4192202	4192487	286	0.0567737
chr1	4326162	4326416	255	0.106117
chr1	4327050	4327580	531	0.0686256
chr1	4400085	4400973	889	0.0650089
chr1	4401449	4401576	128	0.0538531
chr1	4447355	4448387	1033	0.0710851
chr1	4469003	4469362	360	0.0552617
chr1	4506682	4507054	373	0.0524888
chr1	4573466	4574189	724	0.0778466
chr1	4784676	4785678	1003	0.0634403
chr1	4817066	4817508	443	0.0646672
chr1	4840270	4840840	571	0.0549899
chr1	4856418	4857573	1156	0.05542
chr1	4932614	4932786	173	0.057811
chr1	4933343	4934383	1041	0.0694809
chr1	5286702	5286807	106	0.0608712
chr1	5371322	5372135	814	0.063111
chr1	5440984	5441097	114	0.0699562
chr1	5544977	5545340	364	0.050548
chr1	5567972	5568588	617	0.0639483
chr1	5591461	5591638	178	0.0565747
chr1	5591968	5592421	454	0.0609955
chr1	5592850	5592985	136	0.0577414
chr1	5658050	5659205	1156	0.064075
chr1	5673887	5674612	726	0.0680766
chr1	5717470	5718981	1512	0.0534548
chr1	5806904	5807296	393	0.0640507
chr1	5816658	5816717	60	0.0492461
chr1	5841507	5841781	275	0.0637982
chr1	5860670	5861360	691	0.0541374
chr1	5867363	5868577	1215	0.0591593
chr1	5941838	5942113	276	0.055497
chr1	5993916	5995700	1785	0.0630847
chr1	6031219	6031238	20	0.0532426
chr1	6047053	6048355	1303	0.0823168
chr1	6056637	6057942	1306	0.0570843
chr1	6086379	6086600	222	0.0596489
chr1	6116553	6117257	705	0.0651222
chr1	6119566	6120603	1038	0.0763323
chr1	6121099	6122147	1049	0.0707314
chr1	6122451	6123417	967	0.0872318
chr1	6140153	6141941	1789	0.061716
chr1	6147996	6148150	155	0.0537142
chr1	6160453	6162744	2292	0.0716433
chr1	6222502	6223835	1334	0.0739957
chr1	6244181	6244835	655	0.0826668
chr1	6247822	6248021	200	0.0565481
chr1	6269829	6270235	407	0.073885
chr1	6280100	6281457	1358	0.0774754
chr1	6294699	6295139	441	0.0696929
chr1	6327695	6328285	591	0.059338
chr1	6333156	6333681	526	0.0586292
chr1	6341551	6342237	687	0.0649929
chr1	6355155	6355702	548	0.0528574
chr1	6390715	6390901	187	0.0573894
chr1	6403381	6404218	838	0.0714237
chr1	6407177	6407421	245	0.0644882
chr1	6414978	6416312	1335	0.0682516
chr1	6416996	6419112	2117	0.103606
chr1	6419624	6421414	1791	0.0695786
chr1	6434210	6434470	261	0.0788567
chr1	6454440	6455339	900	0.130952
chr1	6464068	6464315	248	0.0780652
chr1	6468998	6469194	197	0.0741605
chr1	6521981	6522120	140	0.0503143
chr1	6523912	6525171	1260	0.073931
chr1	6542078	6542331	254	0.0623278
chr1	6551301	6553746	2446	0.107132
chr1	6554877	6556795	1919	0.0744475
chr1	6559820	6561702	1883	0.0756312
chr1	6562019	6562968	950	0.0708063
chr1	6572876	6573182	307	0.0490522
chr1	6578693	6578966	274	0.06381
chr1	6607235	6608563	1329	0.0811629
chr1	6639131	6639570	440	0.0800334
chr1	6640858	6641580	723	0.100049
chr1	6646637	6648282	1646	0.0825647
chr1	6664237	6665652	1416	0.0955645
chr1	6676673	6676977	305	0.100858
chr1	6682022	6682822	801	0.0710142
chr1	6683145	6684360	1216	0.0659638
chr1	6686133	6687152	1020	0.079886
chr1	6696122	6696475	354	0.0505328
chr1	6726369	6727005	637	0.0567603
chr1	6767775	6768245	471	0.0541934
chr1	6857030	6857416	387	0.0701558
chr1	6857726	6857738	13	0.0764645
chr1	6874414	6874747	334	0.0655523
chr1	6877328	6878608	1281	0.102007
chr1	6916923	6918100	1178	0.0806411
chr1	6941387	6941765	379	0.0671123
chr1	6964701	6965207	507	0.0616379
chr1	6982618	6983361	744	0.0521952
chr1	7032369	7033286	918	0.0599105
chr1	7222748	7223057	310	0.0561993
chr1	7409802	7410646	845	0.0675996
chr1	7443123	7444989	1867	0.062521
chr1	7471267	7471770	504	0.0809488
chr1	7498652	7499238	587	0.0558668
chr1	7513872	7514058	187	0.0670194
chr1	7532917	7534159	1243	0.0719204
chr1	7546600	7547269	670	0.055802
chr1	7547606	7548562	957	0.0785119
chr1	7570468	7571308	841	0.0701225
chr1	7571656	7572524	869	0.0601338
chr1	7597262	7598538	1277	0.0610314
chr1	7612135	7612386	252	0.0683278
chr1	7621428	7622042	615	0.0633857
chr1	7640794	7642055	1262	0.0622617
chr1	7643715	7644425	711	0.0512302
chr1	7705228	7706395	1168	0.0875123
chr1	7707035	7707249	215	0.101014
chr1	7712178	7712997	820	0.065909
chr1	7841688	7843075	1388	0.101107
chr1	7855910	7856058	149	0.0528722
chr1	7859975	7860297	323	0.0511484
chr1	7886603	7888280	1678	0.0832405
chr1	7954523	7955088	566	0.0786308
chr1	7978146	7979499	1354	0.0639618
chr1	8011420	8012154	735	0.0976069
chr1	8024168	8026121	1954	0.0882605
chr1	8035193	8035551	359	0.0782464
chr1	8064789	8065858	1070	0.0823806
chr1	8068667	8070448	1782	0.0691896
chr1	8072453	8072927	475	0.090451
chr1	8073301	8074467	1167	0.0677352
chr1	8122955	8123398	444	0.0811084
chr1	8149548	8149997	450	0.104273
chr1	8150521	8150850	330	0.123563
chr1	8151232	8151711	480	0.08814
chr1	8165033	8165372	340	0.0665912
chr1	8174120	8174981	862	0.0702937
chr1	8179413	8179569	157	0.0996677
chr1	8179877	8180703	827	0.13061
chr1	8182568	8182773	206	0.124476
chr1	8183207	8183689	483	0.0906593
chr1	8192157	8192393	237	0.0592052
chr1	8216744	8217277	534	0.0537549
chr1	8234390	8235082	693	0.0893293
chr1	8235922	8235977	56	0.0534975
chr1	8249976	8250420	445	0.061534
chr1	8257768	8258948	1181	0.108709
chr1	8259284	8259571	288	0.0802596
chr1	8266934	8267534	601	0.0637315
chr1	8270350	8271918	1569	0.0732117
chr1	8272753	8273035	283	0.0937255
chr1	8273336	8274462	1127	0.117353
chr1	8274844	8275974	1131	0.117256
chr1	8277901	8279181	1281	0.0961527
chr1	8296536	8296910	375	0.0794651
chr1	8309765	8310955	1191	0.104514
chr1	8317449	8318619	1171	0.0808783
chr1	8341914	8344416	2503	0.0913539
chr1	8356120	8356497	378	0.0624232
chr1	8409053	8409264	212	0.0634159
chr1	8410650	8414370	3721	0.0715383
chr1	8415129	8415720	592	0.074317
chr1	8417399	8417835	437	0.0603645
chr1	8418996	8419897	902	0.0661175
chr1	8420774	8421441	668	0.0617908
chr1	8424823	8425334	512	0.0812907
chr1	8431607	8433444	1838	0.094169
chr1	8436181	8436918	738	0.111385
chr1	8439108	8441380	2273	0.124511
chr1	8442339	8443648	1310	0.131721
chr1	8449393	8450525	1133	0.0867724
chr1	8450904	8451370	467	0.118093
chr1	8452692	8453021	330	0.164113
chr1	8454440	8454818	379	0.0826136
chr1	8455252	8455301	50	0.0535899
chr1	8456380	8457417	1038	0.0646032
chr1	8462213	8462966	754	0.092508
chr1	8469254	8470895	1642	0.118098
chr1	8477536	8478577	1042	0.134482
chr1	8478999	8479489	491	0.111353
chr1	8479806	8480194	389	0.0726813
chr1	8485011	8486492	1482	0.0769229
chr1	8490628	8491313	686	0.120312
chr1	8494778	8495634	857	0.100046
chr1	8496073	8496479	407	0.1126
chr1	8501211	8501476	266	0.106883
chr1	8502034	8502767	734	0.0772485
chr1	8504555	8504872	318	0.0661617
chr1	8507882	8508757	876	0.0780687
chr1	8511530	8512180	651	0.0975101
chr1	8512777	8513596	820	0.0867277
chr1	8514340	8514843	504	0.109736
chr1	8515161	8515552	392	0.128301
chr1	8524896	8526615	1720	0.119506
chr1	8532380	8532505	126	0.0963265
chr1	8532839	8534202	1364	0.0716416
chr1	8552643	8553131	489	0.086016
chr1	8554402	8555213	812	0.102451
chr1	8558992	8559048	57	0.141121
chr1	8559382	8559525	144	0.139893
chr1	8569130	8569768	639	0.0655121
chr1	8575155	8575477	323	0.088833
chr1	8576132	8576232	101	0.0719758
chr1	8582927	8583105	179	0.122554
chr1	8664247	8664559	313	0.106935
chr1	8704413	8704452	40	0.124649
chr1	8723687	8724623	937	0.100782
chr1	8741157	8741381	225	0.0672187
chr1	8765247	8765913	667	0.173101
chr1	8767347	8768798	1452	0.111382
chr1	8769258	8769511	254	0.0996274
chr1	8770052	8770909	858	0.0939619
chr1	8820365	8820480	116	0.0987758
chr1	8825113	8825738	626	0.0970215
chr1	8843629	8844259	631	0.0631372
chr1	8863253	8863746	494	0.0935898
chr1	8867222	8867652	431	0.0663723
chr1	8884115	8884467	353	0.0549771
chr1	8885318	8886654	1337	0.0690636
chr1	8891211	8891614	404	0.170324
chr1	8892924	8893152	229	0.0593013
chr1	8904486	8904976	491	0.0552132
chr1	8907891	8909738	1848	0.0839023
chr1	8919275	8919797	523	0.0660587
chr1	8930655	8931337	683	0.084782
chr1	8931674	8932473	800	0.127282
chr1	8932917	8933352	436	0.0933417
chr1	8934685	8935061	377	0.128627
chr1	8962499	8963577	1079	0.0831082
chr1	8963950	8964902	953	0.157158
chr1	8965343	8966032	690	0.156965
chr1	8997834	8998310	477	0.102767
chr1	9022822	9023606	785	0.0681425
chr1	9088783	9089020	238	0.0681654
chr1	9122879	9123462	584	0.157911
chr1	9144420	9145274	855	0.0986016
chr1	9179387	9180065	679	0.0819323
chr1	9213884	9214436	553	0.0865062
chr1	9216127	9216448	322	0.0810641
chr1	9216911	9217938	1028	0.0602936
chr1	9228591	9229643	1053	0.0773044
chr1	9233140	9233589	450	0.0760976
chr1	9236790	9237358	569	0.0567804
chr1	9249546	9249712	167	0.0530412
chr1	9252607	9253654	1048	0.0713674
chr1	9260479	9261269	791	0.0976755
chr1	9284879	9286138	1260	0.0647793
chr1	9295890	9295973	84	0.121769
chr1	9296340	9297208	869	0.103786
chr1	9297571	9298524	954	0.1074
chr1	9301612	9302182	571	0.123323
chr1	9317487	9319081	1595	0.0668473
chr1	9320893	9321614	722	0.0753472
chr1	9323091	9323514	424	0.0560412
chr1	9326379	9326823	445	0.0919694
chr1	9333295	9334582	1288	0.070699
chr1	9338669	9340349	1681	0.10654
chr1	9350198	9351039	842	0.167818
chr1	9359936	9363073	3138	0.073997
chr1	9365010	9366091	1082	0.0578544
chr1	9367506	9369639	2134	0.0713649
chr1	9370056	9370473	418	0.0685391
chr1	9372039	9372776	738	0.0640904
chr1	9375726	9376629	904	0.0877578
chr1	9381691	9382624	934	0.0803139
chr1	9388320	9391302	2983	0.0773786
chr1	9391669	9393203	1535	0.102794
chr1	9397504	9399924	2421	0.0747353
chr1	9412655	9415387	2733	0.0713311
chr1	9417530	9417807	278	0.0491605
chr1	9422221	9423691	1471	0.100895
chr1	9425622	9426657	1036	0.0680755
chr1	9432571	9434253	1683	0.0660142
chr1	9435607	9437754	2148	0.0849754
chr1	9454125	9454719	595	0.0556978
chr1	9466501	9466700	200	0.0587563
chr1	9499126	9500604	1479	0.0746924
chr1	9507437	9508608	1172	0.0649542
chr1	9623271	9623281	11	0.110597
chr1	9637590	9638345	756	0.0540325
chr1	9652616	9655326	2711	0.0649234
chr1	9659277	9659559	283	0.0592733
chr1	9667117	9667769	653	0.0636266
chr1	9675845	9676497	653	0.0817729
chr1	9690050	9691434	1385	0.0949881
chr1	9692349	9692878	530	0.0635977
chr1	9700797	9702104	1308	0.0627556
chr1	9702450	9702826	377	0.0640796
chr1	9736379	9737840	1462	0.106629
chr1	9741495	9741951	457	0.0753347
chr1	9743793	9744332	540	0.0760025
chr1	9754586	9755651	1066	0.0715016
chr1	9757404	9757816	413	0.0589994
chr1	9758861	9759609	749	0.0586315
chr1	9762868	9764175	1308	0.084887
chr1	9764703	9765427	725	0.0755756
chr1	9775302	9775581	280	0.0622906
chr1	9818651	9819215	565	0.086196
chr1	9820344	9821084	741	0.0807725
chr1	9821538	9822241	704	0.0897908
chr1	9840275	9841065	791	0.0691034
chr1	9846886	9849378	2493	0.0701023
chr1	9858413	9858972	560	0.0939048
chr1	9863172	9863598	427	0.094871
chr1	9866359	9867763	1405	0.0676112
chr1	9869122	9869921	800	0.0741689
chr1	9871643	9872317	675	0.0998841
chr1	9874384	9874832	449	0.0880377
chr1	9887620	9888379	760	0.113953
chr1	9901392	9902662	1271	0.0741118
chr1	9904386	9905223	838	0.051079
chr1	9909787	9911364	1578	0.069646
chr1	9911718	9913624	1907	0.0784774
chr1	9920419	9921712	1294	0.0527202
chr1	9947454	9950470	3017	0.0648026
chr1	9952637	9952869	233	0.0746531
chr1	9954157	9954777	621	0.0801439
chr1	9960353	9960532	180	0.0851619
chr1	9961752	9961862	111	0.0601001
chr1	10006488	10006802	315	0.0868622
chr1	10014506	10014659	154	0.0690851
chr1	10024244	10024598	355	0.0908693
chr1	10025750	10026423	674	0.0941108
chr1	10033840	10034883	1044	0.0523271
chr1	10044356	10044838	483	0.110199
chr1	10045585	10045998	414	0.0636345
chr1	10049962	10050595	634	0.0695876
chr1	10058745	10058760	16	0.0584352
chr1	10092241	10092299	59	0.126041
chr1	10095344	10095393	50	0.0632256
chr1	10101644	10101786	143	0.0700169
chr1	10105753	10107275	1523	0.097898
chr1	10113134	10113840	707	0.0611411
chr1	10118719	10120545	1827	0.0800075
chr1	10135938	10136144	207	0.0937611
chr1	10144002	10145454	1453	0.0842723
chr1	10148720	10149529	810	0.103053
chr1	10184192	10184537	346	0.0615397
chr1	10215407	10215818	412	0.0718942
chr1	10255264	10256466	1203	0.0721576
chr1	10271839	10272185	347	0.146159
chr1	10281447	10281494	48	0.115711
chr1	10310367	10310553	187	0.0661769
chr1	10349210	10349669	460	0.108859
chr1	10350178	10351339	1162	0.0790796
chr1	10382913	10384047	1135	0.0694155
chr1	10438223	10439342	1120	0.0917942
chr1	10447621	10447997	377	0.0772296
chr1	10474129	10475433	1305	0.0866955
chr1	10480028	10480871	844	0.0543769
chr1	10519202	10519883	682	0.079889
chr1	10523108	10524493	1386	0.0585509
chr1	10530504	10531703	1200	0.103608
chr1	10534490	10534539	50	0.0676629
chr1	10537406	10538225	820	0.0869976
chr1	10567058	10567799	742	0.107388
chr1	10611449	10611887	439	0.0723519
chr1	10622050	10622460	411	0.09206
chr1	10636970	10637190	221	0.0637152
chr1	10637850	10638201	352	0.0637524
chr1	10651801	10653427	1627	0.0752226
chr1	10653868	10654031	164	0.0733311
chr1	10654361	10656351	1991	0.0854729
chr1	10671032	10671434	403	0.0864828
chr1	10687098	10687905	808	0.0726674
chr1	10688348	10688766	419	0.0698163
chr1	10691247	10692114	868	0.070464
chr1	10692876	10695101	2226	0.0879295
chr1	10695916	10696620	705	0.0942825
chr1	10697316	10698524	1209	0.113326
chr1	10699480	10699572	93	0.0727064
chr1	10700647	10702316	1670	0.0673933
chr1	10704340	10704757	418	0.0545872
chr1	10705961	10707104	1144	0.0733108
chr1	10712302	10712543	242	0.0694477
chr1	10712967	10713644	678	0.0632313
chr1	10719779	10721387	1609	0.0749662
chr1	10726630	10727660	1031	0.07841
chr1	10734105	10734515	411	0.0693189
chr1	10746398	10747290	893	0.0693468
chr1	10765762	10765914	153	0.048879
chr1	10776361	10777409	1049	0.12567
chr1	10779311	10780203	893	0.0688104
chr1	10783547	10785480	1934	0.121871
chr1	10785848	10786581	734	0.0823024
chr1	10793972	10797227	3256	0.0959542
chr1	10808594	10809272	679	0.0606731
chr1	10819937	10821973	2037	0.0684243
chr1	10827746	10828262	517	0.0666421
chr1	10832935	10836110	3176	0.0694395
chr1	10838027	10838237	211	0.0654453
chr1	10838580	10839068	489	0.100654
chr1	10840645	10840981	337	0.0581092
chr1	10841976	10842586	611	0.0522871
chr1	10844172	10845027	856	0.0715336
chr1	10845397	10846770	1374	0.0851719
chr1	10847183	10848328	1146	0.0585697
chr1	10882786	10883710	925	0.0600439
chr1	10885897	10886303	407	0.0591199
chr1	10890031	10890224	194	0.0550764
chr1	10915993	10917748	1756	0.086574
chr1	10974128	10974751	624	0.0559507
chr1	10985709	10986024	316	0.065162
chr1	11006005	11006841	837	0.0744316
chr1	11023537	11024608	1072	0.0765502
chr1	11026239	11026563	325	0.0580102
chr1	11039379	11040099	721	0.0809078
chr1	11074980	11075265	286	0.0589626
chr1	11088670	11089406	737	0.115576
chr1	11105476	11106576	1101	0.106027
chr1	11111160	11111637	478	0.0727172
chr1	11124100	11124435	336	0.0672499
chr1	11124904	11125247	344	0.0752085
chr1	11127975	11128527	553	0.0528908
chr1	11207385	11207707	323	0.065041
chr1	11233342	11235755	2414	0.0678619
chr1	11236204	11237078	875	0.0601714
chr1	11241438	11242261	824	0.0796337
chr1	11255039	11255782	744	0.0529544
chr1	11256126	11256649	524	0.0576198
chr1	11296262	11296514	253	0.0659996
chr1	11335706	11336263	558	0.118312
chr1	11354080	11354842	763	0.0666044
chr1	11389800	11390509	710	0.0589332
chr1	11399345	11399912	568	0.0728942
chr1	11447230	11447703	474	0.0572551
chr1	11474180	11474364	185	0.0711076
chr1	11477695	11477798	104	0.0631171
chr1	11541327	11541720	394	0.0689004
chr1	11581198	11581258	61	0.0498913
chr1	11599017	11599046	30	0.050571
chr1	11626900	11627690	791	0.0662521
chr1	11632735	11633068	334	0.0525724
chr1	11635660	11635920	261	0.0557641
chr1	11669924	11670375	452	0.0702343
chr1	11680059	11680758	700	0.0577563
chr1	11696848	11697575	728	0.0749294
chr1	11713756	11714218	463	0.0959564
chr1	11715922	11716395	474	0.0552603
chr1	11731478	11733794	2317	0.064963
chr1	11740348	11740520	173	0.123578
chr1	11766739	11769614	2876	0.0744579
chr1	11776328	11776484	157	0.0534485
chr1	11789049	11791036	1988	0.0763168
chr1	11799744	11802362	2619	0.0992348
chr1	11806254	11806537	284	0.0596965
chr1	11808789	11809727	939	0.0671387
chr1	11842165	11842476	312	0.057481
chr1	11844266	11844729	464	0.100881
chr1	11847486	11850927	3442	0.0929051
chr1	11851618	11853173	1556	0.0713868
chr1	11860929	11861663	735	0.0953151
chr1	11868370	11868450	81	0.0929375
chr1	11871718	11873286	1569	0.0703549
chr1	11873727	11873747	21	0.0820265
chr1	11898486	11899039	554	0.06328
chr1	11901395	11902098	704	0.0635558
chr1	11908199	11908817	619	0.0715403
chr1	11935106	11935728	623	0.0736302
chr1	11983461	11984438	978	0.117917
chr1	11989153	11990899	1747	0.0984939
chr1	11994216	11994263	48	0.0841259
chr1	11995959	11996165	207	0.0570336
chr1	12008410	12009394	985	0.0750887
chr1	12017223	12017735	513	0.0537881
chr1	12031504	12032956	1453	0.0569721
chr1	12037373	12038728	1356	0.0808098
chr1	12090542	12091953	1412	0.0811466
chr1	12093158	12093266	109	0.0575948
chr1	12094026	12094084	59	0.0808688
chr1	12094411	12095141	731	0.0724022
chr1	12106843	12107100	258	0.0569192
chr1	12111851	12113529	1679	0.0913801
chr1	12185186	12186422	1237	0.0825737
chr1	12193985	12195199	1215	0.0815549
chr1	12198276	12198552	277	0.050504
chr1	12199094	12199681	588	0.0583648
chr1	12201342	12204507	3166	0.0733427
chr1	12206650	12208424	1775	0.0677889
chr1	12211190	12214053	2864	0.0852854
chr1	12221234	12224834	3601	0.0875609
chr1	12225149	12225965	817	0.0941015
chr1	12228210	12229740	1531	0.0924896
chr1	12231033	12232574	1542	0.148867
chr1	12232964	12234071	1108	0.0802895
chr1	12236894	12237917	1024	0.0856976
chr1	12239028	12241967	2940	0.0972595
chr1	12242305	12242681	377	0.112496
chr1	12243104	12243336	233	0.0979061
chr1	12245935	12247227	1293	0.0614049
chr1	12252819	12253162	344	0.0695909
chr1	12256419	12257920	1502	0.0867667
chr1	12259001	12260676	1676	0.0713347
chr1	12267639	12270544	2906	0.0875639
chr1	12293342	12293395	54	0.0707998
chr1	12293826	12294092	267	0.0715405
chr1	12295066	12295966	901	0.0934765
chr1	12301237	12302297	1061	0.0689137
chr1	12327484	12328117	634	0.0525099
chr1	12335988	12336923	936	0.0777279
chr1	12346547	12346801	255	0.0561023
chr1	12368513	12369105	593	0.0575654
chr1	12371602	12371850	249	0.0599747
chr1	12377504	12377707	204	0.0588932
chr1	12400642	12401102	461	0.121519
chr1	12401556	12401967	412	0.0929393
chr1	12402784	12403044	261	0.0835133
chr1	12435640	12435873	234	0.0741186
chr1	12444591	12445381	791	0.0944044
chr1	12446886	12447240	355	0.0976509
chr1	12465010	12465665	656	0.109039
chr1	12471815	12472164	350	0.0642291
chr1	12488225	12489098	874	0.0698946
chr1	12489599	12489721	123	0.0634619
chr1	12490361	12490879	519	0.0815104
chr1	12498521	12499651	1131	0.158552
chr1	12500167	12500659	493	0.07478
chr1	12507513	12508137	625	0.0875199
chr1	12508739	12509129	391	0.0620962
chr1	12517748	12519371	1624	0.0828138
chr1	12524688	12525469	782	0.0980891
chr1	12532959	12534295	1337	0.0944078
chr1	12537455	12539937	2483	0.122827
chr1	12541215	12541481	267	0.122125
chr1	12541911	12542418	508	0.146675
chr1	12543415	12543782	368	0.0917285
chr1	12554504	12555010	507	0.0681672
chr1	12555458	12556138	681	0.0760806
chr1	12556568	12557680	1113	0.0635923
chr1	12561682	12567321	5640	0.0711542
chr1	12569563	12569690	128	0.0958807
chr1	12570042	12570275	234	0.158994
chr1	12570608	12571882	1275	0.16364
chr1	12579943	12580787	845	0.0649561
chr1	12581088	12581821	734	0.0725405
chr1	12583732	12584060	329	0.0633594
chr1	12587531	12589504	1974	0.0893577
chr1	12592142	12592294	153	0.0632805
chr1	12592877	12592927	51	0.0676346
chr1	12600529	12601513	985	0.111981
chr1	12607204	12608670	1467	0.0823779
chr1	12609725	12610627	903	0.0732986
chr1	12612165	12613315	1151	0.107417
chr1	12618337	12618583	247	0.0570888
chr1	12624834	12626803	1970	0.123784
chr1	12627277	12628376	1100	0.0788223
chr1	12632477	12634259	1783	0.0780276
chr1	12634745	12635080	336	0.0501667
chr1	12641470	12641850	381	0.0683867
chr1	12642179	12642856	678	0.0881781
chr1	12645524	12646739	1216	0.0673224
chr1	12651793	12653404	1612	0.090191
chr1	12653721	12655178	1458	0.109459
chr1	12656506	12657412	907	0.124441
chr1	12657812	12664261	6450	0.123632
chr1	12667784	12670339	2556	0.110696
chr1	12673087	12675302	2216	0.131473
chr1	12680280	12682239	1960	0.0901717
chr1	12685205	12685993	789	0.0742799
chr1	13833872	13834064	193	0.0661071
chr1	13858421	13858924	504	0.0634699
chr1	13914366	13914943	578	0.0701435
chr1	13942070	13942965	896	0.0719037
chr1	14025763	14026360	598	0.107769
chr1	14032821	14033029	209	0.111863
chr1	14079263	14079706	444	0.0722765
chr1	14080747	14081151	405	0.104275
chr1	14087323	14088129	807	0.0772552
chr1	14088638	14089347	710	0.113121
chr1	14092845	14093192	348	0.185972
chr1	14093943	14094267	325	0.137498
chr1	14096535	14096583	49	0.0644817
chr1	14105607	14105921	315	0.0605378
chr1	14106496	14107076	581	0.0647996
chr1	14112622	14113789	1168	0.0750918
chr1	14115805	14118055	2251	0.0699018
chr1	14121693	14123357	1665	0.0971318
chr1	14123824	14124109	286	0.112462
chr1	14125447	14128736	3290	0.0845751
chr1	14135680	14136924	1245	0.0587447
chr1	14137268	14137932	665	0.062713
chr1	14153340	14153521	182	0.0906152
chr1	14408340	14409291	952	0.055544
chr1	14434414	14435631	1218	0.0790056
chr1	14439825	14440006	182	0.0622982
chr1	14491323	14491354	32	0.0863042
chr1	14523062	14523699	638	0.0749925
chr1	14524268	14524589	322	0.0840027
chr1	14562372	14562518	147	0.0679483
chr1	14562836	14563275	440	0.0657722
chr1	14668756	14669373	618	0.0816096
chr1	14669676	14670175	500	0.0712342
chr1	14741536	14742375	840	0.0537466
chr1	14752893	14753509	617	0.0897057
chr1	14755822	14756478	657	0.058933
chr1	14768744	14769398	655	0.0875766
chr1	14781575	14781953	379	0.0729295
chr1	14806595	14806773	179	0.0612092
chr1	14930375	14931952	1578	0.0604497
chr1	14974317	14974414	98	0.0535176
chr1	14994379	14996009	1631	0.115182
chr1	15004068	15004579	512	0.065695
chr1	15023263	15024759	1497	0.0705733
chr1	15033507	15034118	612	0.0515801
chr1	15041587	15041873	287	0.0499818
chr1	15049674	15051769	2096	0.0633286
chr1	15057823	15058440	618	0.064953
chr1	15069048	15069578	531	0.0939313
chr1	15075416	15076828	1413	0.0803269
chr1	15077272	15078241	970	0.0775106
chr1	15102779	15103946	1168	0.0632553
chr1	15112513	15113799	1287	0.0779806
chr1	15114129	15114269	141	0.0551253
chr1	15129998	15131560	1563	0.0647983
chr1	15161136	15163457	2322	0.057037
chr1	15190161	15190788	628	0.0558744
chr1	15206834	15207144	311	0.0599228
chr1	15207503	15209195	1693	0.0823593
chr1	15245518	15245973	456	0.0646828
chr1	15249712	15250290	579	0.117478
chr1	15260980	15261797	818	0.0690596
chr1	15265839	15269595	3757	0.0931556
chr1	15280693	15282391	1699	0.0716403
chr1	15283982	15286059	2078	0.0708702
chr1	15287454	15288045	592	0.0616491
chr1	15301604	15301779	176	0.0769579
chr1	15304859	15306415	1557	0.0733446
chr1	15306748	15308829	2082	0.0817385
chr1	15312074	15312227	154	0.0676676
chr1	15312832	15313728	897	0.0655744
chr1	15314057	15314352	296	0.0758512
chr1	15314777	15315709	933	0.0666319
chr1	15317994	15319032	1039	0.0681735
chr1	15320658	15321890	1233	0.0928537
chr1	15322250	15323415	1166	0.0711653
chr1	15337165	15340002	2838	0.0876843
chr1	15345196	15345500	305	0.0681735
chr1	15346318	15346955	638	0.0637039
chr1	15348132	15350367	2236	0.101102
chr1	15350684	15351604	921	0.0847695
chr1	15351906	15354016	2111	0.080808
chr1	15356434	15358629	2196	0.0819272
chr1	15379308	15380437	1130	0.0694337
chr1	15390776	15391365	590	0.0722883
chr1	15395654	15396374	721	0.0618655
chr1	15437896	15438795	900	0.0769124
chr1	15464460	15465628	1169	0.0651313
chr1	15481541	15486084	4544	0.101504
chr1	15505303	15507727	2425	0.0997734
chr1	15513491	15514723	1233	0.0872485
chr1	15515567	15517142	1576	0.0849635
chr1	15519226	15519661	436	0.0580004
chr1	15520920	15522795	1876	0.0624437
chr1	15533433	15536138	2706	0.0776192
chr1	15544614	15544881	268	0.0771034
chr1	15549630	15551374	1745	0.0729842
chr1	15552672	15554091	1420	0.0642671
chr1	15570152	15571115	964	0.0761357
chr1	15571488	15571667	180	0.101343
chr1	15572056	15573525	1470	0.114253
chr1	15574405	15575373	969	0.148478
chr1	15586997	15587971	975	0.0622085
chr1	15622458	15622701	244	0.0645735
chr1	15629192	15629610	419	0.0767461
chr1	15630034	15630083	50	0.0967666
chr1	15649048	15649367	320	0.090622
chr1	15658682	15659227	546	0.0722413
chr1	15673252	15674240	989	0.0540885
chr1	15678676	15679936	1261	0.0875367
chr1	15703068	15703859	792	0.0729308
chr1	15708753	15709565	813	0.06221
chr1	15737514	15739350	1837	0.117825
chr1	15739929	15741223	1295	0.074456
chr1	15742265	15744453	2189	0.118817
chr1	15745193	15746994	1802	0.076668
chr1	15751029	15751748	720	0.088482
chr1	15752773	15755266	2494	0.0956138
chr1	15757085	15757125	41	0.0633756
chr1	15770031	15770497	467	0.0757701
chr1	15827025	15828880	1856	0.10942
chr1	15847150	15847380	231	0.0725633
chr1	15899231	15899480	250	0.073661
chr1	15923003	15924138	1136	0.0768928
chr1	15942625	15942884	260	0.101509
chr1	15948033	15948176	144	0.152338
chr1	15948548	15948690	143	0.156411
chr1	15955300	15955733	434	0.0966529
chr1	15956518	15957137	620	0.0925031
chr1	15984979	15985365	387	0.0596133
chr1	16007609	16008008	400	0.0718588
chr1	16012516	16012851	336	0.176118
chr1	16014092	16014617	526	0.100828
chr1	16020096	16020494	399	0.0746681
chr1	16020985	16021145	161	0.110748
chr1	16022288	16023964	1677	0.144767
chr1	16024329	16024810	482	0.142392
chr1	16033181	16035520	2340	0.0932867
chr1	16041230	16041884	655	0.0788475
chr1	16049064	16050063	1000	0.0673832
chr1	16067173	16067983	811	0.101723
chr1	16074925	16076512	1588	0.0997233
chr1	16083067	16084058	992	0.0695064
chr1	16105825	16106241	417	0.122717
chr1	16106623	16107536	914	0.0769554
chr1	16113587	16113830	244	0.0887132
chr1	16126396	16127746	1351	0.0913733
chr1	16138048	16140076	2029	0.0853678
chr1	16147010	16147610	601	0.0824643
chr1	16159484	16160089	606	0.1593
chr1	16163253	16163873	621	0.171202
chr1	16184930	16185307	378	0.118013
chr1	16193137	16193143	7	0.116511
chr1	16199081	16199803	723	0.0722267
chr1	16209910	16210123	214	0.131663
chr1	16218170	16218271	102	0.0797672
chr1	16233100	16233957	858	0.0938806
chr1	16234854	16235188	335	0.114362
chr1	16236089	16236348	260	0.100375
chr1	16247377	16247898	522	0.0914491
chr1	16250496	16250815	320	0.0568603
chr1	16256264	16257158	895	0.0556702
chr1	16261814	16262969	1156	0.0699041
chr1	16263286	16264916	1631	0.074872
chr1	16265255	16267400	2146	0.109661
chr1	16273080	16274897	1818	0.0647152
chr1	16279281	16280361	1081	0.127292
chr1	16280903	16281387	485	0.127178
chr1	16281938	16282617	680	0.0825794
chr1	16283832	16285251	1420	0.0940185
chr1	16290483	16290565	83	0.221441
chr1	16294832	16295579	748	0.0875443
chr1	16299312	16300245	934	0.0650962
chr1	16320489	16322040	1552	0.082589
chr1	16331314	16332106	793	0.0799689
chr1	16340511	16342094	1584	0.0858354
chr1	16345293	16346399	1107	0.0714953
chr1	16373172	16373354	183	0.0793418
chr1	16381119	16381622	504	0.0828276
chr1	16382086	16382845	760	0.101538
chr1	16390510	16391567	1058	0.0758457
chr1	16394605	16396112	1508	0.0643499
chr1	16397243	16399258	2016	0.0688298
chr1	16406087	16407308	1222	0.0881811
chr1	16414209	16416060	1852	0.0653087
chr1	16416467	16417105	639	0.107573
chr1	16446629	16446702	74	0.058625
chr1	16459687	16460882	1196	0.075713
chr1	16461294	16462789	1496	0.071777
chr1	16466223	16466979	757	0.0902395
chr1	16473446	16474198	753	0.177944
chr1	16474660	16475140	481	0.0726236
chr1	16475792	16479548	3757	0.0874329
chr1	16484668	16486672	2005	0.0807609
chr1	16489215	16489438	224	0.0923017
chr1	16491125	16492463	1339	0.106311
chr1	16495913	16496735	823	0.0868056
chr1	16498565	16499129	565	0.0817179
chr1	16509724	16511146	1423	0.0897427
chr1	16513090	16513587	498	0.0856951
chr1	16521981	16522320	340	0.0603283
chr1	16531246	16531786	541	0.0580739
chr1	16534012	16534882	871	0.089604
chr1	16537738	16538062	325	0.0573362
chr1	16542219	16542552	334	0.107361
chr1	16544564	16545905	1342	0.108118
chr1	16551195	16552875	1681	0.0732571
chr1	16570311	16572088	1778	0.0873429
chr1	16574638	16575541	904	0.08111
chr1	16577511	16578456	946	0.0620058
chr1	16612184	16613215	1032	0.073517
chr1	16614296	16615178	883	0.0797544
chr1	16623558	16624340	783	0.130103
chr1	16625405	16626433	1029	0.122487
chr1	16629304	16629377	74	0.0533809
chr1	16645311	16645679	369	0.0846291
chr1	16651180	16651305	126	0.0823157
chr1	16662456	16662797	342	0.114918
chr1	16679780	16680427	648	0.128551
chr1	16712050	16714460	2411	0.0762557
chr1	16715289	16716275	987	0.058404
chr1	16717970	16719535	1566	0.0790765
chr1	16719900	16720303	404	0.0924901
chr1	16769585	16771177	1593	0.116259
chr1	16777703	16778063	361	0.0584062
chr1	16778369	16779567	1199	0.0522558
chr1	16782809	16783678	870	0.082841
chr1	16815127	16815651	525	0.0614461
chr1	16819476	16819693	218	0.135251
chr1	17294282	17295840	1559	0.061019
chr1	17299201	17300180	980	0.080738
chr1	17303529	17304887	1359	0.0704786
chr1	17308032	17309665	1634	0.0870664
chr1	17312355	17312636	282	0.0747564
chr1	17325954	17327678	1725	0.0716519
chr1	17334940	17335183	244	0.0738348
chr1	17335490	17335788	299	0.104741
chr1	17336116	17337158	1043	0.0817808
chr1	17338892	17339625	734	0.0634375
chr1	17354254	17356077	1824	0.0822095
chr1	17371669	17372187	519	0.0753576
chr1	17381618	17381742	125	0.0689315
chr1	17390121	17390297	177	0.0707028
chr1	17390642	17390994	353	0.0703921
chr1	17391480	17391922	443	0.0668911
chr1	17408958	17409499	542	0.0599561
chr1	17424185	17426625	2441	0.0669788
chr1	17448350	17448726	377	0.0766447
chr1	17452921	17453297	377	0.0837329
chr1	17455567	17455700	134	0.0643341
chr1	17519497	17520935	1439	0.0611353
chr1	17525444	17525634	191	0.0495168
chr1	17542174	17542856	683	0.0537879
chr1	17599126	17601672	2547	0.067397
chr1	17685287	17686050	764	0.0747362
chr1	17690672	17690876	205	0.061528
chr1	17809576	17809610	35	0.0714031
chr1	17819537	17819968	432	0.0713402
chr1	17847971	17849174	1204	0.0778378
chr1	17854964	17855412	449	0.0866131
chr1	17857180	17858721	1542	0.107866
chr1	17860401	17860479	79	0.0569259
chr1	17861957	17863519	1563	0.0747514
chr1	17863874	17865114	1241	0.0974979
chr1	17874132	17874863	732	0.0633845
chr1	17876758	17878874	2117	0.0761399
chr1	17892431	17892741	311	0.0568008
chr1	17911905	17913663	1759	0.0758876
chr1	17916207	17917840	1634	0.0930904
chr1	17922201	17923306	1106	0.060488
chr1	17953231	17954570	1340	0.0624071
chr1	17962155	17962729	575	0.0561583
chr1	17963596	17963955	360	0.0528173
chr1	17966081	17967219	1139	0.0769303
chr1	17974596	17976630	2035	0.0665965
chr1	17979733	17981275	1543	0.0743283
chr1	17985710	17986749	1040	0.058787
chr1	17989565	17989774	210	0.0569377
chr1	17990158	17992706	2549	0.0630757
chr1	17999559	18001405	1847	0.0986425
chr1	18011010	18012381	1372	0.0855318
chr1	18012984	18013225	242	0.0858128
chr1	18024197	18024653	457	0.0549955
chr1	18036393	18037042	650	0.0626975
chr1	18526022	18527569	1548	0.054315
chr1	18540142	18540281	140	0.0566892
chr1	18540751	18540963	213	0.0519071
chr1	18560972	18561525	554	0.056811
chr1	18698379	18698841	463	0.0610897
chr1	18719746	18720018	273	0.0620883
chr1	18742719	18742837	119	0.0550848
chr1	18794804	18795281	478	0.0560839
chr1	18795634	18796208	575	0.0561086
chr1	18910834	18911689	856	0.0728177
chr1	18999587	18999726	140	0.0517329
chr1	19002812	19003620	809	0.0641726
chr1	19050477	19051795	1319	0.076091
chr1	19056910	19058137	1228	0.065599
chr1	19164349	19164993	645	0.0578536
chr1	19192997	19193407	411	0.0729703
chr1	19196077	19198163	2087	0.0661729
chr1	19226855	19228111	1257	0.0868155
chr1	19240604	19241068	465	0.117726
chr1	19245217	19245402	186	0.0506647
chr1	19249355	19252240	2886	0.0953
chr1	19252685	19257402	4718	0.0799555
chr1	19262438	19264548	2111	0.0677611
chr1	19280085	19281046	962	0.104455
chr1	19288675	19289516	842	0.0992023
chr1	19289871	19291168	1298	0.0753444
chr1	19297676	19297836	161	0.0605795
chr1	19298154	19298586	433	0.094179
chr1	19299239	19300132	894	0.073606
chr1	19312403	19313907	1505	0.0530859
chr1	19324767	19325054	288	0.0590891
chr1	19336494	19337842	1349	0.0757391
chr1	19359709	19360901	1193	0.0721787
chr1	19361573	19362712	1140	0.0710916
chr1	19372948	19374340	1393	0.0725632
chr1	19382528	19383967	1440	0.0588831
chr1	19395231	19396631	1401	0.0685038
chr1	19399307	19399776	470	0.0787011
chr1	19415092	19416324	1233	0.0724256
chr1	19416779	19417363	585	0.054153
chr1	19431579	19432362	784	0.0519576
chr1	19448526	19449673	1148	0.0639935
chr1	19490180	19490380	201	0.0536548
chr1	19491216	19491778	563	0.0667865
chr1	19505573	19505791	219	0.103573
chr1	19506481	19506572	92	0.0896736
chr1	19527589	19528810	1222	0.104441
chr1	19529115	19529362	248	0.154072
chr1	19532129	19533860	1732	0.0862145
chr1	19537791	19537980	190	0.0625706
chr1	19543475	19543769	295	0.0734388
chr1	19545653	19546174	522	0.0658006
chr1	19546692	19546973	282	0.0803742
chr1	19547280	19548433	1154	0.0758129
chr1	19567578	19568101	524	0.0552145
chr1	19585932	19587554	1623	0.0883988
chr1	19599690	19600391	702	0.0794429
chr1	19635818	19636306	489	0.0634567
chr1	19641694	19643094	1401	0.0712864
chr1	19643531	19644196	666	0.0656544
chr1	19656585	19657799	1215	0.0532021
chr1	19658696	19659471	776	0.0536952
chr1	19662098	19663397	1300	0.0784328
chr1	19666217	19668671	2455	0.0802183
chr1	19673680	19674641	962	0.0900103
chr1	19688117	19689638	1522	0.0731271
chr1	19691094	19693169	2076	0.0850338
chr1	19693516	19694630	1115	0.109438
chr1	19700393	19702759	2367	0.0622605
chr1	19704635	19705493	859	0.0534258
chr1	19705882	19706088	207	0.0575556
chr1	19706454	19707391	938	0.0713708
chr1	19710012	19710402	391	0.076777
chr1	19710732	19711006	275	0.0744974
chr1	19711383	19713249	1867	0.0685207
chr1	19713566	19714800	1235	0.0710039
chr1	19722367	19723471	1105	0.0590937
chr1	19723954	19725349	1396	0.0730112
chr1	19725668	19727557	1890	0.072505
chr1	19727895	19728294	400	0.0728727
chr1	19728610	19729269	660	0.089812
chr1	19736408	19737483	1076	0.0858036
chr1	19738118	19738860	743	0.0703165
chr1	19741636	19743602	1967	0.0751751
chr1	19744778	19746730	1953	0.0963862
chr1	19749771	19749917	147	0.101881
chr1	19750394	19751479	1086	0.0872033
chr1	19752258	19754315	2058	0.0704239
chr1	19761786	19762855	1070	0.11995
chr1	19765078	19766312	1235	0.0918354
chr1	19775456	19776149	694	0.0858447
chr1	19777591	19778327	737	0.0919699
chr1	19778679	19780509	1831	0.0843596
chr1	19781496	19782205	710	0.118055
chr1	19783011	19783235	225	0.0856736
chr1	19791075	19791170	96	0.105125
chr1	19792327	19792999	673	0.0672356
chr1	19794329	19795650	1322	0.103869
chr1	19796102	19796925	824	0.115538
chr1	19800783	19802141	1359	0.0896268
chr1	19802492	19803602	1111	0.104111
chr1	19803932	19804484	553	0.114153
chr1	19806066	19808364	2299	0.0949002
chr1	19808693	19809758	1066	0.098026
chr1	19814883	19815349	467	0.0746037
chr1	19818577	19819290	714	0.0594832
chr1	19819866	19820278	413	0.0661735
chr1	19820584	19820810	227	0.084573
chr1	19821179	19822387	1209	0.120529
chr1	19832219	19832720	502	0.0732604
chr1	19833638	19834973	1336	0.0727231
chr1	19849207	19849799	593	0.0696335
chr1	19851478	19851703	226	0.0790862
chr1	19864638	19865044	407	0.0573014
chr1	19878450	19879316	867	0.0660988
chr1	19881041	19881542	502	0.0893341
chr1	19907323	19907623	301	0.0641421
chr1	19922521	19922959	439	0.0929132
chr1	19924755	19925036	282	0.143138
chr1	19925535	19926891	1357	0.0906344
chr1	19927870	19928049	180	0.118866
chr1	19935568	19935882	315	0.0615581
chr1	19956103	19956758	656	0.0631597
chr1	19960434	19961034	601	0.0631588
chr1	19974108	19975234	1127	0.0886285
chr1	19982147	19982680	534	0.0595594
chr1	19987169	19987723	555	0.117109
chr1	19990438	19990783	346	0.0719377
chr1	20023957	20024962	1006	0.0633734
chr1	20032209	20032380	172	0.0639135
chr1	20032687	20033255	569	0.0706102
chr1	20033587	20033843	257	0.0643407
chr1	20089850	20090343	494	0.0662017
chr1	20119542	20119620	79	0.0565562
chr1	20120059	20121652	1594	0.0627638
chr1	20127196	20128199	1004	0.126479
chr1	20142056	20143217	1162	0.0707887
chr1	20304392	20304799	408	0.0563033
chr1	20398643	20399445	803	0.0732657
chr1	20413909	20414588	680	0.0758367
chr1	20421036	20421163	128	0.054624
chr1	20422742	20422966	225	0.090406
chr1	20423400	20423709	310	0.075833
chr1	20424687	20425183	497	0.052546
chr1	20433090	20433512	423	0.0771963
chr1	20433817	20434160	344	0.0976243
chr1	20452515	20453115	601	0.0597828
chr1	20472579	20474882	2304	0.0596093
chr1	20497651	20499628	1978	0.0869152
chr1	20510721	20512188	1468	0.115216
chr1	20535885	20536540	656	0.0525015
chr1	20606006	20606342	337	0.0575556
chr1	20696939	20697526	588	0.0550105
chr1	20706687	20707513	827	0.0721144
chr1	20730040	20731182	1143	0.0530664
chr1	20809995	20810102	108	0.0700382
chr1	20822758	20824884	2127	0.0709367
chr1	20827117	20827510	394	0.052883
chr1	20857756	20859453	1698	0.0806344
chr1	20884661	20885617	957	0.0690135
chr1	20913627	20914356	730	0.0798215
chr1	20940546	20940743	198	0.0523885
chr1	20970159	20970262	104	0.0606567
chr1	20976443	20978114	1672	0.0832098
chr1	21014995	21015263	269	0.0607541
chr1	21024627	21025820	1194	0.0571461
chr1	21043262	21043596	335	0.0765995
chr1	21044874	21045514	641	0.0951397
chr1	21108142	21108617	476	0.0774569
chr1	21110565	21110725	161	0.0766201
chr1	21119362	21119590	229	0.0685096
chr1	21119924	21120286	363	0.073921
chr1	21171832	21171893	62	0.0709851
chr1	21195867	21196723	857	0.0770281
chr1	21286551	21286687	137	0.0833011
chr1	21287425	21287906	482	0.0837935
chr1	21312440	21312660	221	0.0609533
chr1	21317651	21317798	148	0.0872668
chr1	21335853	21336027	175	0.0804126
chr1	21351626	21351935	310	0.0829017
chr1	21361177	21362943	1767	0.0711304
chr1	21397633	21398169	537	0.0728258
chr1	21417747	21417990	244	0.139641
chr1	21425326	21425558	233	0.0780634
chr1	21427044	21427981	938	0.127328
chr1	21440537	21440901	365	0.127072
chr1	21487123	21487239	117	0.055401
chr1	21498454	21498854	401	0.102659
chr1	21503960	21504236	277	0.178442
chr1	21543380	21544960	1581	0.0857163
chr1	21555357	21555825	469	0.0621516
chr1	21556305	21556941	637	0.0683508
chr1	21570314	21570693	380	0.0491915
chr1	21573194	21574189	996	0.0712745
chr1	21588005	21589665	1661	0.0969189
chr1	21594180	21596448	2269	0.102639
chr1	21596749	21597023	275	0.0839365
chr1	21597345	21597979	635	0.0642733
chr1	21610445	21612097	1653	0.125751
chr1	21615519	21615959	441	0.0912753
chr1	21618438	21618790	353	0.0845702
chr1	21619150	21621395	2246	0.11309
chr1	21622472	21622801	330	0.112597
chr1	21623270	21623929	660	0.0851031
chr1	21624570	21625596	1027	0.0620765
chr1	21627709	21628179	471	0.0795609
chr1	21631915	21632750	836	0.0698665
chr1	21633121	21634539	1419	0.0804016
chr1	21635007	21637903	2897	0.110767
chr1	21641803	21642008	206	0.0889934
chr1	21642378	21645579	3202	0.08143
chr1	21648398	21649342	945	0.103933
chr1	21651178	21653363	2186	0.131556
chr1	21659574	21660498	925	0.0883767
chr1	21660813	21661157	345	0.0869635
chr1	21661738	21662452	715	0.101491
chr1	21662909	21664138	1230	0.0765909
chr1	21673093	21674111	1019	0.068586
chr1	21675499	21677600	2102	0.0621071
chr1	21691059	21691461	403	0.0964475
chr1	21845533	21846027	495	0.070825
chr1	21846339	21846741	403	0.0702612
chr1	21848000	21848136	137	0.0552863
chr1	21850527	21852608	2082	0.0985772
chr1	21863678	21864687	1010	0.071585
chr1	21864945	21865685	741	0.0620665
chr1	21893243	21894414	1172	0.0621886
chr1	21897120	21897887	768	0.0612694
chr1	21909296	21910008	713	0.0657694
chr1	21915383	21916903	1521	0.07919
chr1	21921478	21922399	922	0.0592814
chr1	21933218	21933662	445	0.0971227
chr1	21934726	21936089	1364	0.0843277
chr1	21942402	21943120	719	0.061102
chr1	21950195	21951706	1512	0.0689082
chr1	21957162	21957906	745	0.0629004
chr1	21969178	21970665	1488	0.0628283
chr1	21997105	21997737	633	0.0944341
chr1	22017180	22017545	366	0.0757367
chr1	22018479	22018669	191	0.0583232
chr1	22032981	22033227	247	0.0919928
chr1	22061818	22061921	104	0.062211
chr1	22087277	22087362	86	0.107657
chr1	22094438	22094929	492	0.120963
chr1	22099893	22100297	405	0.0822889
chr1	22103637	22103856	220	0.0939144
chr1	22106473	22106885	413	0.202267
chr1	22107609	22108024	416	0.0819027
chr1	22115928	22115993	66	0.0531905
chr1	22146218	22146766	549	0.113278
chr1	22152976	22153475	500	0.0658362
chr1	22180228	22180716	489	0.0538265
chr1	22201393	22202276	884	0.062622
chr1	22204506	22205989	1484	0.0604569
chr1	22208869	22209048	180	0.111556
chr1	22209401	22209761	361	0.135864
chr1	22217530	22218684	1155	0.0587951
chr1	22219793	22221373	1581	0.0625725
chr1	22223149	22225595	2447	0.0992214
chr1	22226003	22227633	1631	0.103515
chr1	22230323	22231962	1640	0.077096
chr1	22232662	22234470	1809	0.0832839
chr1	22236251	22237522	1272	0.0909575
chr1	22240267	22242280	2014	0.0966881
chr1	22247443	22248611	1169	0.0822337
chr1	22249893	22252704	2812	0.105468
chr1	22264893	22267197	2305	0.106071
chr1	22268082	22269966	1885	0.121869
chr1	22274987	22276058	1072	0.069754
chr1	22277765	22278295	531	0.0568088
chr1	22286171	22286523	353	0.103941
chr1	22287081	22287787	707	0.0867396
chr1	22288526	22288999	474	0.0892195
chr1	22298221	22298670	450	0.0781739
chr1	22321820	22321882	63	0.0674799
chr1	22334978	22334990	13	0.0661854
chr1	22353909	22354538	630	0.0758987
chr1	22384500	22384767	268	0.163826
chr1	22385271	22386562	1292	0.163452
chr1	22387434	22387637	204	0.182071
chr1	22388901	22389398	498	0.178331
chr1	22390940	22391075	136	0.267387
chr1	22391419	22391601	183	0.242125
chr1	22393549	22395002	1454	0.159217
chr1	22395915	22396469	555	0.180164
chr1	22397832	22398287	456	0.0773291
chr1	22409762	22410113	352	0.146244
chr1	22420301	22420617	317	0.0822825
chr1	22421069	22421113	45	0.0797802
chr1	22429800	22431025	1226	0.0769816
chr1	22440827	22442256	1430	0.0826457
chr1	22443054	22446942	3889	0.0671272
chr1	22448032	22449993	1962	0.0616695
chr1	22450474	22451194	721	0.0561261
chr1	22452839	22454023	1185	0.0766251
chr1	22461240	22462095	856	0.0678895
chr1	22482981	22483333	353	0.0522153
chr1	22489817	22491172	1356	0.0709276
chr1	22491527	22492126	600	0.0614007
chr1	22512673	22513600	928	0.0708892
chr1	22529323	22529643	321	0.0668913
chr1	22568241	22569272	1032	0.0720287
chr1	22579477	22579705	229	0.0661357
chr1	22583837	22586137	2301	0.0685172
chr1	22594237	22594747	511	0.0554127
chr1	22597560	22598326	767	0.0991596
chr1	22644860	22645152	293	0.060417
chr1	22652931	22654239	1309	0.0544618
chr1	22665580	22667345	1766	0.0675664
chr1	22796805	22797308	504	0.102659
chr1	22797610	22798637	1028	0.0795601
chr1	22818546	22818918	373	0.103081
chr1	22853878	22854753	876	0.061782
chr1	22855120	22856666	1547	0.0570516
chr1	22883130	22883827	698	0.0615643
chr1	22930413	22930977	565	0.0540322
chr1	22957118	22957949	832	0.067175
chr1	23028565	23029875	1311	0.0594429
chr1	23035760	23036414	655	0.130396
chr1	23040464	23040849	386	0.0645111
chr1	23041198	23041795	598	0.0690686
chr1	23043172	23044353	1182	0.0613418
chr1	23072065	23073368	1304	0.0751628
chr1	23085629	23087676	2048	0.0693654
chr1	23126092	23127030	939	0.0599747
chr1	23143806	23143905	100	0.0517492
chr1	23154852	23157691	2840	0.0693229
chr1	23164074	23164965	892	0.0553128
chr1	23175971	23177321	1351	0.0612603
chr1	23206348	23207595	1248	0.0826225
chr1	23221350	23223935	2586	0.064701
chr1	23243011	23243986	976	0.0664404
chr1	23290719	23292236	1518	0.104985
chr1	23352726	23353171	446	0.0900763
chr1	23390722	23391218	497	0.0597806
chr1	23396092	23396373	282	0.0562073
chr1	23406359	23408016	1658	0.0523732
chr1	23423444	23424065	622	0.117652
chr1	23424447	23425614	1168	0.112889
chr1	23426414	23427042	629	0.120814
chr1	23428568	23429222	655	0.0793847
chr1	23429681	23430022	342	0.0681267
chr1	23437958	23438224	267	0.0671056
chr1	23442314	23442940	627	0.0941089
chr1	23451149	23451785	637	0.0971426
chr1	23452302	23452460	159	0.0910794
chr1	23476601	23477429	829	0.090293
chr1	23490509	23490759	251	0.0965554
chr1	23503519	23503635	117	0.125994
chr1	23536850	23537380	531	0.0793246
chr1	23538509	23539801	1293	0.0609685
chr1	23593954	23594178	225	0.0538596
chr1	23605937	23606756	820	0.114854
chr1	23652534	23652690	157	0.08167
chr1	23653365	23653906	542	0.0755838
chr1	23658429	23658933	505	0.0649633
chr1	23664142	23664487	346	0.151149
chr1	23698079	23699372	1294	0.0836941
chr1	23717217	23717397	181	0.0748506
chr1	23717762	23717884	123	0.0708845
chr1	23728212	23728378	167	0.0565892
chr1	23731732	23732926	1195	0.0726345
chr1	23743760	23746079	2320	0.0824603
chr1	23747063	23749638	2576	0.0995628
chr1	23753853	23754814	962	0.113358
chr1	23766720	23767077	358	0.0591597
chr1	23767596	23768304	709	0.059427
chr1	23777453	23777949	497	0.0726934
chr1	23778597	23779872	1276	0.0625244
chr1	23783595	23784936	1342	0.0689252
chr1	23785343	23786288	946	0.0774942
chr1	23788987	23789551	565	0.0636531
chr1	23793509	23795103	1595	0.070408
chr1	23795785	23797462	1678	0.135601
chr1	23798922	23800445	1524	0.0897701
chr1	23803921	23804723	803	0.0814345
chr1	23806389	23806524	136	0.0953903
chr1	23823162	23824587	1426	0.0791712
chr1	23828717	23828890	174	0.0516179
chr1	23847956	23849569	1614	0.0666031
chr1	23849940	23850303	364	0.0622618
chr1	23856135	23856401	267	0.0914435
chr1	23866824	23867156	333	0.105212
chr1	23869843	23871501	1659	0.085318
chr1	23875045	23876025	981	0.157106
chr1	23896481	23896727	247	0.109696
chr1	23906998	23908016	1019	0.0782475
chr1	23953428	23953653	226	0.0822208
chr1	24022869	24024266	1398	0.0993567
chr1	24025240	24025540	301	0.0974908
chr1	24031223	24031346	124	0.0586349
chr1	24045607	24047223	1617	0.110134
chr1	24062089	24062129	41	0.08899
chr1	24064380	24064499	120	0.0746869
chr1	24069091	24069431	341	0.162608
chr1	24085819	24086828	1010	0.0714841
chr1	24087267	24087566	300	0.0656432
chr1	24119580	24120839	1260	0.0739931
chr1	24130757	24131095	339	0.0672378
chr1	24131430	24132325	896	0.0548095
chr1	24137038	24137624	587	0.0784989
chr1	24146941	24147049	109	0.0572505
chr1	24193227	24193865	639	0.127653
chr1	24195587	24196423	837	0.123695
chr1	24227390	24227749	360	0.0629723
chr1	24248891	24249571	681	0.103569
chr1	24257040	24258120	1081	0.0783897
chr1	24302860	24303919	1060	0.108803
chr1	24348143	24348512	370	0.125035
chr1	24348820	24349093	274	0.0991579
chr1	24361138	24361658	521	0.055156
chr1	24362364	24362785	422	0.0598027
chr1	24376438	24376840	403	0.0838314
chr1	24402234	24402444	211	0.0520221
chr1	24410786	24411015	230	0.0583418
chr1	24415541	24416868	1328	0.0798124
chr1	24452651	24453386	736	0.107676
chr1	24453819	24454098	280	0.0883097
chr1	24464362	24464849	488	0.0636606
chr1	24469478	24470885	1408	0.0742967
chr1	24476055	24476760	706	0.0719596
chr1	24511831	24513298	1468	0.0869672
chr1	24519677	24520330	654	0.114622
chr1	24528829	24530684	1856	0.103702
chr1	24603340	24605665	2326	0.0683936
chr1	24620698	24622799	2102	0.0774173
chr1	24636552	24638256	1705	0.0577402
chr1	24650240	24651861	1622	0.057792
chr1	24652193	24652557	365	0.0808816
chr1	24652939	24653174	236	0.0986854
chr1	24661817	24662103	287	0.0519358
chr1	24662506	24663333	828	0.0541215
chr1	24690538	24692124	1587	0.0759925
chr1	24704847	24706272	1426	0.0634741
chr1	24710446	24713987	3542	0.110007
chr1	24714784	24715152	369	0.109091
chr1	24715669	24715872	204	0.0954405
chr1	24737085	24737609	525	0.0759176
chr1	24737912	24738219	308	0.110527
chr1	24738585	24739090	506	0.141854
chr1	24744940	24746355	1416	0.07904
chr1	24746746	24746897	152	0.0694485
chr1	24755072	24755665	594	0.0653757
chr1	24757029	24757218	190	0.0719531
chr1	24763235	24763516	282	0.0599201
chr1	24764123	24765518	1396	0.0795163
chr1	24779438	24780346	909	0.0563248
chr1	24806146	24807797	1652	0.0765548
chr1	24810671	24810931	261	0.0630917
chr1	24827893	24828549	657	0.13855
chr1	24830779	24831202	424	0.0654196
chr1	24831874	24831932	59	0.0724808
chr1	24833424	24834599	1176	0.0553472
chr1	24893555	24893780	226	0.0601774
chr1	24963666	24963873	208	0.0638987
chr1	24989690	24990151	462	0.0661195
chr1	25001538	25001738	201	0.064625
chr1	25005283	25005535	253	0.0639614
chr1	25020508	25022616	2109	0.0866724
chr1	25027450	25027704	255	0.0572452
chr1	25029647	25029997	351	0.0742199
chr1	25032620	25032666	47	0.0684366
chr1	25040257	25040567	311	0.0626944
chr1	25041035	25041864	830	0.0699981
chr1	25043082	25045798	2717	0.0822141
chr1	25050779	25052168	1390	0.143057
chr1	25068134	25070672	2539	0.107482
chr1	25083815	25083956	142	0.112348
chr1	25086982	25087374	393	0.135343
chr1	25107922	25108189	268	0.0771299
chr1	25118883	25119518	636	0.184976
chr1	25133294	25133522	229	0.119045
chr1	25140272	25140615	344	0.0961041
chr1	25176015	25176572	558	0.13533
chr1	25191739	25192528	790	0.106047
chr1	25235906	25236528	623	0.121984
chr1	25247259	25248249	991	0.06264
chr1	25248791	25248961	171	0.0539986
chr1	25327307	25328166	860	0.0748118
chr1	25336458	25336927	470	0.0830196
chr1	25362808	25364579	1772	0.0791819
chr1	25381488	25381909	422	0.0504039
chr1	25390301	25390990	690	0.0868862
chr1	25394373	25395915	1543	0.0683602
chr1	25397967	25399656	1690	0.0566311
chr1	25406829	25407112	284	0.0915936
chr1	25407484	25407903	420	0.0647637
chr1	25411433	25412200	768	0.0556914
chr1	25434388	25435157	770	0.0692474
chr1	25472000	25472381	382	0.0518605
chr1	25551997	25552076	80	0.0570001
chr1	25567130	25567503	374	0.145946
chr1	25572460	25572636	177	0.149587
chr1	25581204	25582911	1708	0.066577
chr1	25677170	25677378	209	0.0802818
chr1	25760013	25760363	351	0.123767
chr1	25763246	25764139	894	0.182427
chr1	25764473	25764549	77	0.134097
chr1	25767382	25767608	227	0.0573492
chr1	25770156	25770480	325	0.0845337
chr1	25771365	25771658	294	0.0997863
chr1	25791115	25792365	1251	0.0815676
chr1	25795613	25795979	367	0.118037
chr1	25824059	25824846	788	0.0613874
chr1	25831400	25832513	1114	0.0987335
chr1	25851014	25852168	1155	0.0625422
chr1	25860515	25861298	784	0.0758807
chr1	25874086	25874688	603	0.114113
chr1	25878341	25879282	942	0.122755
chr1	25882310	25883275	966	0.0878831
chr1	25883674	25884573	900	0.0992881
chr1	25886609	25887596	988	0.0638993
chr1	25888095	25890596	2502	0.081282
chr1	25895267	25898609	3343	0.0670244
chr1	25907415	25909290	1876	0.0945365
chr1	25915337	25915532	196	0.0745681
chr1	25933378	25934597	1220	0.132525
chr1	25940824	25942215	1392	0.154713
chr1	25949059	25949766	708	0.0963551
chr1	25950219	25950885	667	0.0922924
chr1	25951303	25951336	34	0.0981582
chr1	25951782	25952413	632	0.0843374
chr1	25967367	25969308	1942	0.0808355
chr1	25973886	25974665	780	0.062325
chr1	25977592	25979647	2056	0.100488
chr1	25979971	25980993	1023	0.0843585
chr1	25982123	25982418	296	0.0929161
chr1	25982880	25982955	76	0.0938329
chr1	25994490	25996078	1589	0.084065
chr1	25998959	25999818	860	0.0636672
chr1	26000189	26001528	1340	0.0804781
chr1	26010331	26011318	988	0.0708881
chr1	26015106	26016004	899	0.070272
chr1	26016314	26016744	431	0.0625989
chr1	26021288	26022841	1554	0.138706
chr1	26025896	26028300	2405	0.0687123
chr1	26029376	26031817	2442	0.135229
chr1	26032120	26032246	127	0.119546
chr1	26032759	26033209	451	0.088538
chr1	26033543	26034297	755	0.0650047
chr1	26035673	26036182	510	0.0876096
chr1	26049493	26050393	901	0.0900633
chr1	26055688	26057636	1949	0.0707515
chr1	26063816	26065167	1352	0.0951961
chr1	26068884	26071359	2476	0.0786568
chr1	26073581	26074805	1225	0.0646036
chr1	26098858	26099369	512	0.0991335
chr1	26101088	26102228	1141	0.0626405
chr1	26111485	26112699	1215	0.0761261
chr1	26129126	26129675	550	0.12006
chr1	26130925	26131810	886	0.0947001
chr1	26136443	26137720	1278	0.0910381
chr1	26142692	26144071	1380	0.0931586
chr1	26186936	26187592	657	0.168617
chr1	26188624	26190068	1445	0.0579135
chr1	26202614	26202985	372	0.146001
chr1	26235455	26236096	642	0.0724519
chr1	26256468	26257569	1102	0.0651658
chr1	26280872	26281162	291	0.0517734
chr1	26299985	26300356	372	0.0586022
chr1	26304659	26304899	241	0.0526141
chr1	26325177	26325509	333	0.0947129
chr1	26341375	26341387	13	0.0615794
chr1	26341982	26342300	319	0.0725134
chr1	26342609	26343419	811	0.0636761
chr1	26365212	26365360	149	0.0582294
chr1	26405425	26405893	469	0.0979987
chr1	26406721	26407163	443	0.101278
chr1	26407532	26408943	1412	0.0795379
chr1	26453393	26454896	1504	0.0801032
chr1	26491047	26492646	1600	0.117468
chr1	26496921	26497550	630	0.0967908
chr1	26559934	26560306	373	0.121753
chr1	26604889	26605969	1081	0.101643
chr1	26607273	26607954	682	0.177235
chr1	26613105	26615279	2175	0.0961447
chr1	26673933	26674677	745	0.0814697
chr1	26674997	26675085	89	0.0587131
chr1	26722600	26723079	480	0.0858904
chr1	26773066	26773703	638	0.0637481
chr1	26774084	26774245	162	0.0848189
chr1	26774776	26774961	186	0.0949479
chr1	26778398	26778833	436	0.0566832
chr1	26796242	26797816	1575	0.124625
chr1	26802530	26802776	247	0.162591
chr1	26803689	26804605	917	0.129535
chr1	26857642	26859216	1575	0.089365
chr1	26866162	26866447	286	0.118421
chr1	26868067	26871256	3190	0.0826348
chr1	26888071	26888462	392	0.0645582
chr1	26888795	26889094	300	0.0923465
chr1	26900765	26902692	1928	0.076346
chr1	26949402	26950192	791	0.0912547
chr1	27012847	27012984	138	0.0861858
chr1	27037138	27037909	772	0.0823516
chr1	27044718	27046153	1436	0.116643
chr1	27046726	27047391	666	0.186506
chr1	27057469	27057788	320	0.0750855
chr1	27067562	27068387	826	0.148842
chr1	27077467	27077877	411	0.162999
chr1	27078365	27078698	334	0.132466
chr1	27082513	27082772	260	0.111048
chr1	27083955	27085274	1320	0.0950868
chr1	27087503	27087570	68	0.0851673
chr1	27087892	27088267	376	0.0981005
chr1	27089329	27089994	666	0.06809
chr1	27096392	27098098	1707	0.08284
chr1	27105304	27107763	2460	0.0718523
chr1	27112127	27112325	199	0.0900082
chr1	27124930	27124967	38	0.059169
chr1	27125615	27126454	840	0.0866624
chr1	27127307	27127681	375	0.0957972
chr1	27155382	27156706	1325	0.146172
chr1	27162525	27163027	503	0.0571998
chr1	27190111	27190693	583	0.0817614
chr1	27203160	27203749	590	0.0648943
chr1	27214630	27215607	978	0.0679855
chr1	27217316	27217729	414	0.0685181
chr1	27242561	27243730	1170	0.0581816
chr1	27247289	27247775	487	0.113661
chr1	27272803	27273064	262	0.0637102
chr1	27327225	27328126	902	0.104479
chr1	27333084	27333525	442	0.081298
chr1	27335552	27335819	268	0.0926436
chr1	27353339	27354308	970	0.121823
chr1	27383323	27383429	107	0.0653619
chr1	27424586	27425659	1074	0.0908352
chr1	27444884	27446298	1415	0.105018
chr1	27455875	27456396	522	0.0615021
chr1	27459288	27459581	294	0.0959949
chr1	27460543	27461479	937	0.0593312
chr1	27462616	27464719	2104	0.133511
chr1	27465033	27466852	1820	0.103293
chr1	27467267	27467436	170	0.0892896
chr1	27468015	27468687	673	0.117477
chr1	27469788	27470288	501	0.116815
chr1	27475972	27476322	351	0.081245
chr1	27476753	27477562	810	0.150103
chr1	27477873	27478146	274	0.108522
chr1	27480516	27481103	588	0.0966857
chr1	27487886	27488484	599	0.0733574
chr1	27518752	27519590	839	0.0961949
chr1	27569998	27570526	529	0.0782864
chr1	27570847	27571940	1094	0.0732064
chr1	27572305	27572809	505	0.0849183
chr1	27578031	27578396	366	0.0967616
chr1	27580825	27581003	179	0.104959
chr1	27581397	27581563	167	0.103585
chr1	27582328	27582355	28	0.0869212
chr1	27586013	27586332	320	0.0562236
chr1	27621478	27622188	711	0.0822199
chr1	27649812	27650375	564	0.077959
chr1	27651476	27651831	356	0.0563458
chr1	27654159	27655966	1808	0.060286
chr1	27665003	27665925	923	0.0602777
chr1	27669132	27670329	1198	0.0890477
chr1	27672518	27673125	608	0.0854743
chr1	27674664	27674944	281	0.0835133
chr1	27677596	27678038	443	0.0623037
chr1	27680285	27680784	500	0.053828
chr1	27683254	27684235	982	0.0850913
chr1	27694390	27694884	495	0.13378
chr1	27699018	27700100	1083	0.106458
chr1	27700427	27701171	745	0.0833188
chr1	27705867	27708402	2536	0.0910196
chr1	27750290	27751946	1657	0.0792614
chr1	27752473	27752678	206	0.0810986
chr1	27757271	27757498	228	0.212901
chr1	27761374	27761870	497	0.159582
chr1	27762568	27762911	344	0.0883815
chr1	27796178	27796684	507	0.124262
chr1	27801678	27801970	293	0.157945
chr1	27802387	27802550	164	0.175462
chr1	27805374	27805535	162	0.115541
chr1	27832272	27832958	687	0.0904833
chr1	27838987	27840448	1462	0.0864099
chr1	27841779	27843084	1306	0.100041
chr1	27844381	27844516	136	0.0570267
chr1	27844966	27845004	39	0.0582018
chr1	27845322	27845950	629	0.0671452
chr1	27853630	27854028	399	0.133489
chr1	27865094	27865926	833	0.108815
chr1	27866561	27872764	6204	0.0779895
chr1	27873229	27873798	570	0.0718588
chr1	27879187	27879775	589	0.0792828
chr1	27886316	27887404	1089	0.0885626
chr1	27895943	27897027	1085	0.14952
chr1	27899474	27900156	683	0.0648443
chr1	27901411	27901549	139	0.104567
chr1	27902802	27904530	1729	0.0995838
chr1	27906862	27908726	1865	0.0654466
chr1	27909045	27910273	1229	0.114482
chr1	27911158	27913948	2791	0.0876689
chr1	27914324	27916108	1785	0.0767663
chr1	27923325	27925313	1989	0.084896
chr1	27938174	27938750	577	0.0767696
chr1	27943090	27944022	933	0.0675091
chr1	27944339	27946555	2217	0.0794144
chr1	27950131	27952189	2059	0.0746489
chr1	27953152	27953576	425	0.0607725
chr1	27953930	27954039	110	0.0770023
chr1	27954637	27955443	807	0.0967623
chr1	27956586	27958551	1966	0.0690587
chr1	27962021	27962632	612	0.0953683
chr1	27963113	27964136	1024	0.118999
chr1	27964516	27964981	466	0.102021
chr1	27966443	27966723	281	0.0725445
chr1	27971541	27972266	726	0.0961132
chr1	27978062	27978770	709	0.068635
chr1	27981724	27982193	470	0.0772958
chr1	27985167	27986111	945	0.138595
chr1	27996467	27996639	173	0.0791761
chr1	28039060	28039216	157	0.0517864
chr1	28055972	28056006	35	0.0996778
chr1	28069874	28069900	27	0.058386
chr1	28089882	28090153	272	0.0765896
chr1	28103601	28104384	784	0.125057
chr1	28104726	28105373	648	0.135987
chr1	28106998	28107532	535	0.0784721
chr1	28108735	28108916	182	0.0561983
chr1	28109808	28110678	871	0.0910712
chr1	28168549	28168848	300	0.0726358
chr1	28194803	28195433	631	0.075971
chr1	28199830	28200702	873	0.126285
chr1	28210251	28211294	1044	0.0640256
chr1	28241510	28241922	413	0.127733
chr1	28261605	28262688	1084	0.0826039
chr1	28267745	28269361	1617	0.0790591
chr1	28275584	28276306	723	0.0635453
chr1	28295319	28295715	397	0.0767151
chr1	28381167	28381340	174	0.101107
chr1	28395871	28395965	95	0.155952
chr1	28405774	28405838	65	0.0669205
chr1	28406538	28407063	526	0.0751428
chr1	28443778	28444525	748	0.0569263
chr1	28449917	28450926	1010	0.0746041
chr1	28454500	28455007	508	0.081421
chr1	28469706	28470456	751	0.0883498
chr1	28481572	28482498	927	0.0806856
chr1	28484432	28484948	517	0.0951415
chr1	28485421	28485531	111	0.10706
chr1	28488629	28489074	446	0.0794929
chr1	28509950	28510533	584	0.050291
chr1	28523393	28525220	1828	0.0897346
chr1	28551068	28551530	463	0.0631193
chr1	28551985	28552494	510	0.0609329
chr1	28588581	28588919	339	0.0923898
chr1	28595666	28595750	85	0.0644487
chr1	28599697	28599974	278	0.0537182
chr1	28641699	28641987	289	0.0653055
chr1	28699658	28699749	92	0.0668321
chr1	28704096	28704446	351	0.0703884
chr1	28721718	28721941	224	0.0902783
chr1	28764523	28764870	348	0.0746431
chr1	28834267	28834585	319	0.0737267
chr1	28835040	28835201	162	0.064558
chr1	28835839	28837350	1512	0.0997652
chr1	28839576	28839769	194	0.152469
chr1	28882095	28882701	607	0.0706324
chr1	28886598	28887079	482	0.077971
chr1	28887522	28888023	502	0.0817803
chr1	28896530	28897692	1163	0.0820544
chr1	28906210	28907115	906	0.132213
chr1	28916275	28917263	989	0.0702144
chr1	28961119	28961207	89	0.0683312
chr1	28961720	28962112	393	0.152646
chr1	28965563	28965582	20	0.0561694
chr1	28997119	28997910	792	0.0671758
chr1	29067505	29068097	593	0.0815866
chr1	29068706	29069064	359	0.0790822
chr1	29072718	29073331	614	0.150913
chr1	29074176	29074913	738	0.113951
chr1	29076906	29077332	427	0.148369
chr1	29079984	29080777	794	0.0983742
chr1	29087079	29087797	719	0.0674525
chr1	29103509	29103916	408	0.0591968
chr1	29120442	29121090	649	0.0709552
chr1	29218800	29219099	300	0.071906
chr1	29219632	29220644	1013	0.0809644
chr1	29254660	29255107	448	0.0775087
chr1	29284817	29285760	944	0.0847212
chr1	29286473	29286714	242	0.0725828
chr1	29302164	29302502	339	0.0743927
chr1	29303054	29303296	243	0.0640925
chr1	29308866	29309200	335	0.0588367
chr1	29352353	29353112	760	0.0745735
chr1	29446767	29447768	1002	0.070128
chr1	29458418	29459236	819	0.0773631
chr1	29461228	29462609	1382	0.078164
chr1	29472133	29472990	858	0.0872295
chr1	29509086	29509347	262	0.0893423
chr1	29537687	29539378	1692	0.0669284
chr1	29566608	29566899	292	0.0700278
chr1	29568796	29569408	613	0.0637139
chr1	29570871	29572880	2010	0.0671506
chr1	29575161	29576621	1461	0.0609528
chr1	29577084	29577432	349	0.0646891
chr1	29613479	29613620	142	0.0759157
chr1	29617495	29619096	1602	0.0559981
chr1	29626805	29627846	1042	0.0551548
chr1	29658769	29659181	413	0.0571554
chr1	29692352	29694046	1695	0.0568996
chr1	29794890	29795055	166	0.0506081
chr1	29803315	29803432	118	0.0813618
chr1	30073998	30074159	162	0.0583917
chr1	30160194	30162124	1931	0.0688072
chr1	30175084	30176022	939	0.0686351
chr1	30346721	30346873	153	0.0729279
chr1	30376308	30376680	373	0.0642202
chr1	30483026	30483518	493	0.0521841
chr1	30580911	30582079	1169	0.0858907
chr1	30585268	30587064	1797	0.0709686
chr1	30596483	30597884	1402	0.063839
chr1	30607938	30609306	1369	0.105579
chr1	30652006	30653295	1290	0.0615622
chr1	30718286	30718302	17	0.0511854
chr1	30720307	30720743	437	0.0532474
chr1	30730800	30731521	722	0.0711021
chr1	30880184	30880602	419	0.0558327
chr1	30983683	30984447	765	0.0600558
chr1	30988784	30988943	160	0.0562936
chr1	30998823	30999687	865	0.0567041
chr1	31160154	31162943	2790	0.0685257
chr1	31167078	31167129	52	0.0547611
chr1	31167732	31167843	112	0.055931
chr1	31201668	31202675	1008	0.0716594
chr1	31214238	31216228	1991	0.0828698
chr1	31219695	31220786	1092	0.0620687
chr1	31223215	31225928	2714	0.0784466
chr1	31226256	31227255	1000	0.0742368
chr1	31276122	31276807	686	0.081861
chr1	31290180	31290555	376	0.0978205
chr1	31292043	31293026	984	0.0670427
chr1	31313378	31314892	1515	0.0994335
chr1	31315193	31315621	429	0.072276
chr1	31317006	31318326	1321	0.0926675
chr1	31325048	31326406	1359	0.09552
chr1	31330577	31331104	528	0.0798486
chr1	31331476	31331841	366	0.080201
chr1	31344952	31345273	322	0.0572158
chr1	31345583	31346742	1160	0.0662804
chr1	31355767	31357170	1404	0.0817448
chr1	31365463	31367085	1623	0.0619823
chr1	31367386	31368489	1104	0.0866846
chr1	31368843	31369212	370	0.0883819
chr1	31370192	31371964	1773	0.0673733
chr1	31372463	31373176	714	0.126429
chr1	31373483	31376536	3054	0.0956938
chr1	31378803	31380555	1753	0.10972
chr1	31383541	31387149	3609	0.0687245
chr1	31391669	31393178	1510	0.107633
chr1	31401613	31404063	2451	0.094486
chr1	31412210	31412254	45	0.0982721
chr1	31442504	31442516	13	0.0547158
chr1	31457367	31457938	572	0.0789422
chr1	31473482	31473755	274	0.0741768
chr1	31483088	31483862	775	0.0711605
chr1	31491229	31491274	46	0.0867594
chr1	31495397	31495768	372	0.0700794
chr1	31512430	31513100	671	0.127744
chr1	31513420	31513920	501	0.135047
chr1	31515642	31516211	570	0.0755451
chr1	31523750	31524662	913	0.100781
chr1	31527228	31527345	118	0.0684343
chr1	31531219	31531503	285	0.105609
chr1	31535885	31536011	127	0.10614
chr1	31547583	31547642	60	0.0641332
chr1	31548815	31548962	148	0.0711603
chr1	31582453	31582599	147	0.150211
chr1	31583284	31583604	321	0.0645228
chr1	31613890	31614027	138	0.0537799
chr1	31627054	31627614	561	0.122171
chr1	31664914	31665238	325	0.0584054
chr1	31707616	31708327	712	0.053372
chr1	31716090	31717458	1369	0.0625543
chr1	31743754	31744333	580	0.0794653
chr1	31747108	31747558	451	0.106714
chr1	31747978	31748202	225	0.084062
chr1	31772955	31773354	400	0.128531
chr1	31774689	31775653	965	0.0646403
chr1	31792314	31792524	211	0.0646428
chr1	31841646	31842692	1047	0.0703891
chr1	31843793	31844759	967	0.0796151
chr1	31846873	31847908	1036	0.107511
chr1	31887447	31887954	508	0.0980648
chr1	31888818	31889487	670	0.116586
chr1	31895716	31896392	677	0.0683178
chr1	31908060	31908569	510	0.0542134
chr1	32038374	32041389	3016	0.100477
chr1	32056388	32056825	438	0.0838707
chr1	32057245	32057686	442	0.110392
chr1	32058514	32058573	60	0.0646834
chr1	32089781	32091223	1443	0.0592331
chr1	32100787	32101945	1159	0.0624124
chr1	32102477	32102615	139	0.084949
chr1	32103104	32103151	48	0.100488
chr1	32103569	32104448	880	0.11535
chr1	32104830	32105572	743	0.0796
[truncated: 87,439 more rows]

## Sheet: Table S6
Supplemental Table S6. List of identified 5hmC regions in lung tumor
chr	start	end	width	5hmC level
chr1	948265	948340	76	0.104886
chr1	1206095	1206834	740	0.0955111
chr1	1504845	1505201	357	0.0830291
chr1	1767271	1767713	443	0.0795244
chr1	1803030	1803543	514	0.0892571
chr1	1809595	1809690	96	0.0967406
chr1	2121601	2121906	306	0.0953855
chr1	2168648	2169439	792	0.0921502
chr1	2171773	2172332	560	0.112412
chr1	2287077	2287217	141	0.0877141
chr1	6689610	6689781	172	0.0785969
chr1	6922284	6922442	159	0.0876667
chr1	7010581	7010969	389	0.0827919
chr1	8079382	8079491	110	0.103078
chr1	8138213	8138619	407	0.104603
chr1	8577901	8578712	812	0.103
chr1	8732050	8732601	552	0.113918
chr1	8883454	8883941	488	0.118837
chr1	8919275	8919955	681	0.112737
chr1	9067883	9068228	346	0.100065
chr1	9360677	9361136	460	0.0928146
chr1	9942300	9942555	256	0.0959454
chr1	11828536	11829444	909	0.117007
chr1	11913707	11913933	227	0.109945
chr1	12100098	12101182	1085	0.0980344
chr1	12761116	12761749	634	0.102176
chr1	15631172	15631501	330	0.09647
chr1	16300812	16301034	223	0.113905
chr1	18953597	18953638	42	0.0937264
chr1	19534479	19534521	43	0.124906
chr1	21886230	21886582	353	0.0845235
chr1	21996707	21996951	245	0.100784
chr1	23855690	23856401	712	0.11014
chr1	24302860	24304155	1296	0.113683
chr1	24516879	24517130	252	0.100994
chr1	24517507	24518285	779	0.10801
chr1	24559790	24560925	1136	0.113298
chr1	24698882	24699543	662	0.11608
chr1	25252864	25254067	1204	0.0873631
chr1	26216140	26216727	588	0.107109
chr1	26797053	26797585	533	0.103273
chr1	27477873	27478146	274	0.113151
chr1	27478539	27479312	774	0.138016
chr1	27839829	27840125	297	0.0865401
chr1	29556520	29556681	162	0.123057
chr1	31018245	31018517	273	0.0828678
chr1	31019001	31019320	320	0.0811308
chr1	31510532	31510786	255	0.100654
chr1	32395621	32395677	57	0.124168
chr1	33221235	33222212	978	0.0922899
chr1	38395423	38395878	456	0.103972
chr1	38774429	38774867	439	0.0855973
chr1	39247698	39248622	925	0.112788
chr1	39337373	39338068	696	0.187327
chr1	39463114	39463699	586	0.094763
chr1	39726066	39726325	260	0.114663
chr1	40510702	40511011	310	0.11407
chr1	40512467	40512738	272	0.0991704
chr1	40513222	40513395	174	0.0965637
chr1	42328511	42328795	285	0.096796
chr1	42345931	42347427	1497	0.091521
chr1	43731702	43732542	841	0.0958574
chr1	43733128	43733526	399	0.100802
chr1	43856473	43856751	279	0.101546
chr1	45673094	45673183	90	0.145411
chr1	46797676	46797756	81	0.108666
chr1	47693813	47694124	312	0.0916615
chr1	52310072	52310189	118	0.0880524
chr1	54520181	54520647	467	0.10991
chr1	59472756	59474659	1904	0.085841
chr1	59964222	59964555	334	0.0905905
chr1	59965019	59965225	207	0.0991375
chr1	59965688	59966003	316	0.103975
chr1	60139640	60140007	368	0.0890958
chr1	60140450	60140835	386	0.0978858
chr1	64263900	64264186	287	0.0952319
chr1	64647884	64648240	357	0.102033
chr1	64648695	64648775	81	0.0960744
chr1	68189397	68190096	700	0.0965991
chr1	68204154	68204330	177	0.0942313
chr1	78958825	78959186	362	0.0853116
chr1	85597817	85598297	481	0.121859
chr1	89890995	89891313	319	0.10909
chr1	90184627	90185533	907	0.126449
chr1	90425212	90425332	121	0.0814537
chr1	90457309	90457601	293	0.0900205
chr1	91298676	91299285	610	0.10432
chr1	92765442	92765681	240	0.113582
chr1	93304902	93305218	317	0.0926303
chr1	93441111	93441390	280	0.0966029
chr1	93442022	93442062	41	0.129902
chr1	94240732	94241009	278	0.0953842
chr1	94790927	94791275	349	0.089706
chr1	95188641	95190117	1477	0.0888787
chr1	97086792	97087477	686	0.130161
chr1	109832202	109832339	138	0.0898719
chr1	111733668	111734553	886	0.092684
chr1	111758475	111759735	1261	0.0908559
chr1	115024634	115025422	789	0.0925107
chr1	117280833	117281576	744	0.0941897
chr1	117421968	117422439	472	0.104054
chr1	118202277	118202691	415	0.102041
chr1	119447836	119448062	227	0.0983647
chr1	145440095	145441040	946	0.0972552
chr1	147228261	147229052	792	0.105412
chr1	147234781	147234951	171	0.0883955
chr1	150321882	150322000	119	0.116122
chr1	150743024	150743247	224	0.120548
chr1	150899663	150899839	177	0.0959266
chr1	153853192	153853550	359	0.106513
chr1	153877442	153877711	270	0.100724
chr1	153919580	153920018	439	0.141344
chr1	154147350	154147976	627	0.121205
chr1	154578504	154579113	610	0.11572
chr1	154926851	154927230	380	0.140052
chr1	154977592	154977704	113	0.0987323
chr1	155111022	155111635	614	0.122532
chr1	155530156	155530423	268	0.129395
chr1	156077468	156078542	1075	0.0858501
chr1	156306085	156306395	311	0.0899176
chr1	156473423	156474179	757	0.164718
chr1	160261151	160261228	78	0.0817541
chr1	161100886	161101411	526	0.134268
chr1	162145706	162145727	22	0.0893289
chr1	162299540	162299964	425	0.0852393
chr1	164685725	164686303	579	0.0831981
chr1	167878719	167879932	1214	0.106744
chr1	169452505	169453025	521	0.145733
chr1	169865413	169866449	1037	0.0939576
chr1	169975879	169976142	264	0.089931
chr1	171641939	171641954	16	0.0823704
chr1	175749832	175750104	273	0.0998173
chr1	181073081	181073483	403	0.0946537
chr1	181396308	181396487	180	0.0914367
chr1	182199063	182199169	107	0.0949111
chr1	182583219	182583572	354	0.105431
chr1	182817350	182817621	272	0.0845493
chr1	185128163	185128490	328	0.1055
chr1	196992028	196992420	393	0.0864727
chr1	198170300	198171940	1641	0.0999905
chr1	198252356	198252649	294	0.101947
chr1	200263724	200264271	548	0.0858281
chr1	200748213	200748711	499	0.0982039
chr1	201643875	201645023	1149	0.0988845
chr1	201808327	201808533	207	0.100647
chr1	201857151	201857457	307	0.130923
chr1	201872989	201873667	679	0.0819585
chr1	202786711	202786847	137	0.0854973
chr1	202806144	202806672	529	0.085671
chr1	203464372	203464899	528	0.0812304
chr1	203577157	203578213	1057	0.0953099
chr1	203606106	203606297	192	0.0941439
chr1	205094573	205094845	273	0.0862196
chr1	205267058	205267217	160	0.0924971
chr1	205276024	205276938	915	0.0885957
chr1	205284726	205285899	1174	0.107032
chr1	206866063	206866220	158	0.083022
chr1	206875893	206877945	2053	0.115425
chr1	207497795	207498344	550	0.120303
chr1	207979949	207980196	248	0.0864795
chr1	207989689	207989893	205	0.0891696
chr1	208000978	208001913	936	0.102102
chr1	208037362	208037833	472	0.10278
chr1	208038365	208038919	555	0.110331
chr1	208077643	208077758	116	0.0851684
chr1	210464748	210465068	321	0.107531
chr1	211803329	211804034	706	0.101073
chr1	211869618	211869824	207	0.0863116
chr1	211995820	211995844	25	0.130722
chr1	212690149	212690935	787	0.101737
chr1	214341104	214341296	193	0.0980938
chr1	214341644	214341809	166	0.0852833
chr1	214476556	214476916	361	0.0971061
chr1	219966052	219966278	227	0.0862885
chr1	220961558	220961858	301	0.128685
chr1	221913498	221913841	344	0.0863647
chr1	224012613	224012659	47	0.0838992
chr1	224013118	224013248	131	0.104127
chr1	224013603	224013750	148	0.0910948
chr1	224518749	224518932	184	0.118197
chr1	224973129	224974001	873	0.0921356
chr1	225767941	225768357	417	0.100948
chr1	226138868	226139221	354	0.093003
chr1	226841316	226842708	1393	0.107322
chr1	226905449	226905510	62	0.0829163
chr1	228273617	228275035	1419	0.11122
chr1	228560534	228561157	624	0.112281
chr1	228771348	228771416	69	0.159298
chr1	228820236	228820783	548	0.0860996
chr1	228876480	228877024	545	0.0838408
chr1	230276786	230277132	347	0.0991836
chr1	230354871	230355438	568	0.084456
chr1	232714530	232714982	453	0.0987972
chr1	234624106	234624397	292	0.0857585
chr1	234624777	234624987	211	0.0807002
chr1	235001104	235001261	158	0.128755
chr1	235242220	235242751	532	0.104245
chr1	235286524	235287656	1133	0.0923349
chr1	236506240	236507239	1000	0.0998581
chr1	237581633	237581724	92	0.129533
chr1	244894363	244894498	136	0.093247
chr1	245651381	245652156	776	0.0895712
chr1	246732813	246733119	307	0.0934649
chr10	646904	646996	93	0.124049
chr10	658548	658943	396	0.131684
chr10	689489	689619	131	0.0965586
chr10	1340497	1340859	363	0.0850716
chr10	1410515	1411319	805	0.11254
chr10	3464096	3464280	185	0.122694
chr10	3803184	3803827	644	0.147229
chr10	3804207	3804605	399	0.106305
chr10	3871954	3872066	113	0.160302
chr10	3936508	3937186	679	0.116705
chr10	4055797	4056381	585	0.117454
chr10	4541961	4542057	97	0.0846329
chr10	6246843	6247007	165	0.0846877
chr10	6315891	6316717	827	0.159204
chr10	6924637	6925374	738	0.0952005
chr10	9151879	9151939	61	0.0934807
chr10	9375581	9376146	566	0.114786
chr10	9802308	9803160	853	0.118253
chr10	9803781	9804046	266	0.121056
chr10	11871255	11871664	410	0.0974844
chr10	13149778	13149808	31	0.0986233
chr10	13553520	13553989	470	0.0970164
chr10	13815170	13816774	1605	0.112182
chr10	15801776	15801974	199	0.0888304
chr10	22973573	22973921	349	0.0913642
chr10	23615614	23615764	151	0.136233
chr10	24609628	24610265	638	0.0970498
chr10	26531194	26531670	477	0.0989804
chr10	27969970	27970113	144	0.0874294
chr10	29888124	29888221	98	0.133058
chr10	29888707	29888798	92	0.109804
chr10	29937410	29937896	487	0.093053
chr10	30323810	30324330	521	0.0964723
chr10	30354430	30355051	622	0.0926591
chr10	30636434	30636962	529	0.127768
chr10	30734196	30735201	1006	0.137653
chr10	30993107	30993403	297	0.122458
chr10	32627048	32627605	558	0.098195
chr10	33232515	33233453	939	0.110193
chr10	34390568	34390901	334	0.0979767
chr10	34391226	34391668	443	0.103391
chr10	43637006	43637359	354	0.0962412
chr10	44866461	44866818	358	0.0863506
chr10	46088951	46089065	115	0.114239
chr10	49840816	49841057	242	0.0993871
chr10	51574776	51575863	1088	0.131993
chr10	52224231	52224747	517	0.101359
chr10	52271425	52272624	1200	0.099134
chr10	63597555	63598500	946	0.121284
chr10	63775761	63775968	208	0.0901916
chr10	63776870	63777210	341	0.0996859
chr10	64321721	64321957	237	0.0884834
chr10	64375351	64375643	293	0.10488
chr10	64488044	64488389	346	0.0902653
chr10	69610553	69610569	17	0.099819
chr10	70354457	70354463	7	0.0838316
chr10	71082162	71082641	480	0.0958244
chr10	71085869	71086116	248	0.0962387
chr10	71483947	71484234	288	0.0886605
chr10	71574764	71575233	470	0.110693
chr10	71578628	71579255	628	0.120925
chr10	72114460	72115662	1203	0.102637
chr10	72433104	72433497	394	0.107711
chr10	72474033	72474442	410	0.1186
chr10	72636145	72636495	351	0.0926731
chr10	72978645	72978946	302	0.0943296
chr10	74879440	74879835	396	0.104463
chr10	75799266	75800163	898	0.111697
chr10	75905868	75906173	306	0.106342
chr10	77660052	77660764	713	0.114715
chr10	78110299	78110656	358	0.0941576
chr10	79217662	79217844	183	0.0849063
chr10	79404763	79405132	370	0.0861287
chr10	80654812	80655550	739	0.0989719
chr10	81108381	81108652	272	0.0914251
chr10	81960698	81961962	1265	0.126504
chr10	82217814	82218521	708	0.0970026
chr10	91093573	91094275	703	0.155569
chr10	91964176	91964598	423	0.105745
chr10	92200454	92200795	342	0.0876761
chr10	93445929	93446318	390	0.106296
chr10	95123227	95124267	1041	0.114589
chr10	96533881	96534263	383	0.102246
chr10	99193320	99193547	228	0.103627
chr10	101736221	101736411	191	0.119956
chr10	102426119	102426432	314	0.108287
chr10	102810503	102811317	815	0.118741
chr10	103348972	103349097	126	0.0918477
chr10	103573720	103574626	907	0.12632
chr10	104192971	104193594	624	0.153772
chr10	104941444	104941753	310	0.111415
chr10	105604009	105604418	410	0.099008
chr10	105612019	105613129	1111	0.134048
chr10	105812629	105812974	346	0.0850522
chr10	106062305	106062754	450	0.108401
chr10	109754838	109755236	399	0.0911861
chr10	110799111	110799398	288	0.103488
chr10	111644393	111644643	251	0.0901738
chr10	111765097	111765113	17	0.116307
chr10	111772576	111772838	263	0.103276
chr10	111773423	111773988	566	0.0948625
chr10	112285265	112285507	243	0.0893434
chr10	112318690	112319021	332	0.0956226
chr10	114138451	114138888	438	0.118328
chr10	115760483	115760626	144	0.0926159
chr10	116591014	116591224	211	0.14926
chr10	120457945	120458166	222	0.103617
chr10	124739050	124739466	417	0.142334
chr10	125353596	125353858	263	0.100595
chr10	125828485	125829346	862	0.102465
chr10	126387132	126387391	260	0.0898635
chr10	128892417	128893911	1495	0.0924508
chr10	129142117	129143306	1190	0.125838
chr10	129707390	129708292	903	0.0989186
chr10	129886318	129886461	144	0.0884032
chr10	130737544	130737972	429	0.0885992
chr10	130844553	130845316	764	0.124834
chr10	131224146	131224534	389	0.106341
chr10	131818442	131818609	168	0.0935047
chr10	132932395	132933735	1341	0.0995989
chr10	134893377	134893495	119	0.0978479
chr11	1325635	1325784	150	0.0809921
chr11	1346830	1348174	1345	0.0933129
chr11	1961893	1961940	48	0.120024
chr11	2208379	2208668	290	0.115031
chr11	6632433	6632529	97	0.0840823
chr11	6870762	6870784	23	0.105203
chr11	8124894	8125199	306	0.0878964
chr11	9599318	9599530	213	0.129786
chr11	12163683	12164001	319	0.0821403
chr11	12164373	12164751	379	0.0855594
chr11	12458983	12459793	811	0.098963
chr11	14927684	14928089	406	0.104944
chr11	20805761	20806039	279	0.0973897
chr11	33550738	33551281	544	0.108661
chr11	33551662	33551678	17	0.101741
chr11	33655983	33656514	532	0.087224
chr11	33656827	33657143	317	0.0923205
chr11	35169625	35169701	77	0.104424
chr11	36794356	36794910	555	0.0942639
chr11	44594934	44595855	922	0.117675
chr11	44798227	44798289	63	0.0854001
chr11	47415805	47416229	425	0.116318
chr11	47737361	47737399	39	0.140601
chr11	47936028	47936580	553	0.124878
chr11	48033929	48034053	125	0.0873343
chr11	56407435	56407751	317	0.0975026
chr11	57019139	57019949	811	0.0845397
chr11	59836817	59837091	275	0.121872
chr11	59837806	59838055	250	0.0894917
chr11	59986063	59986086	24	0.156578
chr11	60859887	60861045	1159	0.0898787
chr11	60917828	60918376	549	0.0858256
chr11	62500079	62500130	52	0.0820094
chr11	63426452	63426604	153	0.0934089
chr11	63426914	63427172	259	0.101415
chr11	63582646	63582890	245	0.0820851
chr11	64017619	64018128	510	0.112298
chr11	64497450	64497802	353	0.0849861
chr11	64620490	64620963	474	0.126416
chr11	64631851	64633214	1364	0.103268
chr11	66076633	66077058	426	0.0924533
chr11	67001323	67001525	203	0.120691
chr11	67072688	67072982	295	0.0909083
chr11	67138339	67139216	878	0.0857204
chr11	67788438	67788851	414	0.0875236
chr11	67799094	67799265	172	0.126376
chr11	67916349	67916604	256	0.103524
chr11	67974403	67974675	273	0.133994
chr11	68079620	68079681	62	0.115482
chr11	68105086	68105658	573	0.100556
chr11	69557987	69558211	225	0.0845521
chr11	71949149	71950067	919	0.0924153
chr11	72463983	72464203	221	0.121012
chr11	72489979	72490871	893	0.0986371
chr11	72899720	72899843	124	0.0782165
chr11	73090641	73090958	318	0.0971296
chr11	75091205	75091739	535	0.100729
chr11	76664072	76664395	324	0.0952163
chr11	79651410	79651762	353	0.0999999
chr11	79652632	79653335	704	0.128748
chr11	79859281	79859366	86	0.110435
chr11	81488492	81488790	299	0.106809
chr11	82719087	82719274	188	0.094789
chr11	82719719	82720026	308	0.0905884
chr11	86057503	86057947	445	0.0869676
chr11	86667906	86668247	342	0.195439
chr11	93805141	93805601	461	0.087554
chr11	94283502	94283990	489	0.111358
chr11	94893727	94893843	117	0.0879176
chr11	95987875	95988124	250	0.113095
chr11	102158073	102158780	708	0.12607
chr11	102237948	102238196	249	0.0995758
chr11	102272692	102272840	149	0.14233
chr11	106261808	106262364	557	0.0930273
chr11	108091322	108091646	325	0.135654
chr11	111315695	111316921	1227	0.0852298
chr11	111565742	111565785	44	0.0828713
chr11	111849180	111849421	242	0.093901
chr11	113957624	113958706	1083	0.0819256
chr11	118190390	118190859	470	0.118952
chr11	118766805	118767238	434	0.104095
chr11	118926255	118926843	589	0.105606
chr11	118966760	118967111	352	0.121941
chr11	120223399	120223626	228	0.111611
chr11	121289397	121290107	711	0.0861712
chr11	122128414	122128932	519	0.109535
chr11	122864656	122864901	246	0.110031
chr11	122929189	122929377	189	0.10114
chr11	122987416	122987825	410	0.118396
chr11	123402256	123402364	109	0.0822534
chr11	123402724	123403093	370	0.0849971
chr11	124622413	124622873	461	0.133818
chr11	130187847	130188068	222	0.120424
chr11	134514329	134514757	429	0.0880363
chr12	1725901	1726161	261	0.098159
chr12	5901411	5901545	135	0.0885022
chr12	6595430	6596136	707	0.115428
chr12	7502207	7502245	39	0.0933108
chr12	8231169	8231513	345	0.149231
chr12	8729763	8730515	753	0.107401
chr12	11830042	11831987	1946	0.09611
chr12	13939426	13939778	353	0.0859545
chr12	14344528	14344925	398	0.113232
chr12	17972301	17972436	136	0.121788
chr12	18758783	18759058	276	0.091114
chr12	25609275	25609718	444	0.135188
chr12	25611175	25611401	227	0.106474
chr12	25994845	25995589	745	0.0886053
chr12	27404935	27405610	676	0.0906159
chr12	28124208	28124548	341	0.0931851
chr12	29306187	29307135	949	0.122527
chr12	29872503	29873095	593	0.0929054
chr12	30495686	30496235	550	0.11413
chr12	30906289	30906402	114	0.114558
chr12	32720242	32720777	536	0.109419
chr12	45182588	45182649	62	0.0993744
chr12	46007305	46007647	343	0.106928
chr12	46780931	46781908	978	0.111894
chr12	47472243	47472513	271	0.107967
chr12	47785223	47785869	647	0.0996712
chr12	48100805	48100969	165	0.147004
chr12	48208545	48208773	229	0.111806
chr12	48221944	48223667	1724	0.113752
chr12	50138691	50139273	583	0.0963224
chr12	52279913	52280083	171	0.10001
chr12	52295739	52295836	98	0.0955245
chr12	53265595	53266259	665	0.100119
chr12	53359004	53359267	264	0.0927407
chr12	56372840	56373114	275	0.0991087
chr12	56882535	56882701	167	0.110654
chr12	57144404	57144839	436	0.14101
chr12	65949814	65950207	394	0.227627
chr12	66591899	66592839	941	0.132075
chr12	66628532	66628749	218	0.0997247
chr12	68574283	68574449	167	0.0853174
chr12	68787302	68787593	292	0.0951606
chr12	69636933	69637053	121	0.0854366
chr12	69980119	69980175	57	0.118172
chr12	75038273	75038515	243	0.125088
chr12	89048462	89048741	280	0.0985483
chr12	89410399	89410531	133	0.0996754
chr12	89411025	89411315	291	0.118943
chr12	89586495	89586880	386	0.0972019
chr12	91507530	91507691	162	0.0922139
chr12	91555465	91555683	219	0.107745
chr12	92305418	92305722	305	0.0929845
chr12	92554465	92554643	179	0.101718
chr12	93632151	93632410	260	0.0881045
chr12	93776483	93776833	351	0.122695
chr12	96585816	96586239	424	0.102093
chr12	96592098	96592359	262	0.175161
chr12	98858710	98858819	110	0.10088
chr12	101890504	101890861	358	0.0986897
chr12	104880351	104880941	591	0.118856
chr12	104881249	104881286	38	0.131181
chr12	105746763	105747339	577	0.0970296
chr12	106454839	106456003	1165	0.0966371
chr12	106522899	106523306	408	0.0890491
chr12	106534406	106534774	369	0.105552
chr12	109225941	109226268	328	0.0893931
chr12	110479335	110481386	2052	0.110633
chr12	111850935	111851797	863	0.104049
chr12	111998754	111999569	816	0.0945982
chr12	112194897	112195201	305	0.0852851
chr12	112208997	112209266	270	0.111824
chr12	112565673	112566006	334	0.0924341
chr12	113760473	113760816	344	0.154025
chr12	114422254	114422692	439	0.0879578
chr12	115113175	115113298	124	0.0909382
chr12	117500322	117501485	1164	0.0968252
chr12	120444717	120444804	88	0.124062
chr12	120680918	120681348	431	0.0957872
chr12	120978097	120978473	377	0.10984
chr12	120989755	120990774	1020	0.128686
chr12	121324913	121325235	323	0.0897626
chr12	121342609	121342630	22	0.108163
chr12	121752391	121752719	329	0.094174
chr12	122110910	122111631	722	0.130726
chr12	122235124	122236038	915	0.10809
chr12	122853588	122854134	547	0.0849786
chr12	124578276	124579034	759	0.0979227
chr12	125034723	125035140	418	0.0834193
chr12	125138652	125138705	54	0.0896127
chr12	125220710	125221096	387	0.0992192
chr12	130616062	130616305	244	0.0918214
chr12	131318944	131319019	76	0.08717
chr12	131322634	131322826	193	0.0955305
chr12	132567294	132567772	479	0.113245
chr12	132617518	132617754	237	0.0877623
chr12	133070744	133071446	703	0.0981879
chr12	133336048	133336447	400	0.114737
chr13	20166073	20166123	51	0.10339
chr13	21466128	21466288	161	0.111106
chr13	22031074	22031146	73	0.143632
chr13	22780562	22781030	469	0.0938328
chr13	23968187	23968257	71	0.0906229
chr13	24828826	24829594	769	0.113428
chr13	26422890	26423459	570	0.102923
chr13	29281937	29282149	213	0.115712
chr13	29517384	29517898	515	0.0920817
chr13	30131002	30131077	76	0.094531
chr13	30131383	30131748	366	0.108822
chr13	32371592	32372226	635	0.104952
chr13	33711521	33712037	517	0.126002
chr13	33916179	33916816	638	0.0974014
chr13	41139454	41139868	415	0.114888
chr13	41575719	41576207	489	0.129487
chr13	42529910	42530344	435	0.108229
chr13	43061212	43061293	82	0.128981
chr13	43966151	43966691	541	0.107618
chr13	45288386	45288708	323	0.136149
chr13	46035692	46036126	435	0.153334
chr13	47302602	47303558	957	0.110383
chr13	48734444	48734906	463	0.105401
chr13	48879360	48879526	167	0.147436
chr13	50228374	50228937	564	0.098785
chr13	51228723	51229299	577	0.100882
chr13	51993491	51993711	221	0.09987
chr13	52344163	52344689	527	0.0978096
chr13	53545013	53545166	154	0.0885369
chr13	55803904	55804202	299	0.0986885
chr13	61161627	61162182	556	0.0907428
chr13	74411488	74411527	40	0.0907194
chr13	84150337	84150685	349	0.103246
chr13	86960187	86960271	85	0.131189
chr13	93900788	93902182	1395	0.104249
chr13	94884560	94885046	487	0.109104
chr13	94885768	94885925	158	0.0962102
chr13	97765111	97765475	365	0.106293
chr13	97765891	97766119	229	0.100247
chr13	98253487	98253699	213	0.118485
chr13	98904381	98904660	280	0.105915
chr13	98905087	98905554	468	0.111383
chr13	99201496	99202769	1274	0.0947341
chr13	99610567	99610738	172	0.108229
chr13	99611731	99612180	450	0.0945769
chr13	100188540	100188895	356	0.10284
chr13	102270997	102271297	301	0.118833
chr13	107214106	107214359	254	0.0968366
chr13	107222557	107223212	656	0.125521
chr13	107427270	107428018	749	0.0906383
chr13	110324646	110324850	205	0.0929899
chr13	110605928	110606312	385	0.100726
chr13	111160452	111161324	873	0.112584
chr13	111870790	111871089	300	0.0952302
chr13	114987557	114987660	104	0.109802
chr14	20997184	20997221	38	0.108009
chr14	21431995	21432627	633	0.120532
chr14	21457383	21457502	120	0.119904
chr14	22803158	22803387	230	0.0952993
chr14	24551212	24551525	314	0.111139
chr14	24608915	24609515	601	0.11408
chr14	24707522	24707977	456	0.099882
chr14	24800930	24801084	155	0.0860971
chr14	31489193	31489691	499	0.0913909
chr14	33279884	33280227	344	0.106218
chr14	33904980	33905611	632	0.0950236
chr14	34448156	34448391	236	0.0910756
chr14	34544592	34544921	330	0.128032
chr14	34999401	34999518	118	0.0937896
chr14	36969069	36969146	78	0.0927412
chr14	37114864	37115556	693	0.12754
chr14	39645979	39646622	644	0.117441
chr14	48100656	48100739	84	0.104924
chr14	50830438	50830913	476	0.145418
chr14	51295754	51296287	534	0.197024
chr14	51430153	51430522	370	0.110272
chr14	53614534	53614752	219	0.0922474
chr14	54460844	54461174	331	0.10359
chr14	54863035	54863177	143	0.139471
chr14	55355749	55356294	546	0.0970137
chr14	55740909	55741093	185	0.142532
chr14	56567181	56567349	169	0.0944882
chr14	57463762	57464061	300	0.0874798
chr14	57626517	57626604	88	0.0861528
chr14	58577597	58577763	167	0.097072
chr14	60335741	60336236	496	0.103683
chr14	60982897	60983133	237	0.0928142
chr14	61412651	61412940	290	0.0828215
chr14	61718514	61719046	533	0.0986032
chr14	61992227	61993330	1104	0.0907767
chr14	61995199	61995691	493	0.0875837
chr14	62002866	62003950	1085	0.112276
chr14	62040310	62041415	1106	0.100804
chr14	62042008	62042456	449	0.111125
chr14	64852376	64853606	1231	0.128154
chr14	65169359	65169825	467	0.100227
chr14	65188081	65189789	1709	0.106291
chr14	67879115	67879385	271	0.165232
chr14	68139602	68139772	171	0.0996909
chr14	69042651	69043080	430	0.0847012
chr14	69043464	69043969	506	0.0843608
chr14	69252912	69254424	1513	0.126434
chr14	69288730	69289379	650	0.102304
chr14	69396646	69397300	655	0.101253
chr14	69501691	69501824	134	0.0950114
chr14	70086205	70087285	1081	0.123102
chr14	70122202	70122567	366	0.0897971
chr14	70136030	70136734	705	0.0856444
chr14	71285159	71285520	362	0.136916
chr14	71791555	71791839	285	0.0996128
chr14	73967262	73967853	592	0.102955
chr14	74218846	74219065	220	0.0843748
chr14	74352727	74352743	17	0.107965
chr14	74716268	74716715	448	0.102708
chr14	74855835	74857177	1343	0.108697
chr14	75708871	75709464	594	0.107736
chr14	75746889	75748151	1263	0.108314
chr14	75749495	75749501	7	0.0976976
chr14	75775961	75775998	38	0.0861287
chr14	75777797	75778706	910	0.11232
chr14	77053152	77053483	332	0.0835148
chr14	77239319	77240334	1016	0.121605
chr14	77310598	77310900	303	0.115276
chr14	77424489	77424565	77	0.0998109
chr14	78071948	78072661	714	0.238286
chr14	78433244	78433417	174	0.0905087
chr14	79098206	79098325	120	0.108771
chr14	79782326	79782431	106	0.0892037
chr14	79866016	79867453	1438	0.108407
chr14	79867787	79868044	258	0.099054
chr14	81321431	81321591	161	0.0909361
chr14	81321900	81322152	253	0.090714
chr14	81527242	81527687	446	0.0967567
chr14	86504431	86505178	748	0.092162
chr14	88605544	88605898	355	0.0822866
chr14	89669719	89670638	920	0.092357
chr14	89753053	89753326	274	0.0866087
chr14	89771438	89771760	323	0.0943739
chr14	90168469	90168802	334	0.172444
chr14	90187909	90188693	785	0.0947844
chr14	90379232	90379615	384	0.0889797
chr14	90577513	90578320	808	0.100434
chr14	90723631	90723801	171	0.0958671
chr14	92338479	92339109	631	0.105363
chr14	93203349	93203902	554	0.133483
chr14	93204332	93204658	327	0.120458
chr14	93652493	93652556	64	0.0936717
chr14	94420643	94421621	979	0.10361
chr14	94544132	94544356	225	0.110235
chr14	94579928	94581060	1133	0.0911833
chr14	94853850	94854789	940	0.0947552
chr14	95320030	95320564	535	0.0973157
chr14	95721143	95721500	358	0.11228
chr14	95971375	95971551	177	0.100444
chr14	99148762	99149080	319	0.0882498
chr14	99668901	99669823	923	0.0845354
chr14	99683862	99684136	275	0.10081
chr14	99990967	99991068	102	0.0917373
chr14	100597867	100598012	146	0.0828956
chr14	100624604	100624755	152	0.0892766
chr14	100806799	100807182	384	0.108515
chr14	101301587	101301858	272	0.0859784
chr14	101544551	101544726	176	0.0884706
chr14	102311516	102311784	269	0.0993945
chr14	103155356	103155561	206	0.0990208
chr14	103250839	103251288	450	0.119161
chr14	103587315	103587936	622	0.0931754
chr14	103598828	103598994	167	0.0839745
chr14	103860705	103860816	112	0.101536
chr14	103985643	103985827	185	0.0922021
chr14	104031292	104031437	146	0.0933073
chr14	104033399	104033696	298	0.105915
chr14	105142973	105143096	124	0.0892895
chr14	105233008	105233220	213	0.115068
chr14	105768829	105769264	436	0.106415
chr14	107095023	107095071	49	0.112283
chr15	22467299	22467429	131	0.0933938
chr15	27260823	27260833	11	0.13538
chr15	27742471	27742658	188	0.0930521
chr15	31616265	31617369	1105	0.0991319
chr15	31643572	31644388	817	0.0907189
chr15	33260973	33261662	690	0.0860231
chr15	34347121	34347427	307	0.104791
chr15	39505409	39506532	1124	0.0929571
chr15	42377445	42377841	397	0.0927418
chr15	43088325	43088339	15	0.0889506
chr15	45006400	45007015	616	0.115092
chr15	45007336	45007854	519	0.141876
chr15	45018762	45018905	144	0.109573
chr15	45941960	45942133	174	0.100347
chr15	46072382	46072961	580	0.0879808
chr15	48114266	48114831	566	0.0920541
chr15	51454514	51454706	193	0.0809485
chr15	56108723	56109761	1039	0.0996582
chr15	57178633	57178763	131	0.0878227
chr15	59578454	59579217	764	0.0992967
chr15	62338295	62338462	168	0.113863
chr15	63495989	63496428	440	0.11856
chr15	63772233	63773242	1010	0.0931019
chr15	63801361	63801630	270	0.104922
chr15	63822382	63822793	412	0.085153
chr15	63824532	63825106	575	0.101606
chr15	64191421	64191680	260	0.11053
chr15	64816418	64816502	85	0.1141
chr15	65129000	65129126	127	0.0966464
chr15	67097814	67097974	161	0.098311
chr15	67309034	67309922	889	0.110802
chr15	67378565	67379540	976	0.113528
chr15	67417319	67418501	1183	0.101149
chr15	68577101	68577185	85	0.114418
chr15	68852826	68852929	104	0.085283
chr15	69075031	69075208	178	0.0818004
chr15	69623418	69623646	229	0.113505
chr15	69686272	69686346	75	0.0892382
chr15	69710820	69711086	267	0.0915878
chr15	70785961	70786937	977	0.0994004
chr15	71430628	71430731	104	0.0852186
chr15	72333985	72334094	110	0.0823773
chr15	72335235	72335329	95	0.102773
chr15	72517293	72517742	450	0.0920319
chr15	72666909	72667675	767	0.13507
chr15	73978180	73978484	305	0.099828
chr15	74493830	74494241	412	0.0839219
chr15	74845184	74845699	516	0.100293
chr15	75403276	75403507	232	0.0885139
chr15	75943062	75943303	242	0.0852735
chr15	77321779	77322431	653	0.0989156
chr15	77376124	77376976	853	0.0933172
chr15	78756067	78756175	109	0.0869157
chr15	78756561	78757059	499	0.0830504
chr15	79169964	79170388	425	0.114459
chr15	81845611	81845909	299	0.115043
chr15	84099054	84099472	419	0.0974034
chr15	85143233	85143359	127	0.109338
chr15	85362745	85362883	139	0.116413
chr15	85687373	85688052	680	0.0869097
chr15	89874179	89874574	396	0.103228
chr15	90199504	90199992	489	0.105647
chr15	90643865	90644410	546	0.104446
chr15	90937755	90937853	99	0.10952
chr15	91192809	91193059	251	0.112126
chr15	93542039	93542088	50	0.080066
chr15	93611588	93611950	363	0.0885187
chr15	95217555	95218148	594	0.110925
chr15	95835860	95836156	297	0.0897792
chr15	96375175	96375401	227	0.0979486
chr15	96891026	96891318	293	0.0811026
chr15	99253069	99253662	594	0.117563
chr15	101631086	101631863	778	0.0838089
chr15	102180046	102180143	98	0.101753
chr15	102180867	102181550	684	0.108164
chr16	279857	280046	190	0.138197
chr16	1362331	1362764	434	0.0928751
chr16	1634990	1635310	321	0.108557
chr16	1875293	1875477	185	0.0836527
chr16	2478275	2478474	200	0.104772
chr16	3452747	3452757	11	0.0883635
chr16	3668755	3669058	304	0.100981
chr16	3903925	3904819	895	0.112486
chr16	4167157	4167418	262	0.107793
chr16	4412806	4412935	130	0.0901204
chr16	7980748	7981194	447	0.0911736
chr16	11458383	11458718	336	0.115104
chr16	11665294	11665631	338	0.0930275
chr16	11668938	11670052	1115	0.107237
chr16	11690861	11691339	479	0.104777
chr16	11722916	11723855	940	0.0958103
chr16	12269221	12269549	329	0.0839618
chr16	14088711	14088984	274	0.0963181
chr16	14448749	14448910	162	0.0903265
chr16	14780631	14780680	50	0.129123
chr16	16081845	16082500	656	0.10076
chr16	16083009	16083164	156	0.0886362
chr16	16261810	16262119	310	0.0932826
chr16	19726989	19727348	360	0.0976568
chr16	20877501	20878153	653	0.0958685
chr16	23516617	23516906	290	0.0935733
chr16	23539209	23539902	694	0.0857333
chr16	25993914	25994478	565	0.0823499
chr16	26292956	26293241	286	0.0885753
chr16	27278513	27279079	567	0.182073
chr16	27543919	27544094	176	0.085147
chr16	29829084	29829194	111	0.0926877
chr16	30079680	30079978	299	0.103779
chr16	30534254	30534431	178	0.0912657
chr16	30826316	30826369	54	0.102516
chr16	30894544	30895440	897	0.100408
chr16	31130500	31131316	817	0.0969284
chr16	34467347	34467467	121	0.10327
chr16	47854360	47855528	1169	0.105343
chr16	48617743	48618102	360	0.087454
chr16	49223841	49224400	560	0.0985751
chr16	57034444	57034608	165	0.0969869
chr16	57124565	57124872	308	0.0931848
chr16	57505493	57506786	1294	0.0875497
chr16	57671153	57672401	1249	0.104201
chr16	58026775	58028134	1360	0.120294
chr16	58447025	58447617	593	0.104981
chr16	63245882	63246147	266	0.151122
chr16	64623788	64624221	434	0.104735
chr16	66244371	66245046	676	0.0942664
chr16	66604412	66605045	634	0.0930564
chr16	67065285	67066252	968	0.104715
chr16	71939206	71939582	377	0.107376
chr16	72692757	72693101	345	0.0978237
chr16	72876343	72876639	297	0.107315
chr16	73376329	73376458	130	0.0907177
chr16	74614830	74614865	36	0.0962166
chr16	75004325	75005095	771	0.0946568
chr16	75061475	75062230	756	0.0992236
chr16	75301913	75302381	469	0.0856457
chr16	78428494	78429139	646	0.103049
chr16	79075802	79076545	744	0.129616
chr16	79899987	79900148	162	0.108208
chr16	79900530	79901251	722	0.0991417
chr16	81081508	81082148	641	0.102285
chr16	81136120	81136247	128	0.0943138
chr16	81668068	81668379	312	0.119795
chr16	82000855	82001060	206	0.0864457
chr16	83830599	83830799	201	0.100794
chr16	84666378	84666735	358	0.0972951
chr16	85050010	85050998	989	0.10331
chr16	85168856	85169475	620	0.117574
chr16	85270657	85271125	469	0.0939022
chr16	85402453	85402792	340	0.0942996
chr16	86614881	86615386	506	0.119837
chr16	88047009	88047049	41	0.0875381
chr16	89410007	89410384	378	0.0918833
chr17	18562	18957	396	0.0828003
chr17	497480	497649	170	0.107661
chr17	499631	500062	432	0.0924124
chr17	500364	500943	580	0.0852731
chr17	935675	935899	225	0.0813425
chr17	1013988	1014217	230	0.0820657
chr17	1080367	1081294	928	0.0884791
chr17	1509975	1510338	364	0.0904183
chr17	1655601	1655948	348	0.102118
chr17	2300911	2301169	259	0.0830154
chr17	2694962	2695049	88	0.113067
chr17	2755363	2755948	586	0.122401
chr17	4464623	4464655	33	0.0872021
chr17	5133037	5133479	443	0.0932395
chr17	7370604	7370799	196	0.0849066
chr17	7453077	7453377	301	0.103626
chr17	8599730	8599973	244	0.0941551
chr17	8698028	8698248	221	0.0834548
chr17	8829212	8829732	521	0.0847081
chr17	9320310	9320581	272	0.0877855
chr17	9374719	9375061	343	0.0774065
chr17	9634442	9635110	669	0.0901239
chr17	11189701	11190088	388	0.0802767
chr17	14736952	14737149	198	0.143153
chr17	15823664	15824405	742	0.116189
chr17	16170890	16171357	468	0.098511
chr17	16330717	16331705	989	0.0934205
chr17	17285336	17285455	120	0.109498
chr17	17310232	17310377	146	0.0831795
chr17	17310800	17311130	331	0.0972967
chr17	17739030	17739165	136	0.0886443
chr17	17930603	17931008	406	0.0891491
chr17	18820457	18821730	1274	0.117624
chr17	20075915	20076586	672	0.0892149
chr17	20205704	20206273	570	0.0804061
chr17	25798202	25799563	1362	0.11359
chr17	25806543	25806918	376	0.0828221
chr17	25830813	25831764	952	0.0877562
chr17	25891296	25891576	281	0.10501
chr17	27502803	27503102	300	0.0918811
chr17	27590980	27591106	127	0.139482
chr17	29280860	29281087	228	0.087874
chr17	29816276	29816611	336	0.106383
chr17	30645834	30645871	38	0.079413
chr17	31090665	31091628	964	0.0856498
chr17	31260696	31261414	719	0.0869393
chr17	33894024	33894262	239	0.139859
chr17	35159006	35159792	787	0.110714
chr17	35604958	35605400	443	0.0910256
chr17	35697395	35697823	429	0.0924063
chr17	37969542	37970116	575	0.0973964
chr17	38050156	38050651	496	0.0946123
chr17	38223357	38223604	248	0.0901822
chr17	38902810	38902989	180	0.0880014
chr17	39639771	39640762	992	0.0804002
chr17	40073896	40074059	164	0.0982712
chr17	40250857	40251136	280	0.0976531
chr17	40809190	40809368	179	0.110911
chr17	40825481	40825688	208	0.0815539
chr17	41045023	41045809	787	0.0968048
chr17	41527492	41527940	449	0.112643
chr17	41594550	41595422	873	0.0973403
chr17	41800691	41801560	870	0.1252
chr17	41854077	41854876	800	0.0895103
chr17	43129919	43130123	205	0.0956909
chr17	43302818	43304860	2043	0.116195
chr17	43307456	43308452	997	0.123397
chr17	43319179	43319790	612	0.113831
chr17	44266714	44267812	1099	0.107165
chr17	44272963	44273164	202	0.136539
chr17	45934681	45935036	356	0.0767213
chr17	46162250	46162422	173	0.0964784
chr17	46991941	46992114	174	0.0989671
chr17	47298819	47298966	148	0.101267
chr17	47338387	47338531	145	0.0819379
chr17	48801552	48801606	55	0.104618
chr17	48836075	48836980	906	0.0921224
chr17	51427485	51427940	456	0.0968377
chr17	51781653	51781889	237	0.0948589
chr17	55445636	55445691	56	0.0910286
chr17	57236803	57237037	235	0.101645
chr17	57547398	57547692	295	0.097963
chr17	57714894	57715095	202	0.0871374
chr17	57829100	57829715	616	0.0898725
chr17	58450346	58450553	208	0.0920009
chr17	59396124	59396530	407	0.0862128
chr17	60885994	60886079	86	0.0933937
chr17	62171961	62172182	222	0.0873768
chr17	62403771	62404204	434	0.0913644
chr17	62409046	62409584	539	0.089861
chr17	62916379	62916773	395	0.146304
chr17	63489764	63489853	90	0.1119
chr17	63590534	63591078	545	0.0835189
chr17	63915125	63916200	1076	0.0883843
chr17	65429912	65430654	743	0.0991752
chr17	66177206	66177432	227	0.117188
chr17	66461905	66462369	465	0.115743
chr17	69952185	69952623	439	0.0871216
chr17	71294087	71295052	966	0.0986753
chr17	72045245	72045648	404	0.0783867
chr17	72655811	72655936	126	0.0872449
chr17	73312484	73312744	261	0.0899687
chr17	73446852	73447163	312	0.0828752
chr17	74457946	74458639	694	0.0876661
chr17	74486387	74487414	1028	0.0942501
chr17	74490206	74490397	192	0.0769141
chr17	74495643	74496441	799	0.112311
chr17	75352168	75353091	924	0.091728
chr17	76041550	76041608	59	0.0809384
chr17	76112024	76112246	223	0.0797062
chr17	76134649	76135013	365	0.0942986
chr17	76155441	76155916	476	0.0966815
chr17	76171427	76171602	176	0.0763171
chr17	76409865	76410017	153	0.0864186
chr17	76413567	76413843	277	0.0868024
chr17	76662647	76663533	887	0.0993044
chr17	76773790	76773989	200	0.0926361
chr17	76868579	76868941	363	0.0874327
chr17	79340921	79341419	499	0.0872048
chr17	79349586	79349980	395	0.0836921
chr17	79528572	79529292	721	0.0953928
chr17	79582405	79583082	678	0.134305
chr17	80198832	80199228	397	0.0895347
chr17	80201210	80201361	152	0.0801767
chr17	80221969	80222533	565	0.08368
chr17	80282901	80283168	268	0.0787333
chr17	80314026	80314918	893	0.0863391
chr18	379659	380079	421	0.0886605
chr18	2635089	2636265	1177	0.102909
chr18	3083733	3083970	238	0.10102
chr18	7663547	7663755	209	0.0840409
chr18	8277484	8277904	421	0.09347
chr18	9754556	9755068	513	0.119379
chr18	9902548	9902604	57	0.0953345
chr18	10035101	10035631	531	0.0982603
chr18	10726194	10726338	145	0.1045
chr18	13270230	13270488	259	0.0831293
chr18	13455722	13456414	693	0.086176
chr18	13530477	13531053	577	0.092782
chr18	15198190	15198308	119	0.220721
chr18	21126341	21126353	13	0.0875008
chr18	21244577	21244717	141	0.0972724
chr18	23016390	23016737	348	0.0906652
chr18	24149454	24149888	435	0.135636
chr18	31606429	31607197	769	0.0881956
chr18	39336906	39337248	343	0.12579
chr18	39337674	39337750	77	0.134133
chr18	39694397	39694692	296	0.117639
chr18	40818015	40818563	549	0.12393
chr18	43793245	43793446	202	0.135306
chr18	45290748	45291373	626	0.0979982
chr18	45530110	45530487	378	0.0925638
chr18	46402796	46402857	62	0.112912
chr18	46452878	46453827	950	0.100671
chr18	46460273	46460391	119	0.0862351
chr18	51773187	51773395	209	0.0911913
chr18	59988760	59989045	286	0.0937332
chr18	60027926	60028152	227	0.0862664
chr18	60244073	60244949	877	0.108404
chr18	61899638	61899656	19	0.08716
chr18	66380553	66380613	61	0.133641
chr18	67626396	67627210	815	0.0980386
chr18	68815148	68815654	507	0.138744
chr18	71917724	71918162	439	0.0936583
chr18	72992491	72992587	97	0.0900349
chr18	73674375	73674657	283	0.0996074
chr18	76628250	76628730	481	0.0999709
chr18	77331063	77331446	384	0.110142
chr18	77447716	77448178	463	0.113618
chr18	77866321	77866647	327	0.0994104
chr19	489910	490121	212	0.0946653
chr19	617181	617833	653	0.114471
chr19	683962	684213	252	0.0937534
chr19	1038562	1039022	461	0.103946
chr19	1107038	1107764	727	0.0959456
chr19	1303134	1303530	397	0.106173
chr19	1411444	1412262	819	0.0962152
chr19	1860500	1860625	126	0.0880566
chr19	2036996	2037285	290	0.0862862
chr19	2247346	2247677	332	0.0944072
chr19	2562699	2562981	283	0.116259
chr19	3106960	3107599	640	0.106178
chr19	3475491	3475807	317	0.0852607
chr19	3539734	3539852	119	0.0848027
chr19	4068949	4069029	81	0.0955679
chr19	4734249	4734542	294	0.112769
chr19	4895429	4895883	455	0.0920253
chr19	4915217	4915475	259	0.122845
chr19	5076032	5076054	23	0.0947061
chr19	5635263	5636436	1174	0.128068
chr19	6433350	6433768	419	0.0883654
chr19	6668742	6669220	479	0.0898096
chr19	7186306	7186389	84	0.10445
chr19	7667771	7668035	265	0.0841146
chr19	8303650	8303723	74	0.124053
chr19	9474455	9474543	89	0.103929
chr19	10397031	10397238	208	0.0919907
chr19	10742831	10743370	540	0.103171
chr19	10776005	10776255	251	0.122787
chr19	10841586	10841946	361	0.0971809
chr19	11492912	11493069	158	0.0886802
chr19	12366565	12366582	18	0.117549
chr19	12660275	12661207	933	0.0999872
chr19	12723412	12723932	521	0.136939
chr19	13052576	13052895	320	0.107739
chr19	13094805	13094829	25	0.109981
chr19	13567466	13568232	767	0.0896934
chr19	13947162	13947262	101	0.0792725
chr19	14014721	14014794	74	0.106826
chr19	14152292	14152643	352	0.127201
chr19	14315142	14315198	57	0.163552
chr19	14527005	14527972	968	0.103171
chr19	15070573	15070673	101	0.0908758
chr19	15431463	15431782	320	0.105566
chr19	15491808	15492540	733	0.132
chr19	16180951	16180978	28	0.088131
chr19	16258226	16258746	521	0.105863
chr19	16441597	16442465	869	0.0960971
chr19	16485290	16485559	270	0.0809829
chr19	17869431	17869885	455	0.0976813
chr19	18262486	18262783	298	0.0924307
chr19	18272628	18272730	103	0.0894073
chr19	18430444	18430562	119	0.0879377
chr19	18521765	18522454	690	0.142435
chr19	18606904	18608519	1616	0.101631
chr19	18624479	18625058	580	0.180765
chr19	18908787	18908893	107	0.110626
chr19	19554417	19555974	1558	0.119205
chr19	19713903	19714503	601	0.120801
chr19	19885076	19885199	124	0.0794779
chr19	21691095	21691206	112	0.0881104
chr19	28996427	28996893	467	0.113497
chr19	30763566	30764452	887	0.12517
chr19	31846599	31846792	194	0.0875246
chr19	32465256	32465765	510	0.0936149
chr19	35588937	35589144	208	0.0823853
chr19	35707533	35707626	94	0.10452
chr19	35843323	35843419	97	0.0838752
chr19	36622101	36622982	882	0.0988412
chr19	38548725	38549083	359	0.0918684
chr19	39240528	39241157	630	0.105912
chr19	39565673	39565970	298	0.118108
chr19	39621744	39622355	612	0.110231
chr19	40048261	40048490	230	0.0964969
chr19	40647319	40648055	737	0.11098
chr19	40973773	40973842	70	0.0894946
chr19	41804695	41806556	1862	0.10366
chr19	42376656	42376736	81	0.107404
chr19	42386110	42386477	368	0.136857
chr19	44278702	44279027	326	0.0924584
chr19	44280366	44280977	612	0.130558
chr19	45221552	45222029	478	0.139579
chr19	45249581	45250163	583	0.10022
chr19	45258187	45258697	511	0.121476
chr19	46852870	46853097	228	0.0854518
chr19	47234528	47234780	253	0.0858938
chr19	47281855	47282222	368	0.0936371
chr19	47349374	47349660	287	0.086825
chr19	47440386	47440618	233	0.0952343
chr19	47850882	47851089	208	0.119884
chr19	47887928	47888098	171	0.100199
chr19	49107879	49108263	385	0.0894185
chr19	49972983	49973169	187	0.0889821
chr19	50700091	50700277	187	0.0920479
chr19	51041571	51041722	152	0.138093
chr19	51413903	51414100	198	0.0796709
chr19	52240141	52241286	1146	0.0959903
chr19	53072928	53073039	112	0.117324
chr19	54752453	54752759	307	0.114162
chr2	336294	336561	268	0.112308
chr2	610692	611407	716	0.0945468
chr2	659115	659259	145	0.0846247
chr2	1419540	1419871	332	0.0899225
chr2	1723481	1723600	120	0.090545
chr2	3203273	3203428	156	0.0853083
chr2	5517906	5518513	608	0.10652
chr2	5800585	5800636	52	0.117289
chr2	5800956	5801268	313	0.10921
chr2	7058942	7060266	1325	0.0951497
chr2	7568127	7569317	1191	0.090701
chr2	8598443	8599000	558	0.0911016
chr2	8607162	8607992	831	0.0875668
chr2	9362317	9362814	498	0.0823133
chr2	10520208	10520520	313	0.0914073
chr2	10612485	10612896	412	0.0983552
chr2	10845597	10845902	306	0.0819668
chr2	11889837	11889847	11	0.0916008
chr2	11918393	11918688	296	0.0942548
chr2	13142730	13142879	150	0.0894741
chr2	16831015	16831810	796	0.0978566
chr2	19130655	19131308	654	0.0903174
chr2	19134380	19134578	199	0.101716
chr2	19546795	19546946	152	0.0995518
chr2	20213110	20213313	204	0.08957
chr2	20531677	20531774	98	0.0901737
chr2	21230564	21231678	1115	0.0947262
chr2	24243272	24243532	261	0.0999656
chr2	25130519	25130928	410	0.0878908
chr2	25268639	25269304	666	0.117824
chr2	25735639	25736329	691	0.119979
chr2	25859329	25859418	90	0.112705
chr2	26069127	26069264	138	0.0851421
chr2	26128237	26128471	235	0.0895944
chr2	26259891	26260235	345	0.142283
chr2	26529498	26529746	249	0.0829419
chr2	27238398	27239283	886	0.0962801
chr2	27345846	27346039	194	0.143377
chr2	27349220	27349441	222	0.0873313
chr2	27630413	27630634	222	0.111633
chr2	28055903	28056145	243	0.0832193
chr2	28548886	28550173	1288	0.0945018
chr2	28998829	28999834	1006	0.100936
chr2	32560570	32560823	254	0.100712
chr2	33705389	33705410	22	0.0977185
chr2	33705954	33706267	314	0.104922
chr2	36790828	36790967	140	0.106267
chr2	37648377	37648864	488	0.0813475
chr2	37878678	37879040	363	0.141274
chr2	42317489	42317942	454	0.0960307
chr2	42395994	42396170	177	0.10514
chr2	43077654	43078226	573	0.0822362
chr2	43106515	43107142	628	0.0848737
chr2	43135975	43136533	559	0.0885416
chr2	43177917	43178528	612	0.0948056
chr2	44002543	44002857	315	0.204262
chr2	45108670	45108945	276	0.0970379
chr2	46199046	46199423	378	0.100228
chr2	46530325	46530560	236	0.110933
chr2	47303720	47304027	308	0.0840601
chr2	47395947	47396282	336	0.0975494
chr2	47537517	47538462	946	0.0986865
chr2	50256362	50256824	463	0.114151
chr2	51686964	51687293	330	0.112862
chr2	51688278	51688465	188	0.101935
chr2	54796062	54796367	306	0.0940911
chr2	54899887	54900398	512	0.139723
chr2	56344542	56345019	478	0.0924667
chr2	60487274	60487988	715	0.0851769
chr2	61734500	61734734	235	0.0887581
chr2	62436125	62437631	1507	0.090127
chr2	62929841	62930374	534	0.0996057
chr2	64091776	64092408	633	0.103365
chr2	64865064	64865200	137	0.108896
chr2	65091384	65091868	485	0.175061
chr2	65254903	65256279	1377	0.0856762
chr2	65343453	65343518	66	0.135775
chr2	65493698	65494126	429	0.0870377
chr2	65586491	65586926	436	0.108045
chr2	65617203	65617905	703	0.148731
chr2	65864085	65864304	220	0.0976816
chr2	68386617	68386735	119	0.103555
chr2	69003114	69003958	845	0.0838173
chr2	69536270	69536580	311	0.0914362
chr2	69825890	69826169	280	0.0898775
chr2	70172922	70174011	1090	0.100317
chr2	70308758	70308864	107	0.086714
chr2	70317229	70317736	508	0.194132
chr2	70318122	70318818	697	0.117638
chr2	70334754	70335360	607	0.113227
chr2	70350202	70350573	372	0.106876
chr2	70418473	70418647	175	0.109112
chr2	70486048	70486267	220	0.106846
chr2	74438191	74438578	388	0.0893538
chr2	74532060	74532107	48	0.0907987
chr2	75074851	75074926	76	0.0864944
chr2	80278909	80279172	264	0.109677
chr2	81757304	81757596	293	0.0977217
chr2	85185437	85186007	571	0.104949
chr2	85186394	85186642	249	0.0978197
chr2	85632656	85633752	1097	0.1221
chr2	85972061	85972269	209	0.0938007
chr2	86006389	86007174	786	0.0948954
chr2	86671251	86671361	111	0.113619
chr2	86672683	86672937	255	0.0931599
chr2	88467929	88468008	80	0.102036
chr2	88928134	88928478	345	0.102037
chr2	89182430	89182993	564	0.103762
chr2	95662378	95662610	233	0.0806492
chr2	95663668	95663681	14	0.0945238
chr2	96814814	96815058	245	0.0874707
chr2	98289680	98290087	408	0.0959861
chr2	98579156	98579411	256	0.121479
chr2	99333467	99334240	774	0.0961036
chr2	99358333	99358360	28	0.0839786
chr2	99358682	99358796	115	0.0850003
chr2	101156447	101156747	301	0.0895838
chr2	101519255	101519950	696	0.0885772
chr2	102066808	102067214	407	0.0940152
chr2	102149954	102150523	570	0.0997447
chr2	102233827	102234582	756	0.08881
chr2	102563712	102564093	382	0.0944581
chr2	102771650	102771864	215	0.0838987
chr2	103259834	103259986	153	0.100742
chr2	106004546	106005017	472	0.120379
chr2	106472569	106473074	506	0.112615
chr2	106887507	106888369	863	0.102328
chr2	109316652	109316992	341	0.100247
chr2	109748427	109749026	600	0.0960301
chr2	110076559	110076887	329	0.0819206
chr2	112915130	112915506	377	0.104456
chr2	113301250	113301558	309	0.211307
chr2	113433771	113433914	144	0.0947493
chr2	114735443	114735620	178	0.086664
chr2	115155423	115155439	17	0.0874987
chr2	118717770	118718378	609	0.0832271
chr2	118718716	118719133	418	0.0806335
chr2	119538732	119539175	444	0.113217
chr2	119937784	119937945	162	0.0818187
chr2	120822733	120822934	202	0.109569
chr2	121404617	121404700	84	0.0862393
chr2	121741078	121741709	632	0.102255
chr2	128281317	128281565	249	0.191942
chr2	128936952	128937284	333	0.0988728
chr2	128937705	128937999	295	0.094181
chr2	129413359	129413862	504	0.101991
chr2	130636209	130636420	212	0.104955
chr2	133382019	133382768	750	0.0811963
chr2	134884650	134885382	733	0.12097
chr2	136498834	136498960	127	0.115492
chr2	136573159	136573841	683	0.0969618
chr2	147142856	147143136	281	0.0908802
chr2	148494469	148494671	203	0.0942788
chr2	153492010	153492558	549	0.0847512
chr2	153492884	153493411	528	0.0851952
chr2	158289532	158289741	210	0.118686
chr2	161267011	161267286	276	0.105045
chr2	161947867	161948414	548	0.0927381
chr2	161960068	161960329	262	0.0870637
chr2	161960690	161960904	215	0.0834604
chr2	169397694	169397803	110	0.102305
chr2	171168671	171169307	637	0.0927694
chr2	172886076	172886649	574	0.115078
chr2	175480993	175481145	153	0.119633
chr2	177503704	177503930	227	0.0919023
chr2	178101815	178102092	278	0.0997247
chr2	178102582	178102857	276	0.114679
chr2	178124386	178124435	50	0.0893295
chr2	180104974	180105315	342	0.0982523
chr2	191271368	191271691	324	0.0877136
chr2	191342625	191342897	273	0.0922239
chr2	191425743	191426206	464	0.111838
chr2	191875646	191876068	423	0.0940334
chr2	196527133	196527225	93	0.104683
chr2	196527685	196527783	99	0.0956259
chr2	197027317	197027743	427	0.102773
chr2	197586393	197586705	313	0.114242
chr2	198011796	198011957	162	0.103312
chr2	198081233	198081510	278	0.10709
chr2	201117085	201117621	537	0.084728
chr2	203885839	203885996	158	0.0923718
chr2	210331963	210332092	130	0.118978
chr2	210546955	210547731	777	0.100977
chr2	211286815	211287333	519	0.103848
chr2	216612838	216613817	980	0.10168
chr2	216846669	216846771	103	0.0828425
chr2	216871480	216872043	564	0.179991
chr2	216975904	216976969	1066	0.105492
chr2	217546150	217546164	15	0.0885179
chr2	218375557	218375971	415	0.11076
chr2	219154857	219155314	458	0.0896591
chr2	219203287	219203672	386	0.10105
chr2	219269244	219269332	89	0.0845475
chr2	219607567	219608075	509	0.105982
chr2	220503463	220503961	499	0.097825
chr2	221753894	221754007	114	0.0833482
chr2	222346908	222346954	47	0.0953694
chr2	222347257	222347634	378	0.0903814
chr2	222392030	222392307	278	0.0866888
chr2	222986395	222986648	254	0.0983496
chr2	223765230	223765491	262	0.102535
chr2	224558783	224559642	860	0.124034
chr2	225087207	225087828	622	0.105228
chr2	225442007	225442272	266	0.0947937
chr2	225788179	225789157	979	0.100409
chr2	228239014	228239086	73	0.115992
chr2	228507564	228507831	268	0.0929015
chr2	229463781	229464222	442	0.0874145
chr2	231449407	231449453	47	0.081517
chr2	231622091	231623004	914	0.120955
chr2	231647289	231647469	181	0.100841
chr2	232085794	232086754	961	0.0891483
chr2	233242839	233243603	765	0.117976
chr2	234276164	234276451	288	0.0955893
chr2	234289349	234290306	958	0.0966557
chr2	235043082	235043788	707	0.105319
chr2	235862087	235862332	246	0.0915379
chr2	236377379	236378041	663	0.108766
chr2	236396102	236396195	94	0.103134
chr2	237247321	237247816	496	0.0852552
chr2	237803188	237803366	179	0.0811115
chr2	238185999	238186100	102	0.119887
chr2	238187218	238187418	201	0.123041
chr2	238498412	238498616	205	0.116105
chr2	238675751	238676776	1026	0.0926249
chr2	238874695	238874805	111	0.0856619
chr2	238892750	238893727	978	0.109443
chr2	239110023	239111040	1018	0.156353
chr2	240208280	240209304	1025	0.110857
chr2	240290902	240291711	810	0.102846
chr2	240459428	240459873	446	0.0976651
chr2	240578228	240578616	389	0.0964888
chr2	240985618	240986792	1175	0.102662
chr2	242201168	242201407	240	0.0868679
chr2	242241126	242241936	811	0.100799
chr2	242574503	242574778	276	0.100938
chr20	3071869	3072384	516	0.11401
chr20	6644510	6644734	225	0.0869227
chr20	7848615	7849028	414	0.100678
chr20	9808762	9808928	167	0.0982328
chr20	10416458	10416798	341	0.0885716
chr20	16734058	16734293	236	0.0969835
chr20	16854266	16854440	175	0.0868611
chr20	17625312	17625387	76	0.0820841
chr20	17654834	17656141	1308	0.105598
chr20	18749366	18750290	925	0.0922653
chr20	18972382	18972828	447	0.0944759
chr20	19190431	19190520	90	0.106388
chr20	19919003	19919361	359	0.12079
chr20	20312879	20313049	171	0.117454
chr20	20313405	20313612	208	0.103489
chr20	20661661	20661772	112	0.10228
chr20	23139818	23140000	183	0.10861
chr20	23639933	23640026	94	0.106039
chr20	25059364	25059479	116	0.0817501
chr20	30871635	30872076	442	0.104865
chr20	31252516	31253096	581	0.0879432
chr20	31434938	31435441	504	0.0830541
chr20	31870775	31871609	835	0.0811222
chr20	32030414	32030495	82	0.0950559
chr20	32064246	32064376	131	0.0855229
chr20	32252164	32252706	543	0.120934
chr20	32414992	32415744	753	0.0911221
chr20	32654742	32655734	993	0.0890043
chr20	32675495	32676531	1037	0.0955244
chr20	33733327	33733559	233	0.100521
chr20	34875053	34876318	1266	0.12439
chr20	35580829	35580972	144	0.116025
chr20	36762837	36763783	947	0.0962585
chr20	39312778	39314072	1295	0.110455
chr20	43274909	43275182	274	0.0804181
chr20	44186361	44186690	330	0.0817228
chr20	46368868	46369070	203	0.102341
chr20	46369416	46370387	972	0.121929
chr20	46385116	46385955	840	0.0988438
chr20	46389348	46390259	912	0.0844923
chr20	46906430	46907135	706	0.0928576
chr20	47131183	47131320	138	0.147714
chr20	47335707	47336531	825	0.115322
chr20	47379129	47379519	391	0.0996657
chr20	47436108	47436646	539	0.114536
chr20	47782152	47782338	187	0.10594
chr20	48247602	48247824	223	0.0903823
chr20	48300121	48300415	295	0.105741
chr20	48300772	48301156	385	0.102641
chr20	48306021	48306453	433	0.121056
chr20	48322025	48322721	697	0.149662
chr20	48770918	48771189	272	0.10745
chr20	48783543	48783559	17	0.0861187
chr20	48804970	48805145	176	0.0816775
chr20	48854655	48854815	161	0.0813813
chr20	48894042	48894942	901	0.098622
chr20	48955650	48956351	702	0.0956598
chr20	49129848	49130029	182	0.109815
chr20	49959590	49959988	399	0.0885274
chr20	55782901	55783421	521	0.082383
chr20	56228545	56229411	867	0.116198
chr20	56233101	56233890	790	0.104711
chr20	56243866	56244170	305	0.10694
chr20	56268521	56269326	806	0.0915824
chr20	56270172	56270546	375	0.0797533
chr20	56881872	56882357	486	0.116552
chr20	57012281	57013536	1256	0.103355
chr20	57470994	57471266	273	0.102164
chr20	57874279	57874414	136	0.114147
chr20	58244545	58244938	394	0.0858577
chr20	58399205	58399991	787	0.0827354
chr20	61167573	61168071	499	0.096744
chr20	61199339	61199804	466	0.0902893
chr20	61864616	61864972	357	0.111305
chr20	62034919	62035206	288	0.0887657
chr21	16416419	16416878	460	0.115412
chr21	16418124	16418346	223	0.0904317
chr21	18908720	18908927	208	0.178475
chr21	26758253	26758538	286	0.121971
chr21	30566977	30567318	342	0.111613
chr21	30986564	30987261	698	0.0904512
chr21	31019453	31019853	401	0.108467
chr21	33031193	33031450	258	0.118946
chr21	33260619	33260787	169	0.109423
chr21	33944718	33945069	352	0.132876
chr21	34369864	34369956	93	0.0966552
chr21	34447840	34448428	589	0.0937571
chr21	35389259	35389838	580	0.100775
chr21	35390282	35390587	306	0.109617
chr21	35882579	35883588	1010	0.102674
chr21	36179509	36179898	390	0.117319
chr21	36229248	36230540	1293	0.102606
chr21	36568749	36569037	289	0.0888532
chr21	36832975	36833281	307	0.125754
chr21	38034067	38034184	118	0.0866314
chr21	38418822	38419441	620	0.0957561
chr21	39654348	39654866	519	0.107347
chr21	39657051	39657893	843	0.124956
chr21	40272668	40273596	929	0.123801
chr21	40331410	40331726	317	0.0968011
chr21	41942544	41942646	103	0.0906761
chr21	42043710	42044279	570	0.0938135
chr21	43171957	43172621	665	0.0960659
chr21	44202508	44202662	155	0.0834766
chr21	44219568	44219864	297	0.108732
chr21	44853659	44853771	113	0.0893036
chr21	45191922	45192623	702	0.0865824
chr21	45434161	45434568	408	0.160414
chr21	45594673	45595137	465	0.112232
chr21	45627757	45628166	410	0.104331
chr21	46236351	46236387	37	0.0844078
chr21	46589649	46590020	372	0.0919699
chr21	46880664	46881546	883	0.0872135
chr21	46927440	46927590	151	0.0988846
chr21	47251914	47252505	592	0.0995881
chr21	47305000	47305169	170	0.124289
chr22	17587971	17588325	355	0.0948388
chr22	20889283	20889760	478	0.0978639
chr22	23536894	23537345	452	0.0980849
chr22	24019484	24019539	56	0.151991
chr22	24103781	24104046	266	0.096522
chr22	24796780	24798636	1857	0.112468
chr22	25201674	25201680	7	0.104505
chr22	25517093	25517167	75	0.0907418
chr22	26880879	26881198	320	0.0952367
chr22	27230597	27231095	499	0.084508
chr22	29508889	29509142	254	0.102255
chr22	29509588	29509852	265	0.0985051
chr22	30053940	30054344	405	0.0905705
chr22	30299502	30299624	123	0.108781
chr22	30747018	30747061	44	0.101473
chr22	30747367	30748043	677	0.101174
chr22	31064759	31064956	198	0.104505
chr22	33242850	33243452	603	0.105678
chr22	36628425	36629003	579	0.108138
chr22	36736694	36737035	342	0.0980614
chr22	36762281	36762800	520	0.094454
chr22	37269901	37270627	727	0.0959507
chr22	37360946	37361385	440	0.0874038
chr22	38544089	38544345	257	0.094908
chr22	38615591	38615939	349	0.1371
chr22	39149472	39149689	218	0.0986176
chr22	39334948	39335827	880	0.112535
chr22	40448607	40448812	206	0.089111
chr22	41808582	41808900	319	0.110247
chr22	43567710	43567890	181	0.082992
chr22	43812863	43813074	212	0.0891637
chr22	44946910	44947404	495	0.10503
chr22	45097327	45097398	72	0.131588
chr22	45501510	45502169	660	0.091858
chr22	46127142	46127771	630	0.124747
chr22	47147378	47147744	367	0.100386
chr22	49095478	49096275	798	0.114958
chr22	50325338	50325926	589	0.107783
chr22	50654203	50654412	210	0.0850698
chr22	50965918	50966362	445	0.124996
chr22	51171260	51171496	237	0.0868436
chr3	4781168	4781888	721	0.112096
chr3	4879240	4880024	785	0.115337
chr3	4880338	4881048	711	0.106407
chr3	5029603	5030652	1050	0.123936
chr3	5036613	5037600	988	0.121258
chr3	5317914	5318619	706	0.106542
chr3	5466408	5467647	1240	0.114922
chr3	7552048	7552596	549	0.095947
chr3	8484901	8485051	151	0.113161
chr3	8603196	8603416	221	0.0860347
chr3	9886189	9886363	175	0.0995388
chr3	11268811	11269267	457	0.10911
chr3	11815693	11815996	304	0.120478
chr3	12026575	12028173	1599	0.106035
chr3	12601846	12602399	554	0.102668
chr3	12602829	12603155	327	0.11022
chr3	14296780	14297159	380	0.0987026
chr3	14474479	14475266	788	0.127428
chr3	14557390	14557630	241	0.0932293
chr3	14642217	14642325	109	0.0851069
chr3	14853915	14854316	402	0.0927872
chr3	15445871	15446109	239	0.109429
chr3	23225397	23225558	162	0.0972565
chr3	25086473	25086887	415	0.103502
chr3	27573754	27574039	286	0.0868151
chr3	30688510	30688672	163	0.116225
chr3	31947539	31947866	328	0.0905607
chr3	33637914	33637935	22	0.0869177
chr3	37949630	37949725	96	0.101947
chr3	37950762	37951501	740	0.10615
chr3	39191904	39192965	1062	0.127572
chr3	39302605	39302643	39	0.0967555
chr3	40830892	40831040	149	0.0998363
chr3	44561379	44561571	193	0.0861794
chr3	45083518	45083767	250	0.0911986
chr3	45694422	45695038	617	0.0897748
chr3	47002094	47002303	210	0.0857483
chr3	47002659	47003622	964	0.0936714
chr3	48154210	48154886	677	0.100483
chr3	48263421	48265035	1615	0.105396
chr3	48513119	48513335	217	0.109487
chr3	49418833	49419037	205	0.0912715
chr3	49426338	49426512	175	0.10569
chr3	52309615	52309886	272	0.1584
chr3	53166458	53166759	302	0.0892241
chr3	55574688	55574834	147	0.117202
chr3	56891690	56892019	330	0.141448
chr3	58257689	58258231	543	0.0983155
chr3	59496297	59496690	394	0.110702
chr3	61586915	61587226	312	0.090851
chr3	63920361	63921431	1071	0.129731
chr3	64169587	64169657	71	0.0993678
chr3	66025754	66026123	370	0.208734
chr3	67348516	67348621	106	0.102054
chr3	67349566	67350202	637	0.103866
chr3	68386162	68387189	1028	0.0935122
chr3	68409320	68409616	297	0.0898265
chr3	71491386	71492722	1337	0.106617
chr3	71564259	71564700	442	0.100773
chr3	71565003	71565337	335	0.100416
chr3	71628885	71629213	329	0.0903623
chr3	72035493	72036515	1023	0.107764
chr3	73653346	73653924	579	0.10801
chr3	97700699	97701024	326	0.142468
chr3	101578661	101579316	656	0.109382
chr3	105083700	105083963	264	0.0971414
chr3	105625765	105626025	261	0.133792
chr3	106954806	106955296	491	0.0957725
chr3	107382250	107382517	268	0.134815
chr3	111434868	111434978	111	0.0914628
chr3	112237938	112238231	294	0.132588
chr3	112885572	112886243	672	0.0994267
chr3	115797452	115797617	166	0.0950272
chr3	116116390	116116637	248	0.0996242
chr3	124527996	124528346	351	0.087521
chr3	124855319	124856095	777	0.105348
chr3	127306805	127307564	760	0.0914636
chr3	127487265	127487944	680	0.108178
chr3	127542644	127542753	110	0.0895658
chr3	127774191	127774445	255	0.111953
chr3	128478129	128479143	1015	0.110349
chr3	128479454	128479920	467	0.0935408
chr3	128672080	128672096	17	0.126763
chr3	129148047	129148102	56	0.109437
chr3	129272237	129272922	686	0.107721
chr3	133180879	133181256	378	0.0896768
chr3	133463834	133464247	414	0.116734
chr3	138638170	138638326	157	0.10664
chr3	140883110	140883160	51	0.0955454
chr3	141220063	141220420	358	0.10509
chr3	143504426	143505746	1321	0.117085
chr3	147115242	147115744	503	0.103628
chr3	149345540	149345597	58	0.0960668
chr3	150966757	150967759	1003	0.104377
chr3	152091100	152091411	312	0.165855
chr3	156200846	156200997	152	0.0960112
chr3	156201524	156201977	454	0.0947738
chr3	156391370	156391492	123	0.106515
chr3	169581340	169581538	199	0.105505
chr3	169772871	169773337	467	0.0891178
chr3	170117642	170118188	547	0.10308
chr3	171816676	171816833	158	0.114982
chr3	171899739	171900509	771	0.121066
chr3	171956147	171956549	403	0.10767
chr3	171957120	171957345	226	0.107281
chr3	172556337	172556463	127	0.0914383
chr3	177054946	177055344	399	0.111508
chr3	177311442	177312110	669	0.109584
chr3	178978765	178978776	12	0.103457
chr3	179158441	179159658	1218	0.118191
chr3	182898953	182899048	96	0.148198
chr3	183268600	183268646	47	0.103252
chr3	183496988	183497123	136	0.107442
chr3	185069219	185069960	742	0.124113
chr3	187079738	187080503	766	0.096621
chr3	187680689	187681951	1263	0.102175
chr3	187989665	187990865	1201	0.101674
chr3	188116107	188117046	940	0.100363
chr3	189679996	189680371	376	0.157227
chr3	189700284	189700545	262	0.103924
chr3	191055945	191056252	308	0.123058
chr3	192530104	192530824	721	0.101405
chr3	192609558	192610269	712	0.144877
chr3	193328993	193329125	133	0.129771
chr3	193586310	193586693	384	0.0989975
chr3	193689649	193689697	49	0.140523
chr3	194065415	194066410	996	0.0995058
chr3	194403466	194404109	644	0.149872
chr3	194748914	194749846	933	0.108551
chr3	194979243	194979947	705	0.108602
chr3	195129009	195129085	77	0.0896121
chr3	196037262	196037578	317	0.0917143
chr3	196051070	196051400	331	0.0930621
chr3	196226735	196226965	231	0.113181
chr4	108287	108440	154	0.0926018
chr4	205299	205522	224	0.130257
chr4	1558883	1558989	107	0.088191
chr4	1720817	1721563	747	0.105465
chr4	2496916	2497309	394	0.101776
chr4	2772119	2772720	602	0.122161
chr4	2933798	2934592	795	0.0928585
chr4	3074893	3075136	244	0.103092
chr4	3348592	3348909	318	0.099681
chr4	7958232	7958702	471	0.104627
chr4	8275378	8275460	83	0.0898969
chr4	8420747	8420888	142	0.105422
chr4	15783101	15783713	613	0.106455
chr4	17388720	17389306	587	0.094319
chr4	23905724	23906055	332	0.0993618
chr4	24913332	24913419	88	0.101555
chr4	30584863	30584883	21	0.101152
chr4	37980351	37980419	69	0.106267
chr4	37996144	37996792	649	0.0991715
chr4	39396602	39396734	133	0.106604
chr4	40950398	40950495	98	0.0933624
chr4	47841314	47841622	309	0.113
chr4	53523077	53523774	698	0.0990173
chr4	56226796	56227152	357	0.121213
chr4	56662101	56662350	250	0.0933383
chr4	66865000	66865233	234	0.105279
chr4	71524120	71524594	475	0.0994341
chr4	77130766	77131136	371	0.11243
chr4	77991463	77992333	871	0.106708
chr4	78047386	78047652	267	0.0913103
chr4	78569499	78570278	780	0.100316
chr4	83708544	83708674	131	0.117335
chr4	83730275	83730324	50	0.0928641
chr4	86646575	86646889	315	0.101122
chr4	89109110	89109510	401	0.105901
chr4	90206345	90206370	26	0.105404
chr4	95366219	95366513	295	0.0996695
chr4	100772233	100772434	202	0.10476
chr4	100773005	100773303	299	0.0981989
chr4	103734398	103734595	198	0.151775
chr4	103738876	103739200	325	0.138387
chr4	106889795	106890076	282	0.0914684
chr4	108132095	108133336	1242	0.120859
chr4	120023947	120024531	585	0.11305
chr4	120026173	120026339	167	0.129081
chr4	121690993	121691479	487	0.140492
chr4	135817860	135818050	191	0.11275
chr4	139814792	139814941	150	0.180112
chr4	139839291	139839619	329	0.123215
chr4	140472376	140472490	115	0.0955803
chr4	140707463	140708447	985	0.110361
chr4	140709324	140709879	556	0.146376
chr4	143269115	143269340	226	0.116744
chr4	143340377	143340593	217	0.102378
chr4	144110758	144110879	122	0.12255
chr4	144269642	144270022	381	0.113245
chr4	151749242	151749739	498	0.100874
chr4	151980507	151980564	58	0.102248
chr4	152460449	152460647	199	0.0952488
chr4	154186784	154187238	455	0.118945
chr4	154402969	154403285	317	0.100979
chr4	160098618	160099109	492	0.162741
chr4	160099957	160100002	46	0.151378
chr4	160101055	160101444	390	0.0966903
chr4	164418050	164418255	206	0.107237
chr4	166217268	166217898	631	0.108387
chr4	170949343	170949618	276	0.126349
chr4	178560795	178561030	236	0.0993641
chr4	182439859	182440414	556	0.112029
chr4	186136110	186136587	478	0.0999468
chr4	186727901	186728025	125	0.11374
chr4	187590208	187590278	71	0.0930912
chr4	188534292	188534438	147	0.118154
chr4	190701836	190702419	584	0.104492
chr5	58120	58487	368	0.097323
chr5	575721	576088	368	0.101731
chr5	981178	981305	128	0.114159
chr5	2604339	2604562	224	0.106408
chr5	3241567	3241824	258	0.128465
chr5	5274276	5274613	338	0.119707
chr5	5559618	5560364	747	0.117332
chr5	6083003	6083536	534	0.0867887
chr5	6492819	6493910	1092	0.0936279
chr5	7754806	7755991	1186	0.0889534
chr5	10562310	10563214	905	0.103909
chr5	10884927	10885450	524	0.0991225
chr5	13843153	13843477	325	0.0957522
chr5	17188919	17189036	118	0.0965606
chr5	17238802	17240165	1364	0.115741
chr5	17315993	17316279	287	0.11746
chr5	29516024	29516408	385	0.110977
chr5	31821737	31821880	144	0.0979116
chr5	32233775	32234293	519	0.100795
chr5	37856472	37856519	48	0.0995292
chr5	38514983	38515346	364	0.0917411
chr5	39459129	39459260	132	0.092437
chr5	39583324	39583567	244	0.104198
chr5	50883040	50883818	779	0.105741
chr5	53592004	53592969	966	0.112406
chr5	54039544	54039997	454	0.145718
chr5	54530902	54531230	329	0.160535
chr5	54946386	54946649	264	0.122485
chr5	55904123	55904250	128	0.0895246
chr5	55904571	55904676	106	0.0952162
chr5	55905765	55906354	590	0.123294
chr5	57461071	57461974	904	0.107938
chr5	60541058	60541552	495	0.0985231
chr5	62802933	62803090	158	0.0960493
chr5	65225486	65225763	278	0.143936
chr5	65801261	65801628	368	0.103192
chr5	70965063	70965126	64	0.103981
chr5	76016911	76017283	373	0.103856
chr5	76507680	76507766	87	0.0999509
chr5	90430099	90430302	204	0.0928658
chr5	90608967	90609338	372	0.0914605
chr5	92936741	92937365	625	0.103947
chr5	93957398	93957622	225	0.101563
chr5	95132935	95133485	551	0.0945971
chr5	95215342	95215976	635	0.103718
chr5	112395330	112395762	433	0.0956745
chr5	118669038	118669440	403	0.0955623
chr5	119481694	119481938	245	0.120603
chr5	123862725	123863406	682	0.098101
chr5	127901146	127901645	500	0.102598
chr5	128365414	128365706	293	0.105836
chr5	130605443	130606062	620	0.107108
chr5	131794674	131796013	1340	0.0990493
chr5	131801946	131802523	578	0.09572
chr5	131816305	131816993	689	0.139595
chr5	132627407	132628147	741	0.100487
chr5	134565038	134565256	219	0.112039
chr5	136430585	136430645	61	0.0920387
chr5	136911751	136912058	308	0.16559
chr5	137855070	137855090	21	0.0894356
chr5	138109361	138109910	550	0.102153
chr5	138839967	138840009	43	0.0865455
chr5	139041951	139043015	1065	0.0992895
chr5	139485947	139486600	654	0.213562
chr5	141473623	141474128	506	0.0978814
chr5	142130201	142130629	429	0.106618
chr5	149054330	149054694	365	0.0887809
chr5	149368091	149369073	983	0.0954467
chr5	150035729	150035759	31	0.0925262
chr5	150431162	150431736	575	0.0897212
chr5	150457949	150458817	869	0.143452
chr5	151042112	151042407	296	0.0908301
chr5	151077090	151077596	507	0.0955628
chr5	154148164	154149406	1243	0.0968283
chr5	159579860	159580607	748	0.103378
chr5	167753832	167754826	995	0.118646
chr5	170170349	170170616	268	0.0949805
chr5	171590931	171590943	13	0.0968454
chr5	172115348	172115564	217	0.0958557
chr5	172201916	172202478	563	0.0985759
chr5	173070230	173071132	903	0.0896495
chr5	173116871	173117421	551	0.0907854
chr5	173767277	173768453	1177	0.0981244
chr5	176513410	176513591	182	0.137406
chr5	177869437	177870299	863	0.111245
chr5	178124614	178124778	165	0.128259
chr5	178728316	178728597	282	0.0946454
chr5	179485471	179485515	45	0.0979032
chr5	179525053	179525734	682	0.0890135
chr5	180225988	180227790	1803	0.129539
chr6	218899	219743	845	0.097513
chr6	1407826	1408615	790	0.0896311
chr6	1525531	1525570	40	0.0966299
chr6	1769796	1770070	275	0.0991314
chr6	1771626	1771723	98	0.0877586
chr6	2449181	2449254	74	0.0916918
chr6	2808008	2808904	897	0.0987205
chr6	2918603	2920178	1576	0.100161
chr6	2961234	2962408	1175	0.0948121
chr6	3405683	3405784	102	0.0960089
chr6	5439805	5440173	369	0.0868139
chr6	5970329	5970940	612	0.104172
chr6	6881987	6882328	342	0.0878879
chr6	7059357	7059610	254	0.0969319
chr6	7479489	7479825	337	0.113919
chr6	7738595	7738910	316	0.0867356
chr6	8884070	8884382	313	0.0835305
chr6	11938654	11939555	902	0.0930123
chr6	12046741	12046997	257	0.141084
chr6	13406132	13406774	643	0.088296
chr6	14664520	14665296	777	0.106477
chr6	14781540	14781866	327	0.0903831
chr6	15346789	15346852	64	0.0952384
chr6	15764889	15765312	424	0.1175
chr6	16729533	16730508	976	0.115684
chr6	17905592	17905886	295	0.121746
chr6	17970442	17970880	439	0.0987096
chr6	18981449	18981685	237	0.140717
chr6	21372003	21372248	246	0.0885153
chr6	21543085	21543210	126	0.108717
chr6	21852768	21852843	76	0.118246
chr6	21947355	21947445	91	0.0905177
chr6	21947948	21948636	689	0.0971654
chr6	21985681	21986576	896	0.164744
chr6	22043778	22044093	316	0.0951608
chr6	27463974	27464084	111	0.103551
chr6	27740990	27741349	360	0.0963353
chr6	28721336	28721420	85	0.0972393
chr6	28985791	28985920	130	0.0983057
chr6	30656463	30657042	580	0.118318
chr6	30780269	30780573	305	0.200957
chr6	30846720	30846829	110	0.118587
chr6	31089157	31089909	753	0.106844
chr6	31155186	31155470	285	0.105473
chr6	31172932	31172957	26	0.0930302
chr6	31370155	31370283	129	0.0959075
chr6	31500213	31500625	413	0.116236
chr6	31566214	31566396	183	0.0942791
chr6	31629088	31629252	165	0.166758
chr6	31732103	31732516	414	0.0847338
chr6	33165577	33166165	589	0.0968602
chr6	34210746	34211189	444	0.0959163
chr6	34661170	34661881	712	0.119664
chr6	35452667	35453345	679	0.12077
chr6	35644814	35645341	528	0.0892445
chr6	36095477	36096269	793	0.129755
chr6	36355990	36356244	255	0.105425
chr6	37132460	37132775	316	0.14778
chr6	39896888	39898287	1400	0.0920816
chr6	41571341	41571633	293	0.0966862
chr6	41757098	41757330	233	0.101783
chr6	43367900	43368158	259	0.12709
chr6	43772270	43772599	330	0.0913515
chr6	43976386	43976998	613	0.0923449
chr6	47001104	47001345	242	0.0955453
chr6	47374687	47375071	385	0.103715
chr6	50061300	50061398	99	0.0924226
chr6	51377489	51377837	349	0.13204
chr6	52459608	52460072	465	0.0872044
chr6	52536736	52537406	671	0.106121
chr6	56176741	56177039	299	0.0937843
chr6	69081462	69082084	623	0.0918082
chr6	71435070	71435690	621	0.0980682
chr6	71826098	71826746	649	0.137391
chr6	80239120	80239384	265	0.110823
chr6	87923663	87924531	869	0.0956957
chr6	88406702	88406751	50	0.123594
chr6	91292870	91293142	273	0.0999356
chr6	97240535	97240781	247	0.0999492
chr6	98932427	98932781	355	0.0882505
chr6	99875211	99875616	406	0.134945
chr6	106050775	106051219	445	0.10507
chr6	108085417	108085960	544	0.0897795
chr6	108277159	108277682	524	0.121212
chr6	109011561	109012181	621	0.125434
chr6	110502921	110503254	334	0.102086
chr6	110725740	110726432	693	0.10107
chr6	111612290	111612354	65	0.0982054
chr6	111880445	111881403	959	0.0949714
chr6	113990754	113991107	354	0.0980853
chr6	114079690	114079953	264	0.0877509
chr6	114331310	114331565	256	0.0954506
chr6	114332146	114332475	330	0.0912752
chr6	116619473	116620118	646	0.0884788
chr6	117998849	117999169	321	0.128814
chr6	119624756	119625146	391	0.0877733
chr6	124047572	124047645	74	0.0935335
chr6	125323443	125323862	420	0.100979
chr6	130356025	130356177	153	0.0862725
chr6	130356607	130356848	242	0.0866141
chr6	132777278	132778275	998	0.0989576
chr6	133055528	133056004	477	0.133259
chr6	137467605	137468209	605	0.0946401
chr6	137559310	137559633	324	0.103271
chr6	137731942	137732400	459	0.101277
chr6	139458050	139458169	120	0.162685
chr6	140202506	140202626	121	0.101313
chr6	140203171	140203833	663	0.134844
chr6	144472963	144473331	369	0.106352
chr6	150306067	150306149	83	0.0909357
chr6	154693876	154694042	167	0.105385
chr6	154801192	154801770	579	0.0882724
chr6	156972736	156972896	161	0.0867386
chr6	157271236	157271889	654	0.0991735
chr6	157396821	157396854	34	0.091258
chr6	158494472	158495006	535	0.13224
chr6	158745325	158745518	194	0.0955743
chr6	159052400	159053465	1066	0.118401
chr6	159074635	159075723	1089	0.107471
chr6	159202424	159203197	774	0.0902677
chr6	159235020	159235557	538	0.0984243
chr6	159291532	159291890	359	0.125292
chr6	161494443	161495168	726	0.0936231
chr6	163753287	163753884	598	0.103386
chr6	163825966	163826532	567	0.0859179
chr6	164279295	164279634	340	0.0910256
chr6	167164969	167165445	477	0.0959039
chr6	167853324	167853567	244	0.0902354
chr6	168150965	168152856	1892	0.0976929
chr6	168469565	168469636	72	0.0823261
chr7	1990949	1991147	199	0.0813056
chr7	2139395	2139510	116	0.0820704
chr7	2439366	2439388	23	0.093139
chr7	2439690	2440613	924	0.112494
chr7	4563723	4564180	458	0.0911688
chr7	4766239	4766431	193	0.0908678
chr7	5564774	5566380	1607	0.116936
chr7	6095052	6095262	211	0.165739
chr7	6542444	6542691	248	0.0887994
chr7	7059542	7060335	794	0.0947818
chr7	9334210	9334496	287	0.109427
chr7	14761702	14762167	466	0.114086
chr7	17492727	17493006	280	0.0941213
chr7	19753028	19753412	385	0.0900676
chr7	21111059	21111702	644	0.084088
chr7	22121820	22122077	258	0.0959663
chr7	22481813	22482213	401	0.0917169
chr7	26494984	26495283	300	0.080245
chr7	33644369	33644928	560	0.0951325
chr7	35294561	35294766	206	0.0877788
chr7	39337003	39337106	104	0.0909273
chr7	43609012	43609541	530	0.093637
chr7	46330687	46330869	183	0.0960327
chr7	47667228	47667931	704	0.0994877
chr7	47702880	47703521	642	0.0906604
chr7	49067892	49068156	265	0.101679
chr7	50892757	50892868	112	0.086529
chr7	51381748	51382037	290	0.109794
chr7	55254270	55254903	634	0.0846203
chr7	55600474	55601271	798	0.108378
chr7	65316965	65317059	95	0.111811
chr7	65499100	65499162	63	0.123351
chr7	65500297	65500367	71	0.101993
chr7	65662660	65662809	150	0.091428
chr7	65961715	65961721	7	0.108964
chr7	67645391	67646082	692	0.0934369
chr7	68684145	68684382	238	0.111163
chr7	70851367	70851600	234	0.0828912
chr7	71709894	71710252	359	0.0951583
chr7	72838941	72839549	609	0.0967354
chr7	73596063	73596340	278	0.109535
chr7	73623631	73623679	49	0.139534
chr7	73891217	73891431	215	0.117033
chr7	75475421	75475818	398	0.114185
chr7	75888112	75888385	274	0.0846659
chr7	75975572	75976635	1064	0.0999338
chr7	75980885	75981776	892	0.0924235
chr7	75982817	75984466	1650	0.0985771
chr7	76958678	76958950	273	0.0897451
chr7	84829210	84829308	99	0.106456
chr7	85109539	85109817	279	0.116466
chr7	86686820	86687551	732	0.112566
chr7	90248438	90248496	59	0.117284
chr7	92745235	92745432	198	0.0931395
chr7	93933373	93933649	277	0.0881959
chr7	95137150	95137240	91	0.123147
chr7	95848250	95848438	189	0.109398
chr7	97761230	97761585	356	0.0911105
chr7	97848931	97848941	11	0.274389
chr7	98911244	98911489	246	0.0879364
chr7	99073672	99073715	44	0.0844294
chr7	99514120	99514418	299	0.108517
chr7	99608376	99608463	88	0.0918145
chr7	99739810	99740338	529	0.111721
chr7	100030435	100030735	301	0.0814218
[truncated: 257 more rows]

## Sheet: Table S7
Supplemental Table S7. Statistics of tissue DMRs between normal liver and lung
tDMRs	Number	Genomic size (bp)	Median size (bp)	ovelap with liver specific H3K4me1	ovelap with lung specific H3K4me1
Hyper DMRs	3058	2783250	786.5	291 (9.5%)	1266 (41.3%)
CGI DMRs (%)	315 (10.2%)	385673	1043	42 (13.3%)	172 (54.6%)
CGI shores DMRs(%)	976 (31.9%)	849364	745	175 (17.9%)	309 ( 31.7%)
other DMRs (%)	1767 (57.8%)	1548213	738	74 (4.2%)	785 (44.4%)
Hypo DMRs	17157	12294342	517	8862 (51.7%)	177 (1.0%)
CGI DMRs (%)	272 (1.6%)	308199	1012.5	127 (46.7%)	9 (3.3%)
CGI shores DMRs(%)	3265 (19.0%)	2958106	719	1586 (48.6%)	73 (2.2%)
other DMRs (%)	13620 (79.4%)	9028037	472	7149 (52.55)	95 (0.7%)

## Sheet: Table S8
Supplemental Table S8. List of identified tissue DMRs between normal liver and lung
chr	start	end	width	5mC meanDiff	direction (liver compared to lung)
chr1	941272	942498	1227	-0.224471	hypo
chr1	956751	957173	423	0.214945	hyper
chr1	1000745	1000965	221	-0.309596	hypo
chr1	1059878	1060947	1070	-0.202381	hypo
chr1	1063616	1064604	989	-0.226726	hypo
chr1	1100232	1101244	1013	-0.229042	hypo
chr1	1176165	1176777	613	0.214344	hyper
chr1	1225578	1226312	735	-0.233445	hypo
chr1	1278592	1280290	1699	-0.298718	hypo
chr1	1318232	1320381	2150	-0.2229	hypo
chr1	1335928	1338283	2356	-0.271869	hypo
chr1	1367420	1368719	1300	-0.227237	hypo
chr1	1397412	1398777	1366	0.21072	hyper
chr1	1422503	1423213	711	-0.353421	hypo
chr1	1460319	1460825	507	-0.297323	hypo
chr1	1512826	1513278	453	-0.200856	hypo
chr1	1609831	1610994	1164	-0.339029	hypo
chr1	1684241	1685726	1486	-0.310305	hypo
chr1	1688613	1691890	3278	-0.284312	hypo
chr1	1695138	1695594	457	-0.277168	hypo
chr1	1699337	1701037	1701	-0.347668	hypo
chr1	1841188	1842124	937	-0.218994	hypo
chr1	1854302	1855047	746	-0.205261	hypo
chr1	1894669	1895557	889	-0.229732	hypo
chr1	1978115	1979781	1667	-0.248361	hypo
chr1	2058466	2060437	1972	0.216828	hyper
chr1	2065031	2065349	319	0.238382	hyper
chr1	2066421	2067604	1184	0.232389	hyper
chr1	2068921	2069868	948	0.211721	hyper
chr1	2137604	2140119	2516	-0.254782	hypo
chr1	2143581	2146236	2656	0.258789	hyper
chr1	2146580	2148788	2209	-0.203296	hypo
chr1	2178754	2183365	4612	-0.238265	hypo
chr1	2200623	2203799	3177	-0.214636	hypo
chr1	2338520	2339135	616	-0.227895	hypo
chr1	2340190	2340939	750	-0.282099	hypo
chr1	2345141	2345615	475	-0.224976	hypo
chr1	2440765	2441788	1024	-0.248719	hypo
chr1	2458598	2460431	1834	-0.254719	hypo
chr1	2502341	2503079	739	-0.205479	hypo
chr1	2954538	2955140	603	-0.225559	hypo
chr1	2979248	2981129	1882	-0.207656	hypo
chr1	2987592	2989560	1969	0.264924	hyper
chr1	2990660	2991642	983	0.273159	hyper
chr1	2994860	2997074	2215	0.286585	hyper
chr1	3029470	3030595	1126	0.223413	hyper
chr1	3031157	3032751	1595	-0.26141	hypo
chr1	3041824	3043157	1334	-0.353573	hypo
chr1	3071527	3072563	1037	0.227568	hyper
chr1	3077265	3078388	1124	0.285663	hyper
chr1	3091156	3092001	846	0.204285	hyper
chr1	3102750	3103664	915	0.208772	hyper
chr1	3139470	3140811	1342	-0.218001	hypo
chr1	3209356	3210393	1038	-0.230441	hypo
chr1	3256528	3257976	1449	-0.224517	hypo
chr1	3275728	3276802	1075	0.202903	hyper
chr1	3445524	3446511	988	-0.20965	hypo
chr1	3459984	3460812	829	-0.211625	hypo
chr1	3461944	3463101	1158	-0.246331	hypo
chr1	3656713	3657329	617	-0.328324	hypo
chr1	3701670	3702208	539	-0.208556	hypo
chr1	3818885	3820579	1695	-0.220335	hypo
chr1	5663525	5663857	333	-0.20308	hypo
chr1	5808571	5809626	1056	-0.213274	hypo
chr1	5872474	5873540	1067	-0.205382	hypo
chr1	6009093	6010468	1376	-0.270754	hypo
chr1	6268575	6269913	1339	0.233594	hyper
chr1	6410827	6412113	1287	-0.266931	hypo
chr1	6412458	6413457	1000	-0.267014	hypo
chr1	6416087	6417036	950	-0.251652	hypo
chr1	6510773	6511026	254	-0.27024	hypo
chr1	6514498	6514731	234	0.27183	hyper
chr1	6515321	6516064	744	0.238342	hyper
chr1	6523508	6523514	7	-0.217776	hypo
chr1	6523912	6525078	1167	-0.311098	hypo
chr1	6530902	6532600	1699	-0.283593	hypo
chr1	6594226	6595607	1382	-0.293547	hypo
chr1	6641845	6642406	562	-0.201035	hypo
chr1	6681325	6683770	2446	-0.202788	hypo
chr1	6882588	6883365	778	-0.215148	hypo
chr1	6885585	6885964	380	-0.200113	hypo
chr1	7157476	7159441	1966	-0.272342	hypo
chr1	7634207	7635449	1243	-0.213812	hypo
chr1	8061894	8062397	504	-0.241331	hypo
chr1	8063706	8064212	507	-0.244572	hypo
chr1	8066518	8067358	841	-0.328265	hypo
chr1	8079382	8079491	110	-0.242127	hypo
chr1	8080635	8080900	266	-0.343965	hypo
chr1	8081920	8082613	694	-0.351071	hypo
chr1	8083011	8083585	575	-0.24327	hypo
chr1	8087102	8087273	172	-0.209267	hypo
chr1	8120725	8121247	523	0.208438	hyper
chr1	8229613	8230813	1201	-0.328768	hypo
chr1	8262103	8263531	1429	-0.210965	hypo
chr1	8298617	8300463	1847	-0.258443	hypo
chr1	8307164	8307585	422	-0.414786	hypo
chr1	8307952	8309190	1239	-0.339502	hypo
chr1	8323168	8324218	1051	-0.252064	hypo
chr1	8372311	8374186	1876	-0.273628	hypo
chr1	8403155	8404475	1321	0.230081	hyper
chr1	8475606	8476373	768	-0.217273	hypo
chr1	8479453	8480259	807	-0.217708	hypo
chr1	8480825	8481334	510	-0.296309	hypo
chr1	8802449	8803609	1161	-0.2182	hypo
chr1	9144541	9145914	1374	0.210486	hyper
chr1	9146273	9146409	137	0.212246	hyper
chr1	9172265	9173332	1068	-0.216392	hypo
chr1	9173656	9173730	75	-0.259875	hypo
chr1	9209944	9212248	2305	0.200525	hyper
chr1	9292949	9293230	282	-0.207992	hypo
chr1	9295826	9295973	148	-0.208428	hypo
chr1	9296338	9296659	322	-0.21575	hypo
chr1	9302572	9303279	708	-0.262899	hypo
chr1	9307974	9308517	544	-0.36068	hypo
chr1	9308950	9309459	510	-0.330741	hypo
chr1	9312124	9312182	59	-0.254316	hypo
chr1	9312662	9313411	750	-0.268973	hypo
chr1	9436588	9437872	1285	0.203521	hyper
chr1	9494444	9496130	1687	-0.235653	hypo
chr1	9496548	9496868	321	-0.233478	hypo
chr1	9497273	9499005	1733	-0.208395	hypo
chr1	9506728	9507778	1051	-0.223334	hypo
chr1	9512622	9515552	2931	-0.207818	hypo
chr1	9525561	9526645	1085	-0.24487	hypo
chr1	9552035	9553263	1229	-0.230032	hypo
chr1	9560912	9561675	764	-0.285061	hypo
chr1	9562652	9562849	198	-0.303514	hypo
chr1	9563162	9563699	538	-0.308703	hypo
chr1	9597808	9598207	400	-0.258285	hypo
chr1	9610344	9612134	1791	-0.330922	hypo
chr1	9613570	9614696	1127	-0.397605	hypo
chr1	9615455	9615685	231	-0.343016	hypo
chr1	9806902	9807003	102	0.217932	hyper
chr1	9952758	9953550	793	0.22109	hyper
chr1	10004290	10005013	724	-0.21207	hypo
chr1	10125110	10125765	656	-0.204641	hypo
chr1	10339821	10340012	192	-0.242249	hypo
chr1	10352491	10352911	421	-0.229809	hypo
chr1	10460570	10461250	681	-0.209304	hypo
chr1	10536419	10536843	425	-0.277878	hypo
chr1	10537158	10538225	1068	-0.321907	hypo
chr1	10550531	10551229	699	-0.221233	hypo
chr1	10613920	10616658	2739	-0.223461	hypo
chr1	10659334	10659434	101	-0.239805	hypo
chr1	10659766	10660247	482	-0.287889	hypo
chr1	10688348	10689391	1044	-0.210208	hypo
chr1	10695034	10696275	1242	0.259317	hyper
chr1	10710903	10712109	1207	0.203257	hyper
chr1	10726520	10727888	1369	0.226296	hyper
chr1	10730609	10731055	447	0.211391	hyper
chr1	10732273	10732872	600	0.200291	hyper
chr1	10742001	10743776	1776	0.261358	hyper
chr1	10796499	10798400	1902	0.208258	hyper
chr1	10818875	10820958	2084	-0.21082	hypo
chr1	11105886	11107886	2001	-0.420407	hypo
chr1	11212099	11213346	1248	-0.287778	hypo
chr1	11272171	11272636	466	-0.215208	hypo
chr1	11272938	11273588	651	-0.200931	hypo
chr1	11323250	11323861	612	-0.280363	hypo
chr1	11327174	11328857	1684	-0.230762	hypo
chr1	11735760	11737099	1340	-0.223226	hypo
chr1	11789872	11791275	1404	0.241289	hyper
chr1	11899570	11903664	4095	-0.286563	hypo
chr1	11983564	11985314	1751	-0.251184	hypo
chr1	11987877	11988271	395	-0.208299	hypo
chr1	11988682	11989070	389	-0.238576	hypo
chr1	11995959	11996534	576	-0.286202	hypo
chr1	12050801	12052944	2144	-0.265149	hypo
chr1	12055791	12056832	1042	-0.22506	hypo
chr1	12189428	12191109	1682	-0.222308	hypo
chr1	12192503	12193564	1062	0.244726	hyper
chr1	12230509	12231503	995	-0.257427	hypo
chr1	12291517	12292030	514	-0.216275	hypo
chr1	12418520	12419332	813	-0.250091	hypo
chr1	12584468	12584728	261	-0.218699	hypo
chr1	12585030	12585615	586	-0.302219	hypo
chr1	12585926	12586989	1064	-0.349261	hypo
chr1	12587508	12588346	839	-0.377311	hypo
chr1	12650612	12652256	1645	-0.313837	hypo
chr1	12661961	12663717	1757	-0.239683	hypo
chr1	12667945	12669022	1078	-0.211525	hypo
chr1	12673087	12674678	1592	-0.245869	hypo
chr1	12697415	12698651	1237	-0.212779	hypo
chr1	12811285	12811302	18	-0.281359	hypo
chr1	13902610	13903293	684	-0.2248	hypo
chr1	14089577	14090001	425	0.202979	hyper
chr1	14090390	14090785	396	0.268912	hyper
chr1	14694097	14695842	1746	-0.228588	hypo
chr1	15351906	15352890	985	-0.236654	hypo
chr1	15506633	15508393	1761	-0.294436	hypo
chr1	15508859	15508989	131	-0.202171	hypo
chr1	15516096	15517142	1047	-0.229608	hypo
chr1	15528093	15528739	647	-0.208441	hypo
chr1	15652395	15654247	1853	0.292992	hyper
chr1	15663140	15665098	1959	0.221507	hyper
chr1	15747303	15748494	1192	-0.323739	hypo
chr1	15885724	15886324	601	-0.332336	hypo
chr1	15900668	15901568	901	-0.255239	hypo
chr1	15902127	15902551	425	-0.21906	hypo
chr1	15909181	15910891	1711	-0.352113	hypo
chr1	15931845	15932957	1113	-0.224962	hypo
chr1	15945638	15946777	1140	-0.398651	hypo
chr1	15947212	15947388	177	-0.282111	hypo
chr1	16023135	16023964	830	0.200432	hyper
chr1	16061381	16065036	3656	-0.263446	hypo
chr1	16068998	16069926	929	-0.238403	hypo
chr1	16105825	16107638	1814	-0.304484	hypo
chr1	16158568	16159122	555	-0.315368	hypo
chr1	16171091	16171686	596	-0.409235	hypo
chr1	16171988	16173268	1281	-0.330148	hypo
chr1	16290950	16293450	2501	0.251157	hyper
chr1	16343966	16344987	1022	0.204107	hyper
chr1	16349632	16350713	1082	-0.249123	hypo
chr1	16403059	16404606	1548	-0.24471	hypo
chr1	16469629	16471098	1470	-0.204759	hypo
chr1	16504977	16506026	1050	-0.250715	hypo
chr1	16510324	16511732	1409	-0.279313	hypo
chr1	16533891	16534332	442	0.206139	hyper
chr1	16553875	16555207	1333	0.20741	hyper
chr1	16752048	16752802	755	-0.249509	hypo
chr1	16766618	16766715	98	0.200216	hyper
chr1	16826477	16826658	182	0.256033	hyper
chr1	17004633	17004788	156	0.21468	hyper
chr1	17019010	17020581	1572	0.212755	hyper
chr1	17023935	17024331	397	-0.294778	hypo
chr1	17276755	17276853	99	-0.239535	hypo
chr1	17305203	17306434	1232	0.212642	hyper
chr1	17336116	17336927	812	0.214238	hyper
chr1	17815656	17817061	1406	-0.229371	hypo
chr1	17890573	17892741	2169	-0.213149	hypo
chr1	17893079	17893900	822	-0.253569	hypo
chr1	17906589	17909321	2733	-0.34586	hypo
chr1	17909654	17910144	491	-0.310348	hypo
chr1	17917862	17918198	337	-0.287272	hypo
chr1	17918560	17921377	2818	-0.253973	hypo
chr1	18790587	18792308	1722	-0.211658	hypo
chr1	19220746	19222605	1860	-0.253933	hypo
chr1	19225194	19226319	1126	-0.210366	hypo
chr1	19226783	19228111	1329	-0.339013	hypo
chr1	19339166	19341462	2297	-0.249654	hypo
chr1	19394507	19395372	866	-0.213999	hypo
chr1	19400040	19400472	433	-0.237086	hypo
chr1	19402087	19402753	667	-0.235155	hypo
chr1	19405741	19407091	1351	-0.281061	hypo
chr1	19526929	19527110	182	-0.207697	hypo
chr1	19596161	19596472	312	-0.22968	hypo
chr1	19597342	19598551	1210	-0.32773	hypo
chr1	19599027	19600323	1297	-0.356096	hypo
chr1	19601177	19602023	847	-0.266555	hypo
chr1	19612764	19613099	336	-0.277413	hypo
chr1	19613430	19614931	1502	-0.363577	hypo
chr1	19664336	19665895	1560	-0.29876	hypo
chr1	20080107	20081514	1408	-0.257831	hypo
chr1	20140740	20142929	2190	-0.248963	hypo
chr1	20145609	20146575	967	-0.203782	hypo
chr1	20479185	20480840	1656	-0.214845	hypo
chr1	20508728	20508895	168	-0.232091	hypo
chr1	20509345	20510173	829	-0.358145	hypo
chr1	20510492	20511095	604	-0.295035	hypo
chr1	20803770	20804987	1218	-0.251327	hypo
chr1	20805755	20806028	274	-0.357109	hypo
chr1	20806550	20807757	1208	-0.242254	hypo
chr1	20929540	20931527	1988	-0.21912	hypo
chr1	20939180	20941213	2034	-0.20846	hypo
chr1	21039848	21040438	591	-0.323028	hypo
chr1	21125424	21125502	79	-0.211549	hypo
chr1	21126677	21126758	82	-0.344164	hypo
chr1	21583749	21584380	632	-0.223732	hypo
chr1	21589168	21589881	714	-0.209942	hypo
chr1	21615789	21616471	683	0.233804	hyper
chr1	21662909	21664617	1709	-0.223568	hypo
chr1	21711803	21711843	41	0.203243	hyper
chr1	21872684	21874207	1524	-0.258688	hypo
chr1	21876029	21876865	837	-0.261259	hypo
chr1	21877183	21877843	661	-0.362487	hypo
chr1	21878149	21878179	31	-0.325866	hypo
chr1	21878513	21878704	192	-0.255462	hypo
chr1	21895744	21897887	2144	-0.227639	hypo
chr1	21944994	21946313	1320	0.20166	hyper
chr1	21978863	21979736	874	0.225163	hyper
chr1	22235397	22235661	265	0.231868	hyper
chr1	22236251	22237438	1188	0.26837	hyper
chr1	22260104	22260751	648	0.243161	hyper
chr1	22262238	22262784	547	0.242561	hyper
chr1	22269141	22270004	864	0.243949	hyper
chr1	22416311	22417012	702	0.221825	hyper
chr1	22583402	22583837	436	-0.230522	hypo
chr1	23070266	23073200	2935	-0.21236	hypo
chr1	23476601	23478235	1635	-0.206512	hypo
chr1	23797899	23799735	1837	-0.213056	hypo
chr1	23883338	23883887	550	0.220331	hyper
chr1	23884322	23884483	162	0.26435	hyper
chr1	23887050	23888321	1272	0.286786	hyper
chr1	24072500	24073344	845	-0.224621	hypo
chr1	24099465	24099748	284	-0.218604	hypo
chr1	24128335	24129185	851	-0.211535	hypo
chr1	24150134	24151086	953	-0.340289	hypo
chr1	24153136	24153558	423	-0.265941	hypo
chr1	24377262	24378670	1409	0.212435	hyper
chr1	24509853	24510072	220	-0.23618	hypo
chr1	24510462	24511230	769	-0.246512	hypo
chr1	24511662	24513036	1375	-0.235108	hypo
chr1	24743181	24744306	1126	0.219596	hyper
chr1	24744940	24746400	1461	0.218523	hyper
chr1	24866104	24867048	945	-0.219493	hypo
chr1	24932030	24933688	1659	-0.263202	hypo
chr1	25043082	25045560	2479	-0.247695	hypo
chr1	25056933	25057750	818	0.223423	hyper
chr1	25105698	25106257	560	-0.220878	hypo
chr1	25110972	25111271	300	-0.306974	hypo
chr1	25112070	25112082	13	-0.340152	hypo
chr1	25113089	25113398	310	-0.236654	hypo
chr1	25200281	25202106	1826	0.247247	hyper
chr1	25751811	25752788	978	-0.23361	hypo
chr1	25784986	25787466	2481	-0.272812	hypo
chr1	25809784	25810800	1017	-0.231394	hypo
chr1	25917091	25917639	549	0.215086	hyper
chr1	26099874	26100081	208	-0.210289	hypo
chr1	26193501	26193931	431	-0.264938	hypo
chr1	26197063	26197525	463	-0.217288	hypo
chr1	26199754	26199812	59	-0.231873	hypo
chr1	26440789	26441166	378	-0.260831	hypo
chr1	26552454	26553169	716	-0.269308	hypo
chr1	27106327	27108561	2235	-0.291086	hypo
chr1	27120658	27121680	1023	-0.218911	hypo
chr1	27134231	27134513	283	-0.210647	hypo
chr1	27136032	27136315	284	-0.290488	hypo
chr1	27236574	27237147	574	-0.268009	hypo
chr1	27237680	27238036	357	-0.321085	hypo
chr1	27238371	27239179	809	-0.326712	hypo
chr1	27239900	27240812	913	-0.253927	hypo
chr1	27263213	27264647	1435	-0.296587	hypo
chr1	27265043	27266144	1102	-0.340381	hypo
chr1	27270349	27271207	859	-0.318619	hypo
chr1	27271905	27273064	1160	-0.394708	hypo
chr1	27274119	27275784	1666	-0.328261	hypo
chr1	27292253	27292486	234	-0.287244	hypo
chr1	27392008	27392269	262	-0.218919	hypo
chr1	27444413	27446347	1935	0.209092	hyper
chr1	27668816	27670663	1848	0.245883	hyper
chr1	27693782	27694970	1189	0.223387	hyper
chr1	27695274	27695290	17	0.205061	hyper
chr1	27754007	27754368	362	0.207503	hyper
chr1	27754779	27755395	617	0.235701	hyper
chr1	27755803	27757498	1696	0.216966	hyper
chr1	27851536	27853763	2228	0.233323	hyper
chr1	27888338	27890288	1951	-0.212988	hypo
chr1	28571066	28571927	862	-0.261888	hypo
chr1	28577967	28578428	462	-0.317206	hypo
chr1	28578827	28578969	143	-0.304603	hypo
chr1	28587439	28588100	662	-0.374595	hypo
chr1	28588568	28590698	2131	-0.324021	hypo
chr1	28606810	28610055	3246	-0.291946	hypo
chr1	28648559	28649925	1367	-0.215485	hypo
chr1	29198299	29199401	1103	-0.225961	hypo
chr1	29254660	29255107	448	0.266879	hyper
chr1	29472133	29473286	1154	-0.317168	hypo
chr1	29475295	29475923	629	-0.354191	hypo
chr1	29509335	29509619	285	-0.207699	hypo
chr1	29586914	29587490	577	0.207648	hyper
chr1	29630662	29631004	343	-0.26229	hypo
chr1	31136147	31136990	844	-0.215425	hypo
chr1	31137313	31138183	871	-0.217892	hypo
chr1	31423023	31423636	614	-0.263666	hypo
chr1	31424131	31425296	1166	-0.249923	hypo
chr1	31520581	31520606	26	-0.225278	hypo
chr1	31525584	31526707	1124	-0.241577	hypo
chr1	31535191	31535207	17	-0.200057	hypo
chr1	31889943	31890544	602	-0.207963	hypo
chr1	31903126	31903731	606	-0.209819	hypo
chr1	32404659	32406433	1775	-0.211606	hypo
chr1	32560406	32561291	886	-0.406165	hypo
chr1	32561600	32561612	13	-0.268199	hypo
chr1	32641675	32643007	1333	-0.244662	hypo
chr1	32643901	32644183	283	-0.335204	hypo
chr1	32775824	32776444	621	-0.218341	hypo
chr1	33166886	33167952	1067	0.213518	hyper
chr1	33190057	33191811	1755	0.205506	hyper
chr1	33203135	33203327	193	-0.256211	hypo
chr1	33329732	33331334	1603	-0.286382	hypo
chr1	33335038	33335846	809	-0.230937	hypo
chr1	33360653	33361852	1200	-0.233502	hypo
chr1	33400722	33401920	1199	-0.249515	hypo
chr1	33402454	33403202	749	-0.212932	hypo
chr1	33487059	33488107	1049	-0.249915	hypo
chr1	33489499	33489878	380	-0.204105	hypo
chr1	33491862	33492691	830	-0.203654	hypo
chr1	33565018	33565804	787	0.208099	hyper
chr1	33762267	33762738	472	-0.355762	hypo
chr1	34019333	34019442	110	-0.226874	hypo
chr1	34020070	34020363	294	-0.224684	hypo
chr1	35637492	35638147	656	-0.203611	hypo
chr1	35661354	35661778	425	-0.229129	hypo
chr1	35767239	35768277	1039	-0.252869	hypo
chr1	35873322	35873695	374	-0.280256	hypo
chr1	36488258	36488517	260	-0.280455	hypo
chr1	36623073	36623381	309	0.308784	hyper
chr1	36623755	36624397	643	0.261763	hyper
chr1	36625957	36628032	2076	0.246224	hyper
chr1	36648066	36649007	942	0.262061	hyper
chr1	36717748	36718474	727	-0.260559	hypo
chr1	36733769	36734978	1210	-0.330394	hypo
chr1	36735398	36735949	552	-0.251816	hypo
chr1	36785787	36786650	864	0.211796	hyper
chr1	36788060	36788479	420	0.211165	hyper
chr1	36790032	36790373	342	0.244158	hyper
chr1	36845754	36845931	178	-0.222695	hypo
chr1	36947007	36949065	2059	0.221807	hyper
chr1	37983531	37983729	199	-0.281014	hypo
chr1	38405859	38406456	598	-0.279116	hypo
chr1	38444208	38444629	422	-0.252479	hypo
chr1	38460748	38461445	698	0.223263	hyper
chr1	38583162	38584117	956	-0.278411	hypo
chr1	38922635	38923082	448	-0.226048	hypo
chr1	38923387	38923456	70	-0.234142	hypo
chr1	38976248	38977326	1079	-0.213872	hypo
chr1	39218513	39219043	531	-0.209161	hypo
chr1	39451869	39452153	285	-0.235337	hypo
chr1	39541732	39542620	889	-0.220405	hypo
chr1	39852381	39852996	616	-0.242593	hypo
chr1	40317294	40317520	227	-0.206457	hypo
chr1	40388353	40388967	615	-0.251925	hypo
chr1	40394049	40396158	2110	-0.293405	hypo
chr1	40422019	40423157	1139	-0.227357	hypo
chr1	40427298	40428205	908	-0.283506	hypo
chr1	40438047	40439128	1082	-0.221294	hypo
chr1	40739498	40740186	689	-0.20841	hypo
chr1	40841653	40841932	280	-0.255674	hypo
chr1	40848820	40849232	413	-0.270034	hypo
chr1	40850341	40850684	344	-0.220238	hypo
chr1	40856541	40857424	884	-0.235168	hypo
chr1	40885947	40886696	750	-0.213893	hypo
chr1	40887040	40887988	949	-0.215589	hypo
chr1	40998264	40998455	192	-0.216281	hypo
chr1	41001721	41002052	332	-0.200355	hypo
chr1	41195370	41196130	761	-0.20889	hypo
chr1	41213797	41214303	507	-0.252445	hypo
chr1	41215038	41215854	817	-0.330762	hypo
chr1	41222892	41223945	1054	-0.246982	hypo
chr1	41224386	41225504	1119	-0.232746	hypo
chr1	41289941	41291836	1896	0.204882	hyper
chr1	41404657	41405748	1092	-0.230703	hypo
chr1	41410709	41411054	346	-0.203389	hypo
chr1	41452526	41455441	2916	-0.350035	hypo
chr1	41456290	41456596	307	-0.27894	hypo
chr1	41621209	41622758	1550	-0.220726	hypo
chr1	43319261	43319453	193	-0.23508	hypo
chr1	43397051	43398620	1570	0.240149	hyper
chr1	43406035	43409561	3527	0.269991	hyper
chr1	43472868	43474043	1176	-0.201386	hypo
chr1	43700781	43702318	1538	-0.235845	hypo
chr1	43713410	43713726	317	-0.416893	hypo
chr1	43714057	43714286	230	-0.455413	hypo
chr1	43714816	43714860	45	-0.48182	hypo
chr1	43715249	43715407	159	-0.47541	hypo
chr1	43716378	43716992	615	-0.313576	hypo
chr1	43741905	43745348	3444	-0.256825	hypo
chr1	43777349	43780269	2921	-0.296541	hypo
chr1	43913317	43914926	1610	-0.296691	hypo
chr1	44009086	44011712	2627	-0.221484	hypo
chr1	44012788	44014935	2148	-0.269017	hypo
chr1	44443118	44444448	1331	-0.317733	hypo
chr1	44749596	44749902	307	-0.202853	hypo
chr1	44764308	44764714	407	-0.214263	hypo
chr1	45110329	45111549	1221	-0.258048	hypo
chr1	45115791	45116962	1172	-0.226083	hypo
chr1	45126995	45127172	178	-0.222235	hypo
chr1	45127497	45128828	1332	-0.232467	hypo
chr1	45144302	45144806	505	-0.270612	hypo
chr1	45145258	45145500	243	-0.271979	hypo
chr1	45278108	45279132	1025	-0.295088	hypo
chr1	45865373	45866684	1312	-0.225422	hypo
chr1	45910369	45911176	808	-0.235197	hypo
chr1	45966524	45966947	424	-0.288223	hypo
chr1	45968161	45968797	637	-0.228075	hypo
chr1	45969210	45970289	1080	-0.263251	hypo
chr1	45973071	45973211	141	-0.214251	hypo
chr1	45984920	45985653	734	-0.304731	hypo
chr1	46008348	46008912	565	-0.217721	hypo
chr1	46022816	46023285	470	-0.228114	hypo
chr1	46148937	46150233	1297	-0.214008	hypo
chr1	46270752	46271970	1219	-0.265001	hypo
chr1	46440995	46441446	452	-0.217899	hypo
chr1	46599370	46599465	96	0.281472	hyper
chr1	46632141	46632433	293	0.213695	hyper
chr1	46661421	46661945	525	-0.211037	hypo
chr1	46664598	46665125	528	-0.266507	hypo
chr1	46669124	46671189	2066	0.237931	hyper
chr1	47079074	47079776	703	0.245035	hyper
chr1	47490062	47490441	380	0.213755	hyper
chr1	47801036	47801287	252	-0.244379	hypo
chr1	47805971	47806555	585	-0.201797	hypo
chr1	48025363	48026504	1142	-0.201485	hypo
chr1	48216563	48218623	2061	0.246849	hyper
chr1	48378134	48379328	1195	-0.231434	hypo
chr1	48428627	48428832	206	-0.226392	hypo
chr1	48435065	48435780	716	-0.222001	hypo
chr1	48436205	48437298	1094	-0.223098	hypo
chr1	48452200	48452897	698	0.248934	hyper
chr1	48687359	48687524	166	-0.257683	hypo
chr1	48687989	48689681	1693	-0.220463	hypo
chr1	48936272	48936694	423	0.217384	hyper
chr1	49145094	49147431	2338	-0.224897	hypo
chr1	49383680	49384476	797	-0.20204	hypo
chr1	51165759	51166032	274	0.208746	hyper
chr1	51444462	51445038	577	-0.246196	hypo
chr1	51682098	51682260	163	-0.321003	hypo
chr1	51683035	51683539	505	-0.246216	hypo
chr1	51753207	51755118	1912	-0.222961	hypo
chr1	52156482	52156761	280	-0.323836	hypo
chr1	52157140	52157247	108	-0.311783	hypo
chr1	52157770	52158161	392	-0.260963	hypo
chr1	52422353	52422674	322	0.263431	hyper
chr1	52434901	52435408	508	-0.201041	hypo
chr1	52443218	52443409	192	-0.220055	hypo
chr1	52971383	52972043	661	-0.245737	hypo
chr1	53016235	53016446	212	-0.327085	hypo
chr1	53193793	53194221	429	-0.282778	hypo
chr1	53204011	53204577	567	-0.219338	hypo
chr1	53211562	53211922	361	-0.331491	hypo
chr1	53214300	53214610	311	-0.274049	hypo
chr1	53215113	53216013	901	-0.274227	hypo
chr1	53307686	53307933	248	-0.241128	hypo
chr1	53371064	53372971	1908	-0.350788	hypo
chr1	53373334	53373491	158	-0.259595	hypo
chr1	53378028	53379403	1376	-0.384383	hypo
chr1	53391823	53392492	670	-0.43493	hypo
chr1	53394142	53394981	840	-0.386878	hypo
chr1	53395546	53395630	85	-0.352275	hypo
chr1	53395946	53396399	454	-0.307464	hypo
chr1	53436041	53436454	414	-0.23186	hypo
chr1	53648734	53649255	522	-0.251466	hypo
chr1	53655939	53656516	578	-0.291209	hypo
chr1	53657041	53657415	375	-0.263777	hypo
chr1	53659247	53659328	82	-0.218233	hypo
chr1	53660822	53661766	945	-0.333526	hypo
chr1	53663981	53664129	149	-0.213101	hypo
chr1	54349434	54349856	423	-0.259855	hypo
chr1	54351037	54351486	450	-0.233867	hypo
chr1	54359778	54360178	401	-0.29684	hypo
chr1	54360558	54362142	1585	-0.34008	hypo
chr1	54362877	54365068	2192	-0.280548	hypo
chr1	54365413	54366014	602	-0.251241	hypo
chr1	54431601	54432613	1013	-0.27195	hypo
chr1	54433096	54433465	370	-0.339479	hypo
chr1	54738076	54740434	2359	-0.265122	hypo
chr1	54742715	54743092	378	-0.286483	hypo
chr1	54743414	54743776	363	-0.310979	hypo
chr1	54744093	54744248	156	-0.252292	hypo
chr1	54748004	54748689	686	-0.20206	hypo
chr1	54763692	54765392	1701	0.207404	hyper
chr1	55008379	55009144	766	0.204699	hyper
chr1	55046826	55048812	1987	-0.206687	hypo
chr1	55113112	55113171	60	-0.234871	hypo
chr1	55113836	55114068	233	-0.246619	hypo
chr1	55115097	55115471	375	-0.262405	hypo
chr1	55116389	55117627	1239	-0.233342	hypo
chr1	55246981	55247842	862	0.254052	hyper
chr1	55269264	55269897	634	-0.21233	hypo
chr1	55312156	55313160	1005	-0.228574	hypo
chr1	55322822	55323192	371	-0.311242	hypo
chr1	55323503	55323837	335	-0.286665	hypo
chr1	55336950	55337598	649	-0.309099	hypo
chr1	55348861	55350020	1160	-0.24952	hypo
chr1	55350823	55351619	797	-0.256944	hypo
chr1	55498896	55500160	1265	-0.247483	hypo
chr1	55503981	55504790	810	-0.230785	hypo
chr1	55507465	55508184	720	-0.200737	hypo
chr1	55514782	55516279	1498	-0.21081	hypo
chr1	55518092	55520216	2125	-0.301241	hypo
chr1	56304748	56304928	181	-0.201309	hypo
chr1	56795528	56795754	227	-0.225705	hypo
chr1	56797332	56798402	1071	-0.273059	hypo
chr1	56800069	56800183	115	-0.20507	hypo
chr1	56879406	56880116	711	-0.247998	hypo
chr1	56897233	56897456	224	-0.220027	hypo
chr1	56897797	56899323	1527	-0.217423	hypo
chr1	56918676	56919329	654	-0.250907	hypo
chr1	56925893	56926224	332	-0.259221	hypo
chr1	56926628	56926659	32	-0.311033	hypo
chr1	56926991	56927238	248	-0.292028	hypo
chr1	56927555	56928117	563	-0.217214	hypo
chr1	56944971	56944977	7	-0.203316	hypo
chr1	56973919	56976145	2227	-0.276413	hypo
chr1	57008421	57008619	199	-0.265991	hypo
chr1	57009304	57009542	239	-0.319456	hypo
chr1	57011141	57011860	720	-0.346206	hypo
chr1	57030820	57031011	192	-0.264221	hypo
chr1	57031385	57031907	523	-0.250925	hypo
chr1	57239817	57240350	534	-0.22789	hypo
chr1	57283544	57283864	321	-0.23374	hypo
chr1	57284180	57286560	2381	-0.220883	hypo
chr1	57320305	57320685	381	-0.243996	hypo
chr1	57371472	57372829	1358	-0.300706	hypo
chr1	57373670	57373817	148	-0.335806	hypo
chr1	57375543	57375659	117	-0.309516	hypo
chr1	57376060	57376519	460	-0.277706	hypo
chr1	57427826	57427999	174	-0.255416	hypo
chr1	57428717	57430907	2191	-0.394602	hypo
chr1	57431425	57431589	165	-0.440644	hypo
chr1	57432749	57432979	231	-0.252834	hypo
chr1	57498168	57499692	1525	-0.302963	hypo
chr1	57694988	57695163	176	-0.207091	hypo
chr1	57697058	57697250	193	-0.215573	hypo
chr1	57700619	57700733	115	-0.279399	hypo
chr1	57701072	57702559	1488	-0.22323	hypo
chr1	57736710	57737357	648	-0.200987	hypo
chr1	57743872	57745175	1304	-0.317607	hypo
chr1	57746168	57746363	196	-0.349217	hypo
chr1	57747116	57748036	921	-0.32214	hypo
chr1	58619465	58620021	557	-0.21017	hypo
chr1	58910754	58911910	1157	-0.247339	hypo
chr1	58913283	58913596	314	-0.236715	hypo
chr1	58917274	58918256	983	-0.251213	hypo
chr1	59153385	59153609	225	-0.276108	hypo
chr1	59255030	59255376	347	0.202638	hyper
chr1	59279841	59280550	710	0.239956	hyper
chr1	59339127	59339850	724	0.21561	hyper
chr1	59340515	59342125	1611	0.266357	hyper
chr1	59361426	59362552	1127	0.274228	hyper
chr1	59362893	59363346	454	0.266295	hyper
chr1	59364863	59365912	1050	0.205631	hyper
chr1	59366223	59366249	27	0.220528	hyper
chr1	59478696	59479789	1094	0.237504	hyper
chr1	59549675	59550124	450	0.208652	hyper
chr1	59763481	59763875	395	-0.304488	hypo
chr1	59775104	59775373	270	-0.243995	hypo
chr1	59775764	59775908	145	-0.28865	hypo
chr1	59776231	59776385	155	-0.317944	hypo
chr1	59810335	59810982	648	-0.24399	hypo
chr1	59811493	59812161	669	-0.29587	hypo
chr1	59943745	59943934	190	-0.237663	hypo
chr1	59944987	59946178	1192	-0.244446	hypo
chr1	59977562	59978144	583	-0.208976	hypo
chr1	60058821	60059194	374	-0.231789	hypo
chr1	60059846	60060239	394	-0.21004	hypo
chr1	60402042	60402430	389	-0.292685	hypo
chr1	60403952	60403983	32	-0.288836	hypo
chr1	60404891	60405876	986	-0.23176	hypo
chr1	60740354	60741127	774	-0.212979	hypo
chr1	61293501	61293629	129	-0.219612	hypo
chr1	61294311	61294776	466	-0.250043	hypo
chr1	61295184	61295238	55	-0.255889	hypo
chr1	61295611	61295927	317	-0.244026	hypo
chr1	61586113	61586570	458	-0.264038	hypo
chr1	61678782	61679909	1128	-0.278186	hypo
chr1	61681575	61682017	443	-0.373392	hypo
chr1	61696142	61696520	379	-0.287818	hypo
chr1	62196812	62196906	95	-0.220905	hypo
chr1	62438867	62439851	985	-0.266575	hypo
chr1	62440188	62440289	102	-0.210377	hypo
chr1	62905801	62905882	82	-0.212972	hypo
chr1	62993822	62993961	140	-0.311443	hypo
chr1	62995019	62995048	30	-0.302409	hypo
chr1	62996380	62996854	475	-0.234404	hypo
chr1	63064935	63065064	130	-0.390017	hypo
chr1	63600768	63601350	583	-0.242631	hypo
chr1	63953362	63953672	311	0.250259	hyper
chr1	64057204	64057630	427	-0.255509	hypo
chr1	64107040	64108307	1268	-0.219319	hypo
chr1	64108688	64108974	287	-0.209295	hypo
chr1	64937285	64938825	1541	0.230015	hyper
chr1	64939240	64939473	234	0.210018	hyper
chr1	65061262	65062243	982	0.210506	hyper
chr1	65212105	65212394	290	0.307622	hyper
chr1	65573629	65574416	788	-0.21217	hypo
chr1	65574830	65575335	506	-0.200624	hypo
chr1	65609407	65609915	509	-0.208119	hypo
chr1	65616222	65617059	838	-0.222245	hypo
chr1	65634223	65634419	197	-0.312927	hypo
chr1	65634734	65635114	381	-0.374537	hypo
chr1	65635563	65636237	675	-0.322908	hypo
chr1	65664380	65665230	851	-0.269169	hypo
chr1	65666077	65667385	1309	-0.374553	hypo
chr1	65667802	65668074	273	-0.26893	hypo
chr1	65673896	65674527	632	-0.265881	hypo
chr1	65992119	65992383	265	-0.227352	hypo
chr1	66733446	66733485	40	0.203815	hyper
chr1	66998373	66998850	478	0.21339	hyper
chr1	67516893	67517114	222	-0.317196	hypo
chr1	67986630	67987231	602	-0.319778	hypo
chr1	67987549	67987624	76	-0.373827	hypo
chr1	67987989	67988848	860	-0.382998	hypo
chr1	67994647	67995005	359	-0.27512	hypo
chr1	67995320	67995580	261	-0.278542	hypo
chr1	68023420	68024771	1352	-0.245993	hypo
chr1	68026095	68026576	482	-0.212958	hypo
chr1	68036245	68036721	477	-0.227929	hypo
chr1	68037570	68038265	696	-0.222423	hypo
chr1	68042160	68044099	1940	-0.241577	hypo
chr1	68045137	68045402	266	-0.203289	hypo
chr1	68097388	68097589	202	-0.296333	hypo
chr1	68097997	68099821	1825	-0.335869	hypo
chr1	68100181	68100612	432	-0.269055	hypo
chr1	68642919	68643468	550	0.213647	hyper
chr1	70805291	70805410	120	-0.208846	hypo
chr1	70879613	70880377	765	-0.216439	hypo
chr1	72203464	72203914	451	-0.229603	hypo
chr1	72204242	72204510	269	-0.229125	hypo
chr1	72597505	72597901	397	-0.238241	hypo
chr1	72699756	72700038	283	-0.213407	hypo
chr1	72700863	72701099	237	-0.247728	hypo
chr1	73544755	73545031	277	-0.22059	hypo
chr1	73926589	73926670	82	-0.205555	hypo
chr1	74005124	74005592	469	-0.212812	hypo
chr1	74132883	74133019	137	-0.239481	hypo
chr1	74691901	74692068	168	-0.218819	hypo
chr1	75194534	75195146	613	-0.216733	hypo
chr1	75196073	75196552	480	-0.289882	hypo
chr1	75815764	75815918	155	-0.209715	hypo
chr1	76129592	76129955	364	-0.204498	hypo
chr1	76130327	76130600	274	-0.206278	hypo
chr1	76191391	76192512	1122	-0.274801	hypo
chr1	76571147	76571574	428	-0.213354	hypo
chr1	76572148	76572603	456	-0.211953	hypo
chr1	76661940	76662626	687	-0.250131	hypo
chr1	76909122	76909146	25	-0.234416	hypo
chr1	77022941	77023102	162	-0.206904	hypo
chr1	77436925	77437089	165	-0.236525	hypo
chr1	77437422	77438225	804	-0.226095	hypo
chr1	78207964	78208004	41	-0.220221	hypo
chr1	78223896	78224148	253	-0.376726	hypo
chr1	78512553	78513362	810	-0.240073	hypo
chr1	78689109	78689701	593	-0.201195	hypo
chr1	78691010	78691118	109	-0.226939	hypo
chr1	78691555	78691951	397	-0.227449	hypo
chr1	78692530	78692814	285	-0.216318	hypo
chr1	78939092	78939628	537	-0.204333	hypo
chr1	78940435	78940557	123	-0.202243	hypo
chr1	79411849	79412073	225	-0.250621	hypo
chr1	79412975	79413175	201	-0.259432	hypo
chr1	79468551	79468842	292	-0.288292	hypo
chr1	79648259	79648427	169	-0.226298	hypo
chr1	79649439	79649621	183	-0.210971	hypo
chr1	82415104	82415360	257	0.202373	hyper
chr1	83333505	83334290	786	0.2413	hyper
chr1	85184650	85186083	1434	-0.206079	hypo
chr1	85190178	85191250	1073	-0.208795	hypo
chr1	85327382	85328095	714	-0.245653	hypo
chr1	85355171	85355904	734	-0.224809	hypo
chr1	86044103	86044637	535	0.238988	hyper
chr1	86047778	86049073	1296	0.207805	hyper
chr1	86049654	86050405	752	0.203904	hyper
chr1	86651530	86652012	483	-0.213692	hypo
chr1	86653014	86653172	159	-0.212081	hypo
chr1	87169064	87169624	561	0.227638	hyper
chr1	87325032	87325931	900	-0.220759	hypo
chr1	89003441	89004079	639	-0.248077	hypo
chr1	89006962	89007428	467	-0.209976	hypo
chr1	89484606	89485003	398	0.221627	hyper
chr1	89637627	89638097	471	-0.256089	hypo
chr1	89639637	89640418	782	-0.363856	hypo
chr1	89640979	89641171	193	-0.357737	hypo
chr1	89642561	89642709	149	-0.260119	hypo
chr1	90184627	90185533	907	0.316963	hyper
chr1	90299624	90300627	1004	-0.260645	hypo
chr1	90301352	90301429	78	-0.343597	hypo
chr1	90302001	90302493	493	-0.365898	hypo
chr1	90303656	90303802	147	-0.286637	hypo
chr1	90306829	90307816	988	-0.240865	hypo
chr1	90309779	90309998	220	-0.210356	hypo
chr1	90336891	90336960	70	-0.283214	hypo
chr1	90337720	90338129	410	-0.270155	hypo
chr1	90367204	90368704	1501	-0.265768	hypo
chr1	90587890	90588621	732	-0.212502	hypo
chr1	90589023	90589288	266	-0.261164	hypo
chr1	90589809	90590749	941	-0.269058	hypo
chr1	90591480	90591666	187	-0.217995	hypo
chr1	91299181	91302378	3198	0.316304	hyper
chr1	91305736	91307482	1747	0.21729	hyper
chr1	91587646	91587806	161	-0.231977	hypo
chr1	92035041	92036363	1323	0.224935	hyper
chr1	92223655	92223939	285	-0.22774	hypo
chr1	92242186	92242617	432	-0.220373	hypo
chr1	93176491	93176598	108	-0.20615	hypo
chr1	93179432	93179767	336	-0.357257	hypo
chr1	93180855	93181044	190	-0.30524	hypo
chr1	93181507	93181529	23	-0.248945	hypo
chr1	93400465	93400792	328	-0.219299	hypo
chr1	93401138	93401599	462	-0.262548	hypo
chr1	93401922	93402280	359	-0.275703	hypo
chr1	93402788	93403062	275	-0.253625	hypo
chr1	93424660	93425751	1092	-0.231072	hypo
chr1	93508206	93508748	543	-0.231716	hypo
chr1	93670714	93670795	82	-0.208831	hypo
chr1	93964821	93965033	213	-0.215298	hypo
chr1	93969820	93970234	415	0.26071	hyper
chr1	93970729	93970798	70	0.281608	hyper
chr1	94018393	94018955	563	0.22091	hyper
chr1	94049982	94051420	1439	-0.247688	hypo
chr1	94057053	94059381	2329	-0.266002	hypo
chr1	94079426	94081289	1864	-0.219501	hypo
chr1	94082789	94084476	1688	-0.238486	hypo
chr1	94157417	94158637	1221	0.21211	hyper
chr1	94428430	94428757	328	-0.202852	hypo
chr1	94429147	94429973	827	-0.231047	hypo
chr1	94430439	94431058	620	-0.218661	hypo
chr1	94513806	94514561	756	0.263106	hyper
chr1	94514956	94515585	630	0.265611	hyper
chr1	94559714	94560937	1224	0.228893	hyper
chr1	94580825	94582292	1468	-0.204611	hypo
chr1	94845474	94845551	78	-0.208109	hypo
chr1	94882585	94882930	346	-0.201118	hypo
chr1	94885111	94885396	286	-0.263739	hypo
chr1	94887751	94888503	753	-0.281559	hypo
chr1	95009110	95009202	93	0.323833	hyper
chr1	95468367	95468606	240	0.205918	hyper
chr1	95532966	95533576	611	-0.255401	hypo
chr1	95534547	95534811	265	-0.243724	hypo
chr1	95584264	95584507	244	-0.485018	hypo
chr1	95585610	95588009	2400	-0.364008	hypo
chr1	95598627	95599133	507	-0.24043	hypo
chr1	95599647	95599803	157	-0.245529	hypo
chr1	95697689	95698439	751	-0.319544	hypo
chr1	97257668	97258071	404	-0.242918	hypo
chr1	97704519	97704554	36	-0.228108	hypo
chr1	97706888	97707068	181	-0.251325	hypo
chr1	97966492	97966678	187	-0.249268	hypo
chr1	97966991	97967339	349	-0.232144	hypo
chr1	98509738	98510664	927	0.231027	hyper
chr1	98518424	98518831	408	0.203773	hyper
chr1	100113127	100113529	403	-0.200214	hypo
chr1	100113903	100113934	32	-0.235863	hypo
chr1	100226236	100226962	727	-0.203862	hypo
chr1	100228317	100228667	351	-0.230779	hypo
chr1	100229019	100229150	132	-0.242992	hypo
chr1	100230883	100230923	41	-0.249402	hypo
chr1	100317821	100318221	401	-0.243358	hypo
chr1	100325166	100325377	212	-0.252879	hypo
chr1	100326338	100326491	154	-0.260228	hypo
chr1	100335491	100335651	161	-0.205556	hypo
chr1	100336605	100336919	315	-0.225609	hypo
chr1	100654018	100654874	857	-0.217114	hypo
chr1	100819209	100819516	308	0.20197	hyper
chr1	100852459	100852995	537	0.23125	hyper
chr1	101003337	101004053	717	0.257586	hyper
chr1	101079913	101080511	599	-0.200143	hypo
chr1	101081017	101081984	968	-0.239788	hypo
chr1	101657465	101658339	875	-0.23194	hypo
chr1	101659350	101659745	396	-0.204288	hypo
chr1	101684671	101685097	427	-0.213313	hypo
chr1	101704933	101706269	1337	0.202014	hyper
chr1	102252855	102253064	210	-0.27867	hypo
chr1	102253783	102253987	205	-0.255808	hypo
chr1	102504161	102504623	463	-0.230961	hypo
chr1	102506964	102507071	108	-0.214526	hypo
chr1	102553773	102553974	202	-0.268867	hypo
chr1	102556061	102556798	738	-0.256393	hypo
chr1	103424559	103424618	60	-0.21154	hypo
chr1	104981420	104981840	421	-0.261698	hypo
chr1	104982161	104982316	156	-0.270131	hypo
chr1	105703565	105703678	114	-0.200093	hypo
chr1	106624193	106624303	111	-0.280119	hypo
chr1	106659544	106659777	234	-0.206297	hypo
chr1	106845528	106845657	130	-0.239826	hypo
chr1	107227572	107228495	924	-0.223844	hypo
chr1	107463155	107463585	431	-0.200512	hypo
chr1	108349705	108349848	144	-0.273854	hypo
chr1	108663923	108665930	2008	-0.201033	hypo
chr1	108882902	108883285	384	-0.201116	hypo
chr1	109103684	109103731	48	0.24864	hyper
chr1	109372376	109373698	1323	0.227021	hyper
chr1	109420722	109420999	278	0.227744	hyper
chr1	109582905	109583379	475	0.209879	hyper
chr1	109727351	109729166	1816	0.201816	hyper
chr1	109849328	109850837	1510	0.204109	hyper
chr1	110128869	110129245	377	-0.236543	hypo
chr1	110130728	110130960	233	-0.217982	hypo
chr1	110161285	110161942	658	-0.283188	hypo
chr1	110199310	110199678	369	-0.224312	hypo
chr1	110478271	110479095	825	-0.267341	hypo
chr1	110502575	110503432	858	-0.226257	hypo
chr1	110504302	110505134	833	-0.227681	hypo
chr1	110551404	110552123	720	-0.297584	hypo
chr1	110552775	110552990	216	-0.280175	hypo
chr1	110553707	110554108	402	-0.217161	hypo
chr1	110877714	110877913	200	-0.204581	hypo
chr1	111302458	111303100	643	-0.208498	hypo
chr1	111810576	111810970	395	-0.271101	hypo
chr1	112048786	112049426	641	0.211203	hyper
chr1	112051437	112052354	918	-0.250921	hypo
chr1	112057875	112059809	1935	0.246339	hyper
chr1	112077949	112078791	843	-0.226778	hypo
chr1	112079111	112079418	308	-0.212272	hypo
chr1	112429435	112430366	932	-0.241359	hypo
chr1	112430790	112431078	289	-0.206594	hypo
chr1	113250386	113251504	1119	0.232898	hyper
chr1	113546163	113547452	1290	-0.285041	hypo
chr1	113556786	113557783	998	-0.239078	hypo
chr1	113569183	113569928	746	-0.329742	hypo
chr1	113570665	113571302	638	-0.359464	hypo
chr1	113571835	113572403	569	-0.218126	hypo
chr1	115129450	115129479	30	-0.279006	hypo
chr1	115129878	115130729	852	-0.35001	hypo
chr1	115131796	115131846	51	-0.267729	hypo
chr1	115263191	115263336	146	-0.211213	hypo
chr1	115263750	115264799	1050	-0.206052	hypo
chr1	116665745	116666936	1192	-0.263602	hypo
chr1	116695347	116695962	616	-0.356893	hypo
chr1	116878591	116880589	1999	-0.213191	hypo
chr1	117035963	117037129	1167	-0.241364	hypo
chr1	117523933	117524366	434	-0.208102	hypo
chr1	117593269	117594286	1018	0.210982	hyper
chr1	118069879	118070189	311	-0.210411	hypo
chr1	118473631	118473981	351	-0.310533	hypo
chr1	118550310	118550444	135	-0.251525	hypo
chr1	118550747	118550819	73	-0.257007	hypo
chr1	119502537	119504026	1490	-0.207471	hypo
chr1	119506379	119506583	205	-0.214869	hypo
chr1	119867065	119867996	932	-0.346228	hypo
chr1	119868681	119869526	846	-0.368471	hypo
chr1	119871279	119871824	546	-0.306804	hypo
chr1	119872303	119873909	1607	-0.294878	hypo
chr1	119881582	119881951	370	-0.290051	hypo
chr1	119882391	119882662	272	-0.296716	hypo
chr1	119884412	119884543	132	-0.297041	hypo
chr1	119910132	119910690	559	-0.257156	hypo
chr1	119911000	119911110	111	-0.285798	hypo
chr1	119911452	119912909	1458	-0.295683	hypo
chr1	120082695	120083098	404	-0.208388	hypo
chr1	120083667	120084920	1254	-0.203014	hypo
chr1	120148425	120148952	528	0.21466	hyper
chr1	120149343	120149795	453	0.261043	hyper
chr1	120150993	120151269	277	0.238289	hyper
chr1	120255845	120256272	428	-0.218177	hypo
chr1	120256620	120257601	982	-0.210321	hypo
chr1	120273097	120273369	273	-0.20457	hypo
chr1	120273819	120274218	400	-0.205544	hypo
chr1	120288316	120288644	329	-0.267972	hypo
chr1	120289001	120289984	984	-0.242427	hypo
chr1	120306780	120307194	415	-0.340047	hypo
chr1	120307966	120308014	49	-0.319991	hypo
chr1	120308629	120309529	901	-0.288128	hypo
chr1	120435546	120436409	864	-0.213324	hypo
chr1	120436876	120438036	1161	-0.249842	hypo
chr1	120504641	120505126	486	-0.24146	hypo
chr1	120505553	120505626	74	-0.256011	hypo
chr1	120506201	120506572	372	-0.257453	hypo
chr1	144921115	144922861	1747	-0.291245	hypo
chr1	144923244	144923445	202	-0.217876	hypo
chr1	145390792	145391376	585	-0.355266	hypo
chr1	145413157	145413337	181	-0.209878	hypo
chr1	145454654	145455591	938	0.253333	hyper
chr1	145456002	145456170	169	0.214074	hyper
chr1	145462102	145462406	305	-0.218373	hypo
chr1	145719780	145721321	1542	-0.261902	hypo
chr1	145721718	145722979	1262	-0.251495	hypo
chr1	145723407	145723688	282	-0.236182	hypo
chr1	145726881	145728104	1224	-0.289566	hypo
chr1	145729065	145729124	60	-0.255546	hypo
chr1	145742076	145743363	1288	-0.257743	hypo
chr1	145743676	145743935	260	-0.312483	hypo
chr1	146581030	146581857	828	-0.212255	hypo
chr1	146583058	146583551	494	-0.22821	hypo
chr1	146640994	146641136	143	-0.415359	hypo
chr1	146641694	146642035	342	-0.402614	hypo
chr1	146642440	146642609	170	-0.20849	hypo
chr1	146683606	146684067	462	-0.243002	hypo
chr1	146694876	146696124	1249	-0.27122	hypo
chr1	146707491	146707729	239	-0.248761	hypo
chr1	146709037	146709525	489	-0.239755	hypo
chr1	146950482	146951759	1278	-0.218357	hypo
chr1	147016000	147016345	346	0.220764	hyper
chr1	147016688	147017223	536	0.272085	hyper
chr1	149142787	149143118	332	-0.222501	hypo
chr1	149937097	149937800	704	-0.22614	hypo
chr1	149945144	149946151	1008	-0.202463	hypo
chr1	149992916	149993623	708	-0.255123	hypo
chr1	150123052	150124200	1149	0.226769	hyper
chr1	150157711	150159338	1628	-0.239201	hypo
chr1	150229411	150231195	1785	-0.206323	hypo
chr1	150244765	150245537	773	0.208848	hyper
chr1	150245988	150246411	424	0.214331	hyper
chr1	150252865	150253406	542	-0.294937	hypo
chr1	150447462	150447632	171	-0.251742	hypo
chr1	150503988	150505573	1586	-0.228224	hypo
chr1	150792876	150793119	244	-0.204412	hypo
chr1	150943942	150945530	1589	-0.207016	hypo
chr1	150953301	150953943	643	-0.252545	hypo
chr1	150954554	150956173	1620	-0.238728	hypo
chr1	150984061	150985879	1819	-0.244798	hypo
chr1	150986198	150986518	321	-0.20038	hypo
chr1	151104973	151106099	1127	0.211531	hyper
chr1	151117598	151118685	1088	0.238818	hyper
chr1	151120393	151120575	183	-0.403044	hypo
chr1	151237323	151239008	1686	-0.36145	hypo
chr1	151239333	151239681	349	-0.21257	hypo
chr1	151282005	151282822	818	-0.245966	hypo
chr1	151283584	151283749	166	-0.269409	hypo
chr1	151284129	151285186	1058	-0.201133	hypo
chr1	151318680	151318998	319	0.231864	hyper
chr1	151339943	151342059	2117	-0.210614	hypo
chr1	151487058	151487222	165	-0.230229	hypo
chr1	151487770	151488230	461	-0.256901	hypo
chr1	151489297	151489675	379	-0.225685	hypo
chr1	151611101	151612127	1027	-0.205557	hypo
chr1	151659934	151661444	1511	-0.204917	hypo
chr1	151791689	151793169	1481	-0.268586	hypo
chr1	151804848	151806073	1226	-0.228352	hypo
chr1	151806381	151806893	513	-0.2441	hypo
chr1	151916480	151917114	635	0.222482	hyper
chr1	151961718	151961819	102	0.234124	hyper
chr1	152006732	152007519	788	0.251402	hyper
chr1	152008083	152008497	415	0.230129	hyper
chr1	153505950	153507919	1970	0.248411	hyper
chr1	153516728	153518476	1749	0.304305	hyper
chr1	153537369	153537937	569	0.202896	hyper
chr1	153538270	153540971	2702	0.221501	hyper
chr1	153669572	153671518	1947	0.217318	hyper
chr1	153739896	153740848	953	-0.272134	hypo
chr1	153915373	153915881	509	-0.224202	hypo
chr1	154126884	154128447	1564	0.246008	hyper
chr1	154209563	154209803	241	-0.322545	hypo
chr1	154210287	154211149	863	-0.313161	hypo
chr1	154299179	154300241	1063	0.222638	hyper
chr1	154376819	154377126	308	-0.245745	hypo
chr1	154385771	154386872	1102	-0.349715	hypo
chr1	154387281	154388576	1296	-0.361372	hypo
chr1	154390625	154390880	256	-0.24928	hypo
chr1	154399416	154400147	732	-0.247447	hypo
chr1	154518226	154520255	2030	-0.240348	hypo
chr1	154840330	154842579	2250	0.200164	hyper
chr1	155075666	155076397	732	-0.215985	hypo
chr1	155079248	155080978	1731	-0.25899	hypo
chr1	155096566	155098671	2106	-0.203416	hypo
chr1	155105013	155106095	1083	-0.213728	hypo
chr1	155106445	155106882	438	-0.22407	hypo
chr1	155138162	155139650	1489	0.215017	hyper
chr1	155254745	155257127	2383	-0.229545	hypo
chr1	155264115	155265909	1795	0.242497	hyper
chr1	155269566	155271423	1858	-0.362222	hypo
chr1	155274282	155276171	1890	-0.2667	hypo
chr1	155456624	155456986	363	-0.231342	hypo
chr1	155896010	155896942	933	-0.21435	hypo
chr1	155910930	155912018	1089	0.213708	hyper
chr1	155931344	155933058	1715	0.238889	hyper
chr1	155939262	155941006	1745	0.298	hyper
chr1	155944315	155945493	1179	0.311582	hyper
chr1	155949012	155949839	828	0.330143	hyper
chr1	155950155	155950966	812	0.211007	hyper
chr1	155982376	155982434	59	0.216078	hyper
chr1	156040319	156040665	347	-0.235597	hypo
chr1	156094357	156097197	2841	0.216497	hyper
chr1	156183687	156184597	911	-0.237698	hypo
chr1	156185478	156185907	430	-0.327179	hypo
chr1	156245752	156246213	462	-0.209878	hypo
chr1	156260354	156260403	50	-0.202603	hypo
chr1	156424922	156426056	1135	-0.244829	hypo
chr1	156449975	156451574	1600	0.206287	hyper
chr1	156472530	156474017	1488	0.269048	hyper
chr1	156820971	156822819	1849	-0.242095	hypo
chr1	157530549	157530612	64	-0.231465	hypo
chr1	157980023	157980428	406	0.210224	hyper
chr1	158177090	158177629	540	-0.25742	hypo
chr1	158241552	158241895	344	-0.236472	hypo
chr1	158517099	158517516	418	-0.201011	hypo
chr1	158601089	158601165	77	-0.225926	hypo
chr1	158714604	158714809	206	-0.222621	hypo
chr1	158909667	158910002	336	-0.209036	hypo
chr1	159435625	159436015	391	-0.22062	hypo
chr1	159436376	159436767	392	-0.215734	hypo
chr1	159526064	159527520	1457	-0.227537	hypo
chr1	159528524	159528577	54	-0.273272	hypo
chr1	159557257	159558952	1696	-0.396917	hypo
chr1	159559923	159560266	344	-0.368898	hypo
chr1	159674808	159676046	1239	-0.225684	hypo
chr1	159879830	159880548	719	0.277467	hyper
chr1	159881334	159881871	538	0.20212	hyper
chr1	159890810	159891059	250	0.244375	hyper
chr1	159891474	159892243	770	0.230943	hyper
chr1	159913820	159914923	1104	-0.24196	hypo
chr1	160206833	160206934	102	-0.243778	hypo
chr1	160207490	160207798	309	-0.326092	hypo
chr1	160208406	160208608	203	-0.351308	hypo
chr1	160233135	160233444	310	-0.220766	hypo
chr1	160234854	160234962	109	-0.269861	hypo
chr1	160255369	160255889	521	-0.213949	hypo
chr1	160262906	160265284	2379	-0.202004	hypo
chr1	161162470	161164044	1575	-0.326338	hypo
chr1	161188512	161191483	2972	-0.349956	hypo
chr1	161192227	161192828	602	-0.391315	hypo
chr1	161193179	161193393	215	-0.468664	hypo
chr1	161193933	161194820	888	-0.423853	hypo
chr1	161206178	161206502	325	-0.266594	hypo
chr1	161207494	161209099	1606	-0.307426	hypo
chr1	161289267	161289932	666	-0.378218	hypo
chr1	161290561	161290910	350	-0.203251	hypo
chr1	161646918	161647672	755	-0.319232	hypo
chr1	161648450	161648655	206	-0.23835	hypo
chr1	162099221	162099950	730	-0.223004	hypo
chr1	162100918	162101086	169	-0.300723	hypo
chr1	162101990	162102355	366	-0.271829	hypo
chr1	162102779	162102955	177	-0.225148	hypo
chr1	162114131	162115628	1498	-0.203689	hypo
chr1	162165010	162167951	2942	-0.237947	hypo
chr1	162335967	162336003	37	-0.228515	hypo
chr1	162340470	162340845	376	-0.207331	hypo
chr1	162341218	162342846	1629	-0.233235	hypo
chr1	162650779	162651226	448	-0.207685	hypo
chr1	162974320	162974545	226	-0.210884	hypo
chr1	163896553	163896775	223	-0.209999	hypo
chr1	164532018	164532313	296	0.384606	hyper
chr1	164533042	164533463	422	0.329952	hyper
chr1	164968338	164968874	537	-0.202308	hypo
chr1	164969348	164969478	131	-0.227699	hypo
chr1	164969831	164969939	109	-0.234875	hypo
chr1	165202858	165203820	963	-0.300435	hypo
chr1	165601588	165602062	475	0.241972	hyper
chr1	165602422	165602501	80	0.27501	hyper
chr1	165686196	165687634	1439	-0.207354	hypo
chr1	165716835	165717121	287	-0.230472	hypo
chr1	165825897	165827083	1187	-0.236193	hypo
chr1	165827444	165828848	1405	-0.24826	hypo
chr1	166839682	166840009	328	-0.224579	hypo
chr1	166841523	166841636	114	-0.204883	hypo
chr1	166842178	166842243	66	-0.231977	hypo
chr1	166842729	166844048	1320	-0.27053	hypo
chr1	167192321	167193222	902	-0.20318	hypo
chr1	167373630	167373783	154	0.239395	hyper
chr1	167511809	167513035	1227	-0.230238	hypo
chr1	167617701	167618120	420	0.300727	hyper
chr1	167618467	167619826	1360	0.239029	hyper
chr1	167766160	167766195	36	0.20612	hyper
chr1	167881808	167884082	2275	-0.400583	hypo
chr1	167884595	167884989	395	-0.486483	hypo
chr1	167885713	167885734	22	-0.418256	hypo
chr1	167895786	167896394	609	-0.434577	hypo
chr1	167897304	167897314	11	-0.528614	hypo
chr1	167900459	167900524	66	-0.311636	hypo
chr1	167902199	167902728	530	-0.319843	hypo
chr1	168107365	168107679	315	0.299318	hyper
chr1	168196376	168197404	1029	0.252124	hyper
chr1	168200279	168200387	109	-0.23795	hypo
chr1	168235619	168236196	578	-0.20364	hypo
chr1	168464780	168465079	300	-0.210753	hypo
chr1	168662508	168662559	52	-0.201179	hypo
chr1	168769849	168769954	106	-0.230065	hypo
chr1	169113832	169115023	1192	-0.324153	hypo
chr1	169203904	169204222	319	-0.333784	hypo
chr1	169452505	169453025	521	-0.236029	hypo
chr1	169453427	169453817	391	-0.235814	hypo
chr1	169861560	169861885	326	-0.221918	hypo
chr1	171059935	171061033	1099	-0.410653	hypo
chr1	171061472	171061712	241	-0.406587	hypo
chr1	171062497	171062779	283	-0.380024	hypo
chr1	171063221	171063354	134	-0.357973	hypo
chr1	171189647	171190150	504	0.222567	hyper
chr1	171297471	171297517	47	-0.236435	hypo
chr1	171297914	171299100	1187	-0.266898	hypo
chr1	171299669	171299847	179	-0.202822	hypo
chr1	171313084	171314408	1325	-0.270439	hypo
chr1	171712333	171712967	635	0.200574	hyper
chr1	171873173	171873344	172	0.218222	hyper
chr1	172503696	172504863	1168	0.213365	hyper
chr1	173702380	173703375	996	-0.279808	hypo
chr1	173711151	173711438	288	-0.218654	hypo
chr1	173881398	173881494	97	-0.261541	hypo
chr1	173882575	173883252	678	-0.280459	hypo
chr1	173883567	173884551	985	-0.395189	hypo
chr1	173885047	173886485	1439	-0.508299	hypo
chr1	173886993	173887467	475	-0.326767	hypo
chr1	173893705	173894220	516	-0.360835	hypo
chr1	173895250	173895886	637	-0.397566	hypo
chr1	173899448	173899585	138	-0.213206	hypo
chr1	173992208	173993176	969	0.204538	hyper
chr1	174736195	174736310	116	-0.260247	hypo
chr1	174736722	174737697	976	-0.263767	hypo
chr1	174741055	174741620	566	-0.296883	hypo
chr1	175703553	175704705	1153	-0.210605	hypo
chr1	176133644	176133887	244	-0.201787	hypo
chr1	176521193	176522505	1313	0.243045	hyper
chr1	176736343	176737850	1508	-0.243522	hypo
chr1	177936343	177938464	2122	-0.318727	hypo
chr1	177938852	177939673	822	-0.401866	hypo
chr1	178230782	178230833	52	0.296311	hyper
chr1	178505524	178507411	1888	-0.289967	hypo
chr1	178512793	178513390	598	-0.227882	hypo
chr1	178521018	178521663	646	-0.200913	hypo
chr1	178543391	178543603	213	-0.250387	hypo
chr1	178696289	178696493	205	-0.337691	hypo
chr1	178714301	178714440	140	-0.242081	hypo
chr1	178887394	178887563	170	-0.235378	hypo
chr1	179049825	179050298	474	-0.259932	hypo
chr1	179058237	179060719	2483	-0.338636	hypo
chr1	179061092	179061312	221	-0.229015	hypo
chr1	179398009	179398051	43	-0.265123	hypo
chr1	180603113	180603494	382	0.222073	hyper
chr1	180746390	180746630	241	-0.206607	hypo
chr1	180747265	180748085	821	-0.226386	hypo
chr1	180904317	180905318	1002	-0.217916	hypo
chr1	181113332	181113894	563	-0.201733	hypo
chr1	181121750	181122965	1216	0.21948	hyper
chr1	181572039	181573554	1516	-0.203738	hypo
chr1	182258612	182258913	302	-0.217454	hypo
chr1	182259276	182259620	345	-0.262427	hypo
chr1	182261144	182261735	592	-0.329299	hypo
chr1	182262393	182263129	737	-0.261374	hypo
chr1	182337674	182338630	957	0.211011	hyper
chr1	182610767	182612146	1380	-0.217396	hypo
chr1	183028814	183029161	348	0.218613	hyper
chr1	183029679	183030003	325	0.213968	hyper
chr1	183072310	183073051	742	0.200111	hyper
chr1	183550395	183552095	1701	0.28478	hyper
chr1	183775371	183775634	264	0.20636	hyper
chr1	183841651	183841785	135	0.21258	hyper
chr1	183842643	183843409	767	0.22427	hyper
chr1	184595278	184596281	1004	-0.237352	hypo
chr1	184596584	184596854	271	-0.284463	hypo
chr1	184597184	184597376	193	-0.219	hypo
chr1	185446740	185446993	254	-0.23561	hypo
chr1	185704329	185704874	546	0.217649	hyper
chr1	186265765	186266097	333	-0.251814	hypo
chr1	186266933	186267093	161	-0.250407	hypo
chr1	186796060	186796625	566	-0.249251	hypo
chr1	186816962	186817616	655	-0.236441	hypo
chr1	186818378	186818705	328	-0.240815	hypo
chr1	186840608	186840788	181	-0.246444	hypo
chr1	186841420	186841693	274	-0.249093	hypo
chr1	187075105	187075153	49	-0.211458	hypo
chr1	187346592	187346789	198	-0.237216	hypo
chr1	187347305	187347509	205	-0.232949	hypo
chr1	188674902	188675047	146	-0.240539	hypo
chr1	188777333	188777890	558	-0.287586	hypo
chr1	188971808	188972010	203	-0.257785	hypo
chr1	189060164	189060203	40	-0.261534	hypo
chr1	189318849	189318960	112	-0.246421	hypo
chr1	190425421	190425505	85	-0.260837	hypo
chr1	190445959	190446304	346	-0.227011	hypo
chr1	191865713	191866142	430	-0.226735	hypo
chr1	191962833	191963294	462	-0.238217	hypo
chr1	192776020	192776944	925	0.264293	hyper
chr1	193004522	193005380	859	-0.264711	hypo
chr1	193007308	193008018	711	-0.330795	hypo
chr1	193191313	193192056	744	0.229674	hyper
chr1	193441357	193442090	734	-0.231615	hypo
chr1	193442739	193443900	1162	-0.258496	hypo
chr1	193574640	193575376	737	-0.211233	hypo
chr1	194554387	194554510	124	-0.226284	hypo
chr1	194674920	194675288	369	-0.201203	hypo
chr1	196023678	196023945	268	-0.218843	hypo
chr1	196624736	196625157	422	-0.300743	hypo
chr1	196625878	196626137	260	-0.342635	hypo
chr1	196627327	196627901	575	-0.378133	hypo
chr1	196701804	196702931	1128	-0.285079	hypo
chr1	196856294	196856586	293	-0.289154	hypo
chr1	196859929	196860551	623	-0.331832	hypo
chr1	196944705	196945015	311	-0.238435	hypo
chr1	196945530	196946777	1248	-0.285882	hypo
chr1	197896753	197897238	486	-0.227792	hypo
chr1	198899116	198899677	562	0.267774	hyper
chr1	198901567	198901839	273	0.351244	hyper
chr1	199416438	199416521	84	-0.207118	hypo
chr1	199615992	199616322	331	-0.245778	hypo
chr1	199833910	199835667	1758	-0.337243	hypo
chr1	199995432	199996319	888	-0.239358	hypo
chr1	200000097	200000264	168	-0.305654	hypo
chr1	200020614	200020692	79	-0.223368	hypo
chr1	200088614	200089032	419	-0.216433	hypo
chr1	200190658	200191084	427	-0.222567	hypo
chr1	200192144	200192802	659	-0.234987	hypo
chr1	200216459	200217178	720	0.200199	hyper
chr1	200243339	200243597	259	-0.219334	hypo
chr1	200243986	200246160	2175	-0.260669	hypo
chr1	200265710	200266079	370	-0.217268	hypo
chr1	200266387	200267386	1000	-0.241706	hypo
chr1	200267804	200268166	363	-0.212769	hypo
chr1	200376311	200376359	49	-0.220079	hypo
chr1	200380762	200381815	1054	-0.279733	hypo
chr1	200445594	200446269	676	-0.211412	hypo
chr1	200446719	200447564	846	-0.314108	hypo
chr1	200447867	200448497	631	-0.232676	hypo
chr1	200710587	200710965	379	0.339004	hyper
chr1	201365985	201366493	509	-0.257644	hypo
chr1	201367070	201367905	836	-0.232225	hypo
chr1	201418264	201419227	964	0.226541	hyper
chr1	201425340	201426665	1326	0.200812	hyper
chr1	201430400	201431601	1202	0.216186	hyper
chr1	201683285	201684174	890	0.255661	hyper
chr1	201684539	201684967	429	0.216346	hyper
chr1	201709835	201710402	568	0.204262	hyper
chr1	201816048	201816088	41	-0.210969	hypo
chr1	201817536	201817767	232	-0.240333	hypo
chr1	201979421	201980774	1354	-0.233861	hypo
chr1	201986506	201986683	178	-0.214329	hypo
chr1	202087175	202087811	637	-0.246989	hypo
chr1	202136755	202137842	1088	0.228968	hyper
chr1	202168301	202169863	1563	0.223618	hyper
chr1	202301587	202302657	1071	-0.237412	hypo
chr1	202775193	202775849	657	0.200839	hyper
chr1	203275927	203276944	1018	0.512453	hyper
chr1	203277577	203278058	482	0.279815	hyper
chr1	203290139	203290738	600	0.207177	hyper
chr1	203291071	203291214	144	0.231372	hyper
chr1	203292882	203295092	2211	0.250792	hyper
chr1	203597264	203598588	1325	0.221405	hyper
chr1	203641252	203644370	3119	0.200469	hyper
chr1	203780345	203780793	449	-0.219065	hypo
chr1	203866150	203866752	603	-0.242461	hypo
chr1	203868096	203868323	228	-0.274605	hypo
chr1	204098611	204100707	2097	-0.261446	hypo
chr1	204112117	204113198	1082	-0.346152	hypo
chr1	204113761	204113903	143	-0.381252	hypo
chr1	204114225	204114549	325	-0.374307	hypo
chr1	204114906	204115885	980	-0.377962	hypo
chr1	204116251	204116699	449	-0.328351	hypo
chr1	204118666	204120190	1525	-0.300329	hypo
chr1	204194726	204195532	807	-0.274032	hypo
chr1	204224707	204226379	1673	-0.253204	hypo
chr1	204257904	204258208	305	-0.204335	hypo
chr1	204258522	204258682	161	-0.223332	hypo
chr1	204327637	204329510	1874	0.234786	hyper
chr1	204472613	204472932	320	-0.270053	hypo
chr1	204473338	204474305	968	-0.239563	hypo
chr1	204963494	204965084	1591	-0.20832	hypo
chr1	205011547	205014248	2702	0.206669	hyper
chr1	205633665	205634188	524	-0.257892	hypo
chr1	205639550	205640101	552	-0.363638	hypo
chr1	205645388	205645982	595	-0.287664	hypo
chr1	205646372	205648589	2218	-0.336258	hypo
chr1	205695051	205695056	6	-0.235004	hypo
chr1	205696855	205697116	262	-0.358221	hypo
chr1	205698875	205699456	582	-0.258656	hypo
chr1	206682980	206684084	1105	-0.204834	hypo
chr1	206690604	206692672	2069	-0.351483	hypo
chr1	206832495	206833326	832	-0.245606	hypo
chr1	206840240	206840452	213	-0.212023	hypo
chr1	207122667	207122728	62	-0.217285	hypo
chr1	207123036	207123820	785	-0.224951	hypo
chr1	207124281	207124609	329	-0.200621	hypo
chr1	207142322	207143184	863	-0.233912	hypo
chr1	207143533	207144061	529	-0.286566	hypo
chr1	207144367	207144812	446	-0.258115	hypo
chr1	207193487	207193695	209	0.200817	hyper
chr1	207261221	207261803	583	-0.222894	hypo
chr1	207262190	207262985	796	-0.310416	hypo
chr1	207263326	207263823	498	-0.354325	hypo
chr1	207277018	207277940	923	-0.277843	hypo
chr1	207278324	207278677	354	-0.320832	hypo
chr1	207279480	207280362	883	-0.279996	hypo
chr1	207490379	207490622	244	0.260637	hyper
chr1	207490952	207491437	486	0.238109	hyper
chr1	208045631	208045977	347	0.219782	hyper
chr1	208046319	208047073	755	0.211691	hyper
chr1	208081063	208081926	864	0.210553	hyper
chr1	208082582	208083913	1332	0.286861	hyper
chr1	208392742	208393511	770	0.277241	hyper
chr1	208393816	208395201	1386	0.275553	hyper
chr1	208404208	208407437	3230	0.276667	hyper
chr1	208407807	208408761	955	0.235586	hyper
chr1	208414634	208415353	720	0.246744	hyper
chr1	208415709	208415735	27	0.324941	hyper
chr1	209828839	209830113	1275	-0.262545	hypo
chr1	209830606	209831761	1156	-0.222283	hypo
chr1	209846288	209846856	569	-0.226468	hypo
chr1	209849623	209849971	349	-0.261049	hypo
chr1	209850291	209850616	326	-0.352336	hypo
chr1	209851000	209851281	282	-0.310318	hypo
chr1	209851636	209851885	250	-0.271214	hypo
chr1	209879019	209879231	213	-0.211188	hypo
chr1	209879887	209880457	571	-0.21405	hypo
chr1	209892891	209892996	106	-0.230092	hypo
chr1	209893418	209893913	496	-0.257964	hypo
chr1	209895338	209895659	322	-0.313798	hypo
chr1	209896280	209896820	541	-0.308964	hypo
chr1	209897614	209897837	224	-0.266947	hypo
chr1	209912742	209913043	302	-0.270063	hypo
chr1	209914265	209915278	1014	-0.267948	hypo
chr1	209915588	209915907	320	-0.231648	hypo
chr1	209974171	209974742	572	-0.283837	hypo
chr1	209975357	209975486	130	-0.279733	hypo
chr1	210139436	210139650	215	-0.226454	hypo
chr1	210390836	210391206	371	-0.228527	hypo
chr1	210391628	210391672	45	-0.231353	hypo
chr1	210407973	210408532	560	-0.208931	hypo
chr1	210416252	210416574	323	-0.225993	hypo
chr1	210418321	210418517	197	-0.200522	hypo
chr1	210426756	210427013	258	-0.33461	hypo
chr1	210428147	210428478	332	-0.23043	hypo
chr1	210443491	210444051	561	-0.219676	hypo
chr1	210444461	210444992	532	-0.201959	hypo
chr1	210450232	210450643	412	-0.202026	hypo
chr1	210451733	210451912	180	-0.221334	hypo
chr1	210533933	210534874	942	-0.20579	hypo
chr1	210546585	210547002	418	-0.273855	hypo
chr1	210547557	210548194	638	-0.201967	hypo
chr1	211500768	211501423	656	0.24762	hyper
chr1	211689542	211690222	681	-0.308338	hypo
chr1	211694079	211694743	665	-0.302559	hypo
chr1	211695637	211696736	1100	-0.281629	hypo
chr1	211697051	211698296	1246	-0.212323	hypo
chr1	211748958	211749172	215	-0.446667	hypo
chr1	211806818	211807119	302	-0.20153	hypo
chr1	211810123	211810143	21	-0.205658	hypo
chr1	211810609	211810784	176	-0.204324	hypo
chr1	211816424	211817912	1489	-0.215227	hypo
chr1	211897941	211898607	667	-0.262226	hypo
chr1	211899242	211899364	123	-0.218638	hypo
chr1	212000827	212001353	527	-0.215288	hypo
chr1	212002467	212002936	470	-0.247529	hypo
chr1	212005123	212005706	584	-0.209116	hypo
chr1	212082602	212083087	486	-0.301958	hypo
chr1	212083511	212084643	1133	-0.258708	hypo
chr1	212094320	212096074	1755	-0.233909	hypo
chr1	212117198	212117830	633	-0.288538	hypo
chr1	212118193	212118457	265	-0.263545	hypo
chr1	212281758	212282585	828	0.21711	hyper
chr1	212283302	212283411	110	0.209464	hyper
chr1	212392770	212394360	1591	0.208473	hyper
chr1	212430100	212430368	269	-0.232465	hypo
chr1	212430692	212431032	341	-0.254141	hypo
chr1	212431390	212432225	836	-0.243242	hypo
chr1	212476131	212476650	520	0.211997	hyper
chr1	213545145	213546029	885	-0.247719	hypo
chr1	213554078	213555923	1846	0.256181	hyper
chr1	214110264	214110544	281	-0.203871	hypo
chr1	214111845	214112389	545	-0.20565	hypo
chr1	214131941	214132282	342	-0.225214	hypo
chr1	214166090	214166465	376	-0.260449	hypo
chr1	214200438	214201056	619	-0.239854	hypo
chr1	214201403	214201535	133	-0.254894	hypo
chr1	214201867	214203303	1437	-0.264446	hypo
chr1	214297765	214299281	1517	-0.21593	hypo
chr1	214299590	214300076	487	-0.291968	hypo
chr1	214300850	214300910	61	-0.228551	hypo
chr1	214361493	214362080	588	0.252147	hyper
chr1	214381745	214382829	1085	-0.233878	hypo
chr1	214485175	214488492	3318	-0.242555	hypo
chr1	214510605	214511333	729	0.217881	hyper
chr1	214541839	214542319	481	-0.200278	hypo
chr1	215809182	215810313	1132	-0.248126	hypo
chr1	215813676	215814064	389	-0.424931	hypo
chr1	215817811	215818813	1003	-0.353357	hypo
chr1	217264534	217266076	1543	-0.213041	hypo
chr1	218106802	218107073	272	-0.257132	hypo
chr1	218181577	218181682	106	-0.22788	hypo
chr1	218523305	218523730	426	0.206246	hyper
chr1	218538438	218539405	968	0.205893	hyper
chr1	219247635	219247713	79	-0.259833	hypo
chr1	219837283	219837941	659	-0.229791	hypo
chr1	220051283	220051562	280	-0.264428	hypo
chr1	220097359	220098017	659	-0.406184	hypo
chr1	220098329	220098641	313	-0.474344	hypo
chr1	220099770	220100224	455	-0.427549	hypo
chr1	220100704	220100825	122	-0.377485	hypo
chr1	220102517	220103143	627	-0.398907	hypo
chr1	220127294	220127743	450	-0.310178	hypo
chr1	220128155	220128800	646	-0.284597	hypo
chr1	220165937	220167134	1198	-0.226861	hypo
chr1	220266799	220267054	256	-0.213076	hypo
chr1	220935526	220935946	421	-0.240691	hypo
chr1	220958305	220959461	1157	-0.227702	hypo
chr1	220961043	220962163	1121	-0.221318	hypo
chr1	220969991	220970227	237	-0.305654	hypo
chr1	220982332	220983560	1229	-0.208497	hypo
chr1	221157070	221157878	809	-0.233236	hypo
chr1	221722228	221722501	274	-0.244069	hypo
chr1	221726191	221726757	567	-0.275079	hypo
chr1	221736605	221738415	1811	-0.432809	hypo
chr1	221794561	221794819	259	-0.249547	hypo
chr1	221870704	221872058	1355	-0.347636	hypo
chr1	221874273	221874492	220	-0.332766	hypo
chr1	221875763	221875828	66	-0.208352	hypo
chr1	221890051	221891789	1739	-0.204312	hypo
chr1	221912212	221913841	1630	-0.216292	hypo
chr1	222199418	222200172	755	-0.320825	hypo
chr1	222201674	222202154	481	-0.219852	hypo
chr1	222230948	222231722	775	-0.237466	hypo
chr1	222232137	222232754	618	-0.316956	hypo
chr1	222234018	222234397	380	-0.362417	hypo
chr1	222235128	222235307	180	-0.332644	hypo
chr1	222640045	222640144	100	-0.26315	hypo
chr1	222694695	222695090	396	-0.307653	hypo
chr1	222728407	222728512	106	-0.220071	hypo
chr1	222728821	222729604	784	-0.258703	hypo
chr1	222789918	222790027	110	-0.258287	hypo
chr1	222800501	222800921	421	-0.201967	hypo
chr1	222883293	222883390	98	0.333094	hyper
chr1	223808117	223810627	2511	-0.247949	hypo
chr1	223810956	223811042	87	-0.240469	hypo
chr1	223892667	223894534	1868	0.209807	hyper
chr1	223900997	223901741	745	0.261257	hyper
chr1	223920729	223920968	240	0.214315	hyper
chr1	223921301	223922149	849	0.223389	hyper
chr1	223925998	223926783	786	0.247591	hyper
chr1	223927137	223927970	834	0.259516	hyper
chr1	223959451	223960984	1534	0.258447	hyper
chr1	223995765	223995962	198	-0.207574	hypo
chr1	224074310	224075015	706	-0.218004	hypo
chr1	224304602	224304642	41	-0.329102	hypo
chr1	224305437	224305583	147	-0.309149	hypo
chr1	224323170	224324153	984	-0.249528	hypo
chr1	224385057	224385113	57	-0.258173	hypo
chr1	224398548	224399352	805	-0.21036	hypo
chr1	224692880	224694959	2080	-0.214998	hypo
chr1	224700473	224700823	351	-0.200802	hypo
chr1	225611366	225611969	604	-0.20133	hypo
chr1	225628650	225630335	1686	-0.228455	hypo
chr1	225837810	225838290	481	0.313727	hyper
chr1	226011551	226013684	2134	-0.270412	hypo
chr1	226014112	226015817	1706	-0.313603	hypo
chr1	226032794	226035256	2463	-0.215997	hypo
chr1	226066955	226068075	1121	-0.239222	hypo
chr1	226074352	226074463	112	-0.360695	hypo
chr1	226074780	226075069	290	-0.378698	hypo
chr1	226078135	226078547	413	-0.285111	hypo
chr1	226078897	226079210	314	-0.345358	hypo
chr1	226253478	226253498	21	0.200313	hyper
chr1	226253991	226254401	411	0.219649	hyper
chr1	226584925	226585516	592	-0.317838	hypo
chr1	226586114	226586442	329	-0.231633	hypo
chr1	226734755	226735185	431	-0.215635	hypo
chr1	227131733	227134164	2432	-0.212012	hypo
chr1	227152110	227153138	1029	-0.278996	hypo
chr1	227160576	227160963	388	-0.225229	hypo
chr1	227161291	227161315	25	-0.227645	hypo
chr1	227161617	227163532	1916	-0.253235	hypo
chr1	227166979	227169271	2293	-0.287284	hypo
chr1	227431652	227431744	93	-0.22729	hypo
chr1	227432585	227433425	841	-0.207612	hypo
chr1	227514603	227515637	1035	-0.2052	hypo
chr1	227516288	227517144	857	-0.259212	hypo
chr1	227918420	227919859	1440	-0.203639	hypo
chr1	228611229	228611972	744	-0.24417	hypo
chr1	228644213	228644261	49	-0.224695	hypo
chr1	228840307	228840433	127	-0.231609	hypo
chr1	228841512	228841528	17	-0.315766	hypo
chr1	228843102	228843125	24	-0.288099	hypo
chr1	229002047	229003105	1059	-0.228252	hypo
chr1	229243635	229246105	2471	-0.240974	hypo
chr1	229266853	229266970	118	-0.24501	hypo
chr1	229282373	229283485	1113	0.255531	hyper
chr1	229358517	229358947	431	-0.232891	hypo
chr1	229359281	229359492	212	-0.239033	hypo
chr1	229359907	229360303	397	-0.202099	hypo
chr1	229405387	229406468	1082	-0.250933	hypo
chr1	229409171	229410056	886	-0.243065	hypo
chr1	229445270	229445586	317	-0.201396	hypo
chr1	229446265	229447429	1165	-0.232117	hypo
chr1	230024196	230024628	433	-0.274411	hypo
chr1	230025156	230025763	608	-0.27496	hypo
chr1	230205078	230207393	2316	-0.253087	hypo
chr1	230266789	230267553	765	-0.22202	hypo
chr1	230275225	230275901	677	-0.24102	hypo
chr1	230276238	230277002	765	-0.248495	hypo
chr1	230279011	230280221	1211	-0.206241	hypo
chr1	230294691	230296092	1402	-0.293329	hypo
chr1	230299026	230300567	1542	-0.290154	hypo
chr1	230427508	230428093	586	0.252877	hyper
chr1	230434930	230435815	886	-0.205486	hypo
chr1	230462502	230463976	1475	-0.309201	hypo
chr1	230560164	230560973	810	0.258386	hyper
chr1	230843505	230845094	1590	-0.296568	hypo
chr1	230845437	230849399	3963	-0.391739	hypo
chr1	230861035	230861398	364	-0.261627	hypo
chr1	230864281	230864421	141	-0.262346	hypo
chr1	230864724	230865274	551	-0.238959	hypo
chr1	230907605	230908388	784	-0.246053	hypo
chr1	231036552	231036876	325	0.218869	hyper
chr1	231112634	231113370	737	0.223191	hyper
chr1	231120866	231121063	198	0.202875	hyper
chr1	231368363	231368950	588	-0.216147	hypo
chr1	231369321	231370359	1039	-0.289441	hypo
chr1	231529052	231529203	152	-0.281697	hypo
chr1	231529896	231530603	708	-0.258734	hypo
chr1	231558910	231559077	168	-0.221647	hypo
chr1	232121887	232123152	1266	-0.211125	hypo
chr1	232593289	232593570	282	0.200548	hyper
chr1	232704670	232705726	1057	0.205474	hyper
chr1	232706053	232706143	91	0.213952	hyper
chr1	232711080	232711259	180	0.204114	hyper
chr1	232800256	232800508	253	-0.210601	hypo
chr1	233099099	233099418	320	0.258778	hyper
chr1	233166517	233166716	200	-0.211222	hypo
chr1	233615919	233616201	283	-0.220063	hypo
chr1	233722781	233724560	1780	0.205173	hyper
chr1	233806958	233807527	570	-0.210543	hypo
chr1	233808538	233809978	1441	-0.22285	hypo
chr1	234636644	234637565	922	-0.28476	hypo
chr1	234637876	234638444	569	-0.37018	hypo
chr1	234672524	234673443	920	-0.212973	hypo
chr1	234673858	234675194	1337	-0.294743	hypo
chr1	234700323	234700744	422	-0.210472	hypo
chr1	234719667	234720492	826	-0.232469	hypo
chr1	234847752	234848906	1155	-0.217186	hypo
chr1	234851021	234853595	2575	-0.210072	hypo
chr1	235010384	235012890	2507	-0.203804	hypo
chr1	235091106	235091608	503	-0.207187	hypo
chr1	235092313	235094272	1960	-0.351689	hypo
chr1	235100100	235100424	325	-0.260878	hypo
chr1	235109031	235110217	1187	-0.265851	hypo
chr1	235110591	235112673	2083	-0.244367	hypo
chr1	235573321	235573618	298	-0.201054	hypo
chr1	235805151	235806428	1278	0.244531	hyper
chr1	236056324	236056858	535	-0.299134	hypo
chr1	236057939	236058005	67	-0.248901	hypo
chr1	236108950	236110904	1955	-0.215815	hypo
chr1	236162017	236163904	1888	0.201631	hyper
chr1	236174459	236175622	1164	-0.316717	hypo
chr1	236221673	236222651	979	-0.219343	hypo
chr1	236226105	236226368	264	-0.201397	hypo
chr1	236226959	236227080	122	-0.204021	hypo
chr1	236237539	236237857	319	-0.251466	hypo
chr1	236238237	236238319	83	-0.292261	hypo
chr1	236238798	236238871	74	-0.297473	hypo
chr1	236239247	236239486	240	-0.265984	hypo
chr1	236327678	236328007	330	-0.215538	hypo
chr1	236494873	236496793	1921	-0.295776	hypo
chr1	236497170	236497349	180	-0.264264	hypo
chr1	236678646	236679518	873	-0.254503	hypo
chr1	236694914	236695907	994	-0.33197	hypo
chr1	236696297	236696456	160	-0.359549	hypo
chr1	236697119	236697359	241	-0.222752	hypo
chr1	236699090	236699582	493	-0.213255	hypo
chr1	236998145	236999107	963	-0.220207	hypo
chr1	237008047	237008377	331	-0.244483	hypo
chr1	237024640	237025095	456	-0.219078	hypo
chr1	237025551	237025932	382	-0.20968	hypo
chr1	237165675	237166243	569	-0.207416	hypo
chr1	237356253	237356404	152	-0.202118	hypo
chr1	237357555	237357976	422	-0.214017	hypo
chr1	237423550	237423861	312	-0.200035	hypo
chr1	237537973	237538172	200	-0.215159	hypo
chr1	237618208	237618523	316	-0.219322	hypo
chr1	237618987	237619104	118	-0.217426	hypo
chr1	237667864	237668335	472	-0.202729	hypo
chr1	237692505	237692613	109	-0.207428	hypo
chr1	238809184	238809726	543	-0.219643	hypo
chr1	238963537	238964074	538	-0.229323	hypo
chr1	239435546	239436731	1186	-0.238397	hypo
chr1	239437721	239438115	395	-0.217284	hypo
chr1	239479707	239479891	185	-0.211496	hypo
chr1	239558207	239558791	585	-0.210097	hypo
chr1	239705288	239706311	1024	-0.20531	hypo
chr1	239720844	239720943	100	-0.217029	hypo
chr1	239984913	239985673	761	-0.211618	hypo
chr1	240196898	240196944	47	-0.206942	hypo
chr1	240258828	240259301	474	-0.259058	hypo
chr1	240259800	240260060	261	-0.20702	hypo
chr1	240295353	240296133	781	-0.224617	hypo
chr1	240296569	240296903	335	-0.249268	hypo
chr1	240334663	240334951	289	-0.221558	hypo
chr1	240758947	240760370	1424	-0.204483	hypo
chr1	240762195	240762352	158	-0.280399	hypo
chr1	240762829	240763350	522	-0.267753	hypo
chr1	240771712	240772164	453	-0.23756	hypo
chr1	240772875	240773369	495	-0.274006	hypo
chr1	240773671	240773995	325	-0.200478	hypo
chr1	240776162	240776316	155	-0.21887	hypo
chr1	240776779	240777048	270	-0.263544	hypo
chr1	240902875	240903129	255	-0.202877	hypo
chr1	240978023	240978885	863	-0.204603	hypo
chr1	240999100	241000056	957	-0.227755	hypo
chr1	241000546	241000591	46	-0.236949	hypo
chr1	241036205	241036373	169	-0.203984	hypo
chr1	241091399	241092206	808	-0.201415	hypo
chr1	241160570	241160792	223	-0.216614	hypo
chr1	241161847	241162384	538	-0.241558	hypo
chr1	241273318	241273870	553	-0.271609	hypo
chr1	241274656	241275355	700	-0.243998	hypo
chr1	241437801	241438242	442	-0.234353	hypo
chr1	241479385	241479953	569	-0.235039	hypo
chr1	241678082	241678325	244	-0.21958	hypo
chr1	241696310	241697194	885	-0.291754	hypo
chr1	241721628	241722378	751	-0.298564	hypo
chr1	241778642	241779901	1260	-0.229272	hypo
chr1	241791354	241791905	552	-0.275727	hypo
chr1	241795143	241795373	231	-0.256722	hypo
chr1	242623709	242623738	30	-0.253629	hypo
chr1	242840158	242840455	298	-0.201985	hypo
chr1	242935664	242935924	261	-0.238114	hypo
chr1	242986127	242986632	506	-0.214515	hypo
chr1	242987245	242988080	836	-0.201017	hypo
chr1	243428717	243429109	393	0.214026	hyper
chr1	243509193	243509603	411	-0.215384	hypo
chr1	243556543	243556712	170	-0.265631	hypo
chr1	243557350	243557694	345	-0.368441	hypo
chr1	243558069	243558493	425	-0.437967	hypo
chr1	243560206	243560480	275	-0.294685	hypo
chr1	243617679	243618095	417	-0.415469	hypo
chr1	243618790	243619704	915	-0.431083	hypo
chr1	243624701	243625663	963	-0.244724	hypo
chr1	243646965	243647981	1017	-0.262168	hypo
chr1	243658745	243659256	512	-0.21149	hypo
chr1	243902978	243903465	488	-0.208325	hypo
chr1	244226915	244228968	2054	-0.244346	hypo
chr1	244252879	244253368	490	-0.294958	hypo
chr1	244253921	244254417	497	-0.37144	hypo
chr1	244254763	244255249	487	-0.3406	hypo
chr1	244255607	244255876	270	-0.256246	hypo
chr1	244256280	244258405	2126	-0.283115	hypo
chr1	244258714	244259545	832	-0.270226	hypo
chr1	244269668	244270616	949	-0.207698	hypo
chr1	244497333	244497378	46	-0.216715	hypo
chr1	244823719	244823803	85	0.274851	hyper
chr1	245127254	245127824	571	0.212006	hyper
chr1	245208360	245208618	259	-0.275953	hypo
chr1	245208976	245209145	170	-0.240377	hypo
chr1	245970395	245972356	1962	0.21392	hyper
chr1	246714838	246715772	935	-0.201938	hypo
chr1	246722540	246723329	790	-0.211042	hypo
chr1	246745719	246746625	907	-0.216754	hypo
chr1	246870850	246871229	380	-0.238688	hypo
chr1	246871768	246872902	1135	-0.287166	hypo
chr1	246873298	246873862	565	-0.228029	hypo
chr1	246888500	246889650	1151	-0.330135	hypo
chr1	246890297	246890814	518	-0.383686	hypo
chr1	246891145	246891390	246	-0.287609	hypo
chr1	246938943	246939927	985	-0.202013	hypo
chr1	246950901	246952118	1218	-0.254013	hypo
chr1	247386060	247386417	358	-0.207928	hypo
chr1	247698186	247699657	1472	-0.206612	hypo
chr1	247804705	247805504	800	-0.248131	hypo
chr1	248029727	248030061	335	-0.219883	hypo
chr1	248030580	248030979	400	-0.212713	hypo
chr1	248040221	248040612	392	-0.208234	hypo
chr1	248097816	248097966	151	-0.204217	hypo
chr1	248134056	248134605	550	-0.236326	hypo
chr10	352295	356558	4264	-0.208844	hypo
chr10	384433	385040	608	-0.232429	hypo
chr10	850196	851128	933	0.212727	hyper
chr10	917224	919138	1915	-0.247721	hypo
chr10	1020204	1020879	676	0.215236	hyper
chr10	1511146	1511817	672	-0.226934	hypo
chr10	1512183	1512856	674	-0.23388	hypo
chr10	1842779	1843154	376	-0.20238	hypo
chr10	1919696	1919976	281	-0.210485	hypo
chr10	1920392	1920836	445	-0.214925	hypo
chr10	1921307	1921709	403	-0.2395	hypo
chr10	1922299	1922948	650	-0.226887	hypo
chr10	2237808	2237919	112	-0.226896	hypo
chr10	2238609	2239173	565	-0.242855	hypo
chr10	2303662	2303930	269	-0.219362	hypo
chr10	2304904	2305067	164	-0.209063	hypo
chr10	2366351	2367171	821	-0.208193	hypo
chr10	2411711	2411830	120	-0.21584	hypo
chr10	2425977	2427214	1238	-0.215583	hypo
chr10	2427572	2428034	463	-0.220328	hypo
chr10	2439793	2442104	2312	-0.215167	hypo
chr10	2468563	2469973	1411	-0.2088	hypo
chr10	2490574	2490890	317	-0.23626	hypo
chr10	2519129	2519209	81	-0.206354	hypo
chr10	2519544	2519964	421	-0.219761	hypo
chr10	2549698	2550049	352	-0.230119	hypo
chr10	2551039	2551531	493	-0.222658	hypo
chr10	2576627	2577584	958	-0.225757	hypo
chr10	2616209	2616512	304	-0.202423	hypo
chr10	2633065	2633569	505	-0.220196	hypo
chr10	2714637	2715408	772	-0.209815	hypo
chr10	2715730	2716159	430	-0.208016	hypo
chr10	2719346	2719639	294	-0.205716	hypo
chr10	2720170	2720626	457	-0.229494	hypo
chr10	2737477	2737994	518	-0.270583	hypo
chr10	2864240	2865382	1143	-0.203877	hypo
chr10	2900578	2900905	328	-0.205461	hypo
chr10	2910087	2910559	473	-0.218028	hypo
chr10	2910940	2911481	542	-0.218224	hypo
chr10	3144429	3145343	915	-0.273752	hypo
chr10	3153465	3154615	1151	-0.22043	hypo
chr10	3407117	3408351	1235	-0.206645	hypo
chr10	3509399	3510038	640	0.220244	hyper
chr10	3677487	3677683	197	-0.215418	hypo
chr10	3723452	3724741	1290	-0.3024	hypo
chr10	3768765	3770135	1371	-0.284892	hypo
chr10	3770950	3771180	231	-0.239596	hypo
chr10	3847860	3848384	525	0.239702	hyper
chr10	3851491	3852435	945	-0.225558	hypo
chr10	4076501	4077635	1135	0.2432	hyper
chr10	4077969	4078236	268	0.278734	hyper
chr10	4192857	4193354	498	-0.279733	hypo
chr10	4193664	4193916	253	-0.220034	hypo
chr10	4501608	4502070	463	-0.220857	hypo
chr10	4931791	4932169	379	-0.22649	hypo
chr10	4933102	4933404	303	-0.22907	hypo
chr10	4956510	4956637	128	-0.249876	hypo
chr10	5007008	5007747	740	-0.350412	hypo
chr10	5185464	5185530	67	-0.237518	hypo
chr10	5189070	5190317	1248	-0.281476	hypo
chr10	5237570	5237881	312	-0.343821	hypo
chr10	5238849	5238972	124	-0.422244	hypo
chr10	5239304	5239729	426	-0.432564	hypo
chr10	5241199	5242148	950	-0.380793	hypo
chr10	5258737	5259056	320	-0.203946	hypo
chr10	5333615	5334467	853	0.215135	hyper
chr10	5453862	5453978	117	0.209712	hyper
chr10	5569521	5571986	2466	-0.341644	hypo
chr10	5615695	5617324	1630	-0.204167	hypo
chr10	5628378	5628610	233	0.205162	hyper
chr10	5686767	5688777	2011	-0.274226	hypo
chr10	5689503	5689831	329	-0.271808	hypo
chr10	5690878	5690914	37	-0.232464	hypo
chr10	5692908	5693723	816	-0.286227	hypo
chr10	5694180	5694862	683	-0.245253	hypo
chr10	5701832	5702678	847	-0.237756	hypo
chr10	5706020	5707419	1400	-0.217283	hypo
chr10	5794025	5795001	977	-0.213217	hypo
chr10	5924175	5925379	1205	-0.210974	hypo
chr10	5927813	5927964	152	-0.217715	hypo
chr10	5944122	5945115	994	-0.233092	hypo
chr10	5945581	5945591	11	-0.222834	hypo
chr10	5972307	5972855	549	-0.246218	hypo
chr10	5973211	5973433	223	-0.225678	hypo
chr10	5977096	5978238	1143	-0.267514	hypo
chr10	6006878	6007645	768	-0.205953	hypo
chr10	6011606	6011833	228	-0.214041	hypo
chr10	6143244	6143719	476	-0.269737	hypo
chr10	6166218	6166425	208	0.273361	hyper
chr10	6166787	6167011	225	0.264342	hyper
chr10	6184909	6185577	669	-0.207196	hypo
chr10	6215743	6217492	1750	-0.251386	hypo
chr10	6344313	6345022	710	-0.288993	hypo
chr10	6452715	6453601	887	-0.228276	hypo
chr10	6508747	6509654	908	-0.221157	hypo
chr10	6671267	6671552	286	-0.209439	hypo
chr10	7274291	7274489	199	-0.22284	hypo
chr10	7274796	7275310	515	-0.24883	hypo
chr10	7275973	7277055	1083	-0.225776	hypo
chr10	7457518	7458002	485	-0.244655	hypo
chr10	7738727	7738936	210	-0.219177	hypo
chr10	7743004	7743459	456	-0.327464	hypo
chr10	7751088	7751855	768	-0.332067	hypo
chr10	8222513	8222973	461	-0.268023	hypo
chr10	8223453	8223947	495	-0.287256	hypo
chr10	8344316	8345307	992	-0.205292	hypo
chr10	8472513	8472564	52	-0.237944	hypo
chr10	8473861	8474230	370	-0.274985	hypo
chr10	8565600	8565801	202	-0.230911	hypo
chr10	8612557	8613273	717	-0.250374	hypo
chr10	8749220	8749475	256	-0.23107	hypo
chr10	8749812	8749937	126	-0.227531	hypo
chr10	8777639	8777836	198	-0.213721	hypo
chr10	8874015	8874558	544	-0.230938	hypo
chr10	9029083	9029217	135	-0.250317	hypo
chr10	9080282	9080603	322	-0.231842	hypo
chr10	9253147	9253818	672	-0.211239	hypo
chr10	9437091	9437526	436	-0.261976	hypo
chr10	9437932	9438088	157	-0.272386	hypo
chr10	9575672	9575918	247	-0.217103	hypo
chr10	9602098	9602566	469	-0.235835	hypo
chr10	9761756	9762620	865	-0.241371	hypo
chr10	9849633	9850041	409	-0.256348	hypo
chr10	9949341	9949907	567	-0.23982	hypo
chr10	9951032	9951780	749	-0.240182	hypo
chr10	10063917	10064879	963	-0.201991	hypo
chr10	10183941	10184177	237	-0.231871	hypo
chr10	10394737	10395985	1249	-0.260076	hypo
chr10	10403235	10403965	731	-0.228374	hypo
chr10	10404634	10404937	304	-0.222972	hypo
chr10	10468737	10468872	136	-0.208271	hypo
chr10	10679122	10679960	839	-0.210723	hypo
chr10	10799186	10799314	129	-0.207666	hypo
chr10	10800151	10800524	374	-0.207072	hypo
chr10	10801036	10802856	1821	-0.209977	hypo
chr10	10803606	10803972	367	-0.214342	hypo
chr10	10947890	10948334	445	-0.222448	hypo
chr10	10948705	10949077	373	-0.213265	hypo
chr10	11017152	11017388	237	-0.206543	hypo
chr10	11274522	11274852	331	-0.200164	hypo
chr10	11301923	11302568	646	-0.219215	hypo
chr10	11308905	11309409	505	-0.24514	hypo
chr10	11564919	11564975	57	-0.213314	hypo
chr10	11726162	11727465	1304	0.295924	hyper
chr10	11728029	11728700	672	0.209021	hyper
chr10	11739268	11741190	1923	-0.273065	hypo
chr10	11741509	11742821	1313	-0.293432	hypo
chr10	11756677	11758666	1990	-0.250431	hypo
chr10	11784997	11785871	875	-0.238848	hypo
chr10	11835932	11836992	1061	-0.219348	hypo
chr10	11866847	11868599	1753	-0.26707	hypo
chr10	11869030	11869873	844	-0.312271	hypo
chr10	11870237	11870785	549	-0.255024	hypo
chr10	11873793	11873861	69	-0.227306	hypo
chr10	11874178	11874645	468	-0.256133	hypo
chr10	11875138	11875430	293	-0.237915	hypo
chr10	11888237	11889002	766	-0.242209	hypo
chr10	11915886	11918265	2380	-0.214047	hypo
chr10	12028172	12028254	83	-0.263366	hypo
chr10	12028783	12029484	702	-0.207495	hypo
chr10	12112226	12114353	2128	-0.410091	hypo
chr10	12115571	12116718	1148	-0.252802	hypo
chr10	12119482	12120524	1043	-0.211096	hypo
chr10	12130613	12131229	617	-0.323987	hypo
chr10	12197937	12198052	116	-0.201813	hypo
chr10	12198495	12198995	501	-0.39373	hypo
chr10	12205948	12206627	680	-0.337719	hypo
chr10	12206994	12207192	199	-0.339977	hypo
chr10	12207767	12207909	143	-0.214517	hypo
chr10	12233634	12234251	618	-0.220245	hypo
chr10	12234574	12235569	996	-0.299291	hypo
chr10	12283850	12284571	722	0.204439	hyper
chr10	12398874	12401521	2648	-0.305316	hypo
chr10	12407249	12408253	1005	-0.210908	hypo
chr10	12447269	12448503	1235	-0.203412	hypo
chr10	12462695	12463462	768	-0.248868	hypo
chr10	12498454	12500360	1907	-0.277197	hypo
chr10	12512547	12513904	1358	-0.291352	hypo
chr10	12573230	12573991	762	-0.235536	hypo
chr10	12580004	12581776	1773	-0.256082	hypo
chr10	12631828	12634269	2442	-0.280274	hypo
chr10	12644667	12646442	1776	-0.231866	hypo
chr10	12662148	12662904	757	-0.23237	hypo
chr10	12669330	12669375	46	-0.249517	hypo
chr10	12669752	12669844	93	-0.269683	hypo
chr10	12670454	12671031	578	-0.230201	hypo
chr10	12673679	12673843	165	-0.22517	hypo
chr10	12883417	12884581	1165	-0.211384	hypo
chr10	13133611	13133630	20	-0.207571	hypo
chr10	13134093	13134946	854	-0.215396	hypo
chr10	13144001	13144921	921	-0.281697	hypo
chr10	13148728	13149003	276	-0.203702	hypo
chr10	13149660	13149808	149	-0.255425	hypo
chr10	13158021	13158672	652	-0.203078	hypo
chr10	13215391	13215676	286	-0.227357	hypo
chr10	13313370	13314996	1627	-0.231977	hypo
chr10	13324316	13325067	752	-0.29208	hypo
chr10	13325418	13326321	904	-0.33382	hypo
chr10	13334033	13334707	675	-0.257289	hypo
chr10	13340914	13341081	168	-0.261785	hypo
chr10	13342526	13343607	1082	-0.377035	hypo
chr10	13720242	13721267	1026	-0.336746	hypo
chr10	13721628	13721960	333	-0.344999	hypo
chr10	13722456	13723418	963	-0.251993	hypo
chr10	13741209	13744569	3361	-0.215286	hypo
chr10	13744893	13746058	1166	-0.218625	hypo
chr10	13770861	13771684	824	0.204683	hyper
chr10	13806920	13809534	2615	-0.29043	hypo
chr10	14023468	14026149	2682	-0.204802	hypo
chr10	14573868	14574312	445	-0.265259	hypo
chr10	14574654	14575436	783	-0.246794	hypo
chr10	14577649	14578560	912	-0.232329	hypo
chr10	14609890	14610308	419	-0.233014	hypo
chr10	14610895	14610941	47	-0.240273	hypo
chr10	14611322	14611475	154	-0.225822	hypo
chr10	14611788	14611911	124	-0.209479	hypo
chr10	14627319	14629237	1919	-0.225637	hypo
chr10	14629640	14630207	568	-0.222737	hypo
chr10	14633603	14634571	969	-0.219622	hypo
chr10	14640976	14641812	837	-0.202916	hypo
chr10	14689859	14691218	1360	0.247964	hyper
chr10	14738705	14739725	1021	-0.2474	hypo
chr10	14776297	14777158	862	-0.200972	hypo
chr10	15191263	15193764	2502	-0.229978	hypo
chr10	15347847	15348116	270	-0.21549	hypo
chr10	15375901	15376104	204	-0.206988	hypo
chr10	15376425	15377260	836	-0.285097	hypo
chr10	15383419	15385024	1606	-0.209041	hypo
chr10	15513745	15514638	894	-0.201032	hypo
chr10	15575716	15576229	514	-0.222426	hypo
chr10	15618927	15619482	556	-0.222116	hypo
chr10	15619802	15619846	45	-0.219027	hypo
chr10	15717333	15717490	158	-0.204225	hypo
chr10	15901013	15901232	220	-0.215455	hypo
chr10	15977351	15977877	527	-0.222284	hypo
chr10	15978811	15979090	280	-0.221537	hypo
chr10	16110451	16110715	265	-0.248124	hypo
chr10	16311232	16311785	554	-0.221037	hypo
chr10	17048475	17050144	1670	0.254638	hyper
chr10	17064953	17065617	665	0.215071	hyper
chr10	17065960	17066215	256	0.265858	hyper
chr10	17161386	17161707	322	-0.247278	hypo
chr10	17162748	17163017	270	-0.202148	hypo
chr10	17241263	17241741	479	0.200502	hyper
chr10	17394277	17394663	387	-0.233644	hypo
chr10	17572077	17572357	281	-0.216707	hypo
chr10	17572679	17572887	209	-0.229657	hypo
chr10	17573550	17573730	181	-0.205578	hypo
chr10	17624824	17625016	193	-0.227922	hypo
chr10	17751796	17751853	58	0.243986	hyper
chr10	17752245	17752630	386	0.22046	hyper
chr10	18615767	18615937	171	-0.260165	hypo
chr10	18616334	18616727	394	-0.233016	hypo
chr10	18622065	18622138	74	-0.220818	hypo
chr10	18633552	18633693	142	-0.221781	hypo
chr10	18634465	18635539	1075	-0.225762	hypo
chr10	18904595	18904704	110	-0.210296	hypo
chr10	18926171	18926187	17	-0.30271	hypo
chr10	18927687	18928198	512	-0.388989	hypo
chr10	18929044	18929181	138	-0.3248	hypo
chr10	18938449	18939134	686	-0.37884	hypo
chr10	19030006	19030314	309	-0.217665	hypo
chr10	19194773	19195326	554	-0.264303	hypo
chr10	19197166	19197268	103	-0.241555	hypo
chr10	19234730	19235084	355	-0.219304	hypo
chr10	19322465	19322824	360	-0.222028	hypo
chr10	19323833	19325394	1562	-0.229783	hypo
chr10	19338060	19338117	58	-0.211457	hypo
chr10	19434994	19435164	171	-0.2464	hypo
chr10	19456244	19456682	439	-0.221571	hypo
chr10	19514391	19514941	551	-0.211014	hypo
chr10	19616512	19616874	363	-0.2373	hypo
chr10	19617755	19618167	413	-0.224765	hypo
chr10	19798562	19798776	215	-0.222118	hypo
chr10	20635633	20637138	1506	-0.226072	hypo
chr10	20891373	20891649	277	-0.239209	hypo
chr10	20952012	20952188	177	-0.239232	hypo
chr10	20990994	20991174	181	-0.22148	hypo
chr10	21788370	21788880	511	-0.246785	hypo
chr10	21791952	21792751	800	-0.211233	hypo
chr10	21801131	21801394	264	-0.327282	hypo
[truncated: 18,217 more rows]

## Sheet: Table S9
Supplemental Table S9. Statistics of liver and lung cancer DMRs
Liver cDMRs	Number	Genomic size	Median size	ovelap with normal H3K4me1	ovelap with cancer H3K4me1	ovelap with liver hypermethylated tDMRs	ovelap with liver hypomethylated tDMRs
Hyper DMRs	2185	1626771	600	1665 (76.2%)	702 (32.1%)	46 (2.1%)	292 (13.4%)
CGI DMRs (%)	972 (44.5%)	968605	857	690 (71.0%)	183 (18.8%)	30 (3.1%)	27 (2.8%)
CGI shores DMRs(%)	782 (35.8%)	408766	425	635 (81.2%)	371 (47.4%)	14 (1.8%)	120 (15.3%)
other DMRs (%)	431 (19.7%)	249400	480	340 (78.9%)	148 (34.3%)	2 (0.5%)	145 (33.6%)
Hypo DMRs	580	357682	461	161 (27.8%)	216 (37.2%)	13 (2.2%)	19 (3.3%)
CGI DMRs (%)	21 (3.6%)	15775	768	8 (38.1%)	15 (71.4%)	2 (9.5%)	2 (9.5%)
CGI shores DMRs(%)	257 (44.3%)	129403	375	111 (43.2%)	94 (36.6%)	5 (1.9%)	13 (5.1%)
other DMRs (%)	302 (52.1%)	212504	588.5	42 (13.9%)	107 (35.4%)	6 (2.0%)	4 (1.3%)
Lung cDMRs	Number	Genomic size	Median size	ovelap with normal H3K4me1	ovelap with cancer H3K4me1	ovelap with liver hypermethylated tDMRs	ovelap with liver hypomethylated tDMRs
Hyper DMRs	1461	1158976	669	805 (55.1%)	668 (45.7%)	216 (14.8%)	27 (1.8%)
CGI DMRs (%)	166 (11.4%)	171222	997	100 (60.2%)	24 (14.5%)	17 (10.2%)	5 (3.0%)
CGI shores DMRs (%)	478 (32.7%)	384323	679.5	248 (51.9%)	281 (58.8%)	79 (16.5%)	12 (2.5%)
other DMRs (%)	817 (55.9%)	603431	589	457 (55.9%)	363 (44.4%)	120 (14.7%)	10 (1.2%)
Hypo DMRs	4425	2866090	526	147 (3.3%)	296 (6.7%)	1 (0.02%)	205 (4.6%)
CGI DMRs (%)	56 (1.2%)	45974	745	9 (16.1%)	12 (21.4%)	0 (0%)	3 (5.3%)
CGI shores DMRs (%)	812 (18.3%)	574232	578	75 (9.2%)	115 (14.2%)	1 (0.10%)	44 (5.4%)
other DMRs (%)	3557 (80.4%)	2245884	511	63 (1.8%)	169 (4.8%)	0 (0%)	158 (4.4%)

## Sheet: Table S10
Supplemental Table S10. List of identified liver cancer DMRs
chr	start	end	width	5mC meanDiff	direction (liver cancer compared to normal)
chr1	967836	968990	1155	0.35549	hyper
chr1	1072019	1073082	1064	0.258263	hyper
chr1	1267495	1269090	1596	-0.212811	hypo
chr1	1688694	1689105	412	0.25077	hyper
chr1	2440980	2441483	504	0.202673	hyper
chr1	3401415	3402915	1501	-0.324625	hypo
chr1	3567135	3567943	809	0.257444	hyper
chr1	3612449	3612650	202	0.241598	hyper
chr1	3634581	3635031	451	0.277599	hyper
chr1	3662894	3663575	682	0.275658	hyper
chr1	6105896	6108916	3021	-0.257985	hypo
chr1	6480232	6481151	920	0.232507	hyper
chr1	6594226	6595323	1098	0.306036	hyper
chr1	8043301	8043400	100	0.250628	hyper
chr1	8089873	8090139	267	0.274396	hyper
chr1	8377805	8378858	1054	0.230609	hyper
chr1	8403392	8404216	825	-0.314617	hypo
chr1	9308013	9308262	250	0.317116	hyper
chr1	9312000	9312182	183	0.271571	hyper
chr1	10092188	10092299	112	-0.233071	hypo
chr1	10590000	10590749	750	0.274452	hyper
chr1	10728453	10728817	365	0.274427	hyper
chr1	10735429	10735624	196	0.328041	hyper
chr1	10764512	10764980	469	0.205348	hyper
chr1	12038905	12039688	784	-0.228056	hypo
chr1	12206650	12207823	1174	0.207947	hyper
chr1	12245596	12246076	481	0.239696	hyper
chr1	12654900	12655631	732	0.333259	hyper
chr1	16511146	16511474	329	0.208931	hyper
chr1	17027703	17028063	361	0.300968	hyper
chr1	17746590	17746805	216	0.300663	hyper
chr1	20669223	20671592	2370	0.297956	hyper
chr1	20799070	20800988	1919	0.241443	hyper
chr1	21057866	21058361	496	0.20836	hyper
chr1	21583963	21584380	418	0.270316	hyper
chr1	21594875	21595458	584	0.246364	hyper
chr1	22140769	22141364	596	0.258111	hyper
chr1	22323879	22324177	299	-0.215012	hypo
chr1	24229116	24229893	778	0.250158	hyper
chr1	24246274	24246818	545	-0.209593	hypo
chr1	24515823	24516297	475	0.254949	hyper
chr1	24739535	24739624	90	0.240843	hyper
chr1	26201154	26201179	26	0.263346	hyper
chr1	26503725	26504826	1102	0.250421	hyper
chr1	26677061	26678708	1648	-0.211098	hypo
chr1	26686279	26687472	1194	0.240456	hyper
chr1	26732015	26732235	221	-0.28577	hypo
chr1	26732773	26733933	1161	-0.288778	hypo
chr1	26757605	26758372	768	0.323886	hyper
chr1	27287282	27287776	495	0.216912	hyper
chr1	27676920	27677397	478	0.216383	hyper
chr1	27686632	27687427	796	0.28414	hyper
chr1	27939687	27940785	1099	-0.218424	hypo
chr1	27987022	27987166	145	-0.201278	hypo
chr1	28588568	28589175	608	0.324595	hyper
chr1	28918475	28918608	134	0.206137	hyper
chr1	32409836	32410808	973	0.292258	hyper
chr1	33005914	33006244	331	0.214904	hyper
chr1	33077444	33077705	262	0.271174	hyper
chr1	33335261	33335846	586	0.311154	hyper
chr1	33365703	33366476	774	0.237621	hyper
chr1	33391192	33391670	479	0.218434	hyper
chr1	33772032	33773092	1061	0.296494	hyper
chr1	36042231	36043084	854	0.236676	hyper
chr1	36398245	36398296	52	0.322314	hyper
chr1	36488258	36488517	260	0.206542	hyper
chr1	36786501	36786868	368	0.247779	hyper
chr1	36862294	36862555	262	0.220771	hyper
chr1	38471954	38472003	50	0.202095	hyper
chr1	39324021	39324167	147	0.236328	hyper
chr1	39981272	39981440	169	0.26657	hyper
chr1	40236079	40236282	204	0.229469	hyper
chr1	40419957	40420378	422	0.351817	hyper
chr1	40422000	40423157	1158	0.416607	hyper
chr1	41283771	41284919	1149	0.272297	hyper
chr1	41326050	41326080	31	0.212806	hyper
chr1	41349958	41350071	114	0.293576	hyper
chr1	41350086	41350326	241	0.282455	hyper
chr1	41444712	41444976	265	0.222228	hyper
chr1	43250581	43251419	839	0.239084	hyper
chr1	44174421	44174527	107	-0.235488	hypo
chr1	45116008	45116603	596	0.255396	hyper
chr1	45251766	45252518	753	0.258736	hyper
chr1	45792868	45793330	463	0.221962	hyper
chr1	45827547	45827685	139	0.238538	hyper
chr1	46805259	46805584	326	-0.201088	hypo
chr1	47881425	47883216	1792	0.283763	hyper
chr1	47900187	47900384	198	0.276142	hyper
chr1	47909185	47912339	3155	0.276824	hyper
chr1	47998669	47999758	1090	0.264305	hyper
chr1	51437820	51437915	96	-0.467102	hypo
chr1	51441665	51442008	344	-0.356938	hypo
chr1	51810208	51810462	255	0.203323	hyper
chr1	51981396	51981561	166	0.368221	hyper
chr1	52317724	52317926	203	0.254882	hyper
chr1	52343003	52343196	194	-0.274441	hypo
chr1	53528087	53528940	854	0.226846	hyper
chr1	54940295	54940475	181	0.206627	hyper
chr1	57040226	57040935	710	0.246816	hyper
chr1	59041354	59043732	2379	0.247527	hyper
chr1	61333460	61333749	290	-0.236616	hypo
chr1	61541793	61541847	55	0.234366	hyper
chr1	62660281	62661508	1228	0.263454	hyper
chr1	63784131	63784864	734	0.254018	hyper
chr1	63788628	63789355	728	0.316681	hyper
chr1	63819374	63819888	515	-0.262188	hypo
chr1	64970856	64971847	992	0.21309	hyper
chr1	65530538	65530661	124	0.291694	hyper
chr1	67216963	67217791	829	0.236869	hyper
chr1	67218821	67219233	413	0.219068	hyper
chr1	67600172	67601159	988	0.222463	hyper
chr1	86172426	86173179	754	0.259161	hyper
chr1	87799501	87799982	482	0.228552	hyper
chr1	89357880	89358984	1105	-0.268463	hypo
chr1	92352435	92352719	285	0.236187	hyper
chr1	92945611	92948493	2883	0.271791	hyper
chr1	94314155	94314264	110	0.252641	hyper
chr1	94713856	94713922	67	0.238653	hyper
chr1	95696059	95696837	779	0.257057	hyper
chr1	95697689	95698042	354	0.278263	hyper
chr1	100820430	100820703	274	0.202979	hyper
chr1	109203524	109204377	854	0.219928	hyper
chr1	109631473	109632156	684	-0.208477	hypo
chr1	110210161	110211306	1146	0.231832	hyper
chr1	110610150	110612365	2216	0.264031	hyper
chr1	110753895	110754988	1094	0.226339	hyper
chr1	110948873	110949439	567	-0.250949	hypo
chr1	111743330	111744503	1174	0.246484	hyper
chr1	117036302	117036492	191	0.231212	hyper
chr1	117114126	117114461	336	0.22285	hyper
chr1	119522440	119523029	590	0.319017	hyper
chr1	119523478	119523710	233	0.352065	hyper
chr1	119526542	119527162	621	0.347742	hyper
chr1	119549187	119550831	1645	0.287483	hyper
chr1	120175342	120175491	150	0.229047	hyper
chr1	120255992	120256272	281	0.338351	hyper
chr1	120256620	120257601	982	0.342356	hyper
chr1	145075117	145076142	1026	0.237238	hyper
chr1	146543750	146544956	1207	0.213344	hyper
chr1	146548918	146550420	1503	0.304603	hyper
chr1	146555426	146555674	249	0.30088	hyper
chr1	147737016	147737596	581	0.213661	hyper
chr1	149155529	149156748	1220	0.213456	hyper
chr1	149214699	149215043	345	0.215162	hyper
chr1	150122973	150124200	1228	0.252183	hyper
chr1	150242125	150242188	64	0.228986	hyper
chr1	150451831	150452181	351	-0.228677	hypo
chr1	150552895	150553169	275	0.224208	hyper
chr1	151103526	151104432	907	0.344021	hyper
chr1	151161329	151161742	414	0.203263	hyper
chr1	151297758	151298056	299	0.230147	hyper
chr1	151489079	151489675	597	0.33602	hyper
chr1	151585929	151586058	130	0.214581	hyper
chr1	151659934	151661194	1261	-0.275048	hypo
chr1	151694337	151694687	351	0.234848	hyper
chr1	151800449	151801222	774	0.236243	hyper
chr1	151811680	151812882	1203	0.47853	hyper
chr1	152232454	152232500	47	-0.492853	hypo
chr1	153651914	153652780	867	0.26434	hyper
chr1	153917421	153917827	407	0.282424	hyper
chr1	153929327	153929927	601	0.252793	hyper
chr1	153940960	153941285	326	0.298309	hyper
chr1	154187563	154188033	471	-0.28024	hypo
chr1	154474813	154475660	848	0.350855	hyper
chr1	154538523	154539358	836	-0.251927	hypo
chr1	154768266	154769793	1528	-0.245539	hypo
chr1	154933133	154933251	119	0.231694	hyper
chr1	154990696	154990760	65	0.254896	hyper
chr1	155139207	155139650	444	0.251757	hyper
chr1	155169319	155171688	2370	-0.261028	hypo
chr1	155264492	155265255	764	0.266029	hyper
chr1	155290355	155290542	188	0.26469	hyper
chr1	155827837	155828357	521	-0.261351	hypo
chr1	155937159	155937874	716	0.243004	hyper
chr1	155995354	155996148	795	0.295949	hyper
chr1	155996568	155996665	98	0.22781	hyper
chr1	156051153	156051456	304	0.245551	hyper
chr1	156130455	156131581	1127	0.283653	hyper
chr1	156389635	156391217	1583	0.227655	hyper
chr1	156391992	156392844	853	0.2799	hyper
chr1	156408294	156408887	594	0.258847	hyper
chr1	156425326	156425917	592	-0.201471	hypo
chr1	156480829	156481773	945	-0.21163	hypo
chr1	156765280	156766537	1258	-0.202967	hypo
chr1	156814525	156815921	1397	0.274319	hyper
chr1	156818290	156819142	853	0.218657	hyper
chr1	157164394	157165443	1050	0.306908	hyper
chr1	157249061	157249632	572	0.236673	hyper
chr1	160951156	160952285	1130	0.378243	hyper
chr1	161198014	161198844	831	0.247558	hyper
chr1	161228068	161228287	220	0.271785	hyper
chr1	161274899	161276407	1509	0.353877	hyper
chr1	161494868	161495036	169	0.434761	hyper
chr1	161591336	161591726	391	0.261948	hyper
chr1	162041135	162041481	347	0.236545	hyper
chr1	165601804	165601976	173	0.213492	hyper
chr1	166853147	166854258	1112	0.276386	hyper
chr1	166889599	166890828	1230	0.419063	hyper
chr1	166916452	166917523	1072	0.360155	hyper
chr1	167090492	167091383	892	0.247218	hyper
chr1	167523547	167523992	446	0.22139	hyper
chr1	169428944	169430111	1168	0.303216	hyper
chr1	171623555	171624651	1097	0.234748	hyper
chr1	171809978	171812140	2163	0.30669	hyper
chr1	175567957	175569023	1067	0.249262	hyper
chr1	178064623	178064976	354	0.294722	hyper
chr1	179162830	179163092	263	-0.224512	hypo
chr1	179166725	179167404	680	0.280973	hyper
chr1	179853047	179853157	111	0.286721	hyper
chr1	180904479	180904662	184	-0.215089	hypo
chr1	180905008	180905191	184	-0.22485	hypo
chr1	182025668	182026618	951	0.38048	hyper
chr1	182921642	182922481	840	0.211472	hyper
chr1	183154591	183155900	1310	0.237153	hyper
chr1	183385543	183387751	2209	0.247683	hyper
chr1	183773759	183773887	129	0.261579	hyper
chr1	184653824	184654548	725	-0.227333	hypo
chr1	186648045	186648332	288	-0.417799	hypo
chr1	192778695	192779469	775	0.20359	hyper
chr1	197879299	197880085	787	0.273594	hyper
chr1	197881764	197883888	2125	0.343407	hyper
chr1	197890279	197890646	368	0.270547	hyper
chr1	199929802	199930121	320	-0.204676	hypo
chr1	200374844	200375734	891	-0.240727	hypo
chr1	200376311	200376359	49	-0.200439	hypo
chr1	200478422	200479172	751	-0.271244	hypo
chr1	200842047	200843310	1264	0.266609	hyper
chr1	200982961	200983710	750	0.289992	hyper
chr1	201476665	201477366	702	0.320533	hyper
chr1	201858416	201858887	472	0.247887	hyper
chr1	201915275	201916028	754	0.214328	hyper
chr1	202286954	202287454	501	-0.257071	hypo
chr1	202311967	202312269	303	-0.267351	hypo
chr1	202780619	202781381	763	0.234378	hyper
chr1	202996111	202996685	575	0.261382	hyper
chr1	204119999	204120064	66	0.273351	hyper
chr1	204225146	204226062	917	0.282023	hyper
chr1	204253848	204254133	286	0.285501	hyper
chr1	204478242	204478610	369	-0.332547	hypo
chr1	205011668	205012768	1101	0.250902	hyper
chr1	205289423	205289739	317	-0.225141	hypo
chr1	205637628	205640101	2474	0.420872	hyper
chr1	205646372	205648589	2218	0.36219	hyper
chr1	206684697	206685574	878	0.279863	hyper
chr1	206831232	206831681	450	0.205647	hyper
chr1	207495780	207496223	444	0.277948	hyper
chr1	207817630	207819151	1522	0.27749	hyper
chr1	207981837	207982633	797	0.304799	hyper
chr1	208039495	208041822	2328	0.319353	hyper
chr1	208136035	208136344	310	0.202643	hyper
chr1	209832946	209833280	335	0.2256	hyper
chr1	209851636	209851885	250	0.221202	hyper
chr1	209978692	209979973	1282	0.224905	hyper
chr1	210110740	210112281	1542	0.208659	hyper
chr1	210421456	210422346	891	-0.274939	hypo
chr1	211526006	211526768	763	-0.250901	hypo
chr1	212687577	212688679	1103	0.272976	hyper
chr1	212773296	212774752	1457	-0.262985	hypo
chr1	214152909	214154007	1099	0.360301	hyper
chr1	220863127	220863358	232	0.275954	hyper
chr1	220927067	220927417	351	0.258862	hyper
chr1	220927764	220927773	10	0.257632	hyper
chr1	221049675	221052156	2482	0.309213	hyper
chr1	221061923	221062372	450	0.308632	hyper
chr1	221064339	221065105	767	0.296686	hyper
chr1	221067849	221068379	531	0.355326	hyper
chr1	221068834	221069363	530	0.343364	hyper
chr1	221738940	221739391	452	0.214993	hyper
chr1	224304602	224304642	41	0.294254	hyper
chr1	224305437	224305932	496	0.304262	hyper
chr1	224372074	224372594	521	0.224059	hyper
chr1	225864825	225865490	666	0.256652	hyper
chr1	226075069	226075476	408	0.390892	hyper
chr1	226127113	226127736	624	0.235253	hyper
chr1	226734755	226735153	399	0.22895	hyper
chr1	227070599	227070967	369	0.234891	hyper
chr1	228246263	228248910	2648	0.287987	hyper
chr1	229566492	229569101	2610	0.277521	hyper
chr1	229695410	229695843	434	-0.223146	hypo
chr1	230205505	230206786	1282	0.299127	hyper
chr1	230717244	230717681	438	-0.347154	hypo
chr1	231176501	231177327	827	0.253027	hyper
chr1	231296733	231300073	3341	0.204833	hyper
chr1	232942136	232942549	414	-0.288127	hypo
chr1	233464767	233465127	361	0.249212	hyper
chr1	236174459	236175520	1062	0.266919	hyper
chr1	236229134	236230463	1330	0.324274	hyper
chr1	236849278	236850718	1441	0.220795	hyper
chr1	240160617	240161615	999	0.218071	hyper
chr1	241519417	241521455	2039	0.204637	hyper
chr1	242059296	242059706	411	-0.237484	hypo
chr1	243645699	243645911	213	0.256132	hyper
chr1	243835701	243836228	528	-0.371965	hypo
chr1	244238268	244238908	641	0.205619	hyper
chr1	246945965	246946169	205	0.253651	hyper
chr1	246949703	246950901	1199	-0.328005	hypo
chr1	247170254	247171869	1616	0.201922	hyper
chr1	248020168	248021778	1611	0.245469	hyper
chr10	406831	407672	842	0.277152	hyper
chr10	670920	671382	463	0.226796	hyper
chr10	918283	918400	118	0.2454	hyper
chr10	2368824	2369312	489	-0.378595	hypo
chr10	2369674	2370054	381	-0.384667	hypo
chr10	3894968	3896132	1165	-0.200652	hypo
chr10	4868132	4869224	1093	0.213631	hyper
chr10	6166218	6167011	794	-0.290999	hypo
chr10	6207367	6207643	277	0.205785	hyper
chr10	8093347	8093634	288	0.237087	hyper
chr10	8097540	8098257	718	0.26627	hyper
chr10	12119705	12119979	275	0.275118	hyper
chr10	12131130	12131229	100	0.238136	hyper
chr10	13569218	13569700	483	0.216859	hyper
chr10	14878986	14879285	300	0.277493	hyper
chr10	15355517	15356489	973	0.307132	hyper
chr10	17269602	17273311	3710	0.221553	hyper
chr10	20294569	20295330	762	0.231316	hyper
chr10	21782944	21783289	346	0.265479	hyper
chr10	21817567	21818060	494	0.250543	hyper
chr10	22541716	22542738	1023	0.289362	hyper
chr10	22623377	22623821	445	0.324086	hyper
chr10	22630975	22631141	167	0.28878	hyper
chr10	22634001	22635028	1028	0.227184	hyper
chr10	22764490	22766885	2396	0.231651	hyper
chr10	26515054	26515515	462	-0.302212	hypo
chr10	26515861	26516434	574	-0.325269	hypo
chr10	26680517	26681487	971	0.225343	hyper
chr10	26985759	26985797	39	0.234613	hyper
[truncated: 2,438 more rows]

[truncated: 2 more sheets: Table S11, Table S12]
